# Supplementary material for: A unified and self-reinforcing mechanism of tumor cell immortality
Source: Research Square preprint supplement (doi:10.21203/rs.3.rs-2849176/v1), 2023-05-25
Supplement: Supplementary file 1 [file 2a85649a8e96c250d61f3cb6.xlsx]

## Sheet: Sheet
Application	Name	Cat #	sequences
siRNA	siGENOME Non-Targeting siRNA Pool #1	D-001206-13-05	UAGCGACUAAACACAUCAA
			UAAGGCUAUGAAGAGAUAC
			AUGUAUUGGCCUGUAUUAG
			AUGAACGUGAAUUGCUCAA
	siGENOME Human GABPA (2551) siRNA - SMARTpool	M-011662-01-0005	GAAAUUCUCUGGAGUCAUC
			AGACAUCAAUGAACCAAUA
			GGAAUUGAACCAAAGUUAA
			GAAUUCAGCAUGACCGAUA
	siGENOME Human GABPB1 (2553) siRNA - SMARTpool	M-013083-01-0005	GCAAAUGGAGCUCCCUUUA
			GACCGAACACCAUUACAUA
			CAGCAAGUCAUCACAAUAG
			GCUAAGAGACAAUGUAUCG
	siGENOME Human GABPB2 (126626) siRNA - SMARTpool	M-016074-00-0005	GAAGAGAAGUUGCCACUAA
			AGAAUCAGGUGAAUGUUAA
			GGCCAGCCAUUUAUUGUAA
			GUUAACCUCGCAAGCCUUA
sgRNA	Rosa26_upstream_topstrand		CACCGACAGCAAGTTGTCTAACCCG
	Rosa26_upstream_bottomstrand		AAACCGGGTTAGACAACTTGCTGTC
	Rosa26_downstream_topstrand		CACCGCATCAGCTGTCCTTTATATG
	Rosa26_downstream_bottomstrand		AAACATATAAAGGACAGCTGATGC
	GABPB1L_upstream_topstrand		CACCGTCTTGAACTGTACACAACAA
	GABPB1L_upstream_bottomstrand		AAACTTGTTGTGTACAGTTCAAGAC
	GABPB1L_downstream_topstrand		CACCGGTCTAGGAAATTTCAATAGG
	GABPB1L_downstream_bottomstrand		AAACCCTATTGAAATTTCCTAGACC
	GABPB1_TOTAL_upstream_topstrand		CACCGATGTTTTGTTTAGATGTCCC
	GABPB1_TOTAL_upstream_bottomstrand		AAACGGGACATCTAAACAAAACATC
	GABPB1_TOTAL_downstream_topstrand		CACCGAGAAGCTCTTCAGAAACAGC
	GABPB1_TOTAL_downstream_bottomstrand		AAACGCTGTTTCTGAAGAGCTTCTC
	GABPB1_X2_upstream_topstrand		CACCGCCCTTCAAAAGAGTGTGCTA
	GABPB1_X2_upstream_bottomstrand		AAACTAGCACACTCTTTTGAAGGGC
	GABPB1_X2_downstream_topstrand		CACCGAAAGGCCTTATAAATAGCAC
	GABPB1_X2_downstream_bottomstrand		AAACGTGCTATTTATAAGGCCTTTC
	B1S_PAS_KO_upsteam_topstrand		CACCGGTCTGTCATCTTGATAACAC
	B1S_PAS_KO_upsteam_bottomstrand		AAACGTGTTATCAAGATGACAGACC
	B1S_PAS_KO_downsteam_topstrand		CACCGGAGGGCTTGCTATATGTATA
	B1S_PAS_KO_downsteam_bottomstrand		AAACTATACATATAGCAAGCCCTCC
		97mer.construct
shRNA	shPPP1R12C_1	TGCTGTTGACAGTGAGCGAGAGAAGGTATTTTCGAGATAATAGTGAAGCCACAGATGTATTATCTCGAAAATACCTTCTCCTGCCTACTGCCTCGGA	TTATCTCGAAAATACCTTCTCC
	shPPP1R12C_2	TGCTGTTGACAGTGAGCGAAGAAGGTATTTTCGAGATAAATAGTGAAGCCACAGATGTATTTATCTCGAAAATACCTTCTCTGCCTACTGCCTCGGA	TTTATCTCGAAAATACCTTCTC
	shFirefly	TGCTGTTGACAGTGAGCGCCCGCCTGAAGTCTCTGATTAATAGTGAAGCCACAGATGTATTAATCAGAGACTTCAGGCGGTTGCCTACTGCCTCGGA	TTAATCAGAGACTTCAGGCGGT
	shRenilla	TGCTGTTGACAGTGAGCGCAGGAATTATAATGCTTATCTATAGTGAAGCCACAGATGTATAGATAAGCATTATAATTCCTATGCCTACTGCCTCGGA	TAGATAAGCATTATAATTCCTA
	shGABPB1L_6	TGCTGTTGACAGTGAGCGCCAGTTCCAAATGAGTTGATAATAGTGAAGCCACAGATGTATTATCAACTCATTTGGAACTGTTGCCTACTGCCTCGGA	TTATCAACTCATTTGGAACTGT
	shGABPB1L_7	TGCTGTTGACAGTGAGCGACCAAGTAGATTTACATGTATATAGTGAAGCCACAGATGTATATACATGTAAATCTACTTGGGTGCCTACTGCCTCGGA	TATACATGTAAATCTACTTGGG
	shGABPB1L_9	TGCTGTTGACAGTGAGCGAAAGTTGTGAAATGTATTTAAATAGTGAAGCCACAGATGTATTTAAATACATTTCACAACTTCTGCCTACTGCCTCGGA	TTTAAATACATTTCACAACTTC
	shGABPB1L_10	TGCTGTTGACAGTGAGCGCAGTTGTGAAATGTATTTAAAATAGTGAAGCCACAGATGTATTTTAAATACATTTCACAACTTTGCCTACTGCCTCGGA	TTTTAAATACATTTCACAACTT
	shGABPB1S_2	TGCTGTTGACAGTGAGCGCACTGACAGTATTGTTTTGATATAGTGAAGCCACAGATGTATATCAAAACAATACTGTCAGTATGCCTACTGCCTCGGA	TATCAAAACAATACTGTCAGTA
	shGABPB1S_3	TGCTGTTGACAGTGAGCGATGACAGTATTGTTTTGATACATAGTGAAGCCACAGATGTATGTATCAAAACAATACTGTCAGTGCCTACTGCCTCGGA	TGTATCAAAACAATACTGTCAG
	shGABPB1S_4	TGCTGTTGACAGTGAGCGAAGTCATCCAAAATAAATTCAATAGTGAAGCCACAGATGTATTGAATTTATTTTGGATGACTGTGCCTACTGCCTCGGA	TTGAATTTATTTTGGATGACTG
	shGABPB1S_8	TGCTGTTGACAGTGAGCGCGCCGCAGTCATCCAAAATAAATAGTGAAGCCACAGATGTATTTATTTTGGATGACTGCGGCATGCCTACTGCCTCGGA	TTTATTTTGGATGACTGCGGCA
	shGABPB2_3	TGCTGTTGACAGTGAGCGCGCAGAATCAGGTGAATGTTAATAGTGAAGCCACAGATGTATTAACATTCACCTGATTCTGCATGCCTACTGCCTCGGA	TTAACATTCACCTGATTCTGCA
	shGABPB2_4	TGCTGTTGACAGTGAGCGAAAGCCTTATTTCTTCAACCAATAGTGAAGCCACAGATGTATTGGTTGAAGAAATAAGGCTTGTGCCTACTGCCTCGGA	TTGGTTGAAGAAATAAGGCTTG
Antisense Oligonucleotides	UTR1	* = phosphorothioate (PS) modifications	+C*+T*+A*A*C*C*A*A*C*A*A*C*G*+A*+T*C
	Gapmer control	+ = locked nucleic acid base modification	+T*+T*T*A*A*G*C*C*G*A*T*G*C*G*+T*T
	2'MOE Control (Scramble ASO)	/52MOEr(T,C,G,A)/ or /i2MOEr(T,C,G,A)/ or /32MOEr(T,C,G,A)/ = 2′-O-methoxy-ethyl (2′-MOE) modified nucleic acid bases	/52MOErT/*/i2MOErC/*/i2MOErA/*/i2MOErC/*/i2MOErC/*/i2MOErT/*/i2MOErT/*/i2MOErC/*/i2MOErA/*/i2MOErC/*/i2MOErC/*/i2MOErC/*/i2MOErT/*/i2MOErC/*/i2MOErT/*/i2MOErC/*/i2MOErC/*/i2MOErA/*/i2MOErC/*/32MOErT/
	B1L-ASO1		/52MOErG/*/i2MOErG/*/i2MOErT/*/i2MOErA/*/i2MOErA/*/i2MOErA/*/i2MOErA/*/i2MOErG/*/i2MOErA/*/i2MOErC/*/i2MOErT/*/i2MOErC/*/i2MOErC/*/i2MOErT/*/i2MOErT/*/i2MOErA/*/i2MOErC/*/i2MOErT/*/i2MOErT/*/32MOErC/
	B1L-ASO2		/52MOErC/*/i2MOErC/*/i2MOErG/*/i2MOErG/*/i2MOErG/*/i2MOErT/*/i2MOErA/*/i2MOErA/*/i2MOErA/*/i2MOErA/*/i2MOErG/*/i2MOErA/*/i2MOErC/*/i2MOErT/*/i2MOErC/*/i2MOErC/*/i2MOErT/*/i2MOErT/*/i2MOErA/*/32MOErC/
RT-qPCR Primers	GABPA_F		AAGAACGCCTTGGGATACCCT
	GABPA_R		GTGAGGTCTATATCGGTCATGCT
	GABPB1_F		AAACGGGTGTATCTGCTGTTC
	GABPB1_R		GGCCACTACTGGAGTTTCTGAA
	GABPB1S_F		CCATGCCAGATGGACAAC
	GABPB1S_R		GCAAAGCACACCGGGTAAA
	GABPB1L_F		CGAAATAATTGAAAACCGGGTGGA
	GABPB1L_R		TCTTTCTTTAGGAGCTGCTGTCG
	GABPB2_F		AGCTCTGGAGAAAAACAATGCTG
	GABPB2_R		GCAGCCATACTCACAGGGTC
	GUSB_F		CTCATTTGGAATTTTGCCGATT
	GUSB_R		CCGAGTGAAGATCCCCTTTTTA
	TERT_F		TCACGGAGACCACGTTTCAAA
	TERT_R		TTCAAGTGCTGTCTGATTCCAAT
CRISPR KO genotyping primers	Rosa26_F		CATGAAAATGACAGGTGAAACTCCA
	Rosa26_R		ACCTTATGCATCACATTCACGA
	GABPB1_geno_WT_F		AGTGTCAGGACTCTCTGGGTTTGT
	GABPB1_geno_WT_R		CCATGATGTGCCCCTACACTGTC
	GABPB1_geno_KO_F		TTAGGCCAGCTTTTCTCTGC
	GABPB1_geno_KO_R		CCCATGGCTGTACCTTTGTT
	GABPB1L_F		TTCCTTGCAGTCAGAAATTAATCCA
	GABPB1L_R		TGGCTTAAGTCCAATTATCCATCT
	GABPB1_X2KO_F		TTGCTGCAAACCCTCCAGTA
	GABPB1_X2KO_R		GCCTTCCCCACAACTACCTTC
	B1S_pas_KO_F		TGATACAGAATGAAAGTGCGTAGT
	B1S_pas_KO_R		TGGTATTTTCCTTTAGTGACGTGT
ChIP-qPCR Primers	TERT_ChIP_F		CTGCCCCTTCACCTTCCAG
	TERT_ChIP_R		AGCGCTGCCTGAAACTCG
	GABPB1_ChIP_F		GTTACCACCGGATGTGGAAGT
	GABPB1_ChIP_R		GGAAACCCGGCGCCTTAAT
	GABPB1_promoter_tiling_F1		CGACTGGAGGTTGGCAGTG
	GABPB1_promoter_tiling_R1		CGCCCGTTCCCCTCTCC
	GABPB1_promoter_tiling_F2		GGCTTGCCGGTCCCGAG
	GABPB1_promoter_tiling_R2		TTCCTCTTTCTCCCGCCCAC
	GABPB1_promoter_tiling_F3		CTACCCGGCTTGCCGGTCC
	GABPB1_promoter_tiling_R3		CCTCTTTCTCCCGCCCACTG
	GABPB1_promoter_tiling_F4		CCCTCCTCGGCCCTAGC
	GABPB1_promoter_tiling_R4		CCACTGCCAACCTCCAGTC
	GABPB1_promoter_tiling_F5		GCACACTGCTTCTGGGAGGG
	GABPB1_promoter_tiling_R5		CGCTCGGGACCGGCAAG
	GABPB1_promoter_tiling_F6		GGCACACTGCTTCTGGGAGG
	GABPB1_promoter_tiling_R6		GCTCGGGACCGGCAAGC
	GABPB1_promoter_tiling_F7		CTCCTGGCCCCGCTTATTCC
	GABPB1_promoter_tiling_R7		CCCCTCCCAGAAGCAGTGTG
	GABPB1_promoter_tiling_F8		TCCTGGCCCCGCTTATTCC
	GABPB1_promoter_tiling_R8		CTCCCAGAAGCAGTGTGCCC
	GABPB1_promoter_tiling_F9		CCAGATCATCCCCGCGATTT
	GABPB1_promoter_tiling_R9		CGACCCCCGCGGAATAAG
	GABPB1_promoter_tiling_F10		GTTACCACCGGATGTGGAAGT
	GABPB1_promoter_tiling_R10		GGAAACCCGGCGCCTTAAT
	GABPB1_promoter_tiling_F11		GCGCTTTGTGTGTAGCGG
	GABPB1_promoter_tiling_R11		AACTTCCACATCCGGTGGTA
	GABPB1_promoter_tiling_F12		AGCTTGACTCACTCGCACAC
	GABPB1_promoter_tiling_R12		CACAGGGCGCTATTTTCCGA
	GABPB1_promoter_tiling_F13		AAAATCCTCGGGCGATGAGC
	GABPB1_promoter_tiling_R13		GGACACATGGTGTGCGAGT
	GABPB1_promoter_tiling_F14		ATTCCGCCGCTTTCTTTGTG
	GABPB1_promoter_tiling_R14		CCACTCCCTAGCTGTGTTCC
	GABPB1_promoter_tiling_F15		AACTCCTACCCACCGCAGAA
	GABPB1_promoter_tiling_R15		CACAAAGAAAGCGGCGGAAT
	GABPB1_promoter_tiling_F16		GATTCTGCTAGGCCGCACA
	GABPB1_promoter_tiling_R16		TTCTGCGGTGGGTAGGAGTT
	GABPB1_promoter_tiling_F17		ACCTCACTCGTTCCTTCCCT
	GABPB1_promoter_tiling_R17		GCAGAATCCTGGGAGACGG
	GABPB1_promoter_tiling_F18		GGATCTACGAAACATGAGGCATAA
	GABPB1_promoter_tiling_R18		AAGGAACGAGTGAGGTTCCTTTT
TERTp genotyping Primers	M13_TERTp_PCR_F	Note: The M13 sequences are underlined, bolded, and in red.	GTAAAACGACGGCCAGACGTGGCGGAGGGACTG
	M13_TERTp_PCR_R		CAGGAAACAGCTATGACAGGGCTTCCCACGTGCG
Plasmids	Plasmid Name	ORF sequence	Full Sequence
	pGL4.1-TERT-promoter-WT	GTCCTGCCCCTTCACCTTCCAGCTCCGCCTCCTCCGCGCGGACCCCGCCCCGTCCCGACCCCTCCCGGGTCCCCGGCCCAGCCCCCTCCGGGCCCTCCCAGCCCCTCCCCTTCCTTTCCGCGGCCCCGCCCTCTCCTCGCGGCGCGAGTTTCAGGCAGCGCTGGATCTGGCCTCGGCGGCCAAGCTTGGCAATCCGGTACTGTTGGTAAAGCCAC
	pGL4.1-TERT-promoter-A161C	GTCCTGCCCCTTCACCTTCCAGCTCCGCCTCCTCCGCGCGGACCCCGCCCCGTCCCGACCCCTCCCGGGTCCCCGGCCCAGCCCCCTCCGGGCCCTCCCAGCCCCTCCCCTTCCTTTCCGCGGCCCCGCCCTCTCCTCGCGGCGCGAGTTTCCGGCAGCGCTGGATCTGGCCTCGGCGGCCAAGCTTGGCAATCCGGTACTGTTGGTAAAGCCAC
	pGL4.1-TERT-promoter-A161C+A197T	GTCCTGCCCCTTCACCTTCCAGCTCCGCCTCCTCCGCGCGGACCCCGCCCCGTCCCGACCCCTCCCGGGTCCCCGGCCCAGCCCCCTCCGGGCCCTCCCAGCCCCTCCCCTTCCTTACCGCGGCCCCGCCCTCTCCTCGCGGCGCGAGTTTCCGGCAGCGCTGGATCTGGCCTCGGCGGCCAAGCTTGGCAATCCGGTACTGTTGGTAAAGCCAC
	pGL4.1-TERT-promoter-G228A	GTCCTGCCCCTTCACCTTCCAGCTCCGCCTCCTCCGCGCGGACCCCGCCCCGTCCCGACCCCTCCCGGGTCCCCGGCCCAGCCCCTTCCGGGCCCTCCCAGCCCCTCCCCTTCCTTTCCGCGGCCCCGCCCTCTCCTCGCGGCGCGAGTTTCAGGCAGCGCTGGATCTGGCCTCGGCGGCCAAGCTTGGCAATCCGGTACTGTTGGTAAAGCCAC
	pGL4.1-TERT-promoter-G228A+A197T	GTCCTGCCCCTTCACCTTCCAGCTCCGCCTCCTCCGCGCGGACCCCGCCCCGTCCCGACCCCTCCCGGGTCCCCGGCCCAGCCCCTTCCGGGCCCTCCCAGCCCCTCCCCTTCCTTACCGCGGCCCCGCCCTCTCCTCGCGGCGCGAGTTTCAGGCAGCGCTGGATCTGGCCTCGGCGGCCAAGCTTGGCAATCCGGTACTGTTGGTAAAGCCAC
	pGL4.1-TERT-promoter-G228A+G201T	GTCCTGCCCCTTCACCTTCCAGCTCCGCCTCCTCCGCGCGGACCCCGCCCCGTCCCGACCCCTCCCGGGTCCCCGGCCCAGCCCCTTCCGGGCCCTCCCAGCCCCTCCCCTTACTTTCCGCGGCCCCGCCCTCTCCTCGCGGCGCGAGTTTCAGGCAGCGCTGGATCTGGCCTCGGCGGCCAAGCTTGGCAATCCGGTACTGTTGGTAAAGCCAC
	pGL4.1-TERT-promoter-GG228/229AA	GTCCTGCCCCTTCACCTTCCAGCTCCGCCTCCTCCGCGCGGACCCCGCCCCGTCCCGACCCCTCCCGGGTCCCCGGCCCAGCCCTTTCCGGGCCCTCCCAGCCCCTCCCCTTCCTTTCCGCGGCCCCGCCCTCTCCTCGCGGCGCGAGTTTCAGGCAGCGCTGGATCTGGCCTCGGCGGCCAAGCTTGGCAATCCGGTACTGTTGGTAAAGCCAC
	pGL4.1-TERT-promoter-G228T	GTCCTGCCCCTTCACCTTCCAGCTCCGCCTCCTCCGCGCGGACCCCGCCCCGTCCCGACCCCTCCCGGGTCCCCGGCCCAGCCCCATCCGGGCCCTCCCAGCCCCTCCCCTTCCTTTCCGCGGCCCCGCCCTCTCCTCGCGGCGCGAGTTTCAGGCAGCGCTGGATCTGGCCTCGGCGGCCAAGCTTGGCAATCCGGTACTGTTGGTAAAGCCAC
	pGL4.1-TERT-promoter-GG242/243AA	GTCCTGCCCCTTCACCTTCCAGCTCCGCCTCCTCCGCGCGGACCCCGCCCCGTCCCGACCCCTCCCGGGTTTCCGGCCCAGCCCCCTCCGGGCCCTCCCAGCCCCTCCCCTTCCTTTCCGCGGCCCCGCCCTCTCCTCGCGGCGCGAGTTTCAGGCAGCGCTGGATCTGGCCTCGGCGGCCAAGCTTGGCAATCCGGTACTGTTGGTAAAGCCAC
	pGL4.1-TERT-promoter-GG242/243AA+A197T	GTCCTGCCCCTTCACCTTCCAGCTCCGCCTCCTCCGCGCGGACCCCGCCCCGTCCCGACCCCTCCCGGGTTTCCGGCCCAGCCCCCTCCGGGCCCTCCCAGCCCCTCCCCTTCCTTACCGCGGCCCCGCCCTCTCCTCGCGGCGCGAGTTTCAGGCAGCGCTGGATCTGGCCTCGGCGGCCAAGCTTGGCAATCCGGTACTGTTGGTAAAGCCAC
	pGL4.1-TERT-promoter-G242A	GTCCTGCCCCTTCACCTTCCAGCTCCGCCTCCTCCGCGCGGACCCCGCCCCGTCCCGACCCCTCCCGGGTCTCCGGCCCAGCCCCCTCCGGGCCCTCCCAGCCCCTCCCCTTCCTTTCCGCGGCCCCGCCCTCTCCTCGCGGCGCGAGTTTCAGGCAGCGCTGGATCTGGCCTCGGCGGCCAAGCTTGGCAATCCGGTACTGTTGGTAAAGCCAC
	pGL4.1-TERT-promoter-G243A	GTCCTGCCCCTTCACCTTCCAGCTCCGCCTCCTCCGCGCGGACCCCGCCCCGTCCCGACCCCTCCCGGGTTCCCGGCCCAGCCCCCTCCGGGCCCTCCCAGCCCCTCCCCTTCCTTTCCGCGGCCCCGCCCTCTCCTCGCGGCGCGAGTTTCAGGCAGCGCTGGATCTGGCCTCGGCGGCCAAGCTTGGCAATCCGGTACTGTTGGTAAAGCCAC
	pGL4.1-TERT-promoter-G250A	GTCCTGCCCCTTCACCTTCCAGCTCCGCCTCCTCCGCGCGGACCCCGCCCCGTCCCGACCCCTTCCGGGTCCCCGGCCCAGCCCCCTCCGGGCCCTCCCAGCCCCTCCCCTTCCTTTCCGCGGCCCCGCCCTCTCCTCGCGGCGCGAGTTTCAGGCAGCGCTGGATCTGGCCTCGGCGGCCAAGCTTGGCAATCCGGTACTGTTGGTAAAGCCAC
	pGL4.1-TERT-promoter-G250A+A197T	GTCCTGCCCCTTCACCTTCCAGCTCCGCCTCCTCCGCGCGGACCCCGCCCCGTCCCGACCCCTTCCGGGTCCCCGGCCCAGCCCCCTCCGGGCCCTCCCAGCCCCTCCCCTTCCTTACCGCGGCCCCGCCCTCTCCTCGCGGCGCGAGTTTCAGGCAGCGCTGGATCTGGCCTCGGCGGCCAAGCTTGGCAATCCGGTACTGTTGGTAAAGCCAC
	pGL4.1-TERT-promoter-G250A+G201T	GTCCTGCCCCTTCACCTTCCAGCTCCGCCTCCTCCGCGCGGACCCCGCCCCGTCCCGACCCCTTCCGGGTCCCCGGCCCAGCCCCCTCCGGGCCCTCCCAGCCCCTCCCCTTACTTTCCGCGGCCCCGCCCTCTCCTCGCGGCGCGAGTTTCAGGCAGCGCTGGATCTGGCCTCGGCGGCCAAGCTTGGCAATCCGGTACTGTTGGTAAAGCCAC
	pGL4.1-B1-promoter	ggaaaaaatctacagaaatatctatatcttcgtcatgaacctgactgttgagtttatgaaaaagtggaaaaggaacctcactcgttccttccctggtaccttcacagcgtctcccgtcccagtctgcctagttgaatctagggacacttaaaggtaaatcctagcctcttggctgtccttccgtctcccaggattctgctaggccgcacagttggcaagcttaaaactccaaagattccgcactctccgtctttcaacagtcatgtcacagagacacgaaggttagcacaggaacattagtttccaaactcctacccaccgcagaacaggcgggaaggttcggtggccacccggcctctccgccgcgcacatggccgtccgcagctcccacccccgctg…
	N174-EF1A-Core-B1L-IRES-PURO	ATGTCCCTGGTAGATTTGGGAAAGAAGCTTTTAGAAGCGGCACGAGCAGGTCAAGATGATGAAGTTCGTATTTTGATGGCAAATGGAGCTCCCTTTACTACAGACTGGCTGGGAACTTCTCCACTTCATCTAGCAGCACAGTATGGTCATTATTCCACCACAGAGGTACTGCTGCGAGCTGGTGTGAGCAGAGATGCCAGAACCAAAGTGGACCGAACACCATTACATATGGCAGCTTCTGAGGGCCATGCCAGCATAGTAGAGGTTTTACTTAAGCATGGTGCTGATGTCAATGCAAAGGACATGTTAAAGATGACAGCTCTCCATTGGGCCACAGAACACAATCATCAAGAGGTGGTGGAACTTTTAATCAAATATGGTGCTGATGTACACACGCAA…	tggaagggctaattcactcccaaagaagacaagatatccttgatctgtggatctaccacacacaaggctacttccctgattagcagaactacacaccagggccaggggtcagatatccactgacctttggatggtgctacaagctagtaccagttgagccagataaggtagaagaggccaataaaggagagaacaccagcttgttacaccctgtgagcctgcatgggatggatgacccggagagagaagtgttagagtggaggtttgacagccgcctagcatttcatcacgtggcccgagagctgcatccggagtacttcaagaactgctgatatcgagcttgctacaagggactttccgctggggactttccagggaggcgtggcctgggcgggactg…
	N174-EF1A-Core-B1S-IRES-PURO	ATGTCCCTGGTAGATTTGGGAAAGAAGCTTTTAGAAGCGGCACGAGCAGGTCAAGATGATGAAGTTCGTATTTTGATGGCAAATGGAGCTCCCTTTACTACAGACTGGCTGGGAACTTCTCCACTTCATCTAGCAGCACAGTATGGTCATTATTCCACCACAGAGGTACTGCTGCGAGCTGGTGTGAGCAGAGATGCCAGAACCAAAGTGGACCGAACACCATTACATATGGCAGCTTCTGAGGGCCATGCCAGCATAGTAGAGGTTTTACTTAAGCATGGTGCTGATGTCAATGCAAAGGACATGTTAAAGATGACAGCTCTCCATTGGGCCACAGAACACAATCATCAAGAGGTGGTGGAACTTTTAATCAAATATGGTGCTGATGTACACACGCAA…	tggaagggctaattcactcccaaagaagacaagatatccttgatctgtggatctaccacacacaaggctacttccctgattagcagaactacacaccagggccaggggtcagatatccactgacctttggatggtgctacaagctagtaccagttgagccagataaggtagaagaggccaataaaggagagaacaccagcttgttacaccctgtgagcctgcatgggatggatgacccggagagagaagtgttagagtggaggtttgacagccgcctagcatttcatcacgtggcccgagagctgcatccggagtacttcaagaactgctgatatcgagcttgctacaagggactttccgctggggactttccagggaggcgtggcctgggcgggactg…
	N174-UBC-Core-TERT-IRES-PURO	ATGCCGCGCGCTCCCCGCTGCCGAGCCGTGCGCTCCCTGCTGCGCAGCCACTACCGCGAGGTGCTGCCGCTGGCCACGTTCGTGCGGCGCCTGGGGCCCCAGGGCTGGCGGCTGGTGCAGCGCGGGGACCCGGCGGCTTTCCGCGCGCTGGTGGCCCAGTGCCTGGTGTGCGTGCCCTGGGACGCACGGCCGCCCCCCGCCGCCCCCTCCTTCCGCCAGGTGTCCTGCCTGAAGGAGCTGGTGGCCCGAGTGCTGCAGAGGCTGTGCGAGCGCGGCGCGAAGAACGTGCTGGCCTTCGGCTTCGCGCTGCTGGACGGGGCCCGCGGGGGCCCCCCCGAGGCCTTCACCACCAGCGTGCGCAGCTACCTGCCCAACACGGTGACCGACGCACTGCGGGGG…	tggaagggctaattcactcccaaagaagacaagatatccttgatctgtggatctaccacacacaaggctacttccctgattagcagaactacacaccagggccaggggtcagatatccactgacctttggatggtgctacaagctagtaccagttgagccagataaggtagaagaggccaataaaggagagaacaccagcttgttacaccctgtgagcctgcatgggatggatgacccggagagagaagtgttagagtggaggtttgacagccgcctagcatttcatcacgtggcccgagagctgcatccggagtacttcaagaactgctgatatcgagcttgctacaagggactttccgctggggactttccagggaggcgtggcctgggcgggactg…
	pCW57-B1L	ATGTCCCTGGTAGATTTGGGAAAGAAGCTTTTAGAAGCGGCACGAGCAGGTCAAGATGATGAAGTTCGTATTTTGATGGCAAATGGAGCTCCCTTTACTACAGACTGGCTGGGAACTTCTCCACTTCATCTAGCAGCACAGTATGGTCATTATTCCACCACAGAGGTACTGCTGCGAGCTGGTGTGAGCAGAGATGCCAGAACCAAAGTGGACCGAACACCATTACATATGGCAGCTTCTGAGGGCCATGCCAGCATAGTAGAGGTTTTACTTAAGCATGGTGCTGATGTCAATGCAAAGGACATGTTAAAGATGACAGCTCTCCATTGGGCCACAGAACACAATCATCAAGAGGTGGTGGAACTTTTAATCAAATATGGTGCTGATGTACACACGCAA…	AATTCTCGACCTCGAGACAAATGGCAGTATTCATCCACAATTTTAAAAGAAAAGGGGGGATTGGGGGGTACAGTGCAGGGGAAAGAATAGTAGACATAATAGCAACAGACATACAAACTAAAGAATTACAAAAACAAATTACAAAAATTCAAAATTTTCGGGTTTATTACAGGGACAGCAGAGATCCACTTTGGCCGCGAATCGATATGTCGAGTTTACTCCCTATCAGTGATAGAGAACGTATGTCGAGTTTACTCCCTATCAGTGATAGAGAACGATGTCGAGTTTACTCCCTATCAGTGATAGAGAACGTATGTCGAGTTTACTCCCTATCAGTGATAGAGAACGTATGTCGAGTTTACTCCCTATCAGTGATAGAGAACGTATGTCGAGTTTATC…
