# Supplementary material for: A unified and self-reinforcing mechanism of tumor cell immortality
Source: Research Square preprint supplement (doi:10.21203/rs.3.rs-2849176/v1), 2023-05-25
Supplement: Supplementary file 2 [file 3286815ab9fffd0e00c7ba01.xlsx]

## Sheet: Sheet1
p values from comparison of each siRNA treatment to siNon-targeting within each cell line via linear mixed-effects models.
		TERT expression			GABPA expression			GABPB1 expression			GABPB2 expression
Cancer type	Cell line	siGABPA vs siNon-targeting	siGABPB1 vs siNon-targeting	siGABPB2 vs siNon-targeting	siGABPA vs siNon-targeting	siGABPB1 vs siNon-targeting	siGABPB2 vs siNon-targeting	siGABPA vs siNon-targeting	siGABPB1 vs siNon-targeting	siGABPB2 vs siNon-targeting	siGABPA vs siNon-targeting	siGABPB1 vs siNon-targeting	siGABPB2 vs siNon-targeting
BLCA	5637	0	0	0.7811	0	0.0173	0.0124	0	0.0001	0.0416	0	0	0
BLCA	TCCSUP	0	0	0	0	0.8297	0.0891	0	0	0.2003	0	0	0
BLCA	UM-UC-3	0	0	0	0	0	0.3634	0	0	0.4284	0	0	0
BLCA	HT-1376	0	0	0.0055	0	0.2215	0.0077	0	0	0.0003	0	0	0
BLCA	639-V	0	0	0.6774	0.0001	0	0.5539	0	0	0.022	0	0	0.0004
GBM	LN-229	0	0	0.9973	0	0.0001	0	0	0	0.0865	0.6026	0	0.1068
GBM	U-251	0	0.7596	0.0022	0	0.1444	0.3855	0	0.6405	0.2072	0	0	0
THCA	SW 579	0.0001	0.3664	0.0038	0	0.3525	0.468	0	0.0715	0.7402	0.249	0.1361	0
THCA	MDA-T120	0	0	0.5736	0	0	0	0	0	0.0064	0	0.0032	0
THCA	MDA-T32	0	0	0.6766	0	0.0825	0	0	0	0.0969	0	0.0002	0
THCA	MDA-T85	0	0	0	0	0	0.0007	0	0	0.0919	0	0.0005	0
SKCM	A-375	0	0	0.0006	0	0.0003	0.0212	0	0.0002	0.181	0	0	0
SKCM	SK-MEL-2	0	0	0.0134	0	0	0.1494	0	0.0004	0.5685	0	0	0.0002
SKCM	SK-MEL-5	0	0	0.047	0	0	0.9277	0	0	0.6687	0	0	0
SKCM	WM-266-4	0	0	0.0189	0	0	0.727	0	0.002	0.3184	0	0	0.0001
SKCM	SK-MEL-24	0	0.0001	0.1022	0	0	0.0114	0	0	0.5629	0	0	0
SKCM	WM793B	0	0	0.7575	0	0.0194	0.0401	0	0	0.3224	0	0	0.003
SKCM	SK-MEL-28	0	0	0.0379	0	0	0.1938	0	0	0.0881	0	0	0
SKCM	COLO 829	0	0	0.1991	0	0	0.0176	0	0	0.2121	0.0001	0.0007	0.0052
LIHC	SNU-475	0	0	0	0	0	0	0	0	0	0	0	0
LIHC	SNU-423	0	0	0.3643	0	0.554	0.0005	0	0	0.0002	0.1392	0.0002	0
LIHC	Huh-7	0	0	0.4595	0.0001	0	0.0757	0	0	0.2069	0	0	0.0092
LIHC	SNU-398	0	0	0.0591	0	0	0.261	0	0	0.0492	0	0	0
HNSC	Cal-33	0	0.0012	0	0	0.0214	0.6797	0	0	0.6597	0	0	0.0001
HNSC	CAL 27	0	0.0108	0	0	0	0.0058	0	0	0.0043	0.1489	0	0
HNSC	PE/CA-PJ49	0.0802	0	0	0	0.001	0	0.0009	0	0.8815	0	0.0271	0
KIRC	786-O	0	0	0	0	0	0	0	0	0	0	0.0145	0
MB	Daoy	0	0	0	0	0	0.0003	0	0.0006	0.0073	0	0	0.0159
OV	ES-2	0	0	0	0	0.0038	0.1702	0	0	0.9687	0.0007	0.0001	0
OV	RMG-I	0	0	0.0045	0	0	0.4345	0	0.0002	0.5527	0	0.0013	0
OV	VOA-10816	0	0	0	0	0.0005	0.7669	0	0	0.168	0	0.0002	0
MESO	NCI-H2052	0	0	0.8744	0	0.0572	0.205	0	0	0.3462	0.0006	0.7757	0
LUAD	NCI-H1435	0	0	0.0174	0	0	0.0773	0	0	0.407	0	0	0
LUSC	CALU-1	0	0	0	0	0.5107	0.2357	0	0	0.4825	0	0.4517	0
COAD/READ	MDST8	0.0001	0.0016	0	0	0	0.0931	0	0.0039	0.0897	0.0011	0.0138	0
BRCA	MDA-MB-231	0	0	0.0001	0	0	0.0313	0	0	0.4291	0.0005	0	0
MNG	CH157-MN	0	0	0.0189	0.0044	0.0002	0.2642	0	0	0.0511	0	0.0001	0
LGG	SF10417	0.0015	0.6325	0	0	0	0.079	0	0.0022	0.3614	0	0	0
p values from comparison of each siRNA treatment to siNon-targeting within each cancer type via linear mixed-effects models.
		TERT expression			GABPA expression			GABPB1 expression			GABPB2 expression
	Cancer type	siGABPA vs siNon-targeting	siGABPB1 vs siNon-targeting	siGABPB2 vs siNon-targeting	siGABPA vs siNon-targeting	siGABPB1 vs siNon-targeting	siGABPB2 vs siNon-targeting	siGABPA vs siNon-targeting	siGABPB1 vs siNon-targeting	siGABPB2 vs siNon-targeting	siGABPA vs siNon-targeting	siGABPB1 vs siNon-targeting	siGABPB2 vs siNon-targeting
	BLCA	0	0	0.8883	0	0	0.7978	0	0	0.886	0	0	0
	GBM	0	0.0005	0.2131	0	0.1795	0.0041	0	0.4943	0.7821	0.2625	0	0.0936
	THCA	0	0	0.6681	0	0.0012	0.278	0	0	0.8425	0	0.0008	0
	SKCM	0	0	0.0027	0	0	0.1067	0	0	0.8558	0	0	0
	LIHC	0	0	0.6627	0	0	0.5367	0	0	0.385	0	0	0.0007
	HNSC	0	0.067	0	0	0.0405	0.0061	0	0	0.382	0	0.0005	0.0001
	KIRC	0	0	0	0	0	0	0.0009	0	0	0	0.0145	0
	MB	0	0	0	0	0	0.0003	0	0.0006	0.0073	0	0	0.0159
	OV	0	0	0	0	0	0.3127	0	0	0.3371	0	0	0
	MESO	0	0	0.8744	0	0.0572	0.205	0	0	0.3462	0.0006	0.7757	0
	LUAD	0	0	0.0174	0	0	0.0773	0	0	0.407	0	0	0
	LUSC	0	0	0	0	0.5107	0.2357	0	0	0.4825	0	0.4517	0
	COAD/READ	0.0001	0.0016	0	0	0	0.0931	0	0.0039	0.0897	0.0011	0.0138	0
	BRCA	0	0	0.0001	0	0	0.0313	0	0	0.4291	0.0005	0	0
	MNG	0	0	0.0189	0.0044	0.0002	0.2642	0	0	0.0511	0	0.0001	0
	LGG	0.0015	0.6325	0	0	0	0.079	0	0.0022	0.3614	0	0	0
p values from comparison of each siRNA treatment to siNon-targeting within each TERTp mutation via linear mixed-effects models.
		TERT expression
		siGABPA vs siNon-targeting
	G228A	0
	G250A	0
	GG242/243AA	0
	T161G	0
	G228T	0
	GG228/229AA	0
