# Supplementary material for: A unified and self-reinforcing mechanism of tumor cell immortality
Source: Research Square preprint supplement (doi:10.21203/rs.3.rs-2849176/v1), 2023-05-25
Supplement: Supplementary file 3 [file 78b54e1360e2d64ae42852d8.xlsx]

## Sheet: Sheet1
Cell Line Name	Basal Media	Additional Supplements	Gender	Ethnicity	age	Expected TERTp Mutation	TERTp Sanger Sequencing Results	Source	Cancer	STR % Match Reference	Used for ChIP-qPCR?	Used for siRNA and RT-qPCR?		Basal Media Sources	Manufacturer	Catelogue #
5637	RPMI-1640	10% FBS, 1X Pen/Strep	Male	Asian	68	5.1295228.G.A	5.1295228.G.A	UCSF, Felix Feng lab	Bladder	100	Yes	Yes		RPMI-1640	Corning	10040CV
253J-BV	DMEM	10% FBS, 1X Pen/Strep	Male	Caucasian	53	Wildtype	Wildtype	UCSF, Felix Feng lab	Bladder	100	Yes	No		DMEM	Corning	10013CV
639-V	DMEM	10% FBS, 1X Pen/Strep	Male	Caucasian	69	5.1295228.G.A	5.1295228.G.A	UCSF, Felix Feng lab	Bladder	80	Yes	Yes		EMEM	Corning	10010CV
769-P	RPMI-1640	10% FBS, 1X Pen/Strep	Female	Caucasian	63	Wildtype	Wildtype	UCSF Cell Line Repository	Kidney	100	Yes	No		M5A	Corning	10050CV
786-O	RPMI-1640	10% FBS, 1X Pen/Strep	Male	Caucasian	58	5.1295228.G.A	5.1295228.G.A	UCB Cell Line Repository	Kidney	100	Yes	Yes		DMEM:HamsF12	Corning	10090CV
A-375	RPMI-1640	10% FBS, 1X Pen/Strep	Female	Caucasian	54	5.1295250.G.A	5.1295250.G.A	UCSF, Robert Judson lab	Melanoma	100	Yes	Yes		M199/MCDB105
BICR-6	DMEM	10% FBS, 1X Pen/Strep	Male	Caucasian	0	Wildtype	Wildtype	UCSF, Jennifer Grandis lab	Head and Neck	95.6	Yes	No
Cal 27	DMEM	10% FBS, 1X Pen/Strep	Male	Caucasian	56	5.1295228.G.A	5.1295228.G.A	UCSF, Jennifer Grandis lab	Head and Neck	100	Yes	Yes
Cal-33	DMEM	10% FBS, 1X Pen/Strep	Male	Caucasian	69	5.1295228.G.A	5.1295228.G.A	UCSF, Jennifer Grandis lab	Head and Neck	96.6	Yes	Yes		Additional Supplements	Manufacturer	Catelogue #
CALU-1	M5A	10% FBS, 1X Pen/Strep	Male	Caucasian	47	5.1295228.G.A	homozygous 5.1295228.G.A	ATCC	Lung	100	Yes	Yes		FBS	Gibco	10082-147
CH157-MN	EMEM	10% FBS, 1X Pen/Strep	Female		41	5.1295228.G.A	Homozygous 5.1295228.G.A	UCSF, David Raleigh lab	Meningioma	No Reference Profile	Yes	Yes		Non-Essential Amino Acids (NEAA)
COLO-829	RPMI-1640	10% FBS, 1X Pen/Strep	Male	Caucasian	45	5.1295228-1295229.GG.AA	5.1295228-1295229.GG.AA	ATCC	Melanoma	100	Yes	Yes		Penicillin-Streptomycin (10,000 U/mL)	Gibco	15-140-122
Daoy	EMEM	10% FBS, 1X Pen/Strep	Male	Caucasian	4	5.1295228.G.A	5.1295228.G.A	UCSF Cell Line Repository	Embryonal Tumor	94	Yes	Yes
DI-98	EMEM	10% FBS, 1X Pen/Strep				Wildtype	Wildtype	UCSF, David Raleigh lab	Meningioma	No Reference Profile	Yes	No
ES-2	M5A	10% FBS, 1X Pen/Strep	Female	Caucasian	47	5.1295242-1295243.GG.AA	5.1295242-1295243.GG.AA	UCSF Cell Line Repository	Ovarian	100	Yes	Yes
Fadu	DMEM	10% FBS, 1X Pen/Strep	Male	Caucasian	56	Wildtype	Wildtype	UCSF, Jennifer Grandis lab	Head and Neck	100	Yes	No
HCT116	M5A	10% FBS, 1X Pen/Strep	Male	Caucasian	48	Wildtype	Wildtype	UCSF Cell Line Repository	Colorectal	100	Yes	No
HT-1376	EMEM	10% FBS, 1X Pen/Strep	Female	Caucasian	58	5.1295228.G.A	5.1295228.G.A	UCSF, Felix Feng lab	Bladder	100	Yes	Yes
Huh-7	DMEM	10% FBS, 1X Pen/Strep	Male	Asian	57	5.1295228.G.A	5.1295228.G.A	UCSF, John Gordan lab	Liver	100	Yes	Yes
LN-18	DMEM:F12	10% FBS, 1X Pen/Strep	Male	Caucasian	65	Wildtype	Wildtype	UCSF, Joseph Costello Lab	Glioma	100	Yes	No
LN-229	DMEM:F12	10% FBS, 1X Pen/Strep	Female	Caucasian	60	5.1295228.G.A	5.1295228.G.A	UCSF, Joseph Costello Lab	Glioma	96	Yes	Yes
MDA-MB-231	RPMI-1640	10% FBS, 1X Pen/Strep	Female	Caucasian	51	5.1295228.G.A	5.1295228.G.A	UCSF Cell Line Repository	Breast	100	Yes	Yes
MDA-MB-453	RPMI-1640	10% FBS, 1X Pen/Strep	Female	Caucasian	48	Wildtype	Wildtype	UCSF Cell Line Repository	Breast	100	Yes	No
MDA-T120	RPMI-1640	10% FBS, 1X NEAA, 1X Pen/Strep	Female		72	5.1295228.G.A	5.1295228.G.A	ATCC	Thyroid	100	Yes	Yes
MDA-T32	RPMI-1640	10% FBS, 1X NEAA, 1X Pen/Strep	Male	Caucasian	74	5.1295228.G.A	5.1295228.G.A	ATCC	Thyroid	ATCC	Yes	Yes
MDA-T41	RPMI-1640	10% FBS, 1X NEAA, 1X Pen/Strep	Male	Caucasian	74	Wildtype	Wildtype	ATCC	Thyroid	ATCC	Yes	No
MDA-T85	RPMI-1640	10% FBS, 1X NEAA, 1X Pen/Strep	Male	Hispanic	61	5.1295228.G.A	5.1295228.G.A	ATCC	Thyroid	ATCC	Yes	Yes
MDST8	DMEM	10% FBS, 1X Pen/Strep		Caucasian		5.1295250.G.A	homozygous 5.1295250.G.A	ECACC via Sigma	Colorectal	100	Yes	Yes
NCI-H1299	RPMI-1640	10% FBS, 1X Pen/Strep	Male	Caucasian	43	Wildtype	Wildtype	UCB Cell Line Repository	Lung	94	Yes	No
NCI-H1435	RPMI-1640	5% FBS, 1X Pen/Strep	Female	Caucasian	35	5.1295228.G.T	5.1295228.G.T	ATCC	Lung	ATCC	Yes	Yes
NCI-H2052	RPMI-1640	10% FBS, 1X Pen/Strep	Male	Caucasian	65	5.1295228.G.A	5.1295228.G.A	ATCC	Lung	100	Yes	Yes
PE/CA-PJ49	DMEM	10% FBS, 1X Pen/Strep	Male	Caucasian	57	5.1295250.G.A	5.1295250.G.A	UCSF, Jennifer Grandis lab	Head and Neck	100	Yes	Yes
RMG-I	RPMI-1640	5% FBS, 1X Pen/Strep	Female	Asian	34	5.1295228.G.A	5.1295228.G.A	UCSF, Alan Ashworth lab	Ovarian	96	Yes	Yes
RMG-II	RPMI-1640	5% FBS, 1X Pen/Strep	Female	Asian	53	Wildtype	Wildtype	BCC, David Huntsman lab	Ovarian	100	Yes	No
RPMI 2650	EMEM	10% FBS, 1X Pen/Strep	Male		52	Wildtype	Wildtype	UCSF Cell Line Repository	Head and Neck	100	Yes	No
RPMI-7951	EMEM	10% FBS, 1X NEAA, 1X Pen/Strep	Female	Caucasian	18	5.1295242-1295243.GG.AA	5.1295242-1295243.GG.AA	UCSF Cell Line Repository	Melanoma	96.2	Yes	No
SF10417	Neurocult NS-A (STEMCELL Technologies Cat. #05751)	N-2 supplement (Invitrogen Cat. #17502048), B-27 supplement minus vitamin A (Invitrogen Cat. #12587010), 1% P/S, 1% glutamine, and 1% sodium pyruvate,20 ng/mL EGF (Peprotech Cat. #AF-100-15), bFGF (Peprotech Cat. #AF-100-18B), and PDGF-AA (Peprotech Cat. #AF-100-13A).			#N/A	5.1295228.G.A	5.1295228.G.A	UCSF, Joseph Costello Lab	Glioma	No Reference Profile	Yes	Yes
SK-MEL-2	EMEM	10% FBS, 1X NEAA, 1X Pen/Strep	Male	Caucasian	60	5.1295250.G.A	5.1295250.G.A	UCSF, Robert Judson lab	Melanoma	96.9	Yes	Yes
SK-MEL-24	EMEM	10% FBS, 1X NEAA, 1X Pen/Strep	Male	Caucasian	67	5.1295228.G.A	5.1295228.G.A	UCSF Cell Line Repository	Melanoma	93.7	No	Yes
SK-MEL-28	EMEM	10% FBS, 1X NEAA, 1X Pen/Strep	Male	Caucasian	51	5.1295161.T.G	5.1295161.T.G	UCSF Cell Line Repository	Melanoma	83.8	Yes	Yes
SK-MEL-5	EMEM	10% FBS, 1X Pen/Strep	Female	Caucasian	24	5.1295242-1295243.GG.AA	5.1295242-1295243.GG.AA	UCSF, Robert Judson lab	Melanoma	96.7	Yes	Yes
SNU-182	RPMI-1640	10% FBS, 1X Pen/Strep	Male	Asian	24	Wildtype	Wildtype	UCSF, John Gordan lab	Liver	100	Yes	No
SNU-387	RPMI-1640	10% FBS, 1X Pen/Strep	Female	Asian	41	5.1295228.G.A	5.1295228.G.A	UCSF, John Gordan lab	Liver	100	Yes	No
SNU-398	RPMI-1640	10% FBS, 1X Pen/Strep	Male	Asian	42	5.1295228.G.A	5.1295228.G.A	UCSF, John Gordan lab	Liver	100	Yes	Yes
SNU-423	RPMI-1640	10% FBS, 1X Pen/Strep	Male	Asian	40	5.1295228.G.A	5.1295228.G.A	UCSF, John Gordan lab	Liver	96	Yes	Yes
SNU-475	RPMI-1640	10% FBS, 1X Pen/Strep	Male	Asian	43	5.1295228.G.A	5.1295228.G.A	UCSF, John Gordan lab	Liver	100	Yes	Yes
SW 579	RPMI-1640	10% FBS, 1X Pen/Strep	Male	Caucasian	59	5.1295228.G.A	5.1295228.G.A	UCSF Cell Line Repository	Thyroid	88	Yes	Yes
TCCSUP	EMEM	10% FBS, 1X Pen/Strep	Female	Caucasian	67	5.1295228.G.A	5.1295228.G.A	UCSF, Felix Feng lab	Bladder	100	Yes	Yes
U-251 MG (KO)	DMEM:F12	10% FBS, 1X Pen/Strep	Male	Caucasian	75	5.1295228.G.A	5.1295228.G.A	UCSF, Joseph Costello Lab	Glioma	89.6	Yes	Yes
UM-UC-3	EMEM	10% FBS, 1X Pen/Strep	Male	Caucasian	0	5.1295228.G.A	5.1295228.G.A	UCSF, Felix Feng lab	Bladder	100	Yes	Yes
VOA-10816	M199/MCDB105	5% FBS, 1X Pen/Strep	Female	#N/A	#N/A	5.1295228.G.A	5.1295228.G.A	BCC, David Huntsman lab	Ovarian	96.2	Yes	Yes
VOA-4841	M199/MCDB105	5% FBS, 1X Pen/Strep	Female	#N/A	#N/A	Wildtype	Wildtype	BCC, David Huntsman lab	Ovarian	100	Yes	No
WM-266-4	EMEM	10% FBS, 1X NEAA, 1X Pen/Strep	Female	#N/A	55	5.1295250.G.A	5.1295250.G.A	UCSF Cell Line Repository	Melanoma	100	Yes	Yes
WM793B	DMEM	10% FBS, 1X Pen/Strep	Male	Caucasian	37	5.1295228.G.A	5.1295228.G.A	UCSF, Robert Judson lab	Melanoma	96.3	Yes	Yes
293T	DMEM	10% FBS, 1X Pen/Strep
