# Supplementary material for: A unified and self-reinforcing mechanism of tumor cell immortality
Source: Research Square preprint supplement (doi:10.21203/rs.3.rs-2849176/v1), 2023-05-25
Supplement: Supplementary file 4 [file c6640e2c635fc735edd262cd.xlsx]

## Sheet: A375-B1TKO-Parental-DESeq2
Gene_Name	Base_Mean_All_Samples	Log2(Treatment/Control)	Log2FC_Standard_Error	Wald_Statistic	p-value	Benjamini_Hochberg_Correction	q-value
A1BG-AS1	79.5517	-0.0241369	0.295136	-0.0817822	0.93482	0.970652	0.545914
A1BG	169.236	0.0947256	0.267469	0.354155	0.723222	0.858355	0.482756
A2M	2211.17	2.18024	0.916095	2.37993	0.0173158	0.101778	0.057242
A4GALT	434.069	-0.384371	0.558474	-0.688254	0.491293	0.706511	0.397356
AAAS	1193.59	-0.414549	0.137789	-3.00858	0.00262474	0.0311792	0.0175358
AACS	1492.37	0.0658107	0.147822	0.445202	0.656174	0.817224	0.459623
AACSP1	87.5393	0.041174	0.411867	0.0999692	0.920369	0.963255	0.541754
AADAT	504.165	0.0628228	0.332202	0.18911	0.850006	0.930728	0.52346
AAED1	163.061	-0.172815	0.282324	-0.612116	0.540461	0.742338	0.417506
AAGAB	1198.73	-0.034143	0.148925	-0.229264	0.818664	0.913736	0.513904
AAK1	2363.42	0.347781	0.229781	1.51353	0.130146	0.339164	0.190753
AAMDC	66.7058	0.18557	0.355365	0.522195	0.601535	0.785198	0.441611
AAMP	2235.17	0.128894	0.124075	1.03884	0.298878	0.544693	0.306346
AAR2	1446.11	-0.0847119	0.0949671	-0.892013	0.372386	0.61205	0.344229
AARD	48.2124	1.33742	0.42467	3.14931	0.00163656	0.0227648	0.0128034
AARS	6617.37	-0.226095	0.240168	-0.941406	0.346497	0.589843	0.33174
AARS2	988.198	-0.428252	0.198402	-2.15851	0.0308882	0.146372	0.0823225
AARSD1	504.105	-0.157708	0.517814	-0.304565	0.760697	0.882248	0.496194
AASDH	436.824	-0.268923	0.266785	-1.00801	0.313449	0.559368	0.3146
AASDHPPT	2153.15	0.00853525	0.185676	0.0459686	0.963335	0.983747	0.553279
AASS	915.726	-0.870917	0.373226	-2.33349	0.0196227	0.110315	0.0620434
AATBC	57.1783	-0.267775	0.585917	-0.457018	0.647658	0.813761	0.457675
AATF	440.506	1.61955	0.450719	3.59326	0.000326568	0.00747666	0.00420503
AATK	217.539	0.649947	0.562241	1.15599	0.247683	0.489897	0.275528
ABALON	77.77	0.709037	0.416216	1.70353	0.0884686	0.272811	0.153435
ABAT	572.91	0.725853	0.390844	1.85714	0.0632912	0.226282	0.127266
ABCA1	826.69	-0.328976	0.396444	-0.829816	0.406643	0.641126	0.360582
ABCA10	104.961	-0.643264	0.556567	-1.15577	0.247774	0.489942	0.275553
ABCA11P	126.026	-0.594483	0.398529	-1.49169	0.135779	0.348096	0.195776
ABCA12	30.6898	1.71852	0.754548	2.27754	0.0227537	0.120903	0.0679982
ABCA13	59.1437	0.467758	0.690883	0.677045	0.498378	0.71275	0.400865
ABCA2	3640.54	0.410778	0.248666	1.65193	0.0985495	0.289457	0.162797
ABCA3	145.644	1.77996	0.480844	3.70175	0.000214116	0.00554844	0.00312055
ABCA5	215.381	-0.240459	0.314019	-0.765747	0.443827	0.671116	0.377449
ABCA6	29.3064	-0.818043	0.579017	-1.41281	0.15771	0.378304	0.212766
ABCA7	204.354	0.27187	0.361528	0.752004	0.452049	0.677029	0.380775
ABCA8	182.697	-1.59201	1.0748	-1.48122	0.138549	0.351913	0.197923
ABCB1	144.885	-0.219441	0.496047	-0.44238	0.658214	0.818484	0.460332
ABCB10	886.385	-0.284391	0.240152	-1.18421	0.236329	0.475579	0.267475
ABCB4	101.001	-0.311653	0.782	-0.398533	0.690237	0.836896	0.470687
ABCB6	800.979	0.360018	0.167731	2.14641	0.0318405	0.149549	0.0841095
ABCB7	591.436	-0.234933	0.171852	-1.36707	0.171605	0.396756	0.223144
ABCB8	740.505	0.02925	0.170618	0.171436	0.863881	0.936909	0.526936
ABCB9	560.36	0.345221	0.290045	1.19023	0.233954	0.472646	0.265826
ABCC1	627.963	-0.281425	0.204967	-1.37302	0.169745	0.394045	0.221619
ABCC10	504.308	-0.069146	0.162146	-0.426442	0.669786	0.825277	0.464153
ABCC2	722.043	0.217211	0.693394	0.313258	0.754085	0.878508	0.494091
ABCC3	574.464	0.818345	0.680057	1.20335	0.228842	0.466339	0.262279
ABCC4	1064.54	-0.821756	0.273984	-2.99928	0.00270615	0.0319242	0.0179548
ABCC5	725.182	-0.0502586	0.219553	-0.228913	0.818936	0.913755	0.513914
ABCD1	1013.23	-0.0579409	0.242579	-0.238853	0.811219	0.909284	0.5114
ABCD3	1184.06	-0.0884038	0.135395	-0.652935	0.513798	0.723151	0.406715
ABCD4	519.148	-0.368677	0.208922	-1.76466	0.0776205	0.253699	0.142685
ABCE1	3330.61	-0.0295584	0.221114	-0.13368	0.893656	0.950003	0.534301
ABCF1	139.568	0.866137	0.60294	1.43652	0.150853	0.369244	0.20767
ABCF2	2764.29	0.212647	0.186148	1.14235	0.253308	0.496668	0.279336
ABCF3	944.159	0.356082	0.106496	3.34363	0.000826911	0.0141235	0.00794335
ABCG1	45.4948	-0.901761	0.46871	-1.92392	0.0543644	0.206807	0.116312
ABCG2	155.923	1.3092	0.793253	1.65042	0.0988561	0.289983	0.163092
ABCG4	14.3189	-0.132749	0.436697	-0.303983	0.761141	0.882416	0.496289
ABHD1	23.0752	0.356197	0.484758	0.734794	0.462465	0.686319	0.386
ABHD10	1536.27	0.742807	0.295881	2.51049	0.0120562	0.0831805	0.0467824
ABHD11	331.031	0.232289	0.220453	1.05369	0.292024	0.537465	0.302281
ABHD12	1186.78	-0.125945	0.119564	-1.05337	0.292173	0.53767	0.302397
ABHD13	520.457	-0.182976	0.239077	-0.765344	0.444066	0.671182	0.377486
ABHD14A	201.388	0.120101	0.259335	0.46311	0.643285	0.811196	0.456233
ABHD14B	1530.04	-0.48052	0.234692	-2.04745	0.0406139	0.17399	0.0978556
ABHD15	442.96	0.208436	0.156938	1.32814	0.184132	0.412799	0.232166
ABHD16A	21.2455	-0.573424	0.894984	-0.640709	0.521711	0.729159	0.410094
ABHD16B	98.2313	0.00215841	0.355118	0.006078	0.99515	0.997866	0.56122
ABHD17A	879.233	-0.379157	0.160317	-2.36504	0.0180281	0.104048	0.0585189
ABHD17B	900.772	0.0586383	0.152986	0.383293	0.701503	0.844659	0.475053
ABHD17C	2627.41	-0.704314	0.682571	-1.03186	0.30214	0.547851	0.308122
ABHD2	7680.03	0.755427	0.416538	1.81359	0.0697415	0.238225	0.133982
ABHD3	187.477	-1.01735	0.43508	-2.33831	0.0193714	0.109438	0.06155
ABHD4	340.479	0.603647	0.255453	2.36305	0.0181254	0.104396	0.0587143
ABHD5	465.495	0.361769	0.249691	1.44887	0.147375	0.364243	0.204858
ABHD6	379.949	0.0815268	0.320084	0.254705	0.798951	0.901946	0.507273
ABHD8	687.466	-0.0729744	0.274176	-0.266159	0.790117	0.897909	0.505002
ABI1	806.685	-0.0831983	0.138968	-0.598687	0.549381	0.749347	0.421448
ABI2	1905.46	-0.417409	0.146042	-2.85814	0.00426135	0.0424268	0.0238617
ABI3BP	51.0715	-1.83907	1.0954	-1.6789	0.0931717	0.281038	0.158062
ABL1	3365.86	-0.139252	0.102758	-1.35515	0.17537	0.401768	0.225962
ABL2	3222.32	-0.305907	0.249684	-1.22517	0.22051	0.455976	0.25645
ABLIM1	802.561	0.19671	0.218275	0.901204	0.36748	0.609066	0.342551
ABLIM2	55.8196	2.85698	0.848942	3.36535	0.000764472	0.0135479	0.0076196
ABLIM3	480.189	0.0887588	0.478177	0.185619	0.852743	0.93181	0.524069
ABR	441.501	0.452653	0.438055	1.03332	0.301453	0.547101	0.307701
ABRACL	399.515	0.525267	0.214843	2.44489	0.0144895	0.0923639	0.0519473
ABT1	596.417	-0.0331346	0.187961	-0.176285	0.86007	0.935543	0.526168
ABTB1	379.889	-0.281907	0.769936	-0.366144	0.714258	0.851853	0.479099
ABTB2	977.447	-0.28572	0.241369	-1.18375	0.236513	0.475874	0.267641
ACAA1	940.487	0.696741	0.181052	3.84829	0.000118943	0.00355094	0.00199712
ACAA2	533.378	-0.200569	0.209473	-0.957495	0.338317	0.581918	0.327283
ACACA	329.177	-0.225677	0.396042	-0.56983	0.568793	0.762174	0.428662
ACACB	302.64	-0.255973	0.298295	-0.858121	0.390826	0.627721	0.353043
ACAD10	774.245	-0.365361	0.273249	-1.3371	0.18119	0.4096	0.230367
ACAD11	395.865	-0.376184	0.471601	-0.797674	0.42506	0.655019	0.368396
ACAD8	516.601	0.645842	0.155495	4.15347	3.27e-05	0.00137616	0.000773979
ACAD9	911.593	0.214513	0.169241	1.2675	0.204977	0.438407	0.246569
ACADM	886.413	-0.0103902	0.283638	-0.0366317	0.970779	0.986894	0.555049
ACADS	164.757	-0.395653	0.446382	-0.886356	0.375426	0.613958	0.345302
ACADSB	649.72	0.311125	0.253047	1.22951	0.218879	0.454029	0.255355
ACADVL	10547	0.486438	0.206013	2.36119	0.0182162	0.104708	0.05889
ACAN	842.796	-1.89554	1.04382	-1.81597	0.069375	0.237345	0.133488
ACAP1	55.6908	0.543906	0.4277	1.2717	0.203479	0.436991	0.245773
ACAP2	1046.64	-0.522241	0.279614	-1.86772	0.0618006	0.223299	0.125588
ACAP3	985.34	-0.13109	0.271887	-0.482147	0.629701	0.802367	0.451267
ACAT1	1395.45	0.173511	0.28035	0.61891	0.535976	0.740221	0.416315
ACAT2	388.319	-0.628803	0.325558	-1.93146	0.0534264	0.204496	0.115013
ACBD3	1460.38	-1.07871	0.220314	-4.89622	9.77e-07	0.000111648	6.28e-05
ACBD4	183.788	-0.158091	0.344116	-0.459411	0.645939	0.81264	0.457045
ACBD5	839.456	-0.289352	0.160095	-1.80737	0.070704	0.239875	0.13491
ACBD6	849.985	-0.185116	0.21983	-0.842087	0.399739	0.635926	0.357658
ACBD7	99.8666	-0.955585	0.410299	-2.329	0.0198592	0.111121	0.062497
ACCS	185.982	-0.0943828	0.368999	-0.255781	0.79812	0.901621	0.50709
ACD	657.831	-0.651134	0.213381	-3.05151	0.00227693	0.0284716	0.016013
ACE	13.655	-0.417149	0.447804	-0.931543	0.351573	0.594809	0.334533
ACER2	122.31	0.869916	0.23218	3.74673	0.000179153	0.00481663	0.00270897
ACER3	970.895	0.207513	0.258949	0.801366	0.42292	0.654039	0.367845
ACHE	48.1988	0.232141	0.772257	0.300601	0.763719	0.883657	0.496987
ACIN1	3557.44	-0.167187	0.131392	-1.27243	0.203219	0.436929	0.245738
ACLY	8784.73	0.0104061	0.154687	0.0672722	0.946365	0.976414	0.549155
ACO1	1227.39	0.189713	0.288531	0.657513	0.510851	0.721418	0.40574
ACO2	2359.49	0.21578	0.110777	1.94788	0.0514295	0.20033	0.112669
ACOT1	28.3653	-0.090242	0.339187	-0.266054	0.790198	0.897909	0.505002
ACOT11	14.1738	-1.57732	0.725613	-2.17378	0.0297219	0.142877	0.0803567
ACOT13	311.953	0.19918	0.16254	1.22543	0.220415	0.455976	0.25645
ACOT2	251.166	0.182391	0.247389	0.737265	0.460961	0.685084	0.385305
ACOT7	5425.12	0.12083	0.202471	0.596775	0.550658	0.750017	0.421825
ACOT8	378.246	-0.552092	0.289236	-1.9088	0.0562883	0.211376	0.118882
ACOT9	975.893	-0.14701	0.185605	-0.792057	0.428327	0.65826	0.370219
ACOX1	1499.16	0.381437	0.162981	2.34038	0.019264	0.109026	0.0613184
ACOX2	292.855	0.921624	0.387591	2.37782	0.0174151	0.102194	0.0574761
ACOX3	445.613	0.00249317	0.230554	0.0108138	0.991372	0.996057	0.560203
ACP1	1736.62	0.220009	0.110373	1.99332	0.0462266	0.188726	0.106143
ACP2	1032.64	0.316795	0.239204	1.32437	0.185379	0.414558	0.233156
ACP5	187.236	-1.42615	0.596566	-2.3906	0.0168209	0.100106	0.0563015
ACP6	921.864	-0.0174321	0.326227	-0.0534356	0.957385	0.981564	0.552052
ACPP	2196.11	4.49705	1.1807	3.8088	0.000139645	0.00404915	0.00227732
ACRC	36.5171	0.047753	0.409057	0.116739	0.907067	0.957279	0.538393
ACRV1	16.6198	-0.0196618	0.396082	-0.0496407	0.960409	0.982876	0.552789
ACSF2	217.141	-0.172309	0.450946	-0.382105	0.702383	0.845157	0.475333
ACSF3	496.626	-0.790809	0.240116	-3.29345	0.000989661	0.0160867	0.00904747
ACSL1	999.266	0.500212	0.180764	2.76721	0.00565389	0.0513111	0.0288584
ACSL3	6889.76	-0.00739059	0.373991	-0.0197614	0.984234	0.99225	0.558061
ACSL4	2216.4	-0.0337042	0.194771	-0.173045	0.862616	0.936289	0.526588
ACSL5	35.3549	-0.111259	0.838237	-0.13273	0.894407	0.950171	0.534395
ACSL6	22.6466	1.60393	0.542094	2.95877	0.0030887	0.0344766	0.0193904
ACSM3	88.4342	1.2036	0.602826	1.99659	0.0458696	0.187803	0.105624
ACSS1	254.698	-0.755414	0.482692	-1.565	0.117582	0.319847	0.179888
ACSS2	1429.39	-0.428554	0.360454	-1.18893	0.234467	0.472934	0.265987
ACSS3	248.671	-0.598955	0.528176	-1.13401	0.256792	0.500603	0.281549
ACTA2	983.037	1.83991	0.374261	4.91611	8.83e-07	0.000103909	5.84e-05
ACTB	38335.6	0.000614394	0.15891	0.00386631	0.996915	0.998659	0.561666
ACTBL2	211.63	1.54161	0.760057	2.02828	0.0425317	0.178838	0.100582
ACTG1	47040.9	0.244089	0.127497	1.91446	0.0555615	0.209691	0.117934
ACTG1P20	48.265	-0.523588	0.313097	-1.67229	0.0944678	0.283206	0.159281
ACTL10	158.629	0.492091	0.262963	1.87133	0.061299	0.222158	0.124946
ACTL6A	1004.95	-0.263268	0.283328	-0.929196	0.352787	0.595764	0.33507
ACTL8	35.5125	-1.18365	0.834274	-1.41878	0.155962	0.375683	0.211292
ACTN1	9305.34	-0.164746	0.173554	-0.949246	0.342496	0.585746	0.329435
ACTN2	59.8155	0.190385	0.451155	0.421994	0.673029	0.827128	0.465194
ACTN4	20744.9	-0.426138	0.134246	-3.1743	0.00150201	0.0214808	0.0120812
ACTR10	861.279	0.382947	0.146429	2.61525	0.00891623	0.0680383	0.0382661
ACTR1A	2793.94	-0.136382	0.0966117	-1.41165	0.158053	0.378746	0.213015
ACTR1B	985.494	-0.165449	0.143796	-1.15058	0.249906	0.492618	0.277058
ACTR2	7008.89	-0.222063	0.164175	-1.3526	0.176183	0.402792	0.226538
ACTR3	2775.29	0.0692369	0.123343	0.561335	0.574569	0.766377	0.431026
ACTR3B	528.026	0.720319	0.229283	3.14161	0.00168022	0.0230627	0.0129709
ACTR5	309.57	0.0455115	0.225082	0.2022	0.83976	0.925247	0.520378
ACTR6	650.434	-0.846856	0.184655	-4.58616	4.51e-06	0.000345976	0.000194584
ACTR8	897.338	0.321101	0.162082	1.98111	0.0475792	0.191627	0.107775
ACVR1	562.144	0.010719	0.30918	0.0346692	0.972344	0.987523	0.555403
ACVR1B	691.563	0.0986294	0.134933	0.73095	0.46481	0.688427	0.387185
ACVR1C	22.1859	-0.545488	0.773536	-0.705188	0.480693	0.699123	0.393201
ACVR2A	157.972	-0.61859	0.22592	-2.73809	0.00617968	0.0542616	0.0305178
ACVR2B-AS1	53.3285	0.129153	0.548844	0.235318	0.813962	0.911195	0.512475
ACVR2B	794.371	-0.262072	0.216939	-1.20804	0.22703	0.463976	0.26095
ACY1	1209.53	-0.274605	0.421599	-0.651342	0.514826	0.723939	0.407158
ACYP1	90.7573	-0.584196	0.251468	-2.32314	0.0201717	0.111995	0.0629884
ACYP2	111.349	0.821934	0.3904	2.10536	0.0352599	0.159392	0.0896455
ADA	356.845	-0.613858	0.301309	-2.0373	0.0416197	0.176453	0.0992407
ADAL	277.661	-0.797368	0.222627	-3.58163	0.00034146	0.00773004	0.00434753
ADAM10	4373.52	0.0444598	0.222593	0.199736	0.841687	0.925639	0.520598
ADAM11	131.904	-0.630436	0.42305	-1.49022	0.136167	0.348628	0.196076
ADAM12	350.79	0.454296	0.351413	1.29277	0.196091	0.428546	0.241023
ADAM15	4746.81	0.234269	0.132448	1.76876	0.0769338	0.252626	0.142082
ADAM17	1406.5	0.0366587	0.196836	0.186239	0.852257	0.931567	0.523932
ADAM19	2461.04	0.113892	0.431758	0.263786	0.791945	0.898683	0.505437
ADAM1A	87.1954	0.130147	0.255969	0.508447	0.61114	0.79093	0.444835
ADAM21	13.9011	0.618396	0.599723	1.03114	0.302477	0.548254	0.308349
ADAM22	334.308	-1.3985	0.459871	-3.04107	0.00235736	0.0290714	0.0163504
ADAM23	1069.48	0.422051	0.276071	1.52878	0.126319	0.332843	0.187197
ADAM8	94.4041	-0.373155	0.407652	-0.915377	0.359994	0.60179	0.338459
ADAM9	2000.72	-0.381939	0.251943	-1.51597	0.129526	0.338398	0.190322
ADAMTS1	864.847	1.46369	0.362904	4.03326	5.5e-05	0.00200576	0.00112808
ADAMTS10	22.1704	-3.48612	0.87738	-3.97333	7.09e-05	0.00245916	0.00138308
ADAMTS12	384.704	-1.05076	0.772424	-1.36034	0.173722	0.399396	0.224629
ADAMTS13	152.192	-0.474864	0.504844	-0.940617	0.346901	0.590116	0.331893
ADAMTS15	246.86	0.19837	0.376266	0.527206	0.59805	0.782518	0.440104
ADAMTS16	76.8725	-1.79408	0.56631	-3.16802	0.00153481	0.0217976	0.0122594
ADAMTS17	47.3311	-0.72302	0.810118	-0.892487	0.372132	0.61205	0.344229
ADAMTS2	53.0637	-2.75843	0.913257	-3.02043	0.00252418	0.0305761	0.0171966
ADAMTS20	60.2581	-1.40211	0.513285	-2.73165	0.00630176	0.0547298	0.0307811
ADAMTS3	220.563	-0.602182	0.370439	-1.62559	0.104037	0.299309	0.168337
ADAMTS4	38.5305	-1.48937	0.460039	-3.23748	0.00120589	0.0185611	0.0104391
ADAMTS6	268.698	1.33035	0.48994	2.71534	0.00662078	0.0562205	0.0316196
ADAMTS7	261.006	-0.415072	0.500447	-0.829402	0.406877	0.641354	0.36071
ADAMTS9	395.305	0.242246	0.81083	0.298763	0.765121	0.884534	0.49748
ADAMTSL1	18.456	0.423663	0.963035	0.439924	0.659992	0.819643	0.460984
ADAMTSL4-AS1	17.9366	-0.394676	0.600122	-0.657661	0.510756	0.721381	0.40572
ADAMTSL4	762.276	0.0898349	0.325086	0.276342	0.782285	0.894543	0.503109
ADAMTSL5	97.226	-1.26102	0.450222	-2.80088	0.0050964	0.0479839	0.0269871
ADAP1	57.9808	-1.00234	0.558173	-1.79575	0.0725342	0.242967	0.13665
ADAR	10255.3	0.110658	0.126861	0.872278	0.383057	0.620674	0.34908
ADARB1	435.038	-0.804201	0.258344	-3.11291	0.00185255	0.0245579	0.0138119
ADARB2-AS1	42.964	6.80885	1.86725	3.64645	0.00026589	0.00639296	0.00359553
ADARB2	11.7151	1.21809	0.816091	1.49258	0.135546	0.347784	0.195601
ADAT1	1096.3	-0.53888	0.167435	-3.21845	0.00128887	0.019334	0.0108738
ADAT2	238.192	-0.289317	0.261082	-1.10815	0.267798	0.513247	0.28866
ADAT3	85.1572	-0.133131	0.247438	-0.53804	0.590549	0.776953	0.436974
ADCK1	80.3913	-0.0246605	0.305779	-0.0806479	0.935722	0.971174	0.546208
ADCK2	563.806	-0.416991	0.203629	-2.0478	0.0405796	0.173947	0.0978314
ADCK3	1336.02	-0.250735	0.152344	-1.64586	0.0997936	0.291964	0.164207
ADCK4	648.868	-0.388134	0.236767	-1.63931	0.101149	0.294589	0.165683
ADCK5	169.402	0.201402	0.278568	0.72299	0.469686	0.692103	0.389252
ADCY1	535.566	7.4e-05	0.344065	0.00021497	0.999828	0.999898	0.562363
ADCY10P1	38.4296	-1.10878	0.363593	-3.04952	0.00229209	0.0285863	0.0160775
ADCY3	2035.86	-0.355695	0.132641	-2.68163	0.00732649	0.0598567	0.0336646
ADCY6	1647.56	-0.71399	0.211724	-3.37226	0.000745537	0.0133211	0.00749207
ADCY7	1099.82	-0.710478	0.207146	-3.42985	0.000603926	0.0115143	0.00647586
ADCY9	850.001	-0.273395	0.177421	-1.54094	0.123333	0.328458	0.184731
ADCYAP1R1	180.674	1.57422	0.513152	3.06775	0.00215677	0.0273994	0.01541
ADD1	3401.77	0.0174039	0.118901	0.146373	0.883627	0.944812	0.531381
ADD2	445.801	0.443084	0.480929	0.921309	0.356889	0.599347	0.337085
ADD3	2583.23	0.0249303	0.248903	0.10016	0.920217	0.963237	0.541744
ADGRA2	339.818	-1.37531	0.380615	-3.6134	0.000302204	0.00709349	0.00398952
ADGRA3	1950.36	0.119879	0.234263	0.511729	0.608841	0.78935	0.443946
ADGRB1	41.7235	0.670203	0.698849	0.959009	0.337554	0.581643	0.327128
ADGRB2	594.719	-0.331211	0.267487	-1.23823	0.215631	0.451303	0.253822
ADGRB3	36.8642	1.22353	0.765377	1.5986	0.109909	0.308268	0.173376
ADGRD1	13.954	1.09876	0.921064	1.19292	0.232901	0.471527	0.265196
ADGRE1	230.42	0.717169	0.334236	2.1457	0.0318969	0.149658	0.0841705
ADGRE2	414.433	1.61643	0.39975	4.0436	5.26e-05	0.00193904	0.00109056
ADGRE5	3758.13	0.116649	0.216228	0.539473	0.589561	0.776508	0.436724
ADGRF1	380.018	1.3371	1.01886	1.31235	0.189401	0.420206	0.236332
ADGRG1	4545.76	0.358093	0.250987	1.42674	0.153655	0.37301	0.209789
ADGRG6	1445.81	-1.1968	0.389221	-3.07486	0.002106	0.0269937	0.0151818
ADGRL1	2613.22	-0.230597	0.292055	-0.789568	0.42978	0.659271	0.370787
ADGRL2	776.543	-0.498842	0.695823	-0.716908	0.473431	0.694748	0.39074
ADGRL3	375.042	1.23652	0.36263	3.40987	0.000649933	0.0121885	0.00685504
ADGRL4	158.131	-0.519279	0.557869	-0.930826	0.351943	0.595156	0.334728
ADGRV1	336.012	-0.216389	0.259779	-0.832974	0.404859	0.639792	0.359832
ADH5	2201.44	-0.353933	0.20186	-1.75336	0.0795409	0.257275	0.144697
ADHFE1	17.3311	0.14947	0.516947	0.289139	0.772475	0.887981	0.499418
ADI1	839.174	0.461919	0.234959	1.96596	0.0493034	0.195928	0.110194
ADIPOR1	4123.29	-0.152915	0.151041	-1.01241	0.311344	0.557277	0.313424
ADIPOR2	2492.81	-0.328715	0.0966392	-3.40147	0.000670242	0.0123889	0.00696774
ADIRF	29.7965	-0.88736	0.422268	-2.10141	0.0356047	0.160344	0.0901808
ADK	791.738	0.585221	0.302416	1.93515	0.0529718	0.203399	0.114396
ADM	166.977	0.0262995	0.476603	0.0551811	0.955994	0.981161	0.551825
ADM2	157.726	-0.60292	1.09696	-0.549627	0.582576	0.771777	0.434063
ADM5	123.932	-1.0237	0.355895	-2.87642	0.00402212	0.0407335	0.0229094
ADNP-AS1	46.2624	0.156891	0.264496	0.593168	0.553069	0.751871	0.422868
ADNP	4445.09	-0.36472	0.107041	-3.40731	0.000656069	0.0122097	0.00686698
ADNP2	1132.79	0.0319964	0.184408	0.173509	0.862252	0.936289	0.526588
ADO	1294.8	0.327517	0.269848	1.21371	0.224859	0.461224	0.259402
ADORA1	172.616	-0.221045	0.603908	-0.366025	0.714347	0.851853	0.479099
ADORA2B	483.499	0.152189	0.3184	0.47798	0.632664	0.803303	0.451794
ADPGK	1648.07	0.363067	0.160432	2.26306	0.0236318	0.124149	0.0698237
ADPRH	120.448	-0.667555	0.426787	-1.56414	0.117784	0.320093	0.180027
ADPRHL1	46.24	-0.254854	0.480543	-0.530347	0.595872	0.781015	0.439259
ADPRHL2	634.058	-0.069058	0.154081	-0.448191	0.654015	0.816237	0.459068
ADPRM	153.658	-0.620261	0.434944	-1.42607	0.153848	0.373225	0.209909
ADRA1B	14.7285	0.625974	0.872367	0.717559	0.473029	0.694448	0.390572
ADRB2	93.1272	-0.227593	0.683912	-0.332781	0.7393	0.868873	0.488671
ADRBK1	2279.46	0.0854904	0.141639	0.60358	0.546123	0.747165	0.420221
ADRBK2	29.5385	1.48675	0.855815	1.73723	0.0823462	0.262323	0.147536
ADRM1	4774.2	0.535553	0.150979	3.5472	0.000389347	0.00849515	0.00477785
ADSL	1661.61	-0.896701	0.236045	-3.79886	0.000145362	0.00416608	0.00234309
ADSS	2344.54	-0.295493	0.133345	-2.21601	0.0266907	0.133874	0.0752933
ADSSL1	106.669	0.489349	0.433638	1.12847	0.259119	0.502974	0.282883
AEBP1	2174.68	-1.76725	0.648671	-2.72442	0.00644145	0.05524	0.0310681
AEBP2	851.05	-0.152695	0.159498	-0.957352	0.33839	0.581918	0.327283
AEN	3440.37	-0.0785489	0.28712	-0.273576	0.784411	0.895139	0.503444
AES	3670.7	-0.298428	0.193082	-1.5456	0.1222	0.326987	0.183904
AFAP1-AS1	14.9936	-0.574743	0.536175	-1.07193	0.283751	0.530247	0.298222
AFAP1	5494.63	-0.99848	0.328997	-3.03492	0.00240599	0.0294179	0.0165452
AFAP1L1	556.584	-1.69663	0.373608	-4.54121	5.59e-06	0.000400757	0.000225394
AFAP1L2	902.235	-0.895438	0.701615	-1.27625	0.201866	0.435654	0.245021
AFF1	1061.42	0.0570767	0.137041	0.416492	0.67705	0.829094	0.466299
AFF2	55.5552	-0.280558	0.77625	-0.361427	0.71778	0.854432	0.48055
AFF3	187.128	0.925833	0.510519	1.81351	0.0697525	0.238225	0.133982
AFF4	4931.58	0.0385717	0.158184	0.24384	0.807354	0.90655	0.509862
AFG3L1P	346.274	-0.230345	0.196949	-1.16957	0.242173	0.483335	0.271837
AFG3L2	1878.5	-0.0526436	0.108611	-0.484698	0.62789	0.801789	0.450942
AFMID	258.596	-0.120353	0.378886	-0.317649	0.750751	0.876437	0.492926
AFTPH	928.215	-0.136294	0.234606	-0.580948	0.561276	0.757352	0.42595
AGA	760.709	0.637406	0.24374	2.6151	0.00892005	0.0680383	0.0382661
AGAP1	1119.36	-0.126864	0.141552	-0.896233	0.370128	0.610771	0.34351
AGAP11	20.3777	0.182258	0.51774	0.352026	0.724819	0.859172	0.483216
AGAP2-AS1	258.502	0.0131285	0.341322	0.0384637	0.969318	0.986039	0.554568
AGAP2	184.491	-2.34212	0.57061	-4.10459	4.05e-05	0.00162577	0.000914367
AGAP3	2727.73	-0.218222	0.183246	-1.19087	0.233705	0.472354	0.265662
AGAP4	142.769	-0.335394	0.23904	-1.40309	0.160591	0.38246	0.215103
AGAP5	36.5152	-0.837683	0.299299	-2.79882	0.00512896	0.0481954	0.0271061
AGAP6	196.876	-0.58981	0.318536	-1.85163	0.0640791	0.227178	0.127769
AGAP9	80.0757	-1.12164	0.438102	-2.56023	0.0104604	0.0754864	0.0424551
AGBL2	16.3579	-1.01163	0.452587	-2.23521	0.0254036	0.129919	0.0730691
AGBL5	999.79	-0.224648	0.221681	-1.01338	0.310878	0.55693	0.313229
AGFG1	1342.11	-0.0996148	0.128997	-0.772226	0.43998	0.667661	0.375506
AGFG2	326.75	0.160346	0.21702	0.738852	0.459997	0.684162	0.384787
AGGF1	1232.51	-0.329891	0.133351	-2.47386	0.0133664	0.0884805	0.0497632
AGK	387.771	-0.340067	0.160819	-2.11459	0.0344645	0.157408	0.0885295
AGL	820.312	-0.411617	0.173849	-2.36767	0.0179004	0.103981	0.0584812
AGMO	605.436	-0.708429	0.532427	-1.33057	0.183332	0.411986	0.231709
AGO1	2410.74	-0.241735	0.15071	-1.60397	0.10872	0.306904	0.172609
AGO2	1416.08	-0.177049	0.154581	-1.14534	0.252067	0.495014	0.278406
AGO3	451.95	-0.496791	0.161456	-3.07694	0.00209138	0.0268304	0.0150899
AGO4	403.832	-0.195815	0.289755	-0.675797	0.499169	0.71326	0.401152
AGPAT1	106.948	2.21829	0.891308	2.48881	0.0128173	0.0861811	0.04847
AGPAT2	783.001	-0.535327	0.214217	-2.49899	0.0124548	0.084908	0.047754
AGPAT3	1806.5	-0.33568	0.162566	-2.06488	0.038934	0.169427	0.0952893
AGPAT4	110.356	-1.07118	0.359881	-2.97649	0.00291568	0.0334521	0.0188141
AGPAT5	1488.19	0.184787	0.170173	1.08588	0.277533	0.524371	0.294917
AGPS	2440.25	-0.286643	0.162739	-1.76136	0.0781767	0.254434	0.143099
AGRN	10967	0.349629	0.283789	1.232	0.217949	0.453362	0.25498
AGT	92.751	2.1341	0.833575	2.56018	0.0104617	0.0754864	0.0424551
AGTPBP1	535.64	-0.139775	0.231601	-0.603515	0.546166	0.747165	0.420221
AGTRAP	566.87	0.294865	0.206288	1.42939	0.152894	0.371791	0.209103
AHCTF1	4403.58	-0.497074	0.21608	-2.30041	0.0214249	0.116163	0.0653323
AHCTF1P1	482.244	-0.255411	0.200225	-1.27562	0.202091	0.435877	0.245146
AHCY	5325.53	-0.100525	0.174608	-0.575718	0.564806	0.759969	0.427422
AHCYL1	3533.45	-0.475181	0.115643	-4.10905	3.97e-05	0.00159922	0.000899434
AHCYL2	658.104	-0.0797223	0.254047	-0.31381	0.753666	0.878353	0.494004
AHDC1	1108.93	-0.445628	0.265907	-1.67588	0.0937618	0.281915	0.158555
AHI1	533.357	0.286989	0.256244	1.11999	0.26272	0.506972	0.285131
AHNAK	25414.2	0.0314367	0.203985	0.154113	0.877521	0.942856	0.530281
AHNAK2	2427.31	1.60449	0.339681	4.72354	2.32e-06	0.000212908	0.000119744
AHR	3676.17	0.317779	0.153046	2.07637	0.0378597	0.166369	0.0935693
AHRR	1341.17	1.02607	0.338385	3.03224	0.00242747	0.0295796	0.0166362
AHSA1	2175.41	-0.435391	0.174389	-2.49666	0.0125369	0.0851771	0.0479053
AHSA2	660.96	-0.655067	0.435369	-1.50462	0.132421	0.342526	0.192644
AIDA	1289.02	-0.0253465	0.265655	-0.0954113	0.923988	0.964507	0.542458
AIF1L	1047.57	-0.168731	0.251484	-0.670941	0.502258	0.715185	0.402235
AIFM1	1571.89	0.316626	0.153471	2.06309	0.0391037	0.170062	0.0956465
AIFM2	468.685	0.430665	0.211615	2.03513	0.0418376	0.17701	0.0995539
AIG1	315.908	0.346881	0.201209	1.72399	0.0847105	0.266222	0.149729
AIM1	1151.47	-1.10859	0.357787	-3.09846	0.00194531	0.0254113	0.0142918
AIM2	721.587	1.13089	0.471723	2.39736	0.0165135	0.0995159	0.0559698
AIMP1	1144.02	0.00536219	0.134884	0.0397539	0.968289	0.985552	0.554294
AIMP2	825.139	0.0764777	0.221556	0.345184	0.729956	0.862561	0.485122
AIP	1566.08	-0.219038	0.142602	-1.53601	0.124536	0.330236	0.185732
AJAP1	148.452	-1.16526	1.11781	-1.04244	0.297205	0.543303	0.305565
AJUBA	850.123	-0.664706	0.522987	-1.27098	0.203736	0.436991	0.245773
AK1	1101.04	0.86132	0.197846	4.35349	1.34e-05	0.000736724	0.000414348
AK2	4167.62	-0.265342	0.14709	-1.80395	0.0712399	0.241058	0.135576
AK3	794.009	-0.444488	0.220222	-2.01837	0.0435531	0.181376	0.10201
AK4	1384.5	-0.20295	0.393466	-0.515802	0.605993	0.787296	0.442791
AK5	53.8305	-0.884691	1.04683	-0.845118	0.398045	0.634748	0.356995
AK6	62.5206	-0.32631	0.895354	-0.364448	0.715523	0.852891	0.479683
AK7	17.2913	0.831967	0.635492	1.30917	0.190477	0.421173	0.236876
AK8	20.0952	0.74097	0.489037	1.51516	0.129732	0.338713	0.190499
AK9	51.8853	1.65422	0.49005	3.37562	0.000736502	0.0132091	0.00742906
AKAP1	1486.78	-0.0371071	0.232963	-0.159284	0.873445	0.941563	0.529554
AKAP10	998.864	-0.105981	0.0991014	-1.06942	0.28488	0.531276	0.298801
AKAP11	2522.33	-0.401707	0.261233	-1.53773	0.124114	0.329545	0.185343
AKAP12	10210.9	-0.0316713	0.241407	-0.131195	0.895621	0.951055	0.534893
AKAP13	2794.46	0.0237789	0.22865	0.103997	0.917172	0.961784	0.540927
AKAP17A	66.1988	0.141428	0.788397	0.179387	0.857634	0.935074	0.525905
AKAP2	337.819	1.25196	0.987558	1.26774	0.204892	0.438384	0.246556
AKAP5	48.7366	-0.292394	0.400703	-0.729702	0.465573	0.689078	0.387552
AKAP6	123.03	0.603357	0.29197	2.0665	0.0387811	0.169173	0.0951462
AKAP7	107.367	-0.519595	0.219484	-2.36735	0.0179162	0.103995	0.0584887
AKAP8	1261.44	0.341372	0.138716	2.46094	0.0138573	0.0902201	0.0507416
AKAP8L	1429.87	0.221575	0.131135	1.68968	0.0910897	0.277727	0.156199
AKAP9	3370.48	-0.131068	0.163872	-0.799821	0.423814	0.654376	0.368034
AKIP1	349.491	0.0490921	0.198517	0.247294	0.804681	0.90513	0.509063
AKIRIN1	2391.91	0.31237	0.112741	2.77069	0.00559381	0.0509595	0.0286606
AKIRIN2	767.271	-0.039529	0.155438	-0.254307	0.799258	0.901946	0.507273
AKNA	286.256	-0.809399	0.332936	-2.43109	0.0150534	0.0946948	0.0532582
AKR1A1	753.797	-0.433007	0.131182	-3.30081	0.000964063	0.0158016	0.00888713
AKR1B1	2113.66	0.237987	0.206755	1.15106	0.249708	0.492474	0.276978
AKR1C1	50.712	-0.519854	0.449535	-1.15643	0.247507	0.489684	0.275408
AKR1C2	369.341	-1.51243	0.540282	-2.79933	0.00512083	0.0481822	0.0270986
AKR1C3	133.57	-0.283432	0.431452	-0.656927	0.511228	0.721524	0.4058
AKR7A2	1297.83	-0.105757	0.151462	-0.698241	0.485027	0.702064	0.394855
AKT1	2674.71	-0.0512866	0.170479	-0.300838	0.763538	0.883657	0.496987
AKT1S1	3724.86	0.284878	0.161713	1.76163	0.0781317	0.254345	0.143049
AKT2	2979.82	-0.279169	0.160027	-1.74451	0.0810703	0.260071	0.146269
AKT3	410.431	0.94833	0.510184	1.8588	0.0630552	0.225905	0.127053
AKTIP	286.063	-0.235336	0.251929	-0.934138	0.350233	0.593313	0.333691
ALAD	765.374	-0.422827	0.153506	-2.75446	0.00587883	0.0526836	0.0296303
ALAS1	1544.67	0.298484	0.174981	1.70581	0.088043	0.272319	0.153158
ALCAM	1050.83	0.611106	0.307184	1.98938	0.0466593	0.189531	0.106596
ALDH16A1	1254.37	-0.168711	0.294268	-0.573326	0.566424	0.760718	0.427843
ALDH18A1	3619.58	-0.107658	0.161868	-0.665095	0.50599	0.71826	0.403964
ALDH1A3	18066.5	-0.814774	0.255699	-3.18646	0.00144026	0.0208473	0.011725
ALDH1B1	1070.36	0.087757	0.224392	0.391088	0.695732	0.841436	0.473241
ALDH1L2	1216.29	0.0886553	0.465489	0.190456	0.848952	0.92994	0.523017
ALDH2	691.021	0.258251	0.244317	1.05703	0.290497	0.535988	0.30145
ALDH3A2	1804.82	0.122865	0.23629	0.519977	0.60308	0.785732	0.441911
ALDH3B1	485.8	0.0843204	0.37645	0.223988	0.822766	0.916193	0.515285
ALDH4A1	485.637	-0.123886	0.169663	-0.730188	0.465275	0.688851	0.387424
ALDH5A1	543.397	0.00894299	0.222871	0.0401263	0.967992	0.985499	0.554264
ALDH6A1	563.757	0.173469	0.292829	0.592391	0.553589	0.752222	0.423065
ALDH7A1	1496.06	-0.604888	0.164636	-3.6741	0.00023869	0.00591771	0.00332824
ALDH9A1	1798.83	-0.132719	0.314357	-0.42219	0.672886	0.827111	0.465184
ALDOA	22098	0.39819	0.178391	2.23213	0.0256067	0.130539	0.0734175
ALDOC	1380.82	0.786907	0.298117	2.63959	0.00830061	0.064857	0.0364769
ALG1	747.496	0.487703	0.258	1.89032	0.0587148	0.216851	0.121962
ALG10	171.894	-0.813284	0.35475	-2.29255	0.0218737	0.117798	0.066252
ALG10B	553.486	-0.665668	0.274094	-2.42861	0.015157	0.0949189	0.0533843
ALG11	262.948	-0.406965	0.2192	-1.8566	0.0633686	0.226452	0.127361
ALG12	384.627	-0.103776	0.156999	-0.660997	0.508614	0.719966	0.404924
ALG13	508.366	-0.223899	0.240777	-0.9299	0.352423	0.595628	0.334993
ALG14	147.419	0.51535	0.213867	2.40968	0.0159665	0.0976021	0.0548934
ALG1L2	23.7675	-1.03464	0.472546	-2.1895	0.0285602	0.139933	0.0787013
ALG1L9P	20.3656	-0.149136	0.672332	-0.221819	0.824455	0.916828	0.515643
ALG2	845.612	0.403294	0.228676	1.7636	0.077799	0.253787	0.142735
ALG3	1026.2	0.0498441	0.214819	0.232028	0.816516	0.912403	0.513154
ALG5	540.096	-0.4591	0.252223	-1.82022	0.0687261	0.236117	0.132797
ALG6	328.154	-0.272197	0.419868	-0.64829	0.516797	0.725038	0.407776
ALG8	1305.47	0.220317	0.12451	1.76948	0.0768145	0.252292	0.141894
ALG9	356.985	-0.193836	0.311388	-0.62249	0.53362	0.738854	0.415546
ALK	213.265	0.799601	1.00567	0.795094	0.426559	0.656672	0.369326
ALKBH1	232.955	-0.326216	0.18109	-1.80141	0.071639	0.241751	0.135966
ALKBH2	400.872	-1.25497	0.314102	-3.99542	6.46e-05	0.00229636	0.00129152
ALKBH3	410.915	0.123129	0.205782	0.598345	0.54961	0.749515	0.421543
ALKBH4	355.083	-0.206804	0.294772	-0.701574	0.482945	0.700542	0.393999
ALKBH5	2728.05	0.333691	0.145575	2.29223	0.0218926	0.117798	0.066252
ALKBH6	384.654	0.676047	0.200034	3.37966	0.000725766	0.0130959	0.00736541
ALKBH7	478.972	0.392934	0.277863	1.41413	0.157324	0.377756	0.212458
ALKBH8	1477.14	0.675726	0.586046	1.15303	0.2489	0.491354	0.276347
ALMS1-IT1	46.2294	-0.524379	0.420006	-1.2485	0.211846	0.447124	0.251472
ALMS1	1418.73	-0.674482	0.213517	-3.15891	0.00158359	0.0222478	0.0125126
ALOX12-AS1	17.4741	0.646097	0.509426	1.26828	0.204697	0.438068	0.246378
ALOX12	20.9956	0.531354	0.457471	1.1615	0.245437	0.487338	0.274089
ALOX12B	11.3132	-0.946198	0.847451	-1.11652	0.264199	0.508662	0.286082
ALOX15B	15.2574	-0.162262	0.649377	-0.249872	0.802686	0.903739	0.508281
ALPK1	465.638	0.704214	0.469432	1.50014	0.133578	0.344666	0.193847
ALPK2	82.2284	-0.765267	0.668326	-1.14505	0.252188	0.495184	0.278501
ALPK3	31.9923	-0.116426	0.428185	-0.271906	0.785694	0.895704	0.503762
ALPL	24.889	0.107343	0.615384	0.174432	0.861526	0.936289	0.526588
ALS2	659.108	0.137971	0.15979	0.863455	0.387888	0.625095	0.351566
ALS2CL	115.936	2.10961	0.94882	2.22341	0.0261882	0.132227	0.074367
ALS2CR11	118.406	0.0347493	0.39626	0.0876932	0.930121	0.967947	0.544393
ALX1	246.019	-0.17888	0.283823	-0.630254	0.528529	0.734029	0.412833
ALX3	49.0888	-0.553849	0.269181	-2.05754	0.0396347	0.171332	0.0963604
ALX4	91.7227	-0.375823	0.565637	-0.664425	0.506418	0.718655	0.404186
ALYREF	1966.12	-0.201575	0.573092	-0.351732	0.725039	0.859238	0.483253
AMACR	3754.36	-0.577354	0.862098	-0.669709	0.503044	0.716064	0.402729
AMBRA1	1246.9	0.102717	0.118312	0.868188	0.385291	0.622671	0.350203
AMD1	2353.62	0.0528273	0.2797	0.188871	0.850194	0.930788	0.523494
AMDHD2	372.16	0.396835	0.25866	1.53419	0.124982	0.331051	0.18619
AMER1	605.33	-0.239864	0.249345	-0.961977	0.336061	0.580497	0.326483
AMER2	116.221	1.83463	0.712899	2.57348	0.0100681	0.073723	0.0414633
AMFR	2345.46	0.228849	0.145931	1.5682	0.116836	0.31846	0.179108
AMH	169.951	-0.457583	0.307022	-1.49039	0.136121	0.348628	0.196076
AMIGO1	226.828	0.630954	0.262107	2.40724	0.0160738	0.0979615	0.0550955
AMIGO2	1617.39	-0.607323	0.79718	-0.761839	0.446156	0.672733	0.378359
AMIGO3	261.975	0.409633	0.209131	1.95874	0.0501433	0.197785	0.111238
AMMECR1	643.87	0.628044	0.196615	3.19428	0.00140179	0.0205185	0.01154
AMMECR1L	1109.04	0.00519979	0.116385	0.0446774	0.964364	0.984145	0.553503
AMN1	96.3216	-0.732781	0.349567	-2.09625	0.0360599	0.161028	0.0905653
AMOT	1525.99	-0.324275	0.364868	-0.888746	0.37414	0.613278	0.34492
AMOTL1	14814.1	0.0170081	0.357405	0.0475878	0.962045	0.983527	0.553156
AMOTL2	2117.18	-0.448554	0.583096	-0.769262	0.441738	0.669149	0.376343
AMPD2	2134.37	0.252977	0.152342	1.66058	0.0967976	0.28683	0.161319
AMPD3	98.9214	0.991722	0.491622	2.01725	0.0436699	0.1815	0.102079
AMPH	25.8383	2.91526	1.0457	2.78785	0.00530587	0.0492761	0.0277139
AMT	37.841	-1.05397	0.540163	-1.9512	0.051033	0.199482	0.112193
AMY2B	43.2143	1.33649	0.726917	1.83858	0.0659771	0.230769	0.129789
AMZ2	1741.8	0.616823	0.160711	3.83809	0.000123993	0.003665	0.00206127
AMZ2P1	111.037	0.362055	0.268105	1.35042	0.176881	0.403615	0.227001
ANAPC1	1335.19	-0.306562	0.180057	-1.70258	0.0886461	0.273124	0.15361
ANAPC10	180.641	0.0100328	0.340859	0.029434	0.976518	0.98929	0.556397
ANAPC11	778.092	0.148691	0.227011	0.654995	0.512471	0.722064	0.406104
ANAPC13	1115.38	0.254011	0.155607	1.63238	0.102599	0.296794	0.166923
ANAPC15	546.866	0.619874	0.208728	2.96977	0.00298026	0.0338315	0.0190275
ANAPC16	827.991	0.0674699	0.107077	0.630108	0.528624	0.734029	0.412833
ANAPC2	863.786	0.236611	0.125775	1.88122	0.059942	0.219069	0.123209
ANAPC4	511.28	-0.517855	0.230419	-2.24745	0.0246114	0.127414	0.0716602
ANAPC5	3378.47	0.034643	0.130691	0.265074	0.790952	0.898201	0.505166
ANAPC7	1257.46	-0.282176	0.193214	-1.46043	0.144172	0.359553	0.20222
ANG	42.6168	0.762964	0.533417	1.43033	0.152621	0.371445	0.208908
ANGEL1	618.529	0.20248	0.160445	1.26199	0.206953	0.441184	0.248131
ANGEL2	1029.58	-0.457705	0.130468	-3.50818	0.000451191	0.00939763	0.00528542
ANGPT1	293.671	-0.0986274	0.186519	-0.52878	0.596958	0.781816	0.439709
ANGPTL1	21.4699	-0.536326	0.700555	-0.765574	0.44393	0.671116	0.377449
ANGPTL2	1272.54	0.401845	0.358492	1.12093	0.262317	0.50681	0.28504
ANGPTL4	403.888	2.02945	0.780943	2.59872	0.00935721	0.0701668	0.0394632
ANK1	43.3848	0.602191	0.469961	1.28137	0.200065	0.433727	0.243937
ANK2	442.148	0.0479609	0.2108	0.227519	0.82002	0.914466	0.514314
ANK3	1328.75	1.08374	0.283821	3.81839	0.000134324	0.00393631	0.00221386
ANKAR	33.7089	-0.39078	0.350783	-1.11402	0.265269	0.509627	0.286625
ANKDD1A	59.2625	-0.215486	0.30686	-0.70223	0.482535	0.700226	0.393821
ANKEF1	137.258	-1.20675	0.428337	-2.81729	0.00484304	0.046474	0.0261379
ANKFN1	37.5857	0.213571	0.581439	0.367315	0.713384	0.851403	0.478846
ANKFY1	2430.51	-0.04281	0.157326	-0.27211	0.785537	0.895657	0.503736
ANKH	9722.45	-0.337445	0.444552	-0.759067	0.447812	0.673805	0.378962
ANKHD1-EIF4EBP3	2100.83	-0.0737132	0.19342	-0.381105	0.703126	0.845333	0.475433
ANKHD1	1120.72	-0.552524	0.595962	-0.927114	0.353867	0.597	0.335765
ANKIB1	1719.62	-0.899887	0.154985	-5.80627	6.39e-09	1.94e-06	1.09e-06
ANKLE1	138.608	-1.2293	0.555598	-2.21257	0.026927	0.134624	0.0757151
ANKLE2	1483.5	-0.150809	0.284933	-0.529279	0.596612	0.781672	0.439628
ANKMY1	191.671	-0.243838	0.190623	-1.27916	0.20084	0.434881	0.244586
ANKMY2	321.695	0.20671	0.254035	0.813706	0.415814	0.648238	0.364582
ANKRA2	332.217	-0.0449124	0.297716	-0.150857	0.880089	0.943826	0.530827
ANKRD1	523.236	0.538442	1.41191	0.381356	0.702939	0.845202	0.475359
ANKRD10	1158.18	-0.344414	0.283804	-1.21356	0.224915	0.461224	0.259402
ANKRD11	7468.19	0.111768	0.180316	0.619846	0.535359	0.740083	0.416237
ANKRD12	1115.26	0.178669	0.294423	0.606844	0.543955	0.745279	0.41916
ANKRD13A	1016.44	0.164445	0.204986	0.802226	0.422422	0.653806	0.367714
ANKRD13B	591.557	-0.842119	0.302157	-2.78703	0.00531943	0.0493701	0.0277667
ANKRD13C	730.504	0.152677	0.187339	0.814974	0.415087	0.64817	0.364544
ANKRD13D	884.519	0.400762	0.370755	1.08093	0.279727	0.526947	0.296366
ANKRD16	189.672	-0.233763	0.242551	-0.96377	0.335161	0.580266	0.326353
ANKRD17	3770.51	-0.404737	0.166926	-2.42465	0.015323	0.095552	0.0537404
ANKRD18A	160.861	-0.999451	0.346356	-2.88562	0.00390644	0.0401285	0.0225691
ANKRD18B	250.095	-0.653082	0.361985	-1.80417	0.071205	0.241058	0.135576
ANKRD19P	22.0998	0.382689	0.403282	0.948936	0.342653	0.585805	0.329469
ANKRD20A12P	15.8699	0.0705073	0.604694	0.1166	0.907177	0.957279	0.538393
ANKRD23	54.286	-0.251821	0.380463	-0.661881	0.508048	0.71947	0.404645
ANKRD24	34.8241	-0.226956	0.498089	-0.455653	0.64864	0.81388	0.457742
ANKRD26	434.982	-0.123576	0.179555	-0.688237	0.491303	0.706511	0.397356
ANKRD27	936.894	-0.434417	0.25137	-1.7282	0.0839523	0.265337	0.149231
ANKRD28	1881.78	-0.425363	0.300391	-1.41603	0.156767	0.376813	0.211927
ANKRD29	114.631	0.273559	0.401768	0.680889	0.495942	0.710329	0.399504
ANKRD30A	12.6733	-2.27729	1.98651	-1.14638	0.251639	0.494716	0.278238
ANKRD30B	33.3954	1.46071	1.69571	0.861412	0.389011	0.62593	0.352036
ANKRD30BP2	38.2889	2.30507	1.02531	2.24817	0.0245653	0.127221	0.0715517
ANKRD31	26.5986	1.25142	0.387052	3.23322	0.00122403	0.0186599	0.0104947
ANKRD33B	356.818	-0.942824	1.02771	-0.917406	0.35893	0.601153	0.338101
ANKRD34A	359.37	-0.634403	0.292855	-2.16627	0.0302906	0.14464	0.0813484
ANKRD36	196.744	-0.444604	0.312255	-1.42385	0.154491	0.373653	0.21015
ANKRD36B	105.309	-0.671387	0.33533	-2.00217	0.0452665	0.186185	0.104714
ANKRD36BP1	1119.32	0.780246	0.349274	2.23391	0.0254892	0.13013	0.073188
ANKRD36C	204.367	-0.685369	0.349968	-1.95837	0.0501863	0.197842	0.11127
ANKRD37	74.2754	0.69162	0.469451	1.47325	0.140683	0.355177	0.199759
ANKRD39	177.601	-0.130326	0.274598	-0.474608	0.635067	0.805004	0.45275
ANKRD40	1964.57	-0.081366	0.146607	-0.554994	0.578899	0.769323	0.432683
ANKRD42	621.825	0.120087	0.238372	0.503781	0.614416	0.792491	0.445713
ANKRD44	115.165	-0.8319	0.314474	-2.64537	0.00816018	0.0641797	0.0360959
ANKRD45	32.8947	-1.14397	0.725245	-1.57736	0.114713	0.314909	0.177111
ANKRD46	250.037	0.317303	0.248324	1.27778	0.201327	0.435101	0.244709
ANKRD49	224.566	0.205091	0.289257	0.709024	0.478309	0.697391	0.392227
ANKRD50	4049.83	-0.29426	0.285986	-1.02893	0.303511	0.549572	0.30909
ANKRD52	5598.94	0.0818356	0.157733	0.518824	0.603884	0.785989	0.442056
ANKRD54	824.852	0.107076	0.157087	0.681637	0.495469	0.710207	0.399435
ANKRD55	29.0113	-0.499345	0.519244	-0.961678	0.336212	0.580497	0.326483
ANKRD6	144.56	1.66569	0.451076	3.69271	0.000221877	0.00570825	0.00321044
ANKRD61	17.0718	-0.520646	0.428833	-1.2141	0.22471	0.461067	0.259313
ANKRD9	163.846	0.110548	0.266167	0.415333	0.677898	0.8295	0.466528
ANKS1A	603.469	-1.06023	0.204393	-5.18721	2.13e-07	3.44e-05	1.93e-05
ANKS1B	118.253	2.83523	0.924471	3.06687	0.00216314	0.0274317	0.0154281
ANKS3	207.898	-1.3063	0.343308	-3.80503	0.000141785	0.00407987	0.0022946
ANKS6	820.319	-1.0729	0.314882	-3.40732	0.000656041	0.0122097	0.00686698
ANKZF1	551.073	-0.161681	0.248237	-0.651319	0.51484	0.723939	0.407158
ANLN	3444.9	-1.08181	0.743482	-1.45506	0.145654	0.361321	0.203214
ANO1-AS2	29.4434	-0.690325	0.43689	-1.58009	0.114087	0.314155	0.176687
ANO1	546.167	-1.05605	0.938139	-1.12569	0.260298	0.50454	0.283764
ANO10	578.464	0.23514	0.204799	1.14815	0.250907	0.493683	0.277657
ANO3	58.68	-0.243075	0.468543	-0.51879	0.603907	0.785989	0.442056
ANO4	76.547	-1.43415	0.765799	-1.87275	0.0611033	0.221727	0.124704
ANO5	22.8125	-0.0261588	0.456714	-0.0572761	0.954325	0.980321	0.551352
ANO6	1853.16	-0.758757	0.18152	-4.18002	2.91e-05	0.00127795	0.000718747
ANO7	31.1521	-0.733814	0.33185	-2.21128	0.0270162	0.134893	0.0758665
ANO8	686.102	-0.208434	0.212624	-0.980296	0.32694	0.572815	0.322163
ANOS1	13.7105	0.746001	0.705114	1.05799	0.290061	0.535695	0.301286
ANP32A-IT1	69.7365	-0.360863	0.413742	-0.872193	0.383103	0.620674	0.34908
ANP32A	3566.59	-0.198821	0.214677	-0.926141	0.354372	0.597142	0.335845
ANP32B	4674.82	-0.436646	0.24262	-1.79971	0.0719063	0.24202	0.136117
ANP32E	2558.95	-0.396976	0.297006	-1.33659	0.181356	0.409654	0.230398
ANPEP	4402.81	0.120819	0.380922	0.317175	0.751111	0.876541	0.492985
ANTXR1	1122.92	-1.77731	0.36592	-4.8571	1.19e-06	0.000127382	7.16e-05
ANTXR2	691.741	0.245935	0.21372	1.15074	0.24984	0.492599	0.277048
ANXA1	11967.1	-0.436388	0.231057	-1.88866	0.0589377	0.217281	0.122203
ANXA11	3133.15	-0.345115	0.164368	-2.09965	0.0357599	0.160592	0.0903204
ANXA2	10582.6	0.316715	0.27567	1.14889	0.2506	0.493146	0.277356
ANXA2P2	683.538	0.755765	0.455775	1.6582	0.0972772	0.287835	0.161884
ANXA2R	30.0304	-0.425682	0.596284	-0.71389	0.475295	0.69575	0.391304
ANXA4	717.345	-0.182395	0.272753	-0.668717	0.503676	0.71655	0.403002
ANXA5	4833.19	-0.0106199	0.146369	-0.0725556	0.94216	0.973898	0.54774
ANXA6	1776.06	0.0232424	0.314919	0.0738044	0.941166	0.973681	0.547618
ANXA7	1371.97	0.339617	0.131399	2.58463	0.00974847	0.0720823	0.0405406
ANXA9	91.9629	-0.354137	0.480199	-0.73748	0.460831	0.685031	0.385275
AOC2	44.7686	-0.259417	0.50592	-0.512762	0.608118	0.788698	0.44358
AOC3	30.7736	-0.207684	0.55982	-0.370983	0.71065	0.850262	0.478205
AOX1	21.3047	-0.543643	0.568592	-0.956122	0.339011	0.582504	0.327612
AP1AR	394.102	-0.379647	0.234115	-1.62162	0.104884	0.300767	0.169157
AP1B1	3041.31	-0.168743	0.166658	-1.01251	0.311293	0.557277	0.313424
AP1G1	3399.68	0.178301	0.132009	1.35067	0.1768	0.403595	0.22699
AP1G2	421.903	0.0042073	0.346275	0.0121502	0.990306	0.995635	0.559965
AP1M1	2826.39	-0.342953	0.190227	-1.80286	0.0714104	0.241452	0.135797
AP1M2	31.8067	-0.112834	1.08245	-0.10424	0.916979	0.961744	0.540904
AP1S1	2939.38	0.0671463	0.149785	0.448286	0.653947	0.816237	0.459068
AP1S2	2037.04	0.726195	0.345835	2.09983	0.0357437	0.160592	0.0903204
AP1S3	211.559	0.767586	0.269397	2.84927	0.00438192	0.0433353	0.0243727
AP2A1	3066.99	-0.161167	0.132473	-1.21661	0.223754	0.459829	0.258617
AP2A2	267.316	0.211222	0.36319	0.581573	0.560854	0.757106	0.425812
AP2B1	6886.17	-0.384008	0.199386	-1.92595	0.0541104	0.206114	0.115923
AP2M1	6277.42	0.357652	0.119945	2.9818	0.00286562	0.0330631	0.0185953
AP2S1	2982.05	-0.027987	0.225742	-0.123978	0.901333	0.954061	0.536583
AP3B1	2168.73	-0.02236	0.119187	-0.187604	0.851187	0.93123	0.523742
AP3B2	139.368	0.476033	0.53901	0.883161	0.377149	0.615634	0.346245
AP3D1	4253.56	-0.0439275	0.135035	-0.325306	0.74495	0.87265	0.490796
AP3M1	1300.16	-0.00645155	0.0862043	-0.0748402	0.940342	0.973482	0.547506
AP3M2	420.253	-0.196497	0.199224	-0.986315	0.323979	0.570206	0.320695
AP3S1	1739.93	-0.00963919	0.353106	-0.0272983	0.978222	0.989929	0.556756
AP3S2	923.153	-0.499632	0.197221	-2.53337	0.0112973	0.0795922	0.0447643
AP4B1-AS1	24.831	-0.31216	0.505312	-0.617757	0.536735	0.74052	0.416483
AP4B1	463.068	0.0280382	0.188635	0.148638	0.88184	0.944522	0.531218
AP4E1	721.172	-0.14715	0.217868	-0.67541	0.499415	0.713321	0.401186
AP4M1	433.081	-0.00412359	0.193342	-0.021328	0.982984	0.991843	0.557833
AP4S1	96.0629	-0.0495214	0.3056	-0.162046	0.871269	0.940606	0.529016
AP5B1	1926.6	0.379778	0.214553	1.77009	0.076712	0.252054	0.14176
AP5M1	316.435	-0.279801	0.118279	-2.3656	0.0180008	0.104048	0.0585189
AP5S1	391.44	0.185474	0.165553	1.12033	0.262573	0.506893	0.285087
AP5Z1	671.959	0.454325	0.229521	1.97945	0.047765	0.192106	0.108044
APAF1	1079.84	0.0155351	0.35541	0.0437104	0.965135	0.984369	0.553629
APBA2	154.325	0.049316	0.66774	0.0738551	0.941126	0.973681	0.547618
APBA3	303.689	0.0608085	0.201873	0.301221	0.763246	0.883466	0.496879
APBB1	698.285	0.638166	0.206637	3.08834	0.00201278	0.026126	0.0146938
APBB2	609.797	-0.500384	0.310098	-1.61363	0.106608	0.303353	0.170612
APBB3	379.404	0.299628	0.252903	1.18475	0.236115	0.475347	0.267345
APC	2146.63	-0.0160055	0.150807	-0.106132	0.915477	0.960979	0.540474
APC2	334.998	0.0939839	0.376853	0.249392	0.803058	0.903921	0.508383
APEH	2437.54	-0.238729	0.257664	-0.926512	0.35418	0.597142	0.335845
APEX1	2481.86	-0.00868192	0.147359	-0.0589168	0.953018	0.979962	0.551151
APEX2	888.675	-0.529368	0.212337	-2.49306	0.0126648	0.085647	0.0481696
APH1A	2922.06	-0.30035	0.144593	-2.0772	0.037783	0.166275	0.0935165
APH1B	150.327	0.563768	0.244512	2.30569	0.0211281	0.115093	0.0647308
API5	2922.55	-0.0740809	0.170443	-0.434637	0.663826	0.821661	0.462119
APIP	639.244	0.0704704	0.155288	0.453805	0.64997	0.814522	0.458104
APITD1-CORT	56.303	-0.0139073	0.406656	-0.0341993	0.972718	0.987675	0.555488
APITD1	411.831	-0.166597	0.239248	-0.696334	0.48622	0.70301	0.395387
APLF	39.3051	1.79647	0.725069	2.47765	0.0132251	0.0878065	0.0493841
APLN	45.8484	0.301591	0.900415	0.334946	0.737666	0.867806	0.488072
APLP1	1057.61	2.16455	0.44763	4.83557	1.33e-06	0.000138869	7.81e-05
APLP2	6605.71	-0.236733	0.294048	-0.805083	0.420772	0.652687	0.367084
APMAP	3404.12	0.151897	0.142995	1.06225	0.288121	0.534193	0.300441
APOA1BP	2272.27	0.0724248	0.153637	0.471404	0.637352	0.806469	0.453574
APOBEC3B	334.521	-0.525815	0.475081	-1.10679	0.268385	0.513754	0.288946
APOBEC3C	848.613	0.332117	0.184785	1.79732	0.072285	0.242421	0.136343
APOBEC3D	185.67	-0.537867	0.363379	-1.48018	0.138825	0.352299	0.19814
APOBEC3F	357.51	0.287424	0.311759	0.921941	0.356559	0.599122	0.336958
APOBEC3G	670.391	0.346135	0.461576	0.749899	0.453316	0.678506	0.381605
APOBEC3H	22.8681	0.814356	0.467768	1.74094	0.0816945	0.261196	0.146902
APOC1	59.0877	-0.577919	0.423875	-1.36342	0.172751	0.397927	0.223802
APOD	335.715	0.886261	0.617931	1.43424	0.151504	0.369807	0.207987
APOE	425.133	0.516224	0.815659	0.632893	0.526804	0.732709	0.41209
APOL1	180.755	1.0042	0.540969	1.8563	0.0634103	0.226482	0.127378
APOL2	646.181	1.24496	0.381064	3.26707	0.00108668	0.0172831	0.00972039
APOL3	43.2068	0.00465037	0.44721	0.0103986	0.991703	0.996222	0.560295
APOL6	740.046	-0.386138	0.327573	-1.17879	0.238484	0.478499	0.269117
APOLD1	199.097	1.27905	0.52117	2.4542	0.01412	0.0913083	0.0513536
APOO	489.386	0.0375726	0.158192	0.237513	0.812259	0.909932	0.511764
APOOL	781.83	0.101815	0.212346	0.479476	0.6316	0.802687	0.451447
APOPT1	348.479	-0.0258479	0.224529	-0.115121	0.908349	0.957439	0.538483
APP	13789	0.0316061	0.176538	0.179032	0.857912	0.935094	0.525916
APPBP2	1017.86	0.0661043	0.147924	0.446881	0.654961	0.816758	0.459361
APPL1	1337.56	-0.565145	0.227267	-2.4867	0.0128933	0.0864987	0.0486486
APPL2	1042.9	-0.11756	0.336111	-0.349766	0.726514	0.860285	0.483841
APRT	2219.26	0.37112	0.220159	1.6857	0.0918545	0.279049	0.156943
APTR	75.9119	-0.276184	0.333758	-0.827499	0.407954	0.642171	0.36117
APTX	677.676	0.0487624	0.146934	0.331867	0.73999	0.86912	0.488811
AQP1	137.827	0.884994	0.664825	1.33117	0.183133	0.411784	0.231596
AQP11	32.2705	-0.286572	0.346214	-0.827733	0.407822	0.642129	0.361146
AQP3	295.191	1.11052	0.548791	2.02357	0.0430149	0.180235	0.101368
AQP4	226.317	2.08491	0.954505	2.18428	0.0289416	0.14097	0.0792843
AQP7P1	44.2168	-0.913949	0.599899	-1.52351	0.127632	0.33516	0.188501
AQP7P3	55.2301	-0.0642761	0.589375	-0.109058	0.913156	0.95979	0.539805
AQR	1418.03	-0.912868	0.329038	-2.77435	0.00553115	0.0505921	0.028454
AR	243.035	-0.487342	0.450014	-1.08295	0.278832	0.525814	0.295728
ARAF	1700.68	0.0254392	0.146349	0.173826	0.862002	0.936289	0.526588
ARAP1	2758.6	0.107173	0.223277	0.48	0.631228	0.802687	0.451447
ARAP2	372.694	-0.394959	0.236797	-1.66792	0.0953317	0.284961	0.160268
ARAP3	1578.4	-0.326079	0.295009	-1.10532	0.269021	0.51436	0.289286
ARC	58.4515	0.579655	0.549022	1.0558	0.291062	0.536269	0.301609
ARCN1	8281.61	0.170998	0.144739	1.18142	0.237436	0.47727	0.268426
AREG	607.768	2.81445	1.04442	2.69475	0.00704408	0.058483	0.032892
AREL1	1147	-0.384649	0.212742	-1.80806	0.0705979	0.239812	0.134875
ARF1	11726.6	0.228791	0.096414	2.373	0.0176441	0.103264	0.058078
ARF3	5548.05	0.186938	0.111574	1.67547	0.0938425	0.282098	0.158658
ARF4	4308.59	0.555289	0.13311	4.17165	3.02e-05	0.00129835	0.000730218
ARF5	1470.99	-0.00778863	0.315645	-0.0246753	0.980314	0.990976	0.557345
ARF6	2402.52	-0.145629	0.113039	-1.28831	0.197638	0.430418	0.242076
ARFGAP1	3212.47	0.515635	0.136861	3.76758	0.000164837	0.00458664	0.00257962
ARFGAP2	1897.38	0.150541	0.125969	1.19507	0.232061	0.470691	0.264726
ARFGAP3	814.455	0.122873	0.328708	0.373807	0.708548	0.84876	0.47736
ARFGEF1	1556.91	-0.697895	0.196652	-3.54889	0.000386862	0.0084748	0.0047664
ARFGEF2	3249.71	-0.0952437	0.135814	-0.70128	0.483129	0.700661	0.394066
ARFGEF3	231.217	0.868644	0.543251	1.59897	0.109826	0.308167	0.17332
ARFIP1	663.175	-0.229358	0.211107	-1.08646	0.277278	0.524125	0.294778
ARFIP2	1654.14	0.426467	0.207233	2.05791	0.0395992	0.171246	0.0963122
ARFRP1	806.012	0.0370174	0.195521	0.189327	0.849836	0.930696	0.523442
ARG2	335.275	0.0167377	0.230535	0.0726035	0.942122	0.973898	0.54774
ARGLU1	1583.94	-0.428557	0.287653	-1.48984	0.136267	0.348714	0.196124
ARHGAP1	2066.23	-0.515313	0.233828	-2.20381	0.0275374	0.136828	0.0769546
ARHGAP10	286.619	-0.663694	0.298477	-2.2236	0.0261753	0.132227	0.074367
ARHGAP11A	208.883	-0.43249	0.575248	-0.751832	0.452152	0.677047	0.380785
ARHGAP12	2420.8	-0.18493	0.407788	-0.453495	0.650192	0.814588	0.45814
ARHGAP17	1089.6	-0.400184	0.198172	-2.01938	0.0434476	0.18132	0.101978
ARHGAP18	658.924	-0.564306	0.382408	-1.47566	0.140034	0.354192	0.199205
ARHGAP19	1300.95	0.277652	0.157005	1.76843	0.0769889	0.252692	0.142119
ARHGAP21	1996.87	0.459979	0.188573	2.43926	0.0147173	0.0934008	0.0525305
ARHGAP22	115.393	0.31984	0.303048	1.05541	0.291238	0.536364	0.301662
ARHGAP23	284.298	-0.272461	0.38384	-0.709828	0.477811	0.69704	0.39203
ARHGAP24	212.481	0.896625	0.305105	2.93874	0.00329551	0.0358578	0.0201671
ARHGAP25	40.8586	-0.315522	0.549411	-0.574292	0.56577	0.760481	0.42771
ARHGAP26	637.811	-1.13001	0.359747	-3.14113	0.00168298	0.0230786	0.0129799
ARHGAP28	36.5754	1.75817	0.559242	3.14385	0.0016674	0.022997	0.012934
ARHGAP29	283.509	0.36463	0.606599	0.601105	0.54777	0.748253	0.420833
ARHGAP30	105.463	0.631221	0.432881	1.45819	0.144789	0.360389	0.20269
ARHGAP31	1191.93	0.0312737	0.424001	0.0737586	0.941202	0.973681	0.547618
ARHGAP32	1463.36	0.289765	0.309778	0.935396	0.349584	0.592565	0.333271
ARHGAP33	166.571	-0.891685	0.307913	-2.8959	0.00378075	0.039431	0.0221768
ARHGAP35	5233.43	0.416739	0.207194	2.01135	0.0442883	0.183372	0.103132
ARHGAP39	378.353	0.160672	0.187008	0.859174	0.390244	0.62728	0.352795
ARHGAP4	1016.77	-0.485584	0.279636	-1.73648	0.0824784	0.262356	0.147554
ARHGAP42	107.866	-0.5159	0.434888	-1.18628	0.235511	0.474332	0.266774
ARHGAP44	182.983	0.669668	0.424428	1.57781	0.114609	0.314909	0.177111
ARHGAP5-AS1	448.636	0.796762	0.375777	2.1203	0.0339804	0.155913	0.0876884
ARHGAP5	3834.51	0.0663898	0.253899	0.261481	0.793722	0.899319	0.505795
ARHGAP9	42.1009	-0.23712	0.593742	-0.399366	0.689624	0.836775	0.470619
ARHGDIA	8348.41	0.198303	0.144561	1.37177	0.170136	0.394506	0.221878
ARHGDIB	27.3018	-0.891674	0.731749	-1.21855	0.223014	0.458946	0.25812
ARHGDIG	29.1394	-0.444563	0.556572	-0.798753	0.424433	0.654497	0.368102
ARHGEF1	2867.85	-1.14617	0.304626	-3.76253	0.000168202	0.00465315	0.00261703
ARHGEF10	47.5195	-0.656325	0.802324	-0.81803	0.41334	0.646469	0.363587
ARHGEF10L	269.065	0.177531	0.412286	0.430601	0.666758	0.823322	0.463053
ARHGEF11	4188.98	0.108886	0.162905	0.668403	0.503877	0.716609	0.403035
ARHGEF12	4360.47	-0.185771	0.196797	-0.943973	0.345183	0.588543	0.331008
ARHGEF17	737.614	0.586672	0.287446	2.04098	0.0412524	0.175557	0.0987365
ARHGEF18	1425.49	-0.0471244	0.226011	-0.208505	0.834835	0.922423	0.518789
ARHGEF19	188.163	-0.782997	0.408091	-1.91868	0.0550247	0.208213	0.117103
ARHGEF2	4825.3	-0.778888	0.355082	-2.19354	0.0282682	0.139013	0.0781835
ARHGEF25	677.581	-0.293309	0.269137	-1.08981	0.275795	0.52254	0.293887
ARHGEF28	533.549	-0.9388	0.494339	-1.8991	0.057551	0.214342	0.12055
ARHGEF3	355.749	0.0769892	0.368562	0.20889	0.834534	0.922363	0.518755
ARHGEF37	447.687	2.13643	0.474161	4.5057	6.62e-06	0.000452775	0.00025465
ARHGEF39	324.341	-1.03354	0.470986	-2.19443	0.0282048	0.138858	0.0780967
ARHGEF4	193.234	0.203432	0.401297	0.506936	0.6122	0.791342	0.445067
ARHGEF40	1960.46	0.0915063	0.286155	0.319779	0.749136	0.875431	0.49236
ARHGEF6	539.029	-0.819399	0.354488	-2.3115	0.0208054	0.114099	0.0641718
ARHGEF7	1730.46	-0.291538	0.14986	-1.9454	0.0517269	0.200785	0.112925
ARHGEF9	808.283	0.644776	0.233783	2.75801	0.00581549	0.0522872	0.0294074
ARID1A	4667.4	-0.401715	0.107157	-3.74884	0.000177657	0.00479439	0.00269646
ARID1B	2058.19	-0.209709	0.08649	-2.42466	0.0153225	0.095552	0.0537404
ARID2	1252.9	-0.525178	0.213321	-2.46192	0.0138197	0.0901806	0.0507194
ARID3A	130.628	-0.367219	0.438952	-0.836581	0.402828	0.638624	0.359175
ARID3B	79.3853	-1.67648	0.616044	-2.72136	0.00650141	0.0555878	0.0312637
ARID4A	430.774	-0.112768	0.275978	-0.408612	0.682824	0.832359	0.468136
ARID4B	1997.23	0.00398508	0.169758	0.0234751	0.981271	0.991058	0.557391
ARID5A	131.686	0.106345	0.495472	0.214634	0.830053	0.920272	0.51758
ARID5B	835.281	-0.22977	0.248843	-0.923354	0.355823	0.598767	0.336759
ARIH1	1896.27	-0.185154	0.108352	-1.70882	0.0874848	0.271542	0.152721
ARIH2	2516.86	0.0395285	0.11612	0.34041	0.733548	0.865146	0.486576
ARIH2OS	34.66	0.517477	0.371539	1.39279	0.163682	0.386443	0.217343
ARL1	1793.47	0.585953	0.208471	2.81072	0.00494311	0.0470663	0.026471
ARL10	48.1457	-1.05694	0.557906	-1.89448	0.0581614	0.215802	0.121371
ARL13B	502.781	-0.219343	0.177023	-1.23906	0.215322	0.451039	0.253674
ARL14EP	494.584	0.263764	0.209229	1.26065	0.207437	0.441821	0.248489
ARL14EPL	36.805	1.20905	0.670664	1.80277	0.0714246	0.241452	0.135797
ARL15	439.794	0.0754388	0.355372	0.212282	0.831887	0.921421	0.518226
ARL16	529.38	0.197329	0.163099	1.20987	0.226329	0.463062	0.260436
ARL17A	53.448	-0.740086	0.374208	-1.97774	0.0479585	0.192506	0.108269
ARL2-SNX15	4.62094	-0.966576	1.97087	-0.490431	0.623829	0.798638	0.44917
ARL2	1525.7	-0.308763	0.184121	-1.67696	0.0935511	0.281518	0.158331
ARL2BP	1430.12	0.276556	0.14698	1.88159	0.0598916	0.21894	0.123136
ARL3	694.01	0.248542	0.18863	1.31761	0.187633	0.417901	0.235036
ARL4A	297.698	0.240561	0.583665	0.412157	0.680225	0.830999	0.467371
ARL4C	675.971	0.389583	0.347893	1.11984	0.262784	0.506987	0.285139
ARL4D	171.219	-0.163997	0.46171	-0.355195	0.722444	0.857845	0.482469
ARL5A	681.324	-0.0531545	0.198598	-0.267649	0.788969	0.897367	0.504698
ARL5B	599.778	-0.243255	0.156305	-1.55628	0.119641	0.323121	0.18173
ARL6	163.395	-0.234685	0.348883	-0.672675	0.501154	0.714494	0.401846
ARL6IP1	3314.63	-0.227895	0.213523	-1.06731	0.285833	0.532292	0.299372
ARL6IP4	1758.94	-0.539312	0.187048	-2.88327	0.00393567	0.040265	0.0226459
ARL6IP5	1702.02	0.53843	0.241922	2.22563	0.0260389	0.131991	0.0742342
ARL6IP6	288.175	-0.246371	0.287711	-0.856311	0.391826	0.628623	0.35355
ARL8A	660.705	-0.242464	0.284329	-0.852757	0.393794	0.630677	0.354705
ARL8B	1469.99	0.333263	0.161841	2.0592	0.0394754	0.171082	0.0962201
ARMC1	1066.77	-0.282953	0.263594	-1.07344	0.283072	0.529776	0.297957
ARMC10	498.807	-0.449984	0.183958	-2.44613	0.0144401	0.0923084	0.0519161
ARMC2	39.7915	0.0611443	0.384867	0.158871	0.873771	0.941609	0.52958
ARMC4	15.0475	0.405238	2.38489	0.169919	0.865074	0.937425	0.527227
ARMC5	816.885	0.103121	0.11858	0.869631	0.384502	0.622097	0.34988
ARMC6	1903.56	-0.00289179	0.234654	-0.0123236	0.990167	0.995635	0.559965
ARMC7	285.623	-0.783785	0.365521	-2.14429	0.0320093	0.1499	0.0843068
ARMC8	757.442	0.110509	0.131675	0.839261	0.401323	0.637225	0.358388
ARMC9	737.089	0.09699	0.14351	0.67584	0.499142	0.71326	0.401152
ARMCX3	685.748	0.324509	0.209985	1.54539	0.122252	0.326987	0.183904
ARMCX4	201.087	0.71598	0.699389	1.02372	0.305967	0.551811	0.31035
ARMCX5-GPRASP2	160.442	0.414985	0.502064	0.826558	0.408488	0.642431	0.361316
ARMCX5	239.936	0.0642497	0.198602	0.32351	0.746309	0.8736	0.49133
ARMCX6	197.669	0.819854	0.402566	2.03657	0.0416933	0.176571	0.0993072
ARMT1	474.319	-0.236722	0.12445	-1.90216	0.0571508	0.21344	0.120043
ARNT	1159.74	-0.123367	0.208832	-0.590748	0.554689	0.752668	0.423316
ARNT2	4731.07	-0.567466	0.381708	-1.48665	0.137107	0.350036	0.196867
ARNTL	245.364	0.437669	0.263288	1.66232	0.0964477	0.28603	0.160869
ARNTL2	512.558	0.447999	0.478208	0.936829	0.348847	0.591968	0.332935
ARPC1A	3239.27	0.0387791	0.163379	0.237357	0.81238	0.909932	0.511764
ARPC1B	5262.83	0.124669	0.205779	0.60584	0.544621	0.745723	0.41941
ARPC2	3914.7	0.271506	0.166746	1.62826	0.103471	0.297978	0.167589
ARPC3	3126.78	-0.22598	0.164929	-1.37016	0.170636	0.39521	0.222274
ARPC4	3389.77	0.568446	0.129861	4.37735	1.2e-05	0.000677734	0.000381171
ARPC5	3665.81	0.0672338	0.158754	0.42351	0.671923	0.826637	0.464917
ARPC5L	1369.18	0.321808	0.138257	2.32762	0.0199325	0.111274	0.0625827
ARPIN	1033.77	-0.452664	0.263642	-1.71696	0.0859858	0.268741	0.151145
ARPP19	4209.23	-0.218938	0.186458	-1.17419	0.240319	0.480838	0.270433
ARPP21	190.186	-0.412356	0.490287	-0.841049	0.40032	0.636462	0.357959
ARRB1	463.407	-0.913636	0.371735	-2.45776	0.0139806	0.0906524	0.0509847
ARRB2	532.087	-0.407678	0.277792	-1.46757	0.142222	0.356863	0.200707
ARRDC1-AS1	330.77	-0.0672036	0.243554	-0.275929	0.782602	0.894587	0.503134
ARRDC1	523.317	0.0902763	0.292924	0.30819	0.757938	0.880511	0.495217
ARRDC2	672.461	-0.245675	0.268858	-0.913773	0.360836	0.602573	0.338899
ARRDC3	1530.47	0.268854	0.636131	0.42264	0.672558	0.82692	0.465077
ARRDC4	343.029	0.122687	0.429774	0.285468	0.775285	0.890283	0.500713
ARSA	424.059	0.346191	0.361554	0.957508	0.338311	0.581918	0.327283
ARSB	1159.85	0.789384	0.225076	3.50719	0.000452873	0.00941897	0.00529742
ARSD	377.054	-0.684014	0.32475	-2.10628	0.0351799	0.159191	0.0895324
ARSE	220.077	-0.552865	0.501977	-1.10138	0.270733	0.516523	0.290503
ARSG	181.85	0.974438	0.673495	1.44684	0.147942	0.364881	0.205216
ARSJ	387.821	-1.01644	0.446696	-2.27547	0.022878	0.121341	0.0682445
ARSK	227.687	-0.00589741	0.214937	-0.0274379	0.978111	0.989929	0.556756
ART3	625.53	-1.17062	0.850784	-1.37594	0.168842	0.393046	0.221057
ARTN	34.9165	0.326545	0.52114	0.626598	0.530923	0.735951	0.413914
ARV1	480.175	-0.133517	0.24162	-0.552591	0.580544	0.77032	0.433244
ARVCF	95.7481	-0.058658	0.393812	-0.148949	0.881594	0.9444	0.53115
ASAH1	748.476	0.253579	0.231837	1.09378	0.27405	0.520402	0.292685
ASAP1	1912.7	-0.688786	0.193133	-3.56638	0.000361949	0.00807858	0.00454356
ASAP2	1213.22	-0.510301	0.216076	-2.36168	0.0181926	0.104657	0.0588609
ASAP3	374.5	-1.68979	0.537074	-3.14628	0.00165361	0.0229221	0.0128918
ASB1	929.373	-0.398939	0.209439	-1.9048	0.0568065	0.212571	0.119554
ASB13	440.441	-0.334643	0.244428	-1.36909	0.170972	0.395739	0.222572
ASB16-AS1	237.663	0.275034	0.269619	1.02008	0.307689	0.553501	0.3113
ASB16	48.0832	0.276153	0.336885	0.819725	0.412373	0.64632	0.363503
ASB3	465.689	-0.245301	0.26948	-0.910276	0.362677	0.604426	0.339941
ASB6	1959.91	0.309275	0.167047	1.85143	0.0641081	0.227225	0.127796
ASB7	530.812	-0.18525	0.149732	-1.23721	0.21601	0.451371	0.25386
ASB8	539.599	0.00813305	0.185016	0.0439586	0.964937	0.984293	0.553587
ASB9	185.623	-1.24559	0.418169	-2.97868	0.00289492	0.0332617	0.0187071
ASCC1	414.351	-0.0491236	0.168976	-0.290713	0.771271	0.887945	0.499398
ASCC2	1162.41	-0.259699	0.188978	-1.37423	0.16937	0.393404	0.221258
ASCC3	2642.87	0.292837	0.155019	1.88903	0.0588874	0.217222	0.12217
ASF1A	784.875	0.259944	0.180959	1.43648	0.150867	0.369244	0.20767
ASF1B	966.027	-0.695475	0.629116	-1.10548	0.268951	0.51436	0.289286
ASGR1	30.8521	0.0657799	0.589612	0.111565	0.911169	0.958808	0.539253
ASH1L-AS1	77.6457	0.131638	0.317613	0.414459	0.678538	0.829828	0.466712
ASH1L	4225.43	-0.00853995	0.153715	-0.0555569	0.955695	0.981095	0.551788
ASH2L	1525.46	-0.0379335	0.155835	-0.243421	0.80768	0.906844	0.510027
ASIC1	318.691	-0.763753	0.498962	-1.53068	0.125848	0.332424	0.186962
ASIC2	17.221	-0.0551552	0.568731	-0.0969794	0.922743	0.964272	0.542326
ASIC3	66.7465	-0.018974	0.388044	-0.0488965	0.961002	0.982876	0.552789
ASIC4	16.9783	-0.0929044	0.629097	-0.147679	0.882596	0.944565	0.531243
ASL	453.187	-0.568667	0.507677	-1.12014	0.262656	0.506972	0.285131
ASMTL	28.9078	-2.02833	0.634864	-3.19491	0.00139877	0.0204952	0.0115269
ASNA1	1887.81	0.320409	0.15822	2.02508	0.0428593	0.179846	0.101149
ASNS	1910.04	-0.372677	0.419663	-0.888039	0.37452	0.613496	0.345043
ASNSD1	853.77	0.393513	0.16624	2.36714	0.0179262	0.104001	0.0584923
ASPH	5799.55	-0.125004	0.212879	-0.587209	0.557064	0.754154	0.424152
ASPHD1	285.811	0.335159	0.358838	0.934012	0.350298	0.593353	0.333714
ASPHD2	93.8994	-0.542989	0.212636	-2.55361	0.0106612	0.076273	0.0428975
ASPM	4249.35	-1.44418	0.42723	-3.38035	0.000723943	0.0130821	0.00735764
ASPRV1	32.2804	1.5985	0.345822	4.62232	3.79e-06	0.000307216	0.000172784
ASPSCR1	469.898	-0.245758	0.196384	-1.25142	0.210783	0.445722	0.250683
ASRGL1	185.723	0.662308	0.358225	1.84886	0.0644777	0.227575	0.127993
ASTE1	136.705	-0.161278	0.306973	-0.525381	0.599318	0.783489	0.44065
ASTN1	635.957	3.77105	0.67688	5.57122	2.53e-08	5.75e-06	3.24e-06
ASTN2	227.586	0.901152	0.256791	3.50928	0.000449323	0.00939525	0.00528408
ASUN	1487.83	-0.278882	0.283213	-0.984706	0.324769	0.570615	0.320925
ASXL1	2756.23	-0.204374	0.11888	-1.71916	0.0855845	0.267778	0.150604
ASXL2	1866.85	-0.36578	0.159587	-2.29204	0.0219031	0.117798	0.066252
ATAD1	2027.68	-0.0876262	0.205365	-0.426685	0.669608	0.825277	0.464153
ATAD2	1760.55	-1.16951	0.609386	-1.91917	0.054963	0.208145	0.117065
ATAD2B	396.213	-0.312331	0.166087	-1.88053	0.060036	0.219356	0.12337
ATAD3A	1917.26	-0.165075	0.197758	-0.834732	0.403868	0.639093	0.359439
ATAD3B	1159.09	-0.0973918	0.240463	-0.405017	0.685465	0.833776	0.468932
ATAD5	558.509	-1.17747	0.715615	-1.6454	0.0998871	0.292067	0.164264
ATCAY	28.0071	0.983579	0.492763	1.99605	0.0459287	0.187884	0.10567
ATE1	1231.31	-0.252513	0.282812	-0.892865	0.371929	0.611841	0.344112
ATF1	692.817	0.0307026	0.192084	0.159839	0.873008	0.941395	0.52946
ATF2	674.865	-0.332339	0.188156	-1.7663	0.077346	0.253283	0.142452
ATF3	274.605	1.11581	0.873253	1.27776	0.201334	0.435101	0.244709
ATF4	5573.75	0.0766307	0.193049	0.396949	0.691405	0.837943	0.471276
ATF5	660.562	0.589237	0.284739	2.06939	0.0385091	0.168448	0.0947385
ATF6	2615.25	0.0727819	0.138933	0.523863	0.600374	0.784334	0.441125
ATF6B	161.35	0.380113	0.435337	0.873145	0.382584	0.620255	0.348844
ATF7	1047.92	-0.117395	0.160525	-0.731321	0.464583	0.688342	0.387138
ATF7IP	2686.54	-0.476408	0.188663	-2.52517	0.0115641	0.0809544	0.0455304
ATF7IP2	103.409	-0.613317	0.317563	-1.93132	0.0534429	0.204496	0.115013
ATG10	172.205	0.0370581	0.273863	0.135316	0.892362	0.949476	0.534005
ATG101	2139.54	0.735221	0.203779	3.60793	0.000308651	0.0071685	0.00403171
ATG12	1387.53	0.509177	0.209658	2.42861	0.0151568	0.0949189	0.0533843
ATG13	2854.66	0.173435	0.110744	1.56609	0.117327	0.319308	0.179585
ATG14	481.34	0.0345651	0.203194	0.170109	0.864925	0.937405	0.527216
ATG16L1	1251.89	0.569652	0.221666	2.56987	0.0101738	0.0741219	0.0416876
ATG16L2	153.156	-0.476817	0.551381	-0.864769	0.387165	0.624315	0.351127
ATG2A	1570.41	0.59863	0.142436	4.20279	2.64e-05	0.00119559	0.000672425
ATG2B	902.957	-0.410973	0.280699	-1.46411	0.143165	0.357911	0.201297
ATG3	1016.15	0.109786	0.148105	0.74127	0.45853	0.683133	0.384208
ATG4A	217.773	0.587419	0.194523	3.01979	0.00252951	0.0306147	0.0172183
ATG4B	839.587	-0.0767402	0.171996	-0.446173	0.655472	0.816836	0.459405
ATG4C	254.436	-0.616859	0.222065	-2.77783	0.0054723	0.0503972	0.0283444
ATG4D	760.498	0.0580097	0.146182	0.396831	0.691492	0.837977	0.471295
ATG5	413.173	-0.355942	0.460129	-0.773569	0.439185	0.666899	0.375078
ATG7	889.33	0.391024	0.252753	1.54706	0.121849	0.326606	0.18369
ATG9A	1577.92	0.102972	0.118849	0.866414	0.386263	0.623396	0.350611
ATHL1	435.015	-0.772583	0.46557	-1.65943	0.0970284	0.287336	0.161603
ATIC	2302.34	-0.766592	0.236902	-3.23591	0.00121257	0.0185827	0.0104513
ATL1	35.1958	0.916853	0.341009	2.68865	0.00717423	0.0590848	0.0332305
ATL2	1230.53	-0.176506	0.194561	-0.907201	0.364301	0.606311	0.341001
ATL3	2288.07	0.256546	0.132178	1.94092	0.0522686	0.201931	0.11357
ATM	2816.15	-0.18934	0.338703	-0.559014	0.576152	0.767382	0.431591
ATMIN	1444.28	-0.381408	0.220784	-1.72752	0.0840751	0.265337	0.149231
ATN1	6063.2	-0.131862	0.116692	-1.13	0.258476	0.502505	0.282619
ATOH8	184.478	-1.38895	0.555396	-2.50083	0.0123904	0.0845656	0.0475614
ATOX1	1878.41	0.682729	0.275477	2.47835	0.0131991	0.0877694	0.0493633
ATP10A	213.499	-0.224445	0.513474	-0.437111	0.662031	0.820778	0.461622
ATP10B	473.74	0.241882	0.557675	0.433732	0.664483	0.821928	0.462269
ATP10D	592.621	0.130275	0.314744	0.413906	0.678943	0.83007	0.466848
ATP11A	2414.04	-0.234189	0.184956	-1.26619	0.205445	0.43921	0.247021
ATP11B	1650.7	-0.546099	0.204028	-2.67659	0.00743756	0.0604197	0.0339812
ATP11C	677.467	-0.138566	0.214748	-0.64525	0.518765	0.726251	0.408458
ATP13A1	2867.78	-0.73734	0.289232	-2.5493	0.0107938	0.0768382	0.0432153
ATP13A2	2263.73	0.0316192	0.187518	0.168619	0.866096	0.937723	0.527394
ATP13A3	3451.36	-0.128775	0.197009	-0.653654	0.513335	0.722884	0.406564
ATP1A1-AS1	58.5999	0.262687	0.333501	0.787665	0.430893	0.660376	0.371409
ATP1A1	25274.3	0.035349	0.175566	0.201344	0.84043	0.925303	0.520409
ATP1A2	214.856	1.95647	0.685789	2.85288	0.00433255	0.0429657	0.0241648
ATP1A3	39.2115	1.22233	0.651701	1.8756	0.0607109	0.220697	0.124124
ATP1B1	1388.91	0.27728	0.15535	1.78488	0.0742813	0.247144	0.138999
ATP1B2	147.031	-0.118058	0.556601	-0.212106	0.832024	0.921421	0.518226
ATP1B3	3611.09	0.101178	0.202771	0.498977	0.617796	0.794691	0.44695
ATP2A1-AS1	100.011	-0.0116657	0.362853	-0.0321499	0.974352	0.988478	0.55594
ATP2A1	43.8955	-0.848839	0.401624	-2.11352	0.0345567	0.157521	0.0885931
ATP2A2	12050.6	0.0534842	0.128703	0.415565	0.677729	0.829435	0.466491
ATP2A3	19.4653	-6.85375	0.872135	-7.85859	3.88e-15	5.57e-12	3.13e-12
ATP2B1	2590.14	0.128578	0.268513	0.47885	0.632045	0.802873	0.451552
ATP2B2	32.9541	1.76565	0.531372	3.32282	0.000891123	0.014918	0.00839017
ATP2B4	7989.68	-0.582472	0.345126	-1.68771	0.0914674	0.278464	0.156614
ATP2C1	2069.12	-0.0866172	0.132273	-0.654836	0.512573	0.722097	0.406122
ATP2C2	24.6265	0.440007	0.494049	0.890615	0.373136	0.61256	0.344516
ATP5A1	7422.48	-0.0467962	0.157935	-0.2963	0.767001	0.885452	0.497996
ATP5B	14333.5	-0.0656284	0.157661	-0.416263	0.677217	0.829094	0.466299
ATP5C1	2187.42	0.0622168	0.15526	0.400725	0.688622	0.836338	0.470374
ATP5D	1365.85	0.0991086	0.211282	0.469083	0.639011	0.807669	0.454249
ATP5E	4856.66	0.330294	0.277659	1.18957	0.234216	0.472921	0.26598
ATP5EP2	35.8858	1.02236	0.975147	1.04841	0.294448	0.540123	0.303776
ATP5F1	3655.6	0.117089	0.149352	0.78398	0.433052	0.662053	0.372352
ATP5G1	1072.46	0.225278	0.242982	0.927136	0.353856	0.597	0.335765
ATP5G2	2951.91	0.0661825	0.143821	0.460172	0.645393	0.812268	0.456836
ATP5G3	2219.9	0.235079	0.230245	1.021	0.307256	0.553136	0.311095
ATP5H	1382.87	-0.109565	0.133496	-0.82074	0.411794	0.645766	0.363192
ATP5I	1074.57	0.546328	0.313879	1.74057	0.0817591	0.261243	0.146928
ATP5J	1124.46	-0.295851	0.339763	-0.87076	0.383885	0.621387	0.349481
ATP5J2	1705.23	0.284847	0.202693	1.40531	0.159928	0.381707	0.21468
ATP5L	2269.8	0.466174	0.139224	3.34837	0.000812894	0.0140009	0.00787441
ATP5O	1573.76	0.244053	0.164392	1.48458	0.137656	0.350935	0.197373
ATP5S	185.368	0.0445904	0.19445	0.229316	0.818623	0.913736	0.513904
ATP5SL	722.948	-0.28462	0.180324	-1.57838	0.114478	0.314689	0.176988
ATP6AP1	3092.44	0.656455	0.200732	3.2703	0.00107433	0.0171629	0.00965273
ATP6AP1L	51.9378	1.34354	0.600852	2.23606	0.0253479	0.129732	0.0729637
ATP6AP2	2804.77	0.229155	0.232218	0.986812	0.323735	0.570057	0.320611
ATP6V0A1	1169.16	0.262986	0.165949	1.58474	0.113025	0.312855	0.175956
ATP6V0A2	543.794	-0.297684	0.252695	-1.17804	0.238782	0.478633	0.269193
ATP6V0A4	625.427	1.34445	0.832662	1.61464	0.106388	0.303141	0.170493
ATP6V0B	2156.37	0.455783	0.15436	2.95273	0.00314975	0.034854	0.0196026
ATP6V0C	2884.09	0.406284	0.111293	3.65057	0.000261655	0.00633365	0.00356217
ATP6V0D1	1332.71	0.435752	0.122036	3.57068	0.000356061	0.00796308	0.0044786
ATP6V0E1	1210.41	0.788913	0.123963	6.3641	1.96e-10	9.71e-08	5.46e-08
ATP6V0E2-AS1	71.5881	0.178725	0.546679	0.326928	0.743722	0.871497	0.490148
ATP6V0E2	517.574	0.0300675	0.376558	0.0798483	0.936358	0.971475	0.546377
ATP6V1A	3267.28	0.369988	0.178477	2.07303	0.0381692	0.167217	0.0940459
ATP6V1B1-AS1	63.8509	0.518907	0.385452	1.34623	0.178229	0.405723	0.228187
ATP6V1B1	37.9128	-0.0682972	0.761505	-0.0896872	0.928536	0.96714	0.543939
ATP6V1B2	1289.18	0.253141	0.128433	1.971	0.0487236	0.194271	0.109262
ATP6V1C1	1372.38	0.247913	0.162327	1.52724	0.126701	0.333326	0.187469
ATP6V1C2	29.8142	0.0604772	0.358747	0.168579	0.866128	0.937723	0.527394
ATP6V1D	900.183	0.279312	0.253927	1.09997	0.271346	0.517211	0.29089
ATP6V1E1	1584.74	0.042593	0.115362	0.369211	0.71197	0.850566	0.478375
ATP6V1E2	84.4508	0.289033	0.223396	1.29382	0.195729	0.428279	0.240873
ATP6V1F	1406.57	0.371452	0.141146	2.63168	0.00849632	0.0658121	0.037014
ATP6V1G1	1255.64	0.555738	0.132759	4.18606	2.84e-05	0.00126388	0.000710834
ATP6V1G2-DDX39B	112.498	0.319247	0.680222	0.469328	0.638835	0.807632	0.454229
ATP6V1H	878.093	0.15709	0.169695	0.925721	0.354591	0.597307	0.335937
ATP7A	896.446	0.629899	0.412047	1.52871	0.126337	0.332843	0.187197
ATP7B	125.187	-0.760975	0.426105	-1.78589	0.0741178	0.246835	0.138825
ATP8A1	220.324	-0.546673	0.542886	-1.00698	0.313946	0.559608	0.314735
ATP8A2	99.9386	-0.497689	0.585075	-0.850642	0.394968	0.631967	0.355431
ATP8B2	2795.14	-1.10227	0.254007	-4.33951	1.43e-05	0.000774274	0.000435467
ATP8B3	68.6367	-1.00316	0.409825	-2.44777	0.0143741	0.0921205	0.0518105
ATP8B4	28.2456	2.71166	0.720062	3.76587	0.000165967	0.00460913	0.00259226
ATP9A	2524.83	0.394824	0.269164	1.46685	0.142416	0.357195	0.200893
ATP9B	120.96	0.127646	0.276983	0.460845	0.64491	0.812087	0.456734
ATPAF1	1232.95	0.33063	0.172563	1.916	0.0553656	0.209248	0.117685
ATPAF2	383.877	0.017289	0.153435	0.11268	0.910284	0.958229	0.538927
ATPIF1	1201.19	0.300296	0.171148	1.7546	0.0793279	0.256861	0.144464
ATR	1718.69	0.105175	0.316926	0.331859	0.739996	0.86912	0.488811
ATRAID	2173.78	0.350622	0.144412	2.42792	0.0151856	0.0949848	0.0534214
ATRIP	522.71	0.241818	0.245983	0.983069	0.325573	0.571612	0.321486
ATRN	3257.77	0.112265	0.161673	0.694399	0.487432	0.703801	0.395832
ATRNL1	36.3908	-0.031149	0.414769	-0.0750996	0.940135	0.973421	0.547471
ATRX	3506.72	-0.211704	0.153275	-1.3812	0.167218	0.390677	0.219725
ATXN1	1063.07	0.00577545	0.347343	0.0166275	0.986734	0.993671	0.558861
ATXN10	1670.71	-0.0574863	0.130301	-0.441181	0.659082	0.818991	0.460617
ATXN1L	1328.01	0.0512454	0.0805669	0.63606	0.524737	0.731396	0.411352
ATXN2	1445.53	-0.573548	0.242505	-2.3651	0.0180252	0.104048	0.0585189
ATXN2L	6076.98	-0.366739	0.138668	-2.64473	0.00817572	0.06423	0.0361242
ATXN3	386.615	-0.243994	0.207399	-1.17644	0.239417	0.479504	0.269683
ATXN3L	71.7435	-0.932606	0.632833	-1.4737	0.140563	0.354936	0.199623
ATXN7	1152.23	-0.0355062	0.15487	-0.229264	0.818663	0.913736	0.513904
ATXN7L1	211.622	0.316853	0.336496	0.941626	0.346384	0.589792	0.331711
ATXN7L2	302.891	-0.194588	0.209623	-0.928276	0.353264	0.596334	0.33539
ATXN7L3	2737.53	0.215724	0.136433	1.58117	0.11384	0.313931	0.176561
ATXN7L3B	3350.39	0.0277184	0.0930301	0.297951	0.765741	0.884782	0.497619
AUH	171.041	-0.141156	0.324955	-0.434386	0.664008	0.821695	0.462138
AUNIP	221.574	-0.60228	0.467119	-1.28935	0.197276	0.430087	0.24189
AUP1	2753.12	0.0330522	0.128727	0.256762	0.797363	0.901036	0.506761
AURKA	1614.69	-0.921938	0.416544	-2.2133	0.0268767	0.134542	0.0756694
AURKAIP1	2340.47	-0.00419509	0.184485	-0.0227394	0.981858	0.991386	0.557576
AURKAPS1	58.2904	-0.354253	0.312974	-1.13189	0.257679	0.501431	0.282015
AURKB	859.685	-0.930156	0.699802	-1.32917	0.183792	0.41236	0.23192
AUTS2	32.6434	-0.919507	0.841548	-1.09264	0.274553	0.521037	0.293042
AVEN	253.73	-0.390759	0.298796	-1.30778	0.190949	0.421553	0.23709
AVIL	33.8635	-0.406595	0.438326	-0.927609	0.35361	0.596778	0.33564
AVL9	1468.64	-0.317215	0.214445	-1.47923	0.139078	0.352565	0.19829
AVPI1	735.901	0.232075	0.241157	0.962341	0.335878	0.580497	0.326483
AVPR2	32.5094	-0.879702	0.670603	-1.31181	0.189585	0.42029	0.23638
AXIN1	941.772	-0.406243	0.235119	-1.72782	0.0840205	0.265337	0.149231
AXIN2	76.5057	2.1542	0.832933	2.58629	0.00970165	0.0719217	0.0404502
AXL	6942.14	-0.450318	0.377916	-1.19158	0.233425	0.471974	0.265448
AZGP1	417.908	1.03939	0.435267	2.38793	0.0169437	0.100456	0.0564986
AZI2	931.691	0.173425	0.295814	0.586264	0.557698	0.7548	0.424515
AZIN1	4375.41	-0.232294	0.161449	-1.4388	0.150206	0.368318	0.207149
AZIN2	104.664	-0.251736	0.429865	-0.585617	0.558133	0.755174	0.424725
B2M	3285	1.00495	0.329461	3.05029	0.00228617	0.0285373	0.01605
B3GALNT2	1600.69	0.0580741	0.137844	0.421303	0.673534	0.82714	0.4652
B3GALT2	30.6274	-0.603035	0.661327	-0.911855	0.361845	0.603496	0.339418
B3GALT5	22.9825	-0.201546	1.77604	-0.11348	0.90965	0.957958	0.538775
B3GALT6	906.297	-0.108691	0.212432	-0.511651	0.608895	0.78935	0.443946
B3GAT1	1013.94	0.282433	0.457632	0.617162	0.537128	0.74067	0.416568
B3GAT3	1961.29	0.212326	0.190741	1.11316	0.265638	0.510199	0.286946
B3GLCT	199.175	-1.12239	0.29186	-3.84566	0.000120229	0.00356705	0.00200618
B3GNT2	269.762	-0.414577	0.273896	-1.51363	0.13012	0.339164	0.190753
B3GNT4	14.9731	-0.294878	0.48186	-0.611958	0.540565	0.74241	0.417546
B3GNT5	477.617	0.104267	0.498459	0.209178	0.834309	0.922291	0.518715
B3GNT7	2215.44	-1.59808	0.592229	-2.69842	0.00696693	0.0580938	0.0326731
B3GNT9	29.1144	-0.252818	0.589659	-0.428752	0.668104	0.824376	0.463646
B3GNTL1	129.262	-0.625653	0.35918	-1.74189	0.0815276	0.260825	0.146693
B4GALNT1	864.244	-0.102163	0.31052	-0.329005	0.742152	0.87044	0.489553
B4GALNT3	148.312	-1.16852	0.390201	-2.99465	0.00274758	0.0322992	0.0181657
B4GALNT4	996.6	-0.448374	0.337148	-1.3299	0.18355	0.412225	0.231844
B4GALT1	1752.61	0.0299066	0.216691	0.138015	0.890229	0.948043	0.533199
B4GALT2	1571.78	-0.0146935	0.15338	-0.0957985	0.923681	0.964397	0.542396
B4GALT3	1708.67	0.113902	0.136404	0.835034	0.403699	0.639093	0.359439
B4GALT4	549.788	0.587295	0.319615	1.83751	0.066135	0.230769	0.129789
B4GALT5	3218.07	-0.307613	0.177558	-1.73247	0.0831906	0.263744	0.148335
B4GALT6	1195.49	0.0316263	0.303035	0.104365	0.91688	0.96171	0.540885
B4GALT7	687.124	0.436285	0.17684	2.46712	0.0136205	0.0894501	0.0503086
B4GAT1	732.188	0.0267517	0.278946	0.0959029	0.923598	0.964392	0.542393
B9D1	369.949	0.253814	0.268824	0.944166	0.345085	0.588543	0.331008
B9D2	102.045	-0.09782	0.223051	-0.438555	0.660984	0.820249	0.461324
BAALC	182.639	0.683019	0.643909	1.06074	0.288809	0.534968	0.300877
BABAM1	3013.5	0.0397734	0.152276	0.261193	0.793943	0.899319	0.505795
BACE1-AS	32.166	-0.735614	0.356222	-2.06505	0.0389185	0.169427	0.0952893
BACE1	2543.49	-0.165196	0.233797	-0.706579	0.479828	0.69857	0.39289
BACE2	4346.11	0.298618	0.189862	1.57282	0.115761	0.316698	0.178117
BACH1	1441.9	-0.0719216	0.242223	-0.296923	0.766525	0.885221	0.497866
BACH2	77.0564	-1.268	0.446015	-2.84296	0.00446967	0.0440511	0.0247752
BAD	728.499	0.260866	0.188025	1.3874	0.16532	0.388515	0.218509
BAG1	1105.67	0.760135	0.194609	3.90596	9.39e-05	0.00301553	0.001696
BAG2	535.927	0.0254352	0.259977	0.0978364	0.922062	0.963901	0.542117
BAG3	3032.81	-0.186375	0.148934	-1.2514	0.210789	0.445722	0.250683
BAG4	447.799	-0.589329	0.193646	-3.04333	0.00233977	0.0289292	0.0162703
BAG5	1096.78	0.00859487	0.236053	0.0364107	0.970955	0.986941	0.555075
BAG6	303.582	2.00292	0.55666	3.5981	0.000320554	0.00738478	0.00415335
BAGE	49.7912	-0.176957	0.338122	-0.523351	0.60073	0.784561	0.441253
BAGE2	221.584	-0.210379	0.437916	-0.480408	0.630937	0.802532	0.45136
BAGE3	213.88	0.220029	0.968276	0.227237	0.820239	0.914497	0.514331
BAGE4	37.4574	-0.478188	0.39059	-1.22427	0.22085	0.456128	0.256536
BAHCC1	1293.51	-0.412139	0.143037	-2.88134	0.00395987	0.040435	0.0227415
BAHD1	1109.69	0.0194272	0.127844	0.15196	0.879218	0.943366	0.530568
BAIAP2-AS1	509.168	0.355318	0.407811	0.87128	0.383601	0.621201	0.349376
BAIAP2	912.82	0.552766	0.244795	2.25807	0.0239411	0.125073	0.0703436
BAIAP2L1	1032.75	-0.626675	0.191792	-3.26746	0.00108516	0.0172782	0.00971762
BAIAP2L2	278.397	-0.866924	0.406697	-2.13162	0.0330381	0.153068	0.0860887
BAIAP3	80.8633	0.460767	0.558691	0.824725	0.409528	0.64362	0.361985
BAK1	493.843	-0.225859	0.270533	-0.834868	0.403792	0.639093	0.359439
BAMBI	927.864	0.27811	0.319996	0.869105	0.38479	0.622281	0.349984
BANF1	2153.84	-0.473549	0.181863	-2.60388	0.00921744	0.0694458	0.0390577
BANP	396.456	-0.325998	0.18859	-1.7286	0.08388	0.265225	0.149168
BAP1	2061.7	0.0878293	0.119554	0.734639	0.462559	0.686319	0.386
BARD1	207.411	-1.01571	0.530322	-1.91527	0.0554577	0.209354	0.117745
BARX1	572.061	-0.524031	0.397247	-1.31915	0.187118	0.417244	0.234667
BARX2	23.4786	-1.35972	0.928466	-1.46448	0.143062	0.357885	0.201282
BASP1	113.012	1.03567	0.911105	1.13672	0.255654	0.499481	0.280918
BATF2	68.5057	-0.0575599	0.469525	-0.122592	0.90243	0.955013	0.537118
BATF3	34.3928	-0.786662	0.529574	-1.48546	0.137421	0.350515	0.197137
BAX	2115.27	0.800002	0.204569	3.91067	9.2e-05	0.00296386	0.00166694
BAZ1A	1579.01	-0.287927	0.18583	-1.54941	0.121284	0.325768	0.183218
BAZ1B	4948.64	-0.225868	0.161593	-1.39776	0.162185	0.384454	0.216225
BAZ2A	4365.94	-0.231252	0.0989472	-2.33713	0.0194326	0.10959	0.0616359
BAZ2B	523.025	-0.322394	0.407411	-0.791324	0.428755	0.65826	0.370219
BBC3	469.457	0.687307	0.317212	2.16671	0.0302571	0.144624	0.0813397
BBIP1	236.152	-0.494079	0.393098	-1.25688	0.208796	0.443419	0.249388
BBS1	787.563	0.482864	0.211383	2.28431	0.0223534	0.119663	0.0673011
BBS10	335.838	-1.23129	0.27814	-4.42686	9.56e-06	0.000578106	0.000325138
BBS12	128.672	0.079711	0.294895	0.270303	0.786927	0.896313	0.504105
BBS2	757.363	-0.327344	0.194215	-1.68547	0.0918982	0.279123	0.156984
BBS4	298.24	-0.920096	0.296621	-3.10193	0.00192264	0.0252071	0.014177
BBS5	112.645	0.00244555	0.324934	0.00752632	0.993995	0.997365	0.560938
BBS7	461.636	0.305701	0.239064	1.27874	0.200988	0.435066	0.24469
BBS9	182.746	-0.375502	0.319132	-1.17663	0.239342	0.479504	0.269683
BBX	3839.32	0.0398097	0.130448	0.305175	0.760233	0.882045	0.49608
BCAM	463.764	-0.670828	0.28233	-2.37604	0.0174993	0.102563	0.0576832
BCAN	1521.67	0.430395	0.403656	1.06624	0.286315	0.532566	0.299526
BCAP29	1255.72	0.24229	0.16713	1.44971	0.147139	0.363912	0.204671
BCAP31	4691.9	0.218713	0.118538	1.84509	0.0650249	0.229001	0.128795
BCAR1	1722.18	0.368102	0.238623	1.54261	0.122926	0.328092	0.184526
BCAR3	2113.28	-1.21464	0.659233	-1.84251	0.0654009	0.229874	0.129286
BCAS1	28.6354	1.54451	0.665917	2.31937	0.0203752	0.112558	0.0633051
BCAS2	953.75	0.236485	0.151975	1.55608	0.11969	0.323127	0.181733
BCAS3	690.977	0.0138735	0.344707	0.0402471	0.967896	0.985499	0.554264
BCAS4	80.0582	0.506837	0.472674	1.07228	0.283596	0.530247	0.298222
BCAT1	2245.39	-0.856239	0.540401	-1.58445	0.113091	0.312855	0.175956
BCAT2	1011.14	-0.295985	0.256548	-1.15372	0.248614	0.490946	0.276118
BCCIP	1946.26	-0.141982	0.272593	-0.520857	0.602467	0.785564	0.441817
BCDIN3D-AS1	48.1871	-0.480225	0.356644	-1.34651	0.178138	0.405589	0.228112
BCDIN3D	161.188	-0.299673	0.289949	-1.03353	0.301354	0.547049	0.307671
BCHE	182.874	-0.0724908	0.289476	-0.250421	0.802262	0.903593	0.508199
BCKDHA	1182.64	-0.166339	0.258415	-0.64369	0.519777	0.727188	0.408985
BCKDHB	272.34	0.0250699	0.186747	0.134246	0.893208	0.949929	0.534259
BCKDK	1470.52	-0.235093	0.108621	-2.16434	0.0304383	0.145007	0.0815547
BCL10	412.415	0.091247	0.147892	0.616985	0.537244	0.740688	0.416578
BCL11A	14.7448	-0.158851	0.760615	-0.208846	0.834569	0.922363	0.518755
BCL2	123.243	-1.11791	0.482575	-2.31654	0.0205287	0.113069	0.0635923
BCL2A1	202.084	3.39897	0.789076	4.30753	1.65e-05	0.000857136	0.000482071
BCL2L1	1668.64	0.27799	0.443509	0.626798	0.530792	0.735951	0.413914
BCL2L11	263.095	-0.352182	0.196893	-1.7887	0.0736635	0.245831	0.13826
BCL2L12	476.309	-0.0896479	0.248593	-0.360621	0.718383	0.855019	0.48088
BCL2L13	1457.91	-0.0866178	0.106621	-0.812387	0.41657	0.649064	0.365047
BCL2L2	1112.48	0.274979	0.150542	1.82659	0.0677609	0.233967	0.131588
BCL3	443.513	-0.493244	0.202519	-2.43554	0.0148694	0.0939914	0.0528627
BCL6	615.569	0.622936	0.381923	1.63105	0.102879	0.29711	0.167101
BCL7A	171.04	-0.956604	0.474642	-2.01542	0.0438602	0.182073	0.102402
BCL7B	1155.71	0.0565815	0.119202	0.47467	0.635023	0.805004	0.45275
BCL7C	722.031	0.0611621	0.19128	0.319752	0.749156	0.875431	0.49236
BCL9	1844.98	-0.0847247	0.176275	-0.48064	0.630772	0.802462	0.451321
BCL9L	3174.99	0.0046272	0.306868	0.0150788	0.987969	0.994423	0.559284
BCLAF1	3729.02	-0.084884	0.222403	-0.381667	0.702708	0.845202	0.475359
BCOR	2501.68	0.0299864	0.15256	0.196555	0.844176	0.927332	0.52155
BCORL1	978.04	0.207783	0.241402	0.860735	0.389384	0.626389	0.352294
BCR	1026.53	-0.456055	0.177612	-2.5677	0.0102375	0.0744309	0.0418614
BCS1L	408.496	-0.561402	0.277301	-2.02452	0.0429163	0.179972	0.10122
BCYRN1	238.72	3.12347	0.928446	3.36419	0.000767674	0.0135727	0.00763358
BDH2	232.483	-0.166501	0.432618	-0.384868	0.700335	0.844054	0.474713
BDNF-AS	21.0293	1.51643	0.459384	3.30101	0.000963366	0.0158016	0.00888713
BDNF	251.517	1.68456	0.590107	2.85467	0.00430815	0.0427533	0.0240453
BDP1	102.821	-0.634354	0.301525	-2.10382	0.0353944	0.159704	0.0898205
BECN1	1676.19	0.025186	0.125954	0.199961	0.841511	0.925539	0.520542
BEGAIN	53.9872	-0.0768586	0.502803	-0.15286	0.878509	0.943281	0.53052
BEND3	255.2	-0.480917	0.423512	-1.13554	0.256148	0.500017	0.281219
BEND3P3	295.817	-0.432747	0.303653	-1.42514	0.154118	0.373489	0.210058
BEND4	105.648	-2.72591	0.812522	-3.35488	0.000793997	0.0138322	0.00777951
BEND5	16.2384	0.215792	0.513596	0.420158	0.67437	0.827545	0.465428
BEND6	70.223	0.283472	0.451723	0.627535	0.530309	0.735727	0.413788
BEND7	36.8132	-0.478403	0.788569	-0.606672	0.544069	0.745292	0.419167
BEST1	37.2095	-0.688237	0.530111	-1.29829	0.194188	0.426143	0.239672
BET1	405.605	0.383997	0.250043	1.53572	0.124607	0.330363	0.185803
BET1L	1355.9	0.222684	0.222846	0.999272	0.317663	0.564064	0.317241
BEX1	25.0485	0.325079	0.614339	0.529152	0.5967	0.781672	0.439628
BEX2	62.1654	1.38405	0.522703	2.64787	0.00810004	0.0639177	0.0359486
BEX4	183.947	0.314462	0.57891	0.543197	0.586994	0.774977	0.435863
BFAR	194.203	0.957061	0.69861	1.36995	0.170703	0.395244	0.222293
BFSP1	357.212	0.952112	0.482984	1.97131	0.0486883	0.194238	0.109243
BGN	401.115	-1.21482	0.512891	-2.36858	0.0178567	0.103934	0.0584547
BHLHB9	62.7451	0.14186	0.578518	0.245212	0.806292	0.906067	0.50959
BHLHE40	1541.6	0.255625	0.563858	0.453349	0.650297	0.814648	0.458174
BHLHE41	91.0095	1.10138	0.337893	3.25954	0.00111594	0.0177092	0.00996003
BICC1	169.648	-1.14012	0.356828	-3.19515	0.0013976	0.0204952	0.0115269
BICD1	905.201	-0.317227	0.241498	-1.31358	0.188989	0.419812	0.236111
BICD2	1884.24	-0.0272977	0.16103	-0.169519	0.865388	0.937624	0.527339
BID	425.311	-0.697941	0.269966	-2.58529	0.00972963	0.0720174	0.040504
BIN1	102.699	-0.145566	0.41742	-0.348728	0.727294	0.860763	0.48411
BIN3-IT1	20.6684	-1.1067	0.525014	-2.10795	0.0350353	0.158889	0.0893621
BIN3	1471.92	-0.563522	0.349019	-1.61459	0.1064	0.303141	0.170493
BIRC2	2824.44	0.911195	0.324043	2.81195	0.00492416	0.0470108	0.0264398
BIRC3	797.31	1.76951	0.52805	3.35103	0.000805109	0.0139507	0.00784614
BIRC5	1462.01	-0.514158	0.766253	-0.671003	0.502218	0.715185	0.402235
BIRC6	4646.78	-0.235953	0.133935	-1.7617	0.0781198	0.254345	0.143049
BISPR	45.6959	-1.08778	0.872391	-1.2469	0.212435	0.447714	0.251803
BIVM-ERCC5	36.7393	0.735474	2.23224	0.329478	0.741795	0.870306	0.489478
BIVM	1156.58	-0.227889	0.464717	-0.490383	0.623863	0.798638	0.44917
BLACAT1	167.563	0.200799	0.552887	0.363183	0.716468	0.853519	0.480037
BLCAP	1030.91	0.738515	0.142342	5.1883	2.12e-07	3.44e-05	1.93e-05
BLID	25.4295	-0.3269	0.579391	-0.564213	0.572609	0.764664	0.430062
BLM	494.276	-1.13485	0.453211	-2.50403	0.0122788	0.0841752	0.0473418
BLMH	1570.03	-0.729437	0.257029	-2.83795	0.00454041	0.0444953	0.0250251
BLOC1S1-RDH5	55.1882	-0.696539	1.71648	-0.405794	0.684894	0.833587	0.468826
BLOC1S1	838.081	0.309485	0.214359	1.44377	0.148804	0.366071	0.205886
BLOC1S2	1051.25	0.748947	0.139214	5.37984	7.46e-08	1.5e-05	8.46e-06
BLOC1S3	248.432	0.13877	0.194902	0.711999	0.476465	0.69607	0.391484
BLOC1S4	434.768	0.176522	0.211606	0.834201	0.404168	0.639263	0.359534
BLOC1S5	268.856	-0.543675	0.388366	-1.3999	0.161542	0.383743	0.215825
BLOC1S6	1364.76	-0.116729	0.11258	-1.03686	0.299803	0.545547	0.306827
BLVRA	611.264	-0.274293	0.172185	-1.59302	0.111157	0.310381	0.174565
BLVRB	565.752	1.29585	0.323	4.01191	6.02e-05	0.0021631	0.00121657
BLZF1	673.153	-0.298048	0.260446	-1.14437	0.25247	0.495465	0.27866
BMF	257.606	0.91972	0.553253	1.66239	0.0964354	0.28603	0.160869
BMI1	1103.85	-0.000135264	0.142938	-0.000946318	0.999245	0.999524	0.562152
BMP1	1048.41	0.348859	0.273369	1.27615	0.201904	0.435669	0.245029
BMP2	601.315	1.08425	0.42191	2.56985	0.0101743	0.0741219	0.0416876
BMP2K	256.408	-0.110623	0.22284	-0.496424	0.619595	0.795734	0.447537
BMP4	46.9489	0.536775	0.473119	1.13455	0.256566	0.500387	0.281428
BMP6	277.66	-0.0333995	0.454059	-0.0735577	0.941362	0.973748	0.547656
BMP7	232.517	0.12615	0.461788	0.273178	0.784716	0.89536	0.503569
BMP8A	94.6195	-0.27217	0.287989	-0.94507	0.344623	0.58805	0.330731
BMP8B	654.053	-0.130572	0.389699	-0.335058	0.737581	0.867806	0.488072
BMPR1A	870.885	-0.239111	0.219158	-1.09104	0.275254	0.521882	0.293517
BMPR1B	40.0821	0.0838527	0.367574	0.228124	0.819549	0.914155	0.514139
BMPR2	1682.75	0.178439	0.255883	0.697345	0.485587	0.702526	0.395115
BMS1	2501.93	-0.132324	0.133012	-0.994828	0.31982	0.566504	0.318613
BMS1P17	15.017	-0.775954	0.440392	-1.76196	0.0780755	0.254278	0.143011
BMS1P20	270.574	0.440156	0.140541	3.13187	0.00173696	0.0234913	0.013212
BMS1P4	54.9598	-0.776019	0.355366	-2.18372	0.0289829	0.141123	0.0793705
BMS1P5	32.8834	-2.79616	0.696175	-4.01646	5.91e-05	0.00213254	0.00119938
BMS1P6	45.5014	-1.06659	0.41006	-2.60105	0.00929381	0.0698742	0.0392987
BNC1	32.4826	-1.24489	0.892588	-1.3947	0.163106	0.385612	0.216876
BNC2	589.889	-0.955428	0.689433	-1.38582	0.165803	0.38899	0.218776
BNIP1	280.95	0.0248017	0.223986	0.110729	0.911831	0.958951	0.539334
BNIP2	1218.85	-0.27037	0.237312	-1.1393	0.254577	0.498224	0.280211
BNIP3	1729.34	0.241643	0.558131	0.432951	0.66505	0.822133	0.462384
BNIP3L	1274.4	0.408709	0.258603	1.58045	0.114004	0.314139	0.176678
BOC	267.613	-0.298224	0.483594	-0.616683	0.537444	0.740756	0.416616
BOD1	1194.07	-0.237028	0.13859	-1.71029	0.0872131	0.271186	0.152521
BOD1L1	4324.21	-0.614238	0.214372	-2.86529	0.0041663	0.0418089	0.0235141
BOK	495.358	0.426808	0.292776	1.4578	0.144897	0.360418	0.202707
BOLA1	31.2409	-0.541833	0.437385	-1.2388	0.215418	0.451103	0.25371
BOLA2	18.0969	0.370819	1.03855	0.357056	0.72105	0.85677	0.481864
BOLA2B	159.616	0.290687	0.574706	0.505801	0.612997	0.79163	0.445229
BOLA3-AS1	476.938	0.10404	0.14895	0.698489	0.484871	0.701981	0.394808
BOLA3	574.771	0.362379	0.234891	1.54275	0.122891	0.328059	0.184507
BOP1	2708.43	-0.126092	0.240865	-0.523496	0.600629	0.784524	0.441232
BORA	243.911	-1.10616	0.489725	-2.25873	0.0239	0.125012	0.0703095
BPGM	206.324	-0.300103	0.267996	-1.1198	0.262798	0.506987	0.285139
BPHL	140.44	-0.0811416	0.312666	-0.259515	0.795238	0.899653	0.505983
BPNT1	1261.86	-0.0699166	0.10783	-0.648394	0.51673	0.725038	0.407776
BPTF	3404.97	-0.0869695	0.11258	-0.772511	0.439812	0.667496	0.375413
BRAF	475.843	-0.29508	0.175112	-1.6851	0.0919696	0.27928	0.157073
BRAP	851.707	0.158938	0.120924	1.31437	0.188722	0.41948	0.235924
BRAT1	1231.14	-0.323265	0.136358	-2.37071	0.017754	0.103631	0.0582843
BRCA1	1537.27	-0.730168	0.726969	-1.0044	0.315186	0.56107	0.315557
BRCA2	563.945	-1.26235	0.833843	-1.51389	0.130053	0.339157	0.190749
BRCAT54	32.5884	-1.13196	0.478517	-2.36556	0.0180027	0.104048	0.0585189
BRCC3	775.962	-0.0569269	0.254583	-0.223609	0.823062	0.916291	0.51534
BRD1	663.382	-0.028341	0.09044	-0.313368	0.754001	0.878508	0.494091
BRD2	315.094	0.490754	0.462852	1.06028	0.289016	0.534986	0.300887
BRD3	1383.98	-0.542512	0.138952	-3.9043	9.45e-05	0.00302948	0.00170384
BRD4	3555.48	-0.292164	0.162506	-1.79786	0.0721985	0.24234	0.136297
BRD7	1489.12	-0.287903	0.134231	-2.14483	0.0319661	0.149893	0.0843031
BRD8	1491.86	-0.311423	0.127057	-2.45105	0.014244	0.0917352	0.0515937
BRD9	1247.41	-0.211702	0.13939	-1.51877	0.128821	0.337108	0.189596
BRE	698.931	-0.0272076	0.120918	-0.225009	0.821972	0.91582	0.515076
BRF1	660.756	0.0392498	0.194869	0.201416	0.840373	0.925303	0.520409
BRF2	233.605	0.52339	0.308637	1.69581	0.0899215	0.275572	0.154987
BRI3	966.264	0.737427	0.30602	2.40974	0.0159641	0.0976021	0.0548934
BRI3BP	397.693	-0.345305	0.280543	-1.23085	0.218381	0.453792	0.255222
BRICD5	20.5882	-0.670213	0.365343	-1.83447	0.0665836	0.231643	0.13028
BRINP2	232.186	3.01189	0.575732	5.23142	1.68e-07	2.84e-05	1.59e-05
BRIP1	525.176	-0.526975	0.443915	-1.18711	0.235184	0.473874	0.266516
BRIX1	1907	-0.338567	0.191924	-1.76407	0.0777196	0.253787	0.142735
BRK1	1460.23	0.488684	0.176815	2.76381	0.00571301	0.0517494	0.0291049
BRMS1	1195.46	0.448177	0.139327	3.21674	0.00129658	0.0194149	0.0109193
BRMS1L	232.304	-0.0821222	0.355766	-0.230832	0.817445	0.913015	0.513498
BROX	2002.87	0.188173	0.21041	0.894316	0.371153	0.611476	0.343906
BRPF1	903.531	0.235094	0.168522	1.39503	0.163006	0.385458	0.216789
BRPF3	1418.4	0.271869	0.20669	1.31535	0.188394	0.418999	0.235654
BRSK1	1224.04	0.280292	0.272547	1.02841	0.303755	0.549875	0.309261
BRSK2	43.1258	0.37616	0.41738	0.90124	0.367461	0.609066	0.342551
BRWD1	1237.95	-0.212972	0.175681	-1.21227	0.22541	0.461873	0.259767
BRWD3	1212.13	-0.921309	0.363389	-2.53532	0.0112344	0.079272	0.0445842
BSCL2	1326.25	-0.310834	0.347641	-0.894124	0.371256	0.611575	0.343962
BSDC1	2208.81	0.588744	0.215405	2.73319	0.00627235	0.0545667	0.0306894
BSG	12175.4	0.314731	0.133622	2.35539	0.0185035	0.10585	0.0595323
BSN	280.39	1.395	0.353631	3.9448	7.99e-05	0.00266881	0.00150099
BST1	117.79	-0.55267	0.529289	-1.04417	0.296405	0.542185	0.304936
BST2	72.9647	-1.39464	0.664644	-2.09833	0.0358763	0.160753	0.0904108
BTAF1	2046.57	-0.201443	0.223658	-0.900672	0.367763	0.609183	0.342617
BTBD1	1973.91	-0.0766194	0.114913	-0.666759	0.504926	0.717505	0.40354
BTBD10	524.062	0.220943	0.234592	0.941819	0.346285	0.589693	0.331655
BTBD11	466.242	2.18545	1.40501	1.55547	0.119835	0.323397	0.181885
BTBD19	244.677	0.561507	0.356788	1.57378	0.115538	0.316544	0.178031
BTBD2	1702.77	-0.42538	0.131132	-3.24391	0.00117901	0.0182454	0.0102616
BTBD3	2555.6	-0.608891	0.329748	-1.84654	0.0648142	0.22854	0.128536
BTBD6	699.713	0.351632	0.173903	2.022	0.0431761	0.180541	0.10154
BTBD7	31.9365	0.498101	0.42954	1.15961	0.246206	0.488052	0.27449
BTBD8	18.6253	-0.302453	0.548301	-0.55162	0.581209	0.770821	0.433526
BTBD9	600.568	0.355361	0.220328	1.61287	0.106772	0.303581	0.17074
BTC	30.0921	1.81645	0.691046	2.62856	0.00857473	0.0660245	0.0371335
BTD	307.368	-0.372191	0.307354	-1.21095	0.225915	0.46251	0.260125
BTF3	9895.74	0.00310572	0.171479	0.0181114	0.98555	0.993104	0.558542
BTF3L4	1561.47	0.0657067	0.29482	0.222871	0.823636	0.916585	0.515506
BTG1	4287.21	0.679437	0.281994	2.4094	0.0159787	0.0976021	0.0548934
BTG2	996.557	1.12653	0.322386	3.49436	0.000475206	0.00977003	0.00549486
BTG3	493.384	0.291058	0.216156	1.34652	0.178135	0.405589	0.228112
BTN2A1	442.122	0.0312465	0.201615	0.154981	0.876836	0.942749	0.530221
BTN2A2	454.891	0.730388	0.293062	2.49227	0.0126931	0.0857979	0.0482545
BTN2A3P	32.9243	-0.0541835	0.306429	-0.176823	0.859648	0.935543	0.526168
BTN3A1	346.6	-0.0866673	0.296932	-0.291876	0.770381	0.887704	0.499263
BTN3A2	658.9	-0.217388	0.208749	-1.04138	0.297699	0.543632	0.30575
BTN3A3	261.542	0.0944771	0.278041	0.339795	0.734011	0.865425	0.486733
BTRC	913.735	-0.209255	0.147668	-1.41706	0.156465	0.376388	0.211688
BUB1	1094.24	-1.12559	0.631169	-1.78335	0.0745292	0.247516	0.139208
BUB1B	1489.23	-1.06661	0.620064	-1.72016	0.0854029	0.26751	0.150453
BUB3	3108.17	-0.329743	0.189963	-1.73582	0.0825948	0.262494	0.147632
BUD13	522.926	-0.564406	0.2462	-2.29247	0.0218783	0.117798	0.066252
BUD31	1917.58	0.12446	0.166381	0.748042	0.454435	0.679772	0.382317
BVES	229.06	-0.267703	0.319626	-0.837552	0.402283	0.638042	0.358848
BYSL	739.434	-0.0229478	0.257652	-0.0890653	0.92903	0.967525	0.544156
BZW1	4646.17	0.339408	0.145965	2.32528	0.0200571	0.111575	0.0627521
BZW2	3109.57	-0.0588186	0.128333	-0.458329	0.646716	0.812986	0.45724
C10orf10	21.4246	-0.667323	0.454246	-1.46908	0.141811	0.356455	0.200478
C10orf11	24.7461	-0.666196	0.602723	-1.10531	0.269025	0.51436	0.289286
C10orf12	412.682	-0.031509	0.203673	-0.154704	0.877055	0.942827	0.530265
C10orf2	1382.02	-0.715037	0.29054	-2.46107	0.0138524	0.0902201	0.0507416
C10orf25	41.1352	1.02474	0.341686	2.99907	0.00270808	0.0319242	0.0179548
C10orf32	375.715	0.219631	0.22593	0.972121	0.33099	0.576514	0.324243
C10orf35	19.8805	-1.51005	0.760522	-1.98555	0.0470837	0.190276	0.107015
C10orf54	363.793	1.35349	0.467464	2.89538	0.00378704	0.0394678	0.0221975
C10orf76	718.21	-0.0797132	0.143066	-0.557179	0.577405	0.768265	0.432088
C10orf88	224.07	-0.364217	0.21397	-1.70219	0.0887199	0.273234	0.153672
C10orf90	848.156	1.31924	0.456786	2.88808	0.00387597	0.0400163	0.022506
C11orf1	304.755	0.054053	0.312985	0.172702	0.862886	0.936328	0.52661
C11orf24	2207.48	0.378873	0.224914	1.68452	0.0920809	0.279304	0.157086
C11orf30	728.202	-0.0338257	0.178859	-0.18912	0.849999	0.930728	0.52346
C11orf31	1750.66	-0.0750471	0.158731	-0.472795	0.63636	0.805704	0.453144
C11orf45	21.9537	-0.0675369	1.05549	-0.0639865	0.948981	0.977705	0.549881
C11orf49	545.025	-0.494926	0.218199	-2.26823	0.0233152	0.122969	0.0691602
C11orf54	427.953	-0.109466	0.316118	-0.346282	0.729131	0.862173	0.484903
C11orf57	980.809	-0.153848	0.254763	-0.603887	0.545919	0.74697	0.420111
C11orf58	2117.8	0.30521	0.17591	1.73503	0.0827351	0.262648	0.147719
C11orf63	132.053	0.0268695	0.606063	0.0443346	0.964638	0.984212	0.553541
C11orf68	1303.13	-0.0308412	0.242909	-0.126966	0.898967	0.952882	0.53592
C11orf70	23.5758	0.701928	0.660225	1.06317	0.287707	0.533839	0.300242
C11orf71	239.44	0.560874	0.29738	1.88605	0.0592876	0.217685	0.122431
C11orf73	594.236	-0.215238	0.143909	-1.49565	0.134745	0.346543	0.194903
C11orf74	171.638	0.612837	0.44867	1.3659	0.171971	0.397072	0.223321
C11orf80	284.879	0.178444	0.224882	0.793499	0.427487	0.657355	0.36971
C11orf84	1076.72	-0.605747	0.22126	-2.73771	0.00618683	0.054291	0.0305344
C11orf91	36.2393	1.1064	0.404568	2.73476	0.00624265	0.0544744	0.0306375
C11orf95	1395.27	0.222662	0.233242	0.954637	0.339761	0.583114	0.327955
C11orf96	48.6388	-0.848715	0.595636	-1.42489	0.154189	0.373489	0.210058
C11orf98	1527.47	0.236858	0.189402	1.25056	0.211095	0.446033	0.250858
C12orf10	1037.18	-0.835156	0.168993	-4.94194	7.73e-07	9.56e-05	5.37e-05
C12orf29	606.277	-0.389676	0.270204	-1.44216	0.149259	0.366737	0.206261
C12orf4	639.897	0.053445	0.154547	0.345817	0.72948	0.862332	0.484993
C12orf43	556	0.214176	0.198831	1.07718	0.281401	0.528189	0.297064
C12orf45	240.753	0.0557116	0.222323	0.250588	0.802133	0.903589	0.508197
C12orf49	1195.31	-0.294999	0.339144	-0.869833	0.384392	0.621989	0.349819
C12orf57	1009.55	-0.283559	0.287059	-0.987807	0.323247	0.569825	0.320481
C12orf60	20.7227	-0.0349682	0.420909	-0.0830777	0.93379	0.969723	0.545392
C12orf65	289.564	-0.267615	0.155519	-1.72079	0.0852896	0.267333	0.150353
C12orf66	255.272	-0.242616	0.239562	-1.01275	0.311181	0.557244	0.313405
C12orf73	226.626	-0.0350434	0.18322	-0.191264	0.848319	0.929602	0.522827
C12orf75	887.439	-0.204632	0.362766	-0.564088	0.572694	0.764664	0.430062
C12orf76	154.06	-0.518961	0.324649	-1.59853	0.109924	0.308268	0.173376
C12orf79	25.6074	0.673303	0.484537	1.38958	0.164656	0.387825	0.21812
C14orf1	376.159	0.216397	0.22248	0.97266	0.330723	0.576514	0.324243
C14orf119	665.327	0.158943	0.0976098	1.62835	0.10345	0.297978	0.167589
C14orf132	278.854	1.4231	0.48751	2.91912	0.00351026	0.0374347	0.021054
C14orf159	600.111	1.0713	0.233545	4.58714	4.49e-06	0.000345976	0.000194584
C14orf166	1597.33	0.196004	0.13717	1.42891	0.15303	0.37203	0.209237
C14orf169	442.751	0.104987	0.177474	0.591564	0.554143	0.752393	0.423161
C14orf2	874.207	0.483499	0.251795	1.92021	0.0548316	0.207756	0.116846
C14orf28	45.6172	0.803331	0.391345	2.05274	0.0400974	0.172551	0.0970462
C14orf37	34.04	0.732846	0.782352	0.936722	0.348902	0.591968	0.332935
C14orf79	208.999	0.289638	0.278572	1.03972	0.298469	0.544155	0.306044
C14orf80	267.082	-0.313895	0.45442	-0.690759	0.489717	0.705433	0.39675
C14orf93	198.338	-0.346238	0.204248	-1.69518	0.0900407	0.275878	0.15516
C15orf38-AP3S2	192.501	-0.3979	1.10544	-0.359948	0.718886	0.855333	0.481057
C15orf39	1014.18	0.247663	0.237909	1.041	0.297876	0.543632	0.30575
C15orf40	371.571	-0.00759725	0.171216	-0.0443724	0.964608	0.984212	0.553541
C15orf41	312.753	-0.297403	0.243177	-1.22299	0.221335	0.456889	0.256964
C15orf48	45.1952	2.45354	0.82733	2.96562	0.00302076	0.0340311	0.0191398
C15orf52	2622.89	0.125686	0.23897	0.525948	0.598924	0.783297	0.440542
C15orf54	40.794	-0.46691	0.711496	-0.656237	0.511671	0.721678	0.405886
C15orf56	12.5136	-0.692061	0.460961	-1.50134	0.133267	0.344171	0.193569
C15orf57	377.727	0.312542	0.159039	1.96519	0.0493923	0.195984	0.110225
C15orf59	25.3338	0.721393	0.491864	1.46665	0.142471	0.357238	0.200918
C15orf61	137.553	-0.447096	0.380035	-1.17646	0.239411	0.479504	0.269683
C15orf62	87.4763	0.934671	0.635865	1.46992	0.141583	0.356132	0.200296
C15orf65	29.1597	0.146358	0.428698	0.341401	0.732801	0.864671	0.486308
C16orf13	1378.09	0.14388	0.190033	0.757133	0.44897	0.674357	0.379272
C16orf45	214.946	0.897353	0.518439	1.73087	0.0834745	0.26441	0.148709
C16orf46	42.0784	-0.689123	0.37889	-1.81879	0.068943	0.236692	0.133121
C16orf47	36.9287	0.180023	0.469102	0.383761	0.701155	0.844641	0.475043
C16orf52	3270.06	-0.625641	0.618727	-1.01117	0.311933	0.557704	0.313664
C16orf58	2341.29	-0.163625	0.18163	-0.900867	0.367659	0.609152	0.342599
C16orf59	171.976	-1.63153	0.394951	-4.13098	3.61e-05	0.00147471	0.000829406
C16orf62	1546.04	-0.156563	0.107345	-1.4585	0.144704	0.360251	0.202612
C16orf70	425.301	0.0733616	0.168376	0.4357	0.663054	0.82122	0.461871
C16orf72	1635.97	0.323333	0.164535	1.96513	0.0493994	0.195984	0.110225
C16orf74	58.9588	-0.78172	0.586196	-1.33355	0.182352	0.410672	0.23097
C16orf86	64.9694	-1.25323	0.475322	-2.63659	0.00837447	0.0652207	0.0366815
C16orf87	295.714	0.151473	0.263602	0.574627	0.565543	0.760413	0.427672
C16orf91	538.44	0.272348	0.15308	1.77913	0.0752185	0.248991	0.140037
C16orf93	63.9988	0.34949	0.301098	1.16072	0.245756	0.487634	0.274255
C16orf95	50.485	0.221226	0.36846	0.600407	0.548235	0.748567	0.421009
C17orf100	62.1494	0.103866	0.280906	0.369755	0.711565	0.850377	0.478269
C17orf104	17.6689	0.493861	0.421587	1.17143	0.241425	0.482109	0.271148
C17orf49	485.344	-0.860788	0.466683	-1.84448	0.0651131	0.229228	0.128923
C17orf51	680.208	0.445534	0.351092	1.26899	0.204444	0.43774	0.246194
C17orf53	238.083	-0.88646	0.394789	-2.2454	0.0247422	0.127814	0.0718851
C17orf58	232.289	-0.55376	0.187469	-2.95387	0.00313816	0.0348063	0.0195758
C17orf59	186.277	0.0135857	0.291143	0.0466633	0.962782	0.983685	0.553244
C17orf62	981.748	-0.139358	0.277589	-0.502028	0.615647	0.793223	0.446125
C17orf67	39.4571	0.369345	0.382268	0.966194	0.333947	0.579338	0.325831
C17orf75	486.134	0.0512945	0.242302	0.211697	0.832343	0.92161	0.518332
C17orf80	748.382	-0.289621	0.202057	-1.43337	0.151753	0.370071	0.208135
C17orf82	27.7655	1.66922	0.820423	2.03459	0.0418926	0.177138	0.0996261
C17orf85	1267.08	-0.444978	0.112693	-3.94858	7.86e-05	0.00266135	0.0014968
C17orf89	978.413	0.802071	0.171369	4.68037	2.86e-06	0.000244611	0.000137574
C17orf96	46.2776	0.411752	0.682698	0.603124	0.546426	0.747379	0.420341
C17orf97	52.4749	0.581374	0.322892	1.80052	0.0717782	0.242019	0.136116
C18orf21	241.882	0.120436	0.206305	0.583779	0.559369	0.756204	0.425304
C18orf25	951.431	-0.401689	0.159934	-2.51159	0.012019	0.0829634	0.0466603
C18orf32	219.158	0.0526071	0.381376	0.13794	0.890287	0.948043	0.533199
C18orf54	244.428	-0.825817	0.385191	-2.14391	0.0320398	0.149943	0.084331
C18orf65	26.1985	0.518439	0.408484	1.26918	0.204377	0.437711	0.246178
C18orf8	736.353	0.22852	0.156072	1.46419	0.143141	0.357911	0.201297
C19orf12	476.12	-0.436581	0.200585	-2.17654	0.029515	0.142551	0.0801738
C19orf24	534.453	0.140377	0.20964	0.669609	0.503107	0.716083	0.40274
C19orf25	402.046	-0.525573	0.157925	-3.32798	0.000874778	0.0147825	0.00831399
C19orf43	3671.41	0.197541	0.123124	1.6044	0.108626	0.306782	0.17254
C19orf44	407.171	-0.638923	0.166473	-3.838	0.000124042	0.003665	0.00206127
C19orf47	425.334	-0.184527	0.207305	-0.890124	0.373399	0.612782	0.344641
C19orf48	1900.03	-0.00433173	0.266169	-0.0162744	0.987016	0.993812	0.55894
C19orf52	561.438	0.0331432	0.181676	0.18243	0.855245	0.933623	0.525088
C19orf53	2354.75	0.249221	0.205738	1.21135	0.225761	0.462371	0.260047
C19orf54	410.132	-0.258561	0.173137	-1.49339	0.135334	0.347401	0.195385
C19orf57	93.1109	-0.423254	0.39433	-1.07335	0.283114	0.529776	0.297957
C19orf60	902.032	0.308358	0.160311	1.92349	0.0544181	0.206895	0.116362
C19orf66	533.608	-0.0492128	0.325585	-0.151152	0.879856	0.943667	0.530737
C19orf68	198.235	-0.023036	0.207507	-0.111013	0.911606	0.958907	0.539309
C19orf70	901.121	0.140176	0.332821	0.421174	0.673628	0.827172	0.465218
C19orf71	284.122	0.169488	0.387901	0.436935	0.662158	0.820778	0.461622
C19orf73	42.4301	1.04922	0.646636	1.62258	0.104679	0.300452	0.16898
C19orf81	30.9006	0.681475	0.699456	0.974294	0.329911	0.575837	0.323862
C1D	340.006	0.138893	0.173051	0.80261	0.4222	0.653806	0.367714
C1GALT1	567.211	-0.058797	0.23383	-0.251452	0.801465	0.903263	0.508013
C1GALT1C1	532.555	0.260872	0.168645	1.54687	0.121896	0.32662	0.183698
C1GALT1C1L	29.4687	0.469587	0.28416	1.65255	0.0984235	0.289255	0.162683
C1orf106	401.713	-0.875381	0.326349	-2.68235	0.00731074	0.0597621	0.0336114
C1orf109	575.854	0.0404682	0.174169	0.23235	0.816266	0.912268	0.513078
C1orf112	489.493	-0.80295	0.262453	-3.05941	0.00221774	0.0279263	0.0157063
C1orf122	1157.61	0.394393	0.197245	1.9995	0.0455538	0.186977	0.105159
C1orf123	587.43	0.196253	0.121463	1.61574	0.10615	0.303013	0.170421
C1orf131	500.072	0.0450362	0.176325	0.255416	0.798402	0.901726	0.507149
C1orf159	258.833	-0.197741	0.237525	-0.832506	0.405123	0.639902	0.359894
C1orf174	439.398	-0.342897	0.225296	-1.52199	0.128013	0.335697	0.188803
C1orf198	1917.53	0.319904	0.332617	0.961779	0.336161	0.580497	0.326483
C1orf204	27.1725	1.34351	0.579181	2.31966	0.0203591	0.112538	0.0632938
C1orf21	883.717	0.0439995	0.449599	0.0978639	0.92204	0.963901	0.542117
C1orf216	661.368	0.432756	0.222975	1.94083	0.0522793	0.201931	0.11357
C1orf220	19.3642	-0.496995	0.417141	-1.19143	0.233484	0.471974	0.265448
C1orf226	307.812	-0.827395	0.359867	-2.29917	0.0214952	0.116412	0.0654724
C1orf233	164.125	-0.52697	0.306472	-1.71947	0.0855287	0.267733	0.150578
C1orf27	976.834	-0.00702937	0.21499	-0.0326963	0.973917	0.988361	0.555874
C1orf35	508.159	0.0509117	0.218576	0.232924	0.81582	0.911983	0.512917
C1orf43	6262.32	-0.102941	0.0972332	-1.0587	0.289736	0.535524	0.30119
C1orf50	142.56	0.143541	0.234158	0.613006	0.539872	0.742098	0.417371
C1orf52	392.29	-0.0273764	0.170535	-0.160533	0.872462	0.941073	0.529278
C1orf53	70.4993	0.378977	0.356956	1.06169	0.288377	0.534597	0.300668
C1orf54	19.8753	0.0580079	0.618552	0.0937801	0.925284	0.965297	0.542902
C1orf56	318.224	0.331368	0.267412	1.23917	0.215283	0.451039	0.253674
C1orf61	77.317	1.09968	0.529453	2.077	0.0378011	0.166275	0.0935165
C1orf74	206.545	-0.268278	0.201839	-1.32917	0.183793	0.41236	0.23192
C1QBP	6011.02	-0.189567	0.247017	-0.767425	0.442829	0.670177	0.376921
C1QL1	137.415	-1.07977	0.448034	-2.41001	0.0159519	0.0976021	0.0548934
C1QL4	31.7377	-1.07921	0.547509	-1.97113	0.0487087	0.194265	0.109259
C1QTNF1	439.822	0.547755	0.460728	1.18889	0.234483	0.472934	0.265987
C1QTNF3	62.9514	-1.65555	0.619437	-2.67267	0.00752495	0.0609913	0.0343027
C1QTNF6	34.9858	-1.31696	0.522197	-2.52197	0.0116701	0.0812635	0.0457042
C1QTNF9B-AS1	13.5094	0.181533	0.942018	0.192707	0.847189	0.929117	0.522554
C1R	407.376	0.830433	0.529568	1.56813	0.11685	0.31846	0.179108
C1RL-AS1	128.84	-0.566599	0.361263	-1.56838	0.116792	0.318422	0.179087
C1RL	267.742	-0.322344	0.362817	-0.888448	0.3743	0.613351	0.344961
C20orf166-AS1	22.432	-2.90887	1.70352	-1.70757	0.0877165	0.271779	0.152854
C20orf194	337.58	-0.0857531	0.249122	-0.344221	0.73068	0.863131	0.485442
C20orf196	69.7174	-0.0410704	0.295523	-0.138975	0.88947	0.947595	0.532947
C20orf24	1996.47	0.424172	0.175626	2.4152	0.0157267	0.0967225	0.0543987
C20orf27	1010.42	0.13498	0.250843	0.538107	0.590503	0.776953	0.436974
C20orf96	96.6743	-0.176235	0.344708	-0.511259	0.60917	0.789533	0.444049
C21orf2	400.853	0.153872	0.184688	0.83315	0.40476	0.639741	0.359804
C21orf33	598.811	0.0751622	0.276021	0.272306	0.785387	0.895657	0.503736
C21orf58	240.745	-1.14613	0.391875	-2.92473	0.00344752	0.0370059	0.0208129
C21orf59	681.999	-0.784967	0.324572	-2.41847	0.0155859	0.0963528	0.0541908
C21orf91	395.496	0.386155	0.203364	1.89884	0.0575855	0.214342	0.12055
C22orf23	484.079	-0.336503	0.179009	-1.87981	0.0601346	0.219523	0.123464
C22orf29	465.4	0.0248238	0.189353	0.131098	0.895698	0.951055	0.534893
C22orf34	68.89	0.687236	0.673412	1.02053	0.307478	0.55333	0.311204
C22orf39	206.977	-0.106801	0.26773	-0.398914	0.689956	0.836895	0.470687
C22orf46	401.607	-1.46287	0.296003	-4.94207	7.73e-07	9.56e-05	5.37e-05
C2CD2L	1065.7	0.380896	0.212206	1.79494	0.0726633	0.24323	0.136797
C2CD3	1163.06	-0.154617	0.198439	-0.779167	0.435882	0.663923	0.373403
C2CD4D	16.883	0.00544427	0.463683	0.0117414	0.990632	0.995704	0.560004
C2CD5	962.022	-0.699505	0.167464	-4.17705	2.95e-05	0.00128236	0.000721228
C2orf16	16.7994	-0.739009	0.593115	-1.24598	0.212772	0.448089	0.252015
C2orf42	357.329	0.559437	0.277126	2.01871	0.0435177	0.181334	0.101986
C2orf44	454.892	-0.617018	0.231479	-2.66555	0.00768636	0.0617754	0.0347437
C2orf47	219.696	-0.0382823	0.199429	-0.19196	0.847774	0.929302	0.522658
C2orf48	21.1396	-1.03599	0.496779	-2.08541	0.0370317	0.164308	0.0924099
C2orf49	406.239	0.0106313	0.134885	0.0788177	0.937178	0.972114	0.546737
C2orf68	732.502	-1.13901	0.294004	-3.87414	0.000107001	0.0032904	0.00185059
C2orf69	289.477	-0.135556	0.244698	-0.553974	0.579596	0.769823	0.432964
C2orf70	15.7956	-0.747429	0.511495	-1.46126	0.143943	0.359232	0.202039
C2orf72	25.8912	-0.480872	0.38864	-1.23732	0.215969	0.451371	0.25386
C2orf74	174.829	0.221195	0.336183	0.657959	0.510564	0.721213	0.405625
C2orf76	65.3135	0.647586	0.325096	1.99198	0.0463727	0.189036	0.106318
C2orf81	251.984	0.270415	0.310192	0.871766	0.383336	0.620912	0.349214
C2orf88	31.4314	-0.015463	0.645715	-0.0239471	0.980895	0.990991	0.557354
C3	2144.33	3.33529	0.698257	4.77659	1.78e-06	0.000172136	9.68e-05
C3AR1	71.764	-0.155443	0.801059	-0.194047	0.846139	0.928608	0.522268
C3orf14	189.515	0.175112	0.378152	0.463074	0.643311	0.811196	0.456233
C3orf17	1184.01	0.0809556	0.264177	0.306444	0.759266	0.881352	0.49569
C3orf18	96.7209	-0.286153	0.413991	-0.691205	0.489437	0.705313	0.396682
C3orf33	200.079	0.963984	0.3942	2.44542	0.0144685	0.092337	0.0519322
C3orf38	518.378	0.120342	0.175802	0.684531	0.49364	0.708661	0.398565
C3orf52	168.947	1.35693	0.34406	3.94386	8.02e-05	0.00267207	0.00150282
C3orf58	355.483	0.222965	0.298987	0.745733	0.455829	0.6812	0.383121
C3orf62	112.788	0.272683	0.251339	1.08492	0.277957	0.524728	0.295118
C3orf67	182.243	1.1524	0.377464	3.05301	0.00226561	0.0284043	0.0159752
C3orf70	208.165	0.0239726	0.206094	0.116319	0.9074	0.957303	0.538406
C3orf80	26.1941	0.208355	0.45236	0.460594	0.64509	0.8121	0.456741
C4orf19	302.763	-0.285118	0.54955	-0.518821	0.603886	0.785989	0.442056
C4orf27	181.599	-1.39826	0.239579	-5.8363	5.34e-09	1.7e-06	9.56e-07
C4orf29	108.839	-0.246147	0.298405	-0.824875	0.409442	0.643557	0.36195
C4orf3	665.791	0.636426	0.27012	2.35609	0.0184686	0.105777	0.0594912
C4orf32	403.091	0.133701	0.25	0.534803	0.592786	0.778885	0.438061
C4orf33	134.502	-0.0859449	0.362692	-0.236964	0.812685	0.91011	0.511864
C4orf46	257.179	-0.602257	0.266946	-2.2561	0.0240643	0.125579	0.0706284
C4orf48	316.957	0.171899	0.316994	0.542279	0.587626	0.775385	0.436092
C5	38.3247	-0.632687	0.681817	-0.927944	0.353437	0.596555	0.335514
C5AR1	21.49	-1.06244	0.848612	-1.25197	0.21058	0.445602	0.250616
C5orf15	2301.53	0.411272	0.172256	2.38757	0.0169603	0.100513	0.0565307
C5orf22	652.164	-0.788007	0.224137	-3.51575	0.000438521	0.00924119	0.00519743
C5orf24	2419.85	-0.00589607	0.180029	-0.0327507	0.973873	0.988361	0.555874
C5orf28	194.362	0.0392377	0.375329	0.104542	0.916739	0.961633	0.540842
C5orf30	428.458	-0.798086	0.249605	-3.1974	0.00138671	0.0204723	0.011514
C5orf34	173.992	-1.15412	0.41696	-2.76793	0.00564138	0.05123	0.0288128
C5orf42	845.119	-0.030016	0.201224	-0.149167	0.881422	0.9444	0.53115
C5orf45	94.749	-0.226897	0.318028	-0.713451	0.475567	0.69575	0.391304
C5orf51	1497.73	-0.0633224	0.141159	-0.448588	0.653729	0.816237	0.459068
C5orf56	12.4332	-0.0543573	0.561649	-0.0967816	0.9229	0.964291	0.542337
C5orf58	38.1122	-0.193564	0.60224	-0.321407	0.747902	0.874597	0.491891
C5orf63	14.2086	-3.12289	0.995481	-3.13706	0.00170649	0.0232178	0.0130582
C5orf66	71.935	-0.250949	0.316077	-0.793949	0.427225	0.657166	0.369604
C6orf1	385.561	-0.110831	0.182858	-0.606104	0.544445	0.745723	0.41941
C6orf106	1508.57	-0.442251	0.124696	-3.54663	0.000390193	0.00849515	0.00477785
C6orf120	1015.13	-0.161078	0.190738	-0.844502	0.398389	0.6351	0.357193
C6orf141	360.94	1.13584	0.358908	3.16469	0.00155246	0.0220048	0.0123759
C6orf203	149.448	-0.144332	0.301763	-0.478297	0.632439	0.803159	0.451713
C6orf226	52.3126	0.513001	0.402698	1.27391	0.202696	0.436392	0.245436
C6orf47	46.6957	0.724601	0.554058	1.30781	0.190939	0.421553	0.23709
C6orf48	36.4071	1.48734	0.728854	2.04065	0.0412858	0.175557	0.0987365
C6orf62	2260.82	0.178721	0.144607	1.23591	0.216493	0.451907	0.254162
C6orf89	1754.1	0.0225227	0.193108	0.116633	0.907151	0.957279	0.538393
C7orf13	83.0312	0.919095	0.364212	2.52351	0.0116188	0.0811399	0.0456347
C7orf25	453.833	0.326426	0.299764	1.08894	0.27618	0.522742	0.294
C7orf26	508.304	-0.529766	0.209474	-2.52903	0.0114378	0.0802253	0.0451203
C7orf31	107.695	-0.274881	0.385703	-0.712674	0.476048	0.696016	0.391453
C7orf43	658.716	-0.213757	0.287942	-0.742362	0.457868	0.682631	0.383925
C7orf49	811.51	-0.383243	0.165865	-2.31057	0.0208565	0.114248	0.0642555
C7orf50	1289.03	0.204962	0.166909	1.22799	0.219452	0.454574	0.255661
C7orf55	363.189	0.222552	0.456571	0.487442	0.625945	0.800145	0.450018
C7orf60	312.271	0.131603	0.31429	0.418731	0.675413	0.828369	0.465892
C7orf73	1065.57	0.0253273	0.173022	0.146382	0.88362	0.944812	0.531381
C8orf33	1479.3	0.0550261	0.24322	0.22624	0.821015	0.915148	0.514698
C8orf37	120.642	-0.139048	0.223449	-0.622284	0.533755	0.738854	0.415546
C8orf44-SGK3	51.11	2.37194	0.595539	3.98285	6.81e-05	0.0023916	0.00134508
C8orf44	35.6959	-0.876847	0.419556	-2.08994	0.0366235	0.162979	0.0916625
C8orf46	19.174	0.544872	0.435093	1.25231	0.210456	0.445471	0.250542
C8orf48	37.4914	0.244434	0.444997	0.549293	0.582804	0.771865	0.434113
C8orf58	403.406	0.0247622	0.279918	0.0884623	0.929509	0.96766	0.544232
C8orf59	538.886	-0.109359	0.319534	-0.342245	0.732167	0.864389	0.48615
C8orf76	506.855	-0.062955	0.222489	-0.282958	0.777209	0.891492	0.501393
C8orf82	450.869	-0.609863	0.343563	-1.77511	0.0758789	0.250137	0.140682
C8orf88	139.945	-0.732438	0.369103	-1.98438	0.047214	0.190637	0.107218
C9orf114	1092.79	-0.53132	0.170994	-3.10725	0.00188836	0.0248031	0.0139498
C9orf116	74.3623	0.590781	0.373377	1.58227	0.113589	0.313628	0.176391
C9orf117	61.8333	0.318178	0.227463	1.39881	0.16187	0.384103	0.216027
C9orf142	491.019	-0.342484	0.296444	-1.15531	0.247964	0.490114	0.27565
C9orf156	223.238	0.179425	0.317345	0.565394	0.571805	0.764304	0.42986
C9orf16	1151.51	0.396361	0.343799	1.15289	0.248957	0.491399	0.276373
C9orf163	34.035	0.623631	0.315152	1.97883	0.0478357	0.192174	0.108083
C9orf172	225.714	0.592011	0.340575	1.73827	0.0821641	0.262113	0.147418
C9orf3	688.282	0.197243	0.240079	0.821577	0.411318	0.645234	0.362892
C9orf40	327.49	-0.952234	0.349251	-2.7265	0.00640094	0.0550243	0.0309468
C9orf43	20.1913	0.89373	0.450977	1.98177	0.0475055	0.191427	0.107662
C9orf64	115.345	-1.40144	0.493532	-2.8396	0.00451695	0.0443289	0.0249315
C9orf69	1810.12	0.513449	0.151253	3.39463	0.000687225	0.0125896	0.00708067
C9orf72	416.567	-0.109904	0.56667	-0.193947	0.846218	0.928608	0.522268
C9orf78	1445.83	-0.14373	0.141417	-1.01636	0.30946	0.555292	0.312307
C9orf85	262.203	-0.543499	0.430075	-1.26373	0.206327	0.440254	0.247608
C9orf89	825.489	-0.0151481	0.37923	-0.0399444	0.968137	0.985499	0.554264
C9orf9	111.198	0.381789	0.272186	1.40268	0.160713	0.382626	0.215196
C9orf91	448.241	-0.320459	0.203696	-1.57322	0.115667	0.316682	0.178108
CA11	162.985	0.377151	0.416786	0.904905	0.365516	0.606892	0.341328
CA12	24.1058	-0.311505	0.590038	-0.527941	0.59754	0.782129	0.439885
CA13	47.6769	-0.180002	0.422687	-0.425852	0.670215	0.825386	0.464214
CA5B	390.151	-0.848533	0.308793	-2.7479	0.00599775	0.0532514	0.0299497
CA5BP1	169.534	-0.474165	0.338363	-1.40135	0.161109	0.383081	0.215452
CA9	58.3683	1.56105	0.637924	2.44708	0.014402	0.0922165	0.0518644
CAAP1	720.835	-0.402114	0.22034	-1.82497	0.0680052	0.234484	0.131878
CAB39	2075.98	0.0121055	0.190637	0.0635003	0.949368	0.97786	0.549968
CAB39L	105.787	0.807447	0.37144	2.17383	0.0297179	0.142877	0.0803567
CABIN1	1650.11	-0.277644	0.122639	-2.26392	0.023579	0.124041	0.0697632
CABLES1	312.465	-0.303491	0.498163	-0.60922	0.542379	0.743621	0.418228
CABLES2	328.322	0.469204	0.322505	1.45488	0.145703	0.361321	0.203214
CABYR	97.0243	0.305487	0.224074	1.36333	0.172778	0.397927	0.223802
CACFD1	186.372	0.185681	0.343086	0.541208	0.588364	0.775803	0.436327
CACHD1	313.204	-0.420749	0.252937	-1.66345	0.0962217	0.285833	0.160758
CACNA1A	86.5463	0.522895	0.318141	1.6436	0.10026	0.29273	0.164637
CACNA1D	166.082	0.15842	0.52197	0.303504	0.761506	0.882563	0.496371
CACNA1E	18.0318	1.41839	0.682065	2.07956	0.0375663	0.165486	0.0930725
CACNA2D1	522.604	-0.106386	1.15635	-0.0920015	0.926697	0.965975	0.543284
CACNA2D2	84.08	1.02855	0.833297	1.23431	0.217087	0.452487	0.254488
CACNA2D3	131.765	1.91851	0.623033	3.0793	0.00207488	0.0267055	0.0150197
CACNB1	164.187	-0.0445772	0.384129	-0.116047	0.907615	0.957389	0.538455
CACNB2	17.89	-0.767012	0.421981	-1.81764	0.0691187	0.237068	0.133332
CACNB3	306.485	-1.30425	0.480514	-2.71427	0.00664215	0.0562661	0.0316452
CACNB4	14.3524	0.188451	0.49695	0.379215	0.704528	0.845765	0.475675
CACNG4	44.1656	1.5237	0.694075	2.19529	0.0281426	0.138633	0.07797
CACNG6	43.7798	-1.4699	0.9106	-1.61421	0.106483	0.303239	0.170548
CACNG7	33.6941	-0.0910941	0.587174	-0.15514	0.876711	0.942693	0.53019
CACNG8	334.947	-1.75901	0.508883	-3.45661	0.000547023	0.0107088	0.00602285
CACTIN-AS1	25.1834	0.0700227	0.565172	0.123896	0.901397	0.954061	0.536583
CACTIN	974.021	0.0386281	0.195089	0.198003	0.843043	0.926513	0.52109
CACUL1	1723.1	-0.188645	0.113296	-1.66506	0.0959	0.28535	0.160487
CACYBP	4106.28	-0.0334279	0.188028	-0.177781	0.858895	0.935469	0.526127
CAD	4654.84	-0.283315	0.177828	-1.5932	0.111116	0.310327	0.174534
CADM1	2154.87	0.216135	0.308578	0.700421	0.483664	0.700746	0.394114
CADM2	57.8681	0.548755	0.700777	0.783066	0.433588	0.662367	0.372529
CADM3	147.024	0.488854	0.459476	1.06394	0.287357	0.533417	0.300004
CADM4	6326.05	1.17389	0.31932	3.67623	0.000236709	0.00588896	0.00331207
CADPS2	191.944	-1.34716	1.0829	-1.24403	0.213487	0.4491	0.252583
CAHM	17.5853	0.0769803	0.483178	0.159321	0.873416	0.941563	0.529554
CALB2	287.739	0.701403	0.652109	1.07559	0.28211	0.528933	0.297483
CALCOCO1	1477.09	0.538307	0.339909	1.58368	0.113266	0.31304	0.17606
CALCOCO2	2127.68	0.0999505	0.169114	0.591026	0.554503	0.752615	0.423286
CALCRL	20.3591	0.287107	0.527924	0.543841	0.586551	0.774659	0.435684
CALD1	3040.36	0.0508956	0.0961809	0.529165	0.596691	0.781672	0.439628
CALHM2	686.665	-0.322988	0.310304	-1.04087	0.297934	0.543632	0.30575
CALM1	3510.38	0.20943	0.164067	1.27649	0.201783	0.43554	0.244956
CALM2	5549.77	-0.154421	0.184937	-0.834988	0.403724	0.639093	0.359439
CALM3	4415.74	0.0183266	0.189647	0.0966353	0.923016	0.964335	0.542362
CALML4	146.591	-0.762283	0.243408	-3.13171	0.00173793	0.0234913	0.013212
CALR	24793.2	0.549368	0.224959	2.44208	0.0146029	0.0928804	0.0522378
CALU	12187	0.530209	0.169098	3.13552	0.0017155	0.0232795	0.0130928
CAMK1	76.3483	0.701284	0.621843	1.12775	0.259425	0.503189	0.283004
CAMK1D	49.7743	1.28192	0.905149	1.41625	0.156701	0.376813	0.211927
CAMK2A	24.5869	1.53784	0.685806	2.24239	0.0249365	0.128447	0.0722412
CAMK2B	28.4322	2.29985	0.627061	3.66767	0.000244772	0.00600614	0.00337797
CAMK2D	1123.56	-0.160798	0.209422	-0.767821	0.442594	0.670002	0.376822
CAMK2G	641.486	0.0804848	0.20757	0.387748	0.698203	0.843115	0.474185
CAMK2N1	1008.32	0.396595	0.339356	1.16867	0.242537	0.483858	0.272132
CAMK2N2	72.2682	-0.233086	0.661864	-0.352165	0.724714	0.859172	0.483216
CAMK4	541.262	-0.481576	0.238673	-2.01772	0.0436204	0.181393	0.102019
CAMKK1	105.28	0.51888	0.347297	1.49405	0.135161	0.347233	0.195291
CAMKK2	843.678	-0.312417	0.20277	-1.54075	0.123379	0.328458	0.184731
CAMKMT	93.2677	-0.39184	0.266548	-1.47005	0.141547	0.356132	0.200296
CAMLG	1354.02	0.179318	0.243091	0.73766	0.460721	0.68501	0.385264
CAMP	19.8966	0.336643	0.629611	0.534685	0.592868	0.778885	0.438061
CAMSAP1	1693.95	0.0796062	0.133217	0.597566	0.550129	0.749843	0.421727
CAMSAP2	3461.99	0.105153	0.129369	0.812812	0.416326	0.648825	0.364913
CAMTA1	419.316	-0.292313	0.299016	-0.97758	0.328282	0.574155	0.322916
CAMTA2	1514.23	0.0644364	0.130459	0.493919	0.621363	0.797203	0.448363
CAND1	4714.21	-0.153815	0.151258	-1.0169	0.3092	0.554894	0.312084
CAND2	54.8184	-0.581074	0.562166	-1.03363	0.301308	0.547034	0.307663
CANT1	2031.46	0.149312	0.176572	0.845616	0.397767	0.634532	0.356874
CANX	21453.3	0.3338	0.144178	2.3152	0.0206019	0.113374	0.0637637
CAP1	8113.79	0.135338	0.0911849	1.48422	0.13775	0.351067	0.197447
CAP2	251.513	-0.458516	0.398436	-1.15079	0.249819	0.492599	0.277048
CAPG	1902.97	0.597172	0.416387	1.43418	0.151522	0.369807	0.207987
CAPN1	2673.97	0.0708653	0.160448	0.441671	0.658727	0.818661	0.460431
CAPN10-AS1	47.4569	0.0492664	0.354077	0.13914	0.889339	0.947595	0.532947
CAPN10	456.456	0.177498	0.165936	1.06968	0.284764	0.531199	0.298757
CAPN12	45.9852	-1.88807	0.399877	-4.72162	2.34e-06	0.000213555	0.000120107
CAPN15	2032.85	-0.0757657	0.186995	-0.405175	0.685349	0.833776	0.468932
CAPN2	6799.53	0.18396	0.188866	0.974024	0.330045	0.575931	0.323915
CAPN3	59.1621	1.6385	0.567538	2.88703	0.00388894	0.0400718	0.0225372
CAPN5	2653.26	0.29166	0.433672	0.672536	0.501243	0.714494	0.401846
CAPN7	1313.43	0.265878	0.191697	1.38697	0.165451	0.388547	0.218527
CAPNS1	4986.11	0.246989	0.106396	2.3214	0.0202651	0.112297	0.0631578
CAPRIN1	11298	-0.0913021	0.151558	-0.602423	0.546893	0.747731	0.420539
CAPRIN2	1010.12	0.426492	0.310266	1.3746	0.169256	0.393404	0.221258
CAPS	2683.83	-0.0165379	0.75366	-0.0219434	0.982493	0.991589	0.55769
CAPZA1	4292.02	-0.211647	0.197085	-1.07389	0.282872	0.529738	0.297936
CAPZA2	1835.82	0.0554754	0.338352	0.163958	0.869764	0.939736	0.528527
CAPZB	3462.11	-0.0369608	0.127419	-0.290074	0.77176	0.887945	0.499398
CARD10	641.881	-0.155281	0.410383	-0.37838	0.705148	0.846367	0.476014
CARD11	40.1371	-2.17589	1.05331	-2.06577	0.0388504	0.169269	0.0952003
CARD14	89.0866	-0.777106	0.499319	-1.55633	0.119629	0.323121	0.18173
CARD6	262.191	0.607023	0.34643	1.75222	0.0797355	0.257518	0.144834
CARD8-AS1	36.5226	-0.288988	0.406627	-0.710697	0.477272	0.696751	0.391867
CARD8	214.63	-1.29395	0.260655	-4.96421	6.9e-07	8.91e-05	5.01e-05
CARD9	43.4451	-0.345736	0.474186	-0.729115	0.465931	0.689297	0.387674
CARF	121.8	0.128917	0.37371	0.344966	0.73012	0.862683	0.485191
CARHSP1	1736.77	-0.191985	0.238376	-0.805387	0.420596	0.652674	0.367077
CARKD	941.123	-0.488086	0.273529	-1.7844	0.0743585	0.247344	0.139111
CARM1	3539.99	-0.384789	0.143531	-2.68087	0.007343	0.0598626	0.033668
CARNMT1	430.625	-0.0443365	0.188382	-0.235355	0.813934	0.911195	0.512475
CARNS1	174.381	2.36811	0.747482	3.16812	0.00153429	0.0217976	0.0122594
CARS	479.875	-0.349638	0.375442	-0.931271	0.351714	0.594978	0.334627
CARS2	1371.13	-0.170109	0.186891	-0.910204	0.362715	0.604426	0.339941
CASC10	83.7133	-0.541998	0.565032	-0.959234	0.337441	0.581643	0.327128
CASC2	53.3058	0.67549	0.327019	2.0656	0.0388662	0.169287	0.0952102
CASC3	3205.15	-0.301798	0.173962	-1.73485	0.0827676	0.262693	0.147744
CASC4	2566.54	-0.1348	0.172301	-0.782353	0.434007	0.662367	0.372529
CASC5	1355.05	-1.26344	0.606321	-2.08378	0.0371801	0.164753	0.0926602
CASC9	92.6133	0.275731	0.374725	0.735824	0.461838	0.686041	0.385843
CASD1	251.172	-0.662534	0.217106	-3.05166	0.00227577	0.0284716	0.016013
CASK	992.863	0.51879	0.217906	2.3808	0.0172751	0.101622	0.0571544
CASKIN1	125.265	-0.557853	0.617798	-0.902971	0.366541	0.608161	0.342042
CASKIN2	490.063	-0.794926	0.231387	-3.43549	0.000591488	0.0113925	0.00640738
CASP10	88.5722	-0.394802	0.377879	-1.04479	0.296122	0.541897	0.304774
CASP2	1127.89	-0.332637	0.308164	-1.07942	0.280402	0.527484	0.296668
CASP3	836.814	-0.301902	0.243961	-1.2375	0.215902	0.451371	0.25386
CASP4	615.464	-0.321521	0.308629	-1.04177	0.297517	0.543632	0.30575
CASP6	181.06	-0.143815	0.277046	-0.519099	0.603691	0.785989	0.442056
CASP7	670.574	0.0109187	0.186656	0.0584962	0.953353	0.980025	0.551186
CASP8	763.892	0.161817	0.183852	0.880146	0.37878	0.616879	0.346945
CASP8AP2	633.968	-0.825547	0.180981	-4.56152	5.08e-06	0.000372966	0.000209763
CASP9	541.634	0.467694	0.322015	1.4524	0.146391	0.362653	0.203963
CAST	4665.77	-0.210495	0.170359	-1.2356	0.216609	0.452017	0.254224
CASZ1	51.4371	-0.726944	0.453478	-1.60304	0.108926	0.306904	0.172609
CAT	1897.18	-0.11846	0.233771	-0.506734	0.612342	0.791383	0.44509
CATSPER1	177.402	-0.380526	0.460388	-0.826533	0.408502	0.642431	0.361316
CATSPER2	19.7158	0.394781	0.498039	0.79267	0.42797	0.657895	0.370013
CATSPER2P1	29.7828	0.365823	0.384654	0.951044	0.341582	0.584706	0.32885
CAV1	1889.76	-0.748971	0.915634	-0.817982	0.413368	0.646469	0.363587
CAV2	234.669	-0.590922	0.524868	-1.12585	0.260229	0.504476	0.283727
CBARP	168.307	-0.264213	0.376105	-0.702499	0.482368	0.700055	0.393725
CBFA2T2	658.869	-0.305711	0.155051	-1.97168	0.0486461	0.194232	0.10924
CBFB	2070.33	-0.0193182	0.144831	-0.133384	0.89389	0.950022	0.534312
CBL	3333.83	-0.313549	0.203059	-1.54413	0.122558	0.327499	0.184192
CBLB	438.901	0.069633	0.379289	0.183588	0.854336	0.932844	0.52465
CBLL1	827.084	-0.32367	0.218724	-1.47981	0.138924	0.352414	0.198205
CBLN1	18.0175	0.129875	0.447964	0.289924	0.771875	0.887945	0.499398
CBLN3	44.219	1.17326	0.76843	1.52682	0.126805	0.333478	0.187555
CBR1	1396.08	0.296197	0.144666	2.04745	0.0406139	0.17399	0.0978556
CBR3-AS1	37.0571	0.250305	0.367594	0.680929	0.495917	0.710329	0.399504
CBR3	201.658	-0.0585532	0.444232	-0.131808	0.895136	0.950805	0.534752
CBR4	469.299	-0.188637	0.169086	-1.11563	0.264581	0.508853	0.286189
CBS	101.732	-1.22408	0.548922	-2.22998	0.0257489	0.131077	0.0737204
CBWD1	628.009	0.308412	0.229713	1.3426	0.179403	0.407166	0.228998
CBWD2	238.256	0.0385992	0.268875	0.143558	0.885849	0.945788	0.53193
CBWD3	27.5967	0.528232	0.437266	1.20803	0.227034	0.463976	0.26095
CBWD5	310.371	0.193941	0.262496	0.738835	0.460007	0.684162	0.384787
CBWD6	96.8326	0.434288	0.289613	1.49954	0.133733	0.344861	0.193957
CBX1	1720.6	-0.27541	0.21038	-1.30911	0.190497	0.421173	0.236876
CBX2	919.707	-0.728459	0.235942	-3.08745	0.00201881	0.0261569	0.0147112
CBX3	5837.68	-0.0956973	0.191587	-0.499498	0.617429	0.794601	0.4469
CBX3P2	21.728	-0.362247	0.462869	-0.782613	0.433855	0.662367	0.372529
CBX4	1347.92	0.169943	0.0965468	1.76021	0.0783725	0.254883	0.143351
CBX5	5658.22	-0.214867	0.207213	-1.03693	0.299766	0.545547	0.306827
CBX6	4022.02	-0.0115713	0.142163	-0.0813944	0.935128	0.970902	0.546055
CBX7	299.923	-0.0436306	0.275148	-0.158572	0.874006	0.941696	0.529629
CBX8	297.003	0.0329724	0.120202	0.274308	0.783848	0.895105	0.503425
CBY1	234.987	0.167228	0.381624	0.438202	0.66124	0.820467	0.461447
CC2D1A	1323.23	-0.364772	0.159977	-2.28015	0.0225988	0.120512	0.0677786
CC2D1B	1590.68	0.243565	0.148704	1.63792	0.101438	0.295088	0.165963
CC2D2A	642.169	0.125928	0.151666	0.830293	0.406373	0.640771	0.360382
CCAR1	2046.94	-0.0532187	0.14162	-0.375786	0.707076	0.847845	0.476845
CCAR2	3546.69	-0.148341	0.11647	-1.27364	0.20279	0.436465	0.245477
CCBE1	111.383	-1.42746	1.47811	-0.965734	0.334177	0.579402	0.325868
CCBL1	197.292	-1.07358	0.359677	-2.98484	0.00283725	0.032877	0.0184907
CCBL2	339.282	0.455278	0.314854	1.44599	0.148179	0.36516	0.205373
CCDC101	189.774	-0.0752362	0.269283	-0.279394	0.779942	0.893054	0.502272
CCDC102A	444.826	-0.106003	0.282096	-0.375768	0.707089	0.847845	0.476845
CCDC102B	377.724	-1.32172	0.240258	-5.50126	3.77e-08	8.19e-06	4.6e-06
CCDC103	127.253	0.705464	0.30374	2.32259	0.0202013	0.112073	0.0630321
CCDC106	556.009	-0.0968108	0.240821	-0.402003	0.687682	0.835621	0.46997
CCDC107	123.164	0.700151	0.262295	2.66933	0.00760037	0.0613942	0.0345293
CCDC109B	354.377	-0.155986	0.173436	-0.899389	0.368446	0.609402	0.34274
CCDC112	300.872	0.144657	0.235246	0.614919	0.538608	0.741213	0.416873
CCDC113	311.269	0.827573	0.263369	3.14226	0.0016765	0.0230627	0.0129709
CCDC115	281.306	0.277922	0.210444	1.32065	0.186619	0.41654	0.234271
CCDC117	678.357	-0.200226	0.187217	-1.06948	0.284853	0.531276	0.298801
CCDC12	360.364	0.0663739	0.22093	0.300429	0.76385	0.883737	0.497032
CCDC120	103.174	-0.301388	0.443156	-0.680095	0.496444	0.710765	0.399749
CCDC121	44.8836	-0.725438	0.406826	-1.78316	0.0745596	0.247516	0.139208
CCDC122	77.3292	0.411139	0.522558	0.786782	0.431409	0.660532	0.371496
CCDC124	1862.55	0.0922189	0.253596	0.363645	0.716123	0.853251	0.479885
CCDC125	34.3638	-0.366043	0.367762	-0.995325	0.319578	0.566216	0.318451
CCDC126	128.1	-0.136582	0.279534	-0.488608	0.625119	0.799604	0.449713
CCDC127	325.128	0.314511	0.273543	1.14977	0.25024	0.492792	0.277156
CCDC130	799.089	0.255377	0.267881	0.953322	0.340427	0.5835	0.328172
CCDC134	83.1793	-0.754515	0.354621	-2.12767	0.0333646	0.154082	0.0866586
CCDC136	211.546	-1.09621	0.462337	-2.37102	0.0177392	0.10363	0.0582834
CCDC137	1365.97	-0.460983	0.178344	-2.58479	0.00974381	0.0720823	0.0405406
CCDC138	212.136	-0.389403	0.351612	-1.10748	0.268087	0.513505	0.288805
CCDC14	835.998	-1.66629	0.346725	-4.80581	1.54e-06	0.000156641	8.81e-05
CCDC142	458.746	0.112351	0.172744	0.650389	0.515441	0.724286	0.407353
CCDC144A	35.387	-0.299235	0.396985	-0.753769	0.450988	0.676081	0.380241
CCDC144B	411.525	-0.283336	0.302344	-0.937133	0.34869	0.591904	0.332899
CCDC144NL-AS1	462.642	-0.487432	0.269685	-1.80741	0.0706977	0.239875	0.13491
CCDC144NL	64.0466	-0.784177	0.555237	-1.41233	0.157853	0.378519	0.212887
CCDC146	30.2798	0.741801	0.534447	1.38798	0.165144	0.388398	0.218443
CCDC149	406.074	-0.831796	0.584409	-1.42331	0.154646	0.373861	0.210267
CCDC15	150.933	-1.18134	0.468132	-2.52351	0.0116189	0.0811399	0.0456347
CCDC150	48.53	-0.521607	0.397877	-1.31097	0.189867	0.420537	0.236519
CCDC151	57.6191	0.719837	0.372728	1.93126	0.0534503	0.204496	0.115013
CCDC152	92.386	2.01883	0.839779	2.404	0.0162166	0.0983604	0.0553198
CCDC157	38.924	0.211335	0.370674	0.570136	0.568585	0.762174	0.428662
CCDC159	88.8095	1.0926	0.420856	2.59615	0.00942749	0.0705302	0.0396676
CCDC163P	139.908	0.103919	0.273899	0.379408	0.704385	0.84567	0.475622
CCDC167	178.306	0.17285	0.238537	0.724628	0.46868	0.691464	0.388893
CCDC168	15.1393	1.28192	0.822819	1.55796	0.119243	0.32259	0.181431
CCDC17	14.7128	-0.608298	0.461275	-1.31873	0.187259	0.417394	0.234751
CCDC171	169.883	0.160836	0.288863	0.556788	0.577672	0.76838	0.432152
CCDC174	432.667	0.213811	0.156537	1.36588	0.171976	0.397072	0.223321
CCDC176	47.0661	1.38168	0.384669	3.59187	0.000328317	0.0074917	0.00421348
CCDC18	190.433	-0.660222	0.339713	-1.94347	0.0519592	0.201291	0.11321
CCDC181	182.209	0.501579	0.339444	1.47765	0.139502	0.35338	0.198748
CCDC183-AS1	100.345	0.235594	0.427737	0.550791	0.581777	0.770994	0.433623
CCDC183	62.1041	0.446933	0.482974	0.925377	0.35477	0.597468	0.336028
CCDC184	63.1011	-0.317939	0.458984	-0.692702	0.488497	0.704454	0.396199
CCDC186	577.941	0.553914	0.22392	2.47372	0.0133715	0.0884805	0.0497632
CCDC22	492.914	-0.0116566	0.159685	-0.0729976	0.941808	0.973886	0.547733
CCDC24	79.2154	-0.459456	0.481681	-0.953859	0.340155	0.583344	0.328084
CCDC25	966.361	-0.495348	0.235582	-2.10265	0.0354961	0.160006	0.0899905
CCDC28A	267.931	-0.653994	0.302698	-2.16055	0.0307299	0.145863	0.0820361
CCDC28B	364.678	-0.123455	0.187404	-0.658764	0.510047	0.721133	0.40558
CCDC34	271.341	-0.225763	0.470231	-0.48011	0.631149	0.802659	0.451432
CCDC39	18.0898	-0.236055	0.545214	-0.432958	0.665046	0.822133	0.462384
CCDC40	93.2952	-0.230366	0.453814	-0.507622	0.611719	0.791194	0.444984
CCDC42B	29.9627	1.00686	0.584788	1.72175	0.0851147	0.267073	0.150207
CCDC43	804.638	0.0176787	0.122913	0.143831	0.885634	0.945688	0.531874
CCDC47	3163.74	0.197449	0.148496	1.32966	0.18363	0.412319	0.231897
CCDC50	1393.57	-0.695461	0.329908	-2.10805	0.0350269	0.158889	0.0893621
CCDC51	593.833	-0.188751	0.227069	-0.83125	0.405833	0.640404	0.360176
CCDC53	292.69	-0.0520915	0.17787	-0.292863	0.769627	0.887197	0.498978
CCDC57	332.989	-0.226424	0.539218	-0.419912	0.67455	0.827559	0.465436
CCDC58	406.101	0.248964	0.248397	1.00228	0.316207	0.561981	0.316069
CCDC59	751.967	-0.0111097	0.189144	-0.058737	0.953162	0.979969	0.551154
CCDC6	1588.95	-0.111568	0.0963539	-1.1579	0.246905	0.488964	0.275003
CCDC61	96.6889	-1.08475	0.34008	-3.1897	0.00142421	0.0207197	0.0116532
CCDC62	21.3209	1.48626	0.6773	2.19439	0.0282077	0.138858	0.0780967
CCDC64	110.326	2.20592	0.725944	3.03868	0.00237613	0.0292526	0.0164522
CCDC65	22.7905	-0.1155	0.382685	-0.301815	0.762793	0.883355	0.496816
CCDC66	296.554	0.144355	0.439219	0.328663	0.74241	0.870601	0.489643
CCDC69	153.623	0.6333	0.602887	1.05045	0.293513	0.539194	0.303254
CCDC7	38.4178	-0.409923	0.361811	-1.13298	0.257224	0.500979	0.281761
CCDC71	533.815	-0.785029	0.289409	-2.71253	0.00667724	0.0564615	0.0317551
CCDC71L	748.649	0.539546	0.321454	1.67846	0.0932581	0.281172	0.158137
CCDC73	17.4138	-0.0206566	0.391171	-0.0528071	0.957886	0.981799	0.552183
CCDC74A	93.5785	0.195777	0.414139	0.472733	0.636404	0.805704	0.453144
CCDC74B	267.364	0.457589	0.389226	1.17564	0.239739	0.480014	0.26997
CCDC77	653.327	-0.69029	0.192134	-3.59275	0.000327203	0.00747819	0.00420589
CCDC78	187.042	-0.75844	0.451552	-1.67963	0.0930297	0.281011	0.158046
CCDC80	151.738	0.180079	0.398672	0.451698	0.651487	0.815002	0.458374
CCDC82	401.325	-0.795968	0.30651	-2.59687	0.00940775	0.0704353	0.0396142
CCDC84	168.908	0.0031381	0.23276	0.0134821	0.989243	0.995193	0.559717
CCDC85B	3863.58	0.451258	0.211001	2.13865	0.0324636	0.151286	0.0850862
CCDC85C	534.451	-0.60187	0.415405	-1.44887	0.147373	0.364243	0.204858
CCDC86	2022.2	0.211623	0.217942	0.971006	0.331545	0.577003	0.324518
CCDC87	18.2604	0.939472	0.523205	1.79561	0.0725568	0.242987	0.136661
CCDC88A	1956.56	-0.443685	0.143691	-3.08777	0.00201667	0.0261528	0.0147089
CCDC88B	37.0487	0.0509897	0.51996	0.0980646	0.921881	0.963901	0.542117
CCDC88C	51.4422	-0.353173	0.630804	-0.559877	0.575563	0.76697	0.431359
CCDC9	426.342	-0.138585	0.222146	-0.623845	0.53273	0.737729	0.414913
CCDC90B	1197.07	0.404576	0.17963	2.25227	0.024305	0.126424	0.0711033
CCDC91	404.598	-0.788486	0.192328	-4.0997	4.14e-05	0.00165166	0.000928929
CCDC92	57.1969	0.0288722	0.437887	0.0659352	0.947429	0.976883	0.549419
CCDC93	581.893	-0.663575	0.201437	-3.29421	0.000986976	0.016072	0.00903922
CCDC94	345.791	-0.189681	0.426749	-0.44448	0.656696	0.817447	0.459749
CCDC96	32.4075	0.347499	0.30879	1.12536	0.260438	0.504607	0.283801
CCDC97	1063.34	-0.00393488	0.148716	-0.0264591	0.978891	0.990224	0.556922
CCHE1	53.325	1.59333	0.662711	2.40426	0.0162053	0.0983575	0.0553183
CCL28	181.31	-0.0225986	0.25398	-0.088978	0.929099	0.967525	0.544156
CCM2	483.635	0.022239	0.195585	0.113705	0.909472	0.957888	0.538736
CCNA1	248.38	1.44385	0.904228	1.59678	0.110315	0.308873	0.173716
CCNA2	1100.18	-1.13737	0.737906	-1.54135	0.123232	0.32842	0.18471
CCNB1	2829.95	-0.753511	0.442368	-1.70336	0.0885009	0.272852	0.153458
CCNB1IP1	828.415	-0.45294	0.242371	-1.86879	0.0616523	0.223001	0.12542
CCNB2	1077.86	-0.781333	0.609757	-1.28138	0.200059	0.433727	0.243937
CCNB3	53.1614	1.6894	0.440319	3.83677	0.000124664	0.00367578	0.00206733
CCNC	922.047	-0.0414317	0.159604	-0.25959	0.79518	0.899653	0.505983
CCND1	19381.6	0.462901	0.196241	2.35883	0.0183325	0.105208	0.0591713
CCND2	38.4408	0.726031	0.557656	1.30193	0.192939	0.424378	0.238678
CCND3	883.542	-0.0509701	0.238721	-0.213514	0.830926	0.92061	0.51777
CCNDBP1	818.816	0.0366312	0.329347	0.111224	0.911439	0.958881	0.539294
CCNE1	394.17	0.0562857	0.267186	0.210662	0.833151	0.921935	0.518515
CCNE2	365.602	-0.712016	0.416706	-1.70867	0.0875112	0.271542	0.152721
CCNF	1087.67	-1.10721	0.590009	-1.8766	0.0605732	0.22038	0.123946
CCNG1	3263.98	0.093203	0.179713	0.51862	0.604025	0.786023	0.442075
CCNG2	436.301	-0.369205	0.341891	-1.07989	0.280191	0.527474	0.296662
CCNH	861.548	-0.235765	0.17335	-1.36005	0.173814	0.39948	0.224676
CCNI	3710.3	-0.0847183	0.16642	-0.509062	0.610709	0.790666	0.444687
CCNJ	369.109	0.0383376	0.242145	0.158325	0.874201	0.941696	0.529629
CCNJL	611.924	-0.566255	0.328379	-1.7244	0.084636	0.266147	0.149687
CCNK	1069.66	0.0993829	0.193468	0.513691	0.607468	0.788569	0.443507
CCNL1	1120.41	0.203736	0.380201	0.535864	0.592052	0.778287	0.437725
CCNL2	2523.1	-0.224485	0.296088	-0.758171	0.448349	0.673957	0.379047
CCNO	316.745	-0.343023	0.238201	-1.44005	0.149852	0.367766	0.206839
CCNT1	2806.52	-0.21062	0.118644	-1.77523	0.0758601	0.250132	0.14068
CCNT2-AS1	18.7691	-0.137946	0.361497	-0.381596	0.702761	0.845202	0.475359
CCNT2	579.125	0.178334	0.192562	0.926113	0.354387	0.597142	0.335845
CCNY	1136.95	-0.38161	0.11078	-3.44476	0.000571558	0.0110831	0.00623337
CCNYL1	553.909	0.0767635	0.228164	0.336441	0.736539	0.867264	0.487767
CCNYL2	74.2685	0.112473	0.371843	0.302475	0.76229	0.883191	0.496724
CCP110	1331.87	-0.37458	0.199018	-1.88215	0.0598162	0.218732	0.12302
CCPG1	1965	0.0800541	0.220903	0.362395	0.717057	0.854079	0.480351
CCS	433.61	0.407754	0.259015	1.57425	0.11543	0.316395	0.177947
CCSAP	1365.7	-0.502289	0.365452	-1.37443	0.169307	0.393404	0.221258
CCSER1	40.7456	0.488292	0.478338	1.02081	0.307345	0.553159	0.311108
CCSER2	1203.36	-0.0217601	0.179553	-0.121191	0.90354	0.955487	0.537385
CCT2	6573.5	-0.328698	0.216445	-1.51862	0.128858	0.337141	0.189615
CCT3	10947.7	-0.0570943	0.202293	-0.282236	0.777763	0.89178	0.501555
CCT4	7959.98	-0.265691	0.21043	-1.26261	0.20673	0.440839	0.247937
CCT5	10041	-0.346492	0.265328	-1.3059	0.191587	0.422259	0.237487
CCT6A	8737.47	-0.128597	0.19761	-0.650763	0.5152	0.724105	0.407251
CCT6B	32.7849	2.23834	0.625797	3.57679	0.000347843	0.00783741	0.00440792
CCT6P1	149.05	-0.053188	0.189884	-0.280108	0.779395	0.892779	0.502117
CCT6P3	34.7805	-0.156533	0.359202	-0.435781	0.662996	0.82122	0.461871
CCT7	8891.19	-0.211777	0.188913	-1.12103	0.262275	0.50681	0.28504
CCT8	5075.14	-0.16438	0.206425	-0.796319	0.425847	0.655959	0.368924
CCZ1	332.719	-1.07796	0.225371	-4.78306	1.73e-06	0.000169583	9.54e-05
CCZ1B	457.755	-0.899307	0.169638	-5.30134	1.15e-07	2.06e-05	1.16e-05
CD101	24.7862	1.1346	0.538589	2.10662	0.0351509	0.159191	0.0895324
CD109	8614.55	0.310802	0.297065	1.04624	0.29545	0.541198	0.304381
CD151	4573.87	0.607593	0.2119	2.86736	0.00413911	0.0416527	0.0234263
CD163L1	243.019	4.24478	0.602488	7.04543	1.85e-12	1.77e-09	9.93e-10
CD164	3052.93	0.21346	0.17892	1.19305	0.23285	0.471516	0.26519
CD1D	61.4285	-0.435467	0.751928	-0.579134	0.562499	0.758288	0.426477
CD200	45.5106	-0.987465	0.658265	-1.5001	0.133588	0.344666	0.193847
CD22	268.681	0.0955064	0.446947	0.213686	0.830792	0.920603	0.517766
CD24	33.6627	0.302483	0.564872	0.53549	0.592311	0.778493	0.43784
CD27-AS1	203.243	-0.503944	0.384405	-1.31097	0.189867	0.420537	0.236519
CD274	127.681	0.566974	0.723337	0.783832	0.433139	0.662067	0.37236
CD276	4159.8	0.286823	0.234636	1.22242	0.221551	0.457044	0.257051
CD2AP	821.98	-0.0901122	0.115151	-0.782558	0.433887	0.662367	0.372529
CD2BP2	2345.64	-0.440352	0.237306	-1.85563	0.063506	0.226597	0.127443
CD302	379.436	-0.405793	0.498517	-0.814001	0.415644	0.648238	0.364582
CD320	1883	0.253585	0.235843	1.07523	0.282272	0.529112	0.297583
CD37	25.3484	-0.948535	0.526939	-1.80008	0.0718474	0.24202	0.136117
CD3EAP	398.662	-0.449332	0.258708	-1.73683	0.0824173	0.262323	0.147536
CD4	23.7776	0.450119	0.473297	0.951028	0.34159	0.584706	0.32885
CD40	174.141	0.187109	0.421161	0.444269	0.656848	0.817495	0.459775
CD44	20156.2	0.077245	0.137972	0.55986	0.575575	0.76697	0.431359
CD46	3042.24	-0.0980034	0.163172	-0.600614	0.548097	0.748543	0.420996
CD47	1654.98	0.381064	0.23036	1.65421	0.0980849	0.288912	0.16249
CD55	8540.39	1.50826	0.556465	2.71042	0.00671975	0.0567437	0.0319138
CD58	521.124	0.030478	0.253379	0.120286	0.904257	0.95576	0.537539
CD59	14531.4	1.3561	0.267559	5.06843	4.01e-07	5.75e-05	3.23e-05
CD63	8667.4	0.861941	0.215885	3.99259	6.54e-05	0.00231438	0.00130166
CD68	2367.49	1.43434	0.339511	4.22473	2.39e-05	0.00111304	0.000625996
CD70	1253.79	0.364242	0.408673	0.891278	0.37278	0.612116	0.344266
CD74	42698.9	0.89499	0.38433	2.3287	0.0198749	0.111151	0.0625134
CD81	3027.86	0.337993	0.135716	2.49044	0.0127586	0.0860378	0.0483894
CD82	545.788	2.23101	0.533745	4.17991	2.92e-05	0.00127795	0.000718747
CD83	190.225	-0.214736	0.351149	-0.611524	0.540853	0.742562	0.417632
CD9	1964.73	0.916479	0.360932	2.5392	0.0111106	0.0785084	0.0441547
CD93	36.9452	0.399195	0.764169	0.522391	0.601398	0.785155	0.441587
CD96	4841.66	0.66037	0.415257	1.59027	0.111775	0.311157	0.175001
CD99	134.293	-0.448205	0.496378	-0.902951	0.366552	0.608161	0.342042
CD99L2	2027.52	0.84459	0.188264	4.48621	7.25e-06	0.000478769	0.000269269
CDADC1	111.417	0.00760221	0.225355	0.0337343	0.973089	0.987911	0.555621
CDAN1	622.269	-0.167992	0.219897	-0.763957	0.444893	0.672076	0.377989
CDC123	1469.75	-0.538979	0.34777	-1.54982	0.121186	0.325692	0.183176
CDC14A	271.773	-0.140017	0.194412	-0.720205	0.471399	0.693536	0.390059
CDC14B	603.006	-0.447347	0.254944	-1.75468	0.0793133	0.256861	0.144464
CDC16	1363.39	-0.418401	0.17191	-2.43384	0.0149395	0.0942312	0.0529975
CDC20	3194.3	-0.566713	0.816308	-0.694239	0.487532	0.703801	0.395832
CDC23	1259.17	-0.169864	0.151387	-1.12205	0.261843	0.506439	0.284831
CDC25A	945.816	-0.389388	0.716942	-0.543123	0.587045	0.774977	0.435863
CDC25B	3466.89	-0.504259	0.287607	-1.75329	0.0795523	0.257275	0.144697
CDC25C	200.58	-1.01687	0.51836	-1.96171	0.0497965	0.197014	0.110804
CDC26	310.792	-0.128129	0.184544	-0.694298	0.487495	0.703801	0.395832
CDC27	3016.85	-0.185955	0.205268	-0.905911	0.364983	0.606676	0.341207
CDC34	1143.39	-0.0814562	0.175219	-0.464884	0.642015	0.81024	0.455695
CDC37	8730.87	0.253649	0.13445	1.88657	0.0592178	0.217643	0.122407
CDC37L1	622.989	-0.197252	0.219391	-0.899089	0.368605	0.609402	0.34274
CDC40	514.642	-0.394302	0.251735	-1.56634	0.117269	0.319237	0.179545
CDC42	3961.95	0.120365	0.133875	0.899089	0.368605	0.609402	0.34274
CDC42BPA	4321.54	-0.158431	0.139742	-1.13374	0.256904	0.500603	0.281549
CDC42BPB	2734.08	0.0760815	0.133989	0.567819	0.570158	0.762944	0.429095
CDC42BPG	24.3549	-0.112625	0.571303	-0.197137	0.84372	0.927044	0.521388
CDC42EP1	105.332	-1.56726	0.610121	-2.56878	0.0102058	0.0742757	0.0417741
CDC42EP2	925.051	0.288814	0.191603	1.50736	0.131718	0.341306	0.191958
CDC42EP3	3461.49	0.20518	0.317297	0.646649	0.517859	0.725479	0.408024
CDC42EP4	1238.42	-0.318968	0.252087	-1.26531	0.20576	0.439621	0.247252
CDC42SE1	3606.27	0.24726	0.141383	1.74887	0.0803131	0.258801	0.145555
CDC42SE2	660.855	0.0605928	0.155625	0.38935	0.697017	0.842402	0.473784
[truncated: 12,333 more rows]

## Sheet: UMUC3-B1TKO-Parental-DESeq2
Gene_Name	Base_Mean_All_Samples	Log2(Treatment/Control)	Log2FC_Standard_Error	Wald_Statistic	p-value	Benjamini_Hochberg_Correction	q-value
A1BG	261.614	0.191981	0.254625	0.753974	0.450865	0.604331	0.244729
A2M	104.671	1.10898	0.28478	3.89414	9.85e-05	0.0008753	0.00035446
A4GALT	512.864	0.470016	0.136473	3.44401	0.000573147	0.00364481	0.00147599
AAAS	3282.67	-0.413592	0.102063	-4.05232	5.07e-05	0.000511339	0.000207071
AACS	1282.44	0.110629	0.166902	0.662837	0.507435	0.653062	0.264463
AADACP1	178.896	1.72042	0.567688	3.03057	0.00244091	0.0115618	0.00468203
AADAT	656.096	-0.181268	0.154914	-1.17012	0.241953	0.391489	0.158537
AAED1	1245.44	0.592429	0.163391	3.62583	0.000288034	0.00209494	0.000848363
AAGAB	6274.72	-0.284213	0.155296	-1.83014	0.0672293	0.151229	0.0612414
AAK1	4678.81	0.231099	0.117748	1.96266	0.0496858	0.120789	0.0489144
AAMDC	234.514	-0.886535	0.204236	-4.34073	1.42e-05	0.000182451	7.39e-05
AAMP	3508.89	-0.182979	0.0839448	-2.17975	0.0292761	0.0809945	0.0327994
AAR2	1838.62	-0.657951	0.131023	-5.02166	5.12e-07	1.16e-05	4.7e-06
AARS	28079.5	0.170237	0.192198	0.885737	0.375759	0.534218	0.216336
AARS2	1772.53	-0.155322	0.117224	-1.325	0.185172	0.322176	0.130468
AARSD1	1696.63	0.0776797	0.128583	0.604122	0.545763	0.682705	0.276467
AASDH	750.735	0.455333	0.162785	2.79715	0.00515564	0.0210689	0.00853204
AASDHPPT	3261.25	0.351874	0.191898	1.83366	0.0667051	0.150304	0.0608668
AASS	959.5	0.176289	0.421591	0.418152	0.675836	0.784252	0.317589
AATBC	409.016	-0.120999	0.278013	-0.435227	0.663397	0.775566	0.314072
AATF	680.458	0.511201	0.705253	0.724848	0.468546	0.620079	0.251106
AATK	39.937	0.783481	0.458521	1.70872	0.0875038	0.183858	0.0744547
ABALON	181.663	0.0232258	0.237649	0.0977318	0.922145	0.954263	0.386437
ABAT	217.561	0.73673	0.35486	2.07611	0.0378835	0.0984486	0.0398676
ABCA1	66.6201	0.35048	0.541857	0.646812	0.517754	0.660846	0.267615
ABCA11P	307.878	-0.0571339	0.184771	-0.309215	0.757158	0.841638	0.340828
ABCA2	7882	0.5399	0.18156	2.97367	0.00294266	0.0134622	0.00545161
ABCA3	4005.76	0.17659	0.197073	0.896065	0.370218	0.528429	0.213992
ABCA5	60.6331	0.463038	1.20832	0.383208	0.701565	0.802826	0.325111
ABCA7	315.601	-0.102925	0.212203	-0.485029	0.627656	0.749179	0.303386
ABCB10	1348.42	-0.023655	0.168557	-0.140339	0.888392	0.932398	0.377582
ABCB4	79.831	1.06175	0.682376	1.55597	0.119716	0.232515	0.0941588
ABCB6	82.2613	0.338033	0.255747	1.32174	0.186253	0.323254	0.130904
ABCB7	2376.95	0.368833	0.125323	2.94306	0.00324985	0.014554	0.00589377
ABCB8	1954.69	-0.433082	0.150134	-2.88463	0.00391875	0.0168853	0.00683783
ABCB9	289.783	-0.161626	0.251653	-0.642255	0.520708	0.66309	0.268524
ABCC1	874.407	-0.140975	0.197217	-0.714823	0.474719	0.625454	0.253283
ABCC10	1047.48	0.402214	0.150607	2.67062	0.00757119	0.0285286	0.0115529
ABCC2	41.2452	2.30347	0.57894	3.97877	6.93e-05	0.000660947	0.000267656
ABCC3	773.58	0.406117	1.00537	0.40395	0.68625	0.791871	0.320675
ABCC4	11527.1	-0.229068	0.192571	-1.18953	0.234233	0.382524	0.154906
ABCC5	3013.88	0.0271065	0.0932359	0.29073	0.771257	0.851427	0.344792
ABCD1	490.169	0.27237	0.168067	1.6206	0.105103	0.21065	0.0853044
ABCD3	3534.8	0.0624401	0.152308	0.409958	0.681837	0.788466	0.319296
ABCD4	1343.81	0.1096	0.142052	0.771545	0.440384	0.595156	0.241013
ABCE1	11009.4	-0.0433799	0.155289	-0.279349	0.779977	0.858187	0.34753
ABCF1	292.96	-0.579227	0.307591	-1.88311	0.0596857	0.137967	0.055871
ABCF2	7636.18	-0.0671346	0.101555	-0.661063	0.508572	0.653955	0.264824
ABCF3	2453.47	0.0278908	0.0958471	0.290992	0.771057	0.8514	0.344781
ABHD10	2002.57	0.132142	0.116	1.13915	0.254639	0.406159	0.164477
ABHD11	866.9	-0.230771	0.19151	-1.20501	0.2282	0.375584	0.152096
ABHD12	3956.26	-0.563947	0.115087	-4.9002	9.57e-07	1.95e-05	7.9e-06
ABHD12B	67.4618	-0.147935	0.341747	-0.432878	0.665103	0.776469	0.314437
ABHD13	1489.46	0.411742	0.231762	1.77657	0.075639	0.164961	0.0668022
ABHD14A	442.687	-0.333762	0.201918	-1.65296	0.0983395	0.200597	0.0812336
ABHD14B	1951.87	0.00565364	0.182792	0.0309293	0.975326	0.98532	0.399013
ABHD15	458.55	0.192822	0.162235	1.18853	0.234624	0.38289	0.155054
ABHD16A	144.941	-0.0807898	1.22711	-0.0658372	0.947507	0.968389	0.392157
ABHD16B	174.295	-0.798263	0.2362	-3.37961	0.000725891	0.00441709	0.00178874
ABHD17A	2433.78	-0.298115	0.109994	-2.71029	0.00672246	0.0260331	0.0105423
ABHD17B	653.264	0.230732	0.212463	1.08599	0.277485	0.432335	0.175078
ABHD17C	558.222	0.0533607	0.156353	0.341285	0.732889	0.82409	0.333722
ABHD2	4949.05	-0.266722	0.19473	-1.3697	0.17078	0.303361	0.122849
ABHD3	293.073	-1.31793	0.305086	-4.31987	1.56e-05	0.000196219	7.95e-05
ABHD4	1134.58	0.849492	0.15266	5.56459	2.63e-08	9.32e-07	3.78e-07
ABHD5	903.266	0.179208	0.176416	1.01583	0.309712	0.466901	0.189075
ABHD6	492.998	0.192174	0.143451	1.33965	0.180359	0.315907	0.127929
ABHD8	345.506	0.0856682	0.188395	0.454727	0.649306	0.765411	0.30996
ABI1	3056.36	0.521303	0.144995	3.59531	0.000324011	0.00229882	0.000930926
ABI2	4317.53	-0.0684044	0.0924075	-0.740247	0.45915	0.612482	0.24803
ABL1	23397	0.153861	0.180367	0.853044	0.393635	0.550889	0.223087
ABL2	20066.7	0.313951	0.163259	1.92303	0.0544762	0.129197	0.0523193
ABLIM1	320.413	-0.407488	0.660224	-0.617197	0.537104	0.674994	0.273344
ABLIM2	89.7438	3.04662	0.564722	5.3949	6.86e-08	2.09e-06	8.48e-07
ABLIM3	824.419	1.35696	0.183846	7.38095	1.57e-13	2.25e-11	9.11e-12
ABR	485.275	0.512537	0.58581	0.874921	0.381617	0.539263	0.218379
ABRACL	836.907	-0.0198518	0.213246	-0.0930935	0.925829	0.956131	0.387193
ABT1	1662.89	-0.270885	0.149224	-1.81528	0.0694803	0.154865	0.0627137
ABTB1	477.752	0.707512	0.185378	3.81658	0.000135313	0.001132	0.000458413
ABTB2	1190.83	0.265806	0.127249	2.08887	0.0367191	0.096207	0.0389598
ACAA1	1676.74	-0.111311	0.134489	-0.827658	0.407864	0.564487	0.228594
ACAA2	4095.16	-0.265073	0.143269	-1.85018	0.0642874	0.145918	0.0590908
ACACA	822.974	-0.521507	0.264957	-1.96827	0.0490369	0.119561	0.048417
ACACB	674.554	0.378888	0.190286	1.99115	0.0464641	0.114781	0.0464813
ACAD10	1471.9	-0.317185	0.145379	-2.18178	0.0291256	0.0806964	0.0326787
ACAD11	4023.47	0.304954	0.160046	1.90542	0.056726	0.13302	0.0538677
ACAD8	601.556	-0.261796	0.222751	-1.17528	0.239881	0.388941	0.157505
ACAD9	4012.92	-0.0954249	0.119059	-0.80149	0.422848	0.57903	0.234483
ACADM	3971.62	-0.122488	0.121202	-1.01061	0.312202	0.469485	0.190122
ACADS	476.612	-0.0773218	0.164216	-0.470854	0.637745	0.756339	0.306285
ACADSB	2094.88	0.206332	0.197633	1.04402	0.296477	0.453211	0.183531
ACADVL	14574.6	-0.148549	0.0941065	-1.57852	0.114445	0.224571	0.0909418
ACAP1	101.852	0.433036	0.366998	1.17994	0.238024	0.386778	0.156629
ACAP2	4873.73	0.232184	0.135475	1.71385	0.0865562	0.182346	0.0738426
ACAP3	1128.42	-0.24839	0.192003	-1.29368	0.195777	0.335021	0.135669
ACAT1	5828.91	-0.38088	0.136765	-2.78492	0.00535403	0.0217339	0.00880132
ACAT2	1857.6	-0.601009	0.261091	-2.30192	0.0213398	0.0639755	0.0259074
ACBD3	1481.2	0.0766087	0.193841	0.395214	0.692685	0.796297	0.322467
ACBD4	291.769	0.691797	0.250532	2.76131	0.00575699	0.0230661	0.0093408
ACBD5	2738.6	0.495527	0.133027	3.72502	0.0001953	0.00152371	0.000617039
ACBD6	2338.52	0.304409	0.149548	2.03552	0.0417984	0.106261	0.0430314
ACBD7	301.36	0.306713	0.281106	1.0911	0.275231	0.429867	0.174078
ACCS	359.183	0.375839	0.196654	1.91117	0.0559829	0.131556	0.0532746
ACD	1327.29	-0.430197	0.178562	-2.40922	0.0159865	0.0510647	0.0206791
ACER2	74.7823	-0.212202	0.393246	-0.539616	0.589462	0.719399	0.291327
ACER3	2814.84	0.112184	0.156482	0.716916	0.473426	0.62451	0.2529
ACHE	258.524	1.48398	0.245509	6.04449	1.5e-09	7.88e-08	3.19e-08
ACIN1	13620.3	-0.319234	0.109449	-2.91675	0.003537	0.0155218	0.00628567
ACLY	14390.9	-0.224104	0.143343	-1.56341	0.117955	0.230019	0.0931482
ACO1	4513.74	-0.00572103	0.164921	-0.0346896	0.972327	0.983875	0.398428
ACO2	8370.25	-0.188108	0.12179	-1.54453	0.12246	0.236603	0.0958143
ACOT1	153.14	-0.447173	0.222055	-2.01379	0.0440314	0.110265	0.0446526
ACOT13	2647.86	-0.163598	0.116948	-1.3989	0.161843	0.291651	0.118106
ACOT2	3062.34	-0.0980873	0.150604	-0.651292	0.514858	0.65891	0.266831
ACOT7	4314.11	-0.403937	0.152103	-2.65568	0.00791491	0.0295174	0.0119533
ACOT8	981.698	-0.496725	0.17351	-2.8628	0.00419917	0.0178053	0.00721041
ACOT9	2685.11	-0.258796	0.117717	-2.19846	0.0279161	0.0781416	0.0316441
ACOX1	1449.96	0.274217	0.122403	2.24028	0.0250728	0.0722023	0.0292389
ACOX2	685.077	0.63217	0.294138	2.14923	0.0316159	0.0858616	0.0347704
ACOX3	512.268	0.068495	0.155729	0.439834	0.660057	0.773427	0.313206
ACP1	2817.35	-0.131706	0.0954468	-1.37989	0.16762	0.299589	0.121321
ACP2	844.896	-0.349829	0.171187	-2.04355	0.0409977	0.104757	0.0424222
ACP6	415.936	0.318544	0.154584	2.06065	0.039336	0.101446	0.0410813
ACPT	41.1183	-0.197179	0.507745	-0.388342	0.697763	0.800071	0.323995
ACRC	193.426	0.186799	0.305613	0.611229	0.541048	0.678475	0.274754
ACRV1	37.5131	-0.541722	0.484489	-1.11813	0.263511	0.416597	0.168704
ACSF2	482.976	1.01596	0.239725	4.23802	2.25e-05	0.000267264	0.000108231
ACSF3	824.208	-0.692642	0.202823	-3.41502	0.000637784	0.0039742	0.00160939
ACSL1	2556.48	0.279754	0.120324	2.32501	0.0200716	0.060985	0.0246964
ACSL3	4301.6	-0.144615	0.146378	-0.987959	0.323173	0.481359	0.19493
ACSM3	270.654	2.60709	0.642603	4.05708	4.97e-05	0.000503904	0.00020406
ACSM4	44.3141	0.653102	0.458337	1.42494	0.154175	0.281376	0.113945
ACSS1	1789.96	-0.126171	0.208559	-0.604965	0.545202	0.682144	0.27624
ACSS2	2467.22	-0.659731	0.226613	-2.91126	0.00359969	0.015745	0.00637605
ACSS3	151.323	1.70139	1.1376	1.4956	0.134759	0.254109	0.102904
ACTA2	298.255	1.47322	0.414387	3.55518	0.000377717	0.00259412	0.00105051
ACTB	83161.5	-0.707915	0.140963	-5.02199	5.11e-07	1.16e-05	4.7e-06
ACTG1	159795	-0.098296	0.173168	-0.567632	0.570285	0.70367	0.284957
ACTG1P20	87.0774	0.250855	0.33064	0.758694	0.448035	0.601994	0.243782
ACTL6A	4517.21	-0.0934214	0.0725666	-1.28739	0.197959	0.337583	0.136707
ACTN1	23641.4	-0.209747	0.147582	-1.42123	0.155251	0.283068	0.114631
ACTN2	112.163	2.35136	0.561961	4.18421	2.86e-05	0.00032415	0.000131267
ACTN4	30814.5	-0.523892	0.121101	-4.32606	1.52e-05	0.000192	7.78e-05
ACTR10	2942.73	0.393547	0.0918606	4.28418	1.83e-05	0.000224177	9.08e-05
ACTR1A	6069.72	-0.439309	0.178897	-2.45565	0.0140631	0.0461603	0.018693
ACTR1B	2668.86	-0.209375	0.157759	-1.32718	0.184448	0.32121	0.130076
ACTR2	11387	-0.162502	0.166583	-0.975501	0.329312	0.487291	0.197332
ACTR3	10438	0.153662	0.134236	1.14471	0.252327	0.403809	0.163526
ACTR3B	717.32	0.0814304	0.148831	0.547134	0.584287	0.715113	0.289591
ACTR5	894.864	-0.150569	0.141312	-1.06551	0.286645	0.44193	0.178963
ACTR6	771.454	0.0653269	0.18511	0.352909	0.724157	0.818281	0.331369
ACTR8	1335.71	0.0461486	0.127314	0.362477	0.716996	0.813434	0.329407
ACVR1	2329.97	0.745655	0.137849	5.40921	6.33e-08	1.96e-06	7.93e-07
ACVR1B	2761.36	0.39982	0.117049	3.41584	0.000635852	0.00396705	0.00160649
ACVR2A	234.833	0.147574	0.209105	0.705739	0.480351	0.629774	0.255032
ACVR2B-AS1	87.179	0.707244	0.313328	2.2572	0.0239957	0.069841	0.0282827
ACVR2B	1674.71	0.494094	0.175595	2.81383	0.00489552	0.0201982	0.00817943
ACY1	1922.48	-0.306376	0.165376	-1.8526	0.0639393	0.145376	0.0588712
ACYP1	396.995	-0.566163	0.184218	-3.07332	0.00211688	0.0103246	0.00418101
ACYP2	101.966	-0.210603	0.309572	-0.680304	0.496312	0.643037	0.260403
ADA	1978.52	0.248778	0.271307	0.91696	0.359164	0.517662	0.209632
ADAL	303.106	-1.07803	0.201568	-5.34821	8.88e-08	2.62e-06	1.06e-06
ADAM10	8216.25	-0.0502836	0.172969	-0.290709	0.771274	0.851427	0.344792
ADAM11	1164.12	0.668693	0.189864	3.52196	0.000428371	0.00287525	0.00116436
ADAM12	3899.78	-1.00522	0.338256	-2.97178	0.00296076	0.0135236	0.00547648
ADAM15	5707.77	-0.195677	0.101141	-1.9347	0.0530269	0.126531	0.0512396
ADAM17	5196.03	0.575058	0.0914851	6.28581	3.26e-10	2.1e-08	8.49e-09
ADAM19	4430.5	0.231713	0.34106	0.679391	0.49689	0.643535	0.260605
ADAM1A	84.9477	-0.340751	0.265928	-1.28136	0.200066	0.340479	0.13788
ADAM22	1723.9	-0.194529	0.122529	-1.58761	0.112374	0.221519	0.0897059
ADAM23	900.362	-0.0608565	0.125389	-0.48534	0.627435	0.748983	0.303307
ADAM8	158.526	-0.311877	0.258685	-1.20563	0.227962	0.375284	0.151974
ADAM9	14078.5	-0.278985	0.148363	-1.88042	0.0600507	0.138667	0.0561542
ADAMTS1	2443.67	-0.714505	0.555402	-1.28646	0.198282	0.338046	0.136895
ADAMTS13	169.001	0.780991	0.360661	2.16544	0.0303539	0.0832572	0.0337157
ADAMTS14	273.668	-0.406376	0.391067	-1.03915	0.298736	0.455879	0.184612
ADAMTS16	704.444	0.0736445	0.153875	0.478599	0.632224	0.752203	0.304611
ADAMTS19-AS1	56.8007	-0.954212	0.724574	-1.31693	0.187863	0.325326	0.131743
ADAMTS19	657.24	-0.316297	0.808247	-0.391337	0.695548	0.798219	0.323245
ADAMTS2	143.864	0.531653	0.41261	1.28851	0.197568	0.336959	0.136454
ADAMTS3	88.2182	-0.171558	0.420975	-0.407526	0.683622	0.789867	0.319863
ADAMTS6	213.455	0.511826	0.643255	0.795681	0.426217	0.582233	0.23578
ADAMTSL1	30.6016	-0.672484	0.454111	-1.48088	0.138639	0.260045	0.105307
ADAMTSL4	529.523	1.47915	0.275317	5.37254	7.76e-08	2.33e-06	9.42e-07
ADAMTSL5	519.78	-0.167422	0.159234	-1.05142	0.293065	0.449648	0.182088
ADAP1	56.1804	0.82596	0.519496	1.58992	0.111852	0.220948	0.0894746
ADAR	15681.7	0.0642325	0.107396	0.598093	0.549778	0.685933	0.277774
ADARB1	2412.32	0.143367	0.145244	0.987074	0.323606	0.481898	0.195148
ADAT1	819.998	-0.637238	0.184648	-3.45109	0.000558319	0.00356756	0.00144471
ADAT2	1441.93	0.046818	0.197192	0.237423	0.812328	0.879941	0.356339
ADAT3	193.881	-0.461222	0.175418	-2.62928	0.00855665	0.0312538	0.0126565
ADCK1	532.638	0.290035	0.132815	2.18375	0.0289807	0.0803946	0.0325565
ADCK2	3300.16	-0.110155	0.115782	-0.951401	0.341401	0.499534	0.202291
ADCK3	1601.53	0.517906	0.148074	3.49761	0.000469447	0.00310862	0.00125886
ADCK4	989.101	-0.0455664	0.159368	-0.285918	0.774941	0.8542	0.345915
ADCK5	828.958	0.0637739	0.124164	0.513627	0.607513	0.733091	0.296871
ADCY10P1	43.0929	-2.0067	0.833031	-2.40891	0.0160003	0.0510708	0.0206815
ADCY3	4894.2	-0.129532	0.14003	-0.925032	0.354949	0.513791	0.208064
ADCY5	396.425	0.677218	0.310417	2.18164	0.029136	0.0807075	0.0326832
ADCY6	2295.44	-0.799419	0.144335	-5.53864	3.05e-08	1.06e-06	4.29e-07
ADCY7	1964.12	0.0909961	0.170595	0.533405	0.593753	0.722315	0.292508
ADCY9	1207.65	-0.147715	0.136153	-1.08492	0.277959	0.432858	0.175289
ADCYAP1R1	242.016	0.206696	0.364638	0.566854	0.570814	0.70397	0.285079
ADD1	5572.18	0.0482702	0.0650345	0.742224	0.457952	0.611357	0.247574
ADD2	5668.02	-0.171956	0.0831252	-2.06864	0.0385795	0.0999209	0.0404638
ADD3	1319.36	-0.58625	0.29083	-2.01578	0.0438226	0.109825	0.0444744
ADGRA2	616.306	-0.296613	0.201977	-1.46855	0.141955	0.264736	0.107207
ADGRA3	2784.02	-0.143553	0.10029	-1.43139	0.152319	0.278944	0.112961
ADGRB1	9336.84	-0.172482	0.228704	-0.754169	0.450748	0.604319	0.244724
ADGRB2	2753.56	-0.313755	0.135786	-2.31065	0.020852	0.062802	0.0254322
ADGRB3	115.676	1.39007	1.06104	1.3101	0.190163	0.328242	0.132924
ADGRE1	443.072	-0.0827951	0.308758	-0.268156	0.78858	0.864152	0.349946
ADGRE5	4251.56	-0.327097	0.161872	-2.02072	0.0433093	0.10899	0.0441362
ADGRG1	1648.41	0.857322	0.22103	3.87876	0.000104991	0.000919364	0.000372304
ADGRL1	6431.18	-0.136594	0.114837	-1.18947	0.234257	0.382524	0.154906
ADGRL2	5309.45	-0.2961	0.261865	-1.13074	0.258166	0.410193	0.166111
ADGRL3	1355.93	0.826693	0.684248	1.20818	0.226979	0.374112	0.1515
ADGRV1	3054.17	-0.643936	0.391347	-1.64544	0.09988	0.202715	0.082091
ADH5	3517.99	-0.126445	0.111562	-1.1334	0.257044	0.408899	0.165587
ADI1	939.028	-0.574736	0.181338	-3.16942	0.00152745	0.00798523	0.00323368
ADIPOR1	2760.72	-0.208091	0.117144	-1.77636	0.0756729	0.165008	0.0668212
ADIPOR2	7713.95	-0.281959	0.108532	-2.59792	0.00937895	0.0335124	0.0135711
ADIRF	146.454	-0.0296873	0.253692	-0.117021	0.906843	0.944461	0.382467
ADK	3849.3	-0.0741617	0.151617	-0.48914	0.624743	0.747042	0.302521
ADM	2109.24	-0.925977	0.630113	-1.46954	0.141686	0.264345	0.107049
ADM5	206.189	-0.482303	0.293581	-1.64283	0.100419	0.203522	0.082418
ADNP-AS1	100.989	0.274715	0.219674	1.25056	0.211096	0.354222	0.143445
ADNP	7633.01	-0.000909426	0.0963611	-0.00943769	0.99247	0.995343	0.403072
ADNP2	3542.28	0.135679	0.12597	1.07707	0.281447	0.436401	0.176724
ADO	2561.73	0.422065	0.1354	3.11718	0.00182588	0.0091629	0.00371059
ADORA2A	56.7469	1.80775	1.69552	1.06619	0.286339	0.441568	0.178816
ADORA2B	2188.06	0.298788	0.155549	1.92086	0.0547496	0.12957	0.0524703
ADPGK	1420.65	-0.154232	0.0952798	-1.61873	0.105506	0.211237	0.0855423
ADPRHL1	161.436	-0.112015	0.357161	-0.313627	0.753804	0.838791	0.339675
ADPRHL2	1118.09	-0.505887	0.126525	-3.99831	6.38e-05	0.000617111	0.000249904
ADPRM	314.64	0.0103921	0.280227	0.0370846	0.970418	0.982898	0.398032
ADRA1B	96.2286	1.17722	0.583549	2.01735	0.0436589	0.109579	0.0443751
ADRA2C	475.358	-0.158159	0.280712	-0.56342	0.573149	0.705968	0.285887
ADRB2	638.897	0.0873916	0.554737	0.157537	0.874822	0.923604	0.374021
ADRBK1	6465.76	-0.0502095	0.121925	-0.411807	0.680481	0.78771	0.31899
ADRBK2	2357.75	0.0472519	0.106693	0.442878	0.657854	0.772268	0.312736
ADRM1	7526.95	-0.0812205	0.166499	-0.487815	0.625681	0.747716	0.302794
ADSL	4832.48	-1.32952	0.162664	-8.17341	3e-16	9.5e-14	3.85e-14
ADSS	2825.49	0.330284	0.130207	2.5366	0.0111934	0.0386069	0.0156342
ADSSL1	176.517	1.75219	0.305189	5.74133	9.39e-09	3.84e-07	1.55e-07
ADTRP	301.175	0.332331	0.451098	0.736717	0.461295	0.613922	0.248613
AEBP1	35.4317	0.754031	0.641978	1.17454	0.240178	0.389212	0.157615
AEBP2	3293.18	0.280925	0.168132	1.67087	0.0947481	0.195367	0.0791157
AEN	2335.45	0.0721202	0.169566	0.425322	0.670602	0.780697	0.31615
AES	10536.1	-0.319136	0.115734	-2.75749	0.00582466	0.0232254	0.0094053
AFAP1	7864.4	0.571037	0.255745	2.23284	0.0255598	0.0732402	0.0296592
AFAP1L1	1453.29	-0.460765	0.210622	-2.18764	0.0286961	0.0797879	0.0323108
AFAP1L2	3429.51	-0.693338	0.213268	-3.25101	0.00114994	0.00635423	0.0025732
AFF1	2341.7	0.256052	0.105857	2.41886	0.0155692	0.0499941	0.0202455
AFF3	58.3682	0.679644	0.570313	1.1917	0.233378	0.381396	0.15445
AFF4	11547.3	0.570628	0.0944566	6.04116	1.53e-09	7.99e-08	3.23e-08
AFG3L1P	630.432	-0.578925	0.223529	-2.58993	0.00959941	0.0341535	0.0138307
AFG3L2	4569.86	-0.130735	0.166343	-0.785934	0.431906	0.587498	0.237912
AFMID	1227.36	0.137772	0.131111	1.0508	0.29335	0.449981	0.182224
AFP	59.5468	-0.066134	0.397136	-0.166527	0.867742	0.919265	0.372264
AFTPH	2381.67	0.735983	0.177185	4.15376	3.27e-05	0.000356514	0.000144373
AGA	324.191	0.216746	0.17586	1.23249	0.217765	0.362352	0.146737
AGAP1	3961.09	0.273601	0.120977	2.2616	0.0237221	0.0692321	0.0280361
AGAP11	99.5008	0.535979	0.323836	1.6551	0.0979051	0.200008	0.0809948
AGAP2	130.559	0.512748	0.293226	1.74864	0.0803524	0.172387	0.0698096
AGAP3	4739.54	0.0821169	0.116165	0.706902	0.479627	0.629322	0.254849
AGAP4	286.296	0.0278436	0.192454	0.144677	0.884966	0.930535	0.376828
AGAP5	211.445	-0.05053	0.25022	-0.201942	0.839962	0.900225	0.364553
AGAP6	675.191	-0.0305202	0.178179	-0.17129	0.863996	0.916756	0.371248
AGAP9	256.461	-1.19651	0.261663	-4.57272	4.81e-06	7.44e-05	3.01e-05
AGBL2	55.0789	-0.300661	0.463181	-0.649122	0.51626	0.659572	0.267099
AGBL3	50.4915	-0.47388	0.320236	-1.47978	0.138931	0.260391	0.105447
AGBL5	4104.51	-0.114886	0.114251	-1.00556	0.314627	0.471851	0.19108
AGFG1	3180.89	0.286186	0.100108	2.85877	0.00425281	0.0180149	0.0072953
AGFG2	552.652	0.286323	0.163365	1.75266	0.0796603	0.171237	0.069344
AGGF1	890.96	-0.077653	0.16252	-0.477807	0.632788	0.752538	0.304746
AGK	821.615	-0.20824	0.186799	-1.11478	0.264943	0.418315	0.1694
AGL	2081.11	-0.0121621	0.122281	-0.0994604	0.920773	0.952993	0.385922
AGO1	3351.84	-0.213561	0.112577	-1.89703	0.0578239	0.135015	0.0546754
AGO2	6358.11	-0.00487486	0.121062	-0.0402675	0.96788	0.981373	0.397415
AGO3	1107.09	0.131356	0.178509	0.735849	0.461823	0.61426	0.24875
AGO4	1927.48	0.327153	0.131678	2.48448	0.0129739	0.0434094	0.017579
AGPAT1	379.517	-0.379401	0.345	-1.09971	0.271457	0.42537	0.172257
AGPAT2	2571.01	-0.315241	0.162457	-1.94046	0.0523242	0.125303	0.0507425
AGPAT3	4806.72	-0.634122	0.128217	-4.9457	7.59e-07	1.62e-05	6.54e-06
AGPAT4	737.262	0.118359	0.185914	0.636631	0.524365	0.665963	0.269687
AGPAT5	4674.22	-0.00557415	0.215604	-0.0258537	0.979374	0.98791	0.400062
AGPS	5129.95	-0.00676591	0.157883	-0.0428539	0.965818	0.980178	0.396931
AGRN	9649.28	-0.563883	0.124268	-4.53764	5.69e-06	8.45e-05	3.42e-05
AGT	72.5242	0.627204	0.372246	1.68492	0.0920041	0.191041	0.0773635
AGTPBP1	2928.31	0.441383	0.165273	2.67063	0.00757094	0.0285286	0.0115529
AGTRAP	1451.7	0.224091	0.187588	1.19459	0.232247	0.380268	0.153993
AHCTF1	10003.3	0.274246	0.123006	2.22953	0.0257788	0.0737258	0.0298559
AHCTF1P1	913.58	0.259579	0.134049	1.93645	0.0528121	0.126199	0.0511053
AHCY	19504.9	-0.156588	0.158061	-0.99068	0.321842	0.479753	0.19428
AHCYL1	11405.5	-0.242068	0.122744	-1.97214	0.048594	0.118655	0.0480502
AHCYL2	1955.18	0.644735	0.109483	5.88892	3.89e-09	1.78e-07	7.23e-08
AHDC1	1157.6	-0.311992	0.19622	-1.59001	0.111832	0.220942	0.0894723
AHI1	3611.44	0.332163	0.138641	2.39585	0.0165817	0.0524774	0.0212512
AHNAK	116945	-0.31793	0.119394	-2.66287	0.00774763	0.0290318	0.0117567
AHNAK2	63865.6	0.318862	0.151365	2.10658	0.0351544	0.0931526	0.0377229
AHR	325.727	1.27998	0.320784	3.99017	6.6e-05	0.000636347	0.000257694
AHRR	242.089	1.14562	0.394846	2.90144	0.0037145	0.0161569	0.00654286
AHSA1	4559.17	-0.844748	0.143024	-5.90634	3.5e-09	1.65e-07	6.66e-08
AHSA2	1770.17	-0.107977	0.205871	-0.524491	0.599937	0.726849	0.294343
AIDA	2117.7	0.497884	0.285346	1.74484	0.081012	0.173467	0.0702468
AIF1L	83.24	0.269926	0.29487	0.915405	0.359979	0.518317	0.209897
AIFM1	3334.5	-0.0575899	0.122371	-0.470617	0.637914	0.756472	0.306339
AIFM2	1482.53	-0.0978993	0.128213	-0.763565	0.445127	0.599295	0.24269
AIG1	1906.07	0.407856	0.158901	2.56673	0.0102661	0.0359902	0.0145745
AIM1	1889.41	-0.0927467	0.176461	-0.525594	0.599171	0.726119	0.294048
AIMP1	1866.67	0.108771	0.134457	0.808966	0.418535	0.575129	0.232903
AIMP2	887.355	-0.138637	0.144902	-0.956765	0.338686	0.496958	0.201247
AIP	5434.15	0.420843	0.191482	2.19782	0.0279619	0.0781875	0.0316627
AJUBA	4058.13	-0.222588	0.15671	-1.42038	0.155498	0.283375	0.114755
AK1	499.716	0.0274062	0.254566	0.107659	0.914266	0.948989	0.384301
AK2	8708.39	-0.566042	0.146585	-3.86153	0.000112678	0.000975759	0.000395142
AK3	3692.45	0.0806723	0.155647	0.518302	0.604248	0.730078	0.295651
AK4	7108.01	-0.13709	0.216147	-0.634241	0.525924	0.667179	0.27018
AK6	94.3655	-0.664334	0.702779	-0.945295	0.344508	0.503172	0.203764
AK7	53.2523	0.747027	0.553607	1.34938	0.177215	0.311877	0.126297
AK8	51.2046	0.894617	0.502277	1.78112	0.0748923	0.163762	0.0663166
AK9	128.46	0.52783	0.31003	1.70251	0.08866	0.185603	0.0751615
AKAP1	4062.84	0.18857	0.0977028	1.93004	0.0536023	0.127561	0.0516568
AKAP10	2096.73	0.346409	0.0851389	4.06876	4.73e-05	0.000483549	0.000195817
AKAP11	8828.05	0.665982	0.175306	3.79897	0.000145299	0.00119969	0.000485823
AKAP12	6317.51	0.0705724	0.212069	0.332781	0.739299	0.828571	0.335536
AKAP13	8731.5	0.042849	0.157018	0.272892	0.784936	0.861796	0.348991
AKAP17A	98.5409	1.54198	0.528818	2.9159	0.00354665	0.0155474	0.00629603
AKAP2	8819.47	0.6254	0.270147	2.31504	0.0206109	0.0622347	0.0252025
AKAP3	56.7728	1.75596	0.403593	4.35083	1.36e-05	0.000175771	7.12e-05
AKAP5	65.0363	-0.108747	0.398505	-0.272887	0.78494	0.861796	0.348991
AKAP6	323.422	1.66946	0.306677	5.44369	5.22e-08	1.65e-06	6.7e-07
AKAP7	478.891	0.0793019	0.155703	0.509317	0.61053	0.735266	0.297752
AKAP8	2015.07	-0.015423	0.082834	-0.186191	0.852295	0.9089	0.368066
AKAP8L	2898.46	0.191479	0.132472	1.44543	0.148336	0.273722	0.110846
AKAP9	5919.44	0.41623	0.114377	3.63911	0.000273587	0.00201407	0.000815615
AKIP1	1052.63	0.0717682	0.111208	0.645351	0.5187	0.661514	0.267885
AKIRIN1	4349.77	0.241325	0.0925116	2.60859	0.0090917	0.0327056	0.0132444
AKIRIN2	2723.95	0.369711	0.102593	3.60366	0.000313762	0.00223923	0.000906795
AKNA	1094.35	1.08614	0.259069	4.19248	2.76e-05	0.000315507	0.000127767
AKNAD1	272.267	0.310951	0.19273	1.6134	0.106657	0.212993	0.0862534
AKR1A1	4616.06	0.172508	0.124387	1.38687	0.165481	0.296698	0.12015
AKR1B1	5585.86	-0.369247	0.16041	-2.30189	0.0213412	0.0639755	0.0259074
AKR7A2	2525.67	-0.407902	0.134895	-3.02386	0.00249571	0.0117823	0.00477132
AKT1	9092.07	-0.428328	0.107635	-3.97945	6.91e-05	0.000659539	0.000267086
AKT1S1	4583.95	-0.0223211	0.132428	-0.168552	0.866149	0.918454	0.371936
AKT2	7914.99	-0.305681	0.0906249	-3.37304	0.000743434	0.00450597	0.00182473
AKT3	345.518	0.175205	0.614455	0.285138	0.775538	0.854717	0.346124
AKTIP	965.034	0.0807189	0.148776	0.542552	0.587438	0.71798	0.290752
ALAD	1115.43	-0.358758	0.169681	-2.11431	0.0344889	0.0917543	0.0371567
ALAS1	3736.86	-0.102893	0.139873	-0.735616	0.461964	0.61426	0.24875
ALCAM	13108.8	-0.638099	0.19072	-3.34573	0.000820656	0.00487929	0.00197591
ALDH16A1	1753.89	-0.396424	0.121474	-3.26344	0.00110067	0.00613994	0.00248642
ALDH18A1	7300.5	-0.0444303	0.124158	-0.357852	0.720454	0.815689	0.33032
ALDH1A1	3312.07	-0.859943	1.46362	-0.587547	0.556836	0.692303	0.280354
ALDH1A3	171.251	0.660904	0.467058	1.41504	0.157058	0.285423	0.115585
ALDH1B1	5216.16	-0.0483545	0.126713	-0.381606	0.702753	0.803408	0.325347
ALDH1L2	73.5049	1.26846	0.415177	3.05523	0.00224887	0.0108372	0.00438863
ALDH2	87.2843	1.03171	0.386439	2.66978	0.00759003	0.0285699	0.0115696
ALDH3A2	3425.45	-0.0653848	0.146614	-0.445964	0.655623	0.77083	0.312154
ALDH3B1	2062.66	0.501602	0.258128	1.94323	0.0519884	0.124768	0.050526
ALDH4A1	1920.63	0.11902	0.181274	0.656579	0.511452	0.656264	0.265759
ALDH5A1	1813.19	-0.250413	0.0893123	-2.80379	0.00505056	0.0206967	0.00838131
ALDH6A1	2347.21	1.35542	0.14834	9.13727	6.41e-20	3.55e-17	1.44e-17
ALDH7A1	5550.75	-0.655995	0.13876	-4.72755	2.27e-06	3.97e-05	1.61e-05
ALDH9A1	2979.44	-0.184342	0.153442	-1.20138	0.229604	0.377241	0.152767
ALDOA	29919.4	-0.232287	0.140717	-1.65074	0.0987908	0.201205	0.0814795
ALDOC	243.87	0.527561	0.317464	1.6618	0.0965535	0.198119	0.0802299
ALG1	774.765	-0.374475	0.192699	-1.94331	0.0519785	0.124767	0.0505255
ALG10	419.196	-0.754502	0.273555	-2.75814	0.00581317	0.0231865	0.00938955
ALG10B	973.464	-0.225163	0.241881	-0.930881	0.351915	0.510572	0.20676
ALG11	957.349	0.22818	0.18485	1.2344	0.217053	0.361438	0.146367
ALG12	937.547	0.0830936	0.196078	0.423778	0.671728	0.781803	0.316597
ALG13	1420.71	-0.183886	0.119527	-1.53844	0.12394	0.238664	0.096649
ALG14	330.288	-0.33848	0.194827	-1.73734	0.082328	0.175438	0.0710451
ALG2	1338.27	0.262524	0.180778	1.45219	0.146449	0.271028	0.109755
ALG3	2722.54	-0.191437	0.0998778	-1.91671	0.0552744	0.130305	0.0527681
ALG5	1626.94	-0.185727	0.22394	-0.82936	0.406901	0.56374	0.228291
ALG6	769.776	-0.13725	0.251991	-0.544661	0.585986	0.716864	0.2903
ALG8	2346.48	-0.471097	0.157951	-2.98256	0.00285849	0.013124	0.00531468
ALG9	1615.52	-0.0899133	0.142419	-0.63133	0.527825	0.668954	0.270898
ALKBH1	569.493	-0.0761711	0.165537	-0.460144	0.645413	0.762308	0.308703
ALKBH2	1459.06	-0.431464	0.183974	-2.34524	0.0190147	0.058382	0.0236423
ALKBH3	808.055	-0.0459	0.146437	-0.313445	0.753943	0.838834	0.339693
ALKBH4	693.773	-0.121293	0.116575	-1.04048	0.298119	0.455302	0.184378
ALKBH5	5126.95	-0.301806	0.114422	-2.63766	0.00834814	0.0306569	0.0124148
ALKBH6	330.7	0.27815	0.190027	1.46374	0.143266	0.266545	0.10794
ALKBH7	2183.34	0.411216	0.239242	1.71883	0.0856452	0.181029	0.073309
ALKBH8	1316.7	0.367699	0.194728	1.88827	0.0589902	0.136835	0.0554125
ALMS1-IT1	37.9073	0.550955	0.423142	1.30206	0.192897	0.331457	0.134226
ALMS1	2393.03	-0.272203	0.127238	-2.13933	0.0324092	0.0874983	0.0354331
ALOX12-AS1	104.066	0.172189	0.274406	0.627497	0.530333	0.670536	0.271539
ALOX12	166.404	0.337469	0.196391	1.71836	0.0857318	0.181183	0.0733716
ALOXE3	187.011	1.00726	0.306058	3.29108	0.000998051	0.00569398	0.00230583
ALPK1	1365.68	1.2638	0.215903	5.85353	4.81e-09	2.11e-07	8.56e-08
ALPK3	45.8513	0.131379	0.432885	0.303496	0.761512	0.844573	0.342017
ALPL	99.5311	0.231423	0.621432	0.372403	0.709593	0.80862	0.327457
ALS2	2152.88	0.204153	0.0857572	2.3806	0.0172846	0.0542206	0.0219571
ALX3	176.254	-0.0180218	0.216959	-0.0830656	0.933799	0.960352	0.388902
ALYREF	3497.57	-0.735011	0.161793	-4.5429	5.55e-06	8.3e-05	3.36e-05
AMACR	733.842	0.752078	0.222537	3.37957	0.000725998	0.00441709	0.00178874
AMBRA1	4046.78	0.316589	0.162464	1.94867	0.0513343	0.123824	0.0501434
AMD1	4937.14	-0.373977	0.164832	-2.26884	0.0232778	0.0683192	0.0276664
AMDHD2	687.292	0.450802	0.147963	3.04671	0.00231359	0.011073	0.00448408
AMER1	1440.12	0.0428836	0.141451	0.303169	0.761761	0.844709	0.342072
AMER2	87.6665	0.904076	0.414376	2.18178	0.0291259	0.0806964	0.0326787
AMFR	8919.86	0.175586	0.105238	1.66847	0.0952233	0.196013	0.0793772
AMH	464.057	-0.372096	0.173939	-2.13923	0.0324167	0.0875007	0.0354341
AMIGO1	446.578	1.07866	0.267608	4.03074	5.56e-05	0.000552694	0.000223818
AMIGO2	8393.71	-0.523436	0.36914	-1.41799	0.156195	0.284242	0.115106
AMIGO3	369.5	0.0709554	0.17648	0.40206	0.68764	0.793151	0.321193
AMMECR1L	2189.96	0.317507	0.130758	2.42821	0.0151737	0.0489755	0.019833
AMN1	720.282	0.189229	0.243719	0.776423	0.437499	0.592502	0.239939
AMOT	40.1251	0.120454	0.424317	0.283876	0.776505	0.85543	0.346413
AMOTL1	5153.1	-0.340173	0.171221	-1.98675	0.0469503	0.115724	0.0468633
AMOTL2	14216.3	-0.243325	0.258804	-0.94019	0.34712	0.50571	0.204792
AMPD2	5230.18	-0.0613233	0.10664	-0.575052	0.565256	0.699568	0.283296
AMPD3	133.397	2.28218	0.628578	3.6307	0.000282652	0.00206709	0.000837085
AMT	147.805	0.0289795	0.241428	0.120034	0.904456	0.942777	0.381785
AMY2B	78.1358	0.773168	0.402682	1.92005	0.0548518	0.129722	0.0525321
AMZ2	4042.56	0.475582	0.103905	4.5771	4.71e-06	7.32e-05	2.96e-05
AMZ2P1	481.437	0.580245	0.197244	2.94177	0.00326346	0.0145858	0.00590665
ANAPC1	5335.79	-0.00780857	0.16222	-0.0481356	0.961608	0.97777	0.395956
ANAPC10	606.457	-0.0972321	0.134857	-0.721003	0.470908	0.622	0.251884
ANAPC11	2126.07	-0.50838	0.171308	-2.96764	0.00300096	0.0136557	0.00552997
ANAPC13	3114.44	0.304066	0.134574	2.25946	0.0238546	0.0695215	0.0281533
ANAPC15	2788.43	0.606023	0.152759	3.96718	7.27e-05	0.00068797	0.000278599
ANAPC16	4596.96	0.0295136	0.114788	0.257113	0.797091	0.869614	0.352157
ANAPC2	1476	-0.195878	0.13939	-1.40525	0.159946	0.288911	0.116997
ANAPC4	933.095	-0.0872194	0.14137	-0.616958	0.537263	0.675129	0.273399
ANAPC5	5272.37	-0.488531	0.100843	-4.84445	1.27e-06	2.46e-05	9.98e-06
ANAPC7	2697.02	-0.422902	0.140713	-3.00543	0.0026521	0.0123468	0.00499993
ANG	168.364	0.269141	0.238797	1.12707	0.259713	0.412061	0.166868
ANGEL1	2575.63	0.30332	0.109802	2.76243	0.00573732	0.0230011	0.00931449
ANGEL2	1352.03	0.319858	0.160009	1.999	0.0456083	0.113158	0.0458244
ANGPT1	1172.82	0.809884	0.228015	3.55189	0.000382477	0.00262141	0.00106156
ANGPT4	181.234	-0.116626	0.31589	-0.369198	0.71198	0.810023	0.328025
ANGPTL2	39.2821	1.34449	0.516021	2.60549	0.00917427	0.0329314	0.0133358
ANGPTL4	698.113	0.201308	0.615828	0.326889	0.743752	0.831807	0.336847
ANGPTL6	41.2726	1.48115	0.561341	2.63859	0.00832511	0.0306351	0.0124059
ANK1	47.5587	-0.643345	0.580222	-1.10879	0.26752	0.421085	0.170522
ANK2	5245.83	0.146294	0.176345	0.829592	0.40677	0.563676	0.228265
ANK3	504.424	-1.83841	0.578403	-3.17842	0.00148082	0.00777808	0.0031498
ANKAR	225.362	0.309461	0.217004	1.42606	0.153851	0.280996	0.113792
ANKDD1A	243.233	0.463496	0.28004	1.65511	0.0979025	0.200008	0.0809948
ANKEF1	760.031	-0.22304	0.189902	-1.1745	0.240195	0.389212	0.157615
ANKFY1	6010.25	-0.291727	0.108909	-2.67863	0.0073925	0.0280499	0.0113591
ANKH	3371.63	0.0210348	0.162373	0.129547	0.896925	0.937355	0.37959
ANKHD1-EIF4EBP3	7075.9	-0.353709	0.344455	-1.02687	0.304484	0.461896	0.187049
ANKHD1	9548.77	0.641591	0.213805	3.00082	0.00269255	0.0125045	0.0050638
ANKIB1	4359.26	-0.395764	0.110335	-3.58693	0.000334597	0.00235182	0.00095239
ANKLE1	62.8694	0.955689	0.521715	1.83182	0.0669777	0.150791	0.0610638
ANKLE2	3805.04	-0.221424	0.0933647	-2.37161	0.017711	0.0552069	0.0223565
ANKMY1	469.774	0.281592	0.185409	1.51877	0.128822	0.24602	0.0996276
ANKMY2	562.538	-0.0285245	0.129503	-0.220261	0.825668	0.889993	0.36041
ANKRA2	385.342	0.00676221	0.214987	0.031454	0.974907	0.985101	0.398925
ANKRD1	87.0338	1.92298	0.952944	2.01793	0.0435981	0.109489	0.0443384
ANKRD10	3970.27	0.0963286	0.251017	0.383754	0.701161	0.802723	0.325069
ANKRD11	8650.16	-0.513239	0.129878	-3.95171	7.76e-05	0.000723746	0.000293087
ANKRD12	3187.43	0.461586	0.156291	2.95336	0.00314331	0.0141582	0.00573347
ANKRD13A	3050.35	0.0983691	0.111261	0.884129	0.376627	0.535109	0.216697
ANKRD13B	2230.28	0.0728841	0.154311	0.47232	0.636698	0.755703	0.306028
ANKRD13C	1789.45	0.22673	0.143385	1.58127	0.113817	0.223603	0.0905498
ANKRD13D	3016.9	0.241569	0.200598	1.20424	0.228497	0.375978	0.152256
ANKRD16	577.351	0.296491	0.222899	1.33016	0.183467	0.319844	0.129524
ANKRD17	7586.75	-0.178572	0.101682	-1.75619	0.0790568	0.170321	0.0689731
ANKRD18A	136.715	-1.85893	1.20154	-1.54712	0.121833	0.235629	0.0954199
ANKRD18B	870.403	-0.0117709	0.148577	-0.0792243	0.936854	0.962308	0.389695
ANKRD19P	189.354	-0.198383	0.33495	-0.592276	0.553666	0.689428	0.279189
ANKRD20A3	37.7583	0.942627	0.544541	1.73105	0.083443	0.177445	0.0718577
ANKRD20A5P	59.2889	0.427643	0.365576	1.16978	0.24209	0.391616	0.158588
ANKRD23	86.8645	0.129459	0.291421	0.444233	0.656874	0.771736	0.312521
ANKRD24	98.4172	1.87773	0.587145	3.19808	0.00138348	0.0073627	0.00298159
ANKRD26	1492.79	0.0190756	0.16492	0.115665	0.907918	0.945232	0.382779
ANKRD27	6134.46	0.188874	0.0646544	2.92129	0.00348587	0.0153456	0.00621431
ANKRD28	6952.52	0.459176	0.156893	2.92668	0.00342605	0.0151347	0.00612891
ANKRD29	171.42	2.54954	0.705285	3.61491	0.000300449	0.00216747	0.000877734
ANKRD33B	1900.82	-0.321238	0.236904	-1.35598	0.175104	0.309145	0.125191
ANKRD34A	44.4275	0.308457	0.463379	0.66567	0.505622	0.651862	0.263977
ANKRD36	767.84	0.195099	0.156931	1.24321	0.213789	0.357704	0.144855
ANKRD36B	429.614	0.292991	0.232909	1.25796	0.208406	0.350991	0.142137
ANKRD36BP1	429.871	0.112849	0.241396	0.467485	0.640153	0.758051	0.306979
ANKRD36C	1033.67	-0.119649	0.17567	-0.681099	0.495809	0.642563	0.260211
ANKRD37	130.712	0.229167	0.310386	0.73833	0.460314	0.613254	0.248342
ANKRD39	408.426	0.266902	0.188058	1.41925	0.155825	0.283881	0.11496
ANKRD40	3994.17	0.140546	0.075257	1.86755	0.061825	0.141878	0.0574546
ANKRD42	322.932	-0.181947	0.231838	-0.784803	0.432569	0.587896	0.238073
ANKRD44	211.992	-2.1012	0.372108	-5.64674	1.64e-08	6.18e-07	2.5e-07
ANKRD46	609.757	0.588579	0.194098	3.03238	0.00242635	0.0115133	0.00466239
ANKRD49	572.372	0.532923	0.24042	2.21663	0.0266481	0.075385	0.0305278
ANKRD50	7821.75	0.835633	0.193058	4.3284	1.5e-05	0.000190213	7.7e-05
ANKRD52	5485.3	-0.102707	0.0881463	-1.16519	0.243941	0.393701	0.159433
ANKRD54	907.22	-0.0962788	0.132631	-0.725916	0.467891	0.619726	0.250963
ANKRD6	397.527	0.400043	0.271786	1.4719	0.141047	0.263422	0.106675
ANKRD7	70.5458	1.80482	0.409342	4.40908	1.04e-05	0.000140989	5.71e-05
ANKRD9	684.91	-0.495861	0.200322	-2.47532	0.0133115	0.0442278	0.0179104
ANKS1A	1502.87	-0.586803	0.168178	-3.48919	0.000484494	0.0031845	0.00128959
ANKS1B	351.749	1.76319	0.36036	4.89287	9.94e-07	2.01e-05	8.14e-06
ANKS3	466.697	-0.557971	0.21645	-2.57783	0.00994223	0.0351104	0.0142182
ANKS6	2971.53	-0.631757	0.17548	-3.60017	0.000318013	0.00226109	0.000915646
ANKZF1	795.315	0.312157	0.160467	1.94531	0.0517378	0.124414	0.0503824
ANLN	14045.2	-0.778721	0.233393	-3.33652	0.00084833	0.00500944	0.00202861
ANO10	1620.67	0.13174	0.138321	0.952418	0.340885	0.499245	0.202173
ANO3	326.573	0.218132	0.31356	0.695661	0.486641	0.635206	0.257232
ANO5	346.877	0.235674	0.226733	1.03943	0.298603	0.455728	0.184551
ANO6	12841.1	-0.0180447	0.125179	-0.144151	0.885381	0.930766	0.376921
ANO8	840.743	-0.0445544	0.162895	-0.273516	0.784457	0.86155	0.348892
ANP32A-IT1	83.1202	-0.793645	0.33588	-2.36288	0.0181334	0.0563258	0.0228096
ANP32A	14125.4	-0.615504	0.13835	-4.4489	8.63e-06	0.000120169	4.87e-05
ANP32B	14642.8	-0.0763881	0.117513	-0.650041	0.515666	0.659255	0.266971
ANP32E	4284.33	0.291963	0.240698	1.21298	0.225136	0.371812	0.150568
ANPEP	46.5601	2.95585	0.900443	3.28267	0.00102831	0.0058192	0.00235653
ANTXR1	1318.13	-4.86112	0.276451	-17.584	3.27e-69	2.17e-65	8.8e-66
ANTXR2	1690.88	0.0298946	0.274891	0.108751	0.9134	0.948607	0.384146
ANXA1	14450.2	-0.202182	0.137716	-1.46811	0.142075	0.264849	0.107253
ANXA11	9867.88	-0.232322	0.0890965	-2.60753	0.00911969	0.0327443	0.0132601
ANXA2	66141.5	-0.605302	0.169659	-3.56776	0.00036005	0.00249727	0.00101129
ANXA2P1	41.2814	-0.582743	0.511011	-1.14037	0.254132	0.405575	0.164241
ANXA2P2	3108.14	-0.52368	0.181152	-2.89083	0.00384224	0.016604	0.00672391
ANXA2R	88.3887	-0.701855	0.309619	-2.26684	0.0234003	0.0686182	0.0277875
ANXA3	140.877	-3.14252	1.93426	-1.62467	0.104233	0.209316	0.0847641
ANXA4	2004.61	0.326501	0.104689	3.11876	0.00181611	0.00912512	0.00369529
ANXA5	11324	-0.00951563	0.128505	-0.0740487	0.940972	0.964895	0.390742
ANXA6	7744.8	0.343261	0.19706	1.74191	0.0815242	0.174165	0.0705297
ANXA7	5683.06	-0.034031	0.123814	-0.274857	0.783426	0.860631	0.34852
ANXA9	43.9232	0.234014	0.393754	0.594314	0.552302	0.688127	0.278663
AOC2	61.986	0.558576	0.40446	1.38104	0.167266	0.299195	0.121162
AOX1	2065.94	-0.316183	0.26349	-1.19998	0.230146	0.377899	0.153033
AP1AR	1767.17	0.18634	0.19685	0.946606	0.34384	0.502305	0.203413
AP1B1	4665	-0.72137	0.120041	-6.00934	1.86e-09	9.5e-08	3.85e-08
AP1G1	5764.23	-0.203747	0.12348	-1.65005	0.098933	0.201407	0.0815614
AP1G2	93.0394	1.08257	0.351679	3.07829	0.00208194	0.0101877	0.00412561
AP1M1	3972.52	-0.20982	0.107731	-1.94763	0.0514592	0.12399	0.0502109
AP1S1	3875.12	-0.538452	0.151624	-3.55124	0.000383425	0.0026252	0.0010631
AP1S2	830.814	0.26011	0.255399	1.01845	0.308466	0.465497	0.188507
AP1S3	515.665	-0.222243	0.216085	-1.0285	0.303715	0.461349	0.186827
AP2A1	7788.09	-0.125859	0.11158	-1.12798	0.25933	0.411551	0.166661
AP2A2	1237.03	0.0250915	0.19185	0.130787	0.895944	0.937133	0.3795
AP2B1	22261.9	-0.38037	0.103801	-3.6644	0.000247918	0.00186656	0.000755879
AP2M1	11865.8	-0.295934	0.119731	-2.47165	0.0134491	0.0445786	0.0180524
AP2S1	4499.1	-0.546858	0.135754	-4.0283	5.62e-05	0.00055596	0.00022514
AP3B1	6089.09	-0.0468012	0.143266	-0.326674	0.743914	0.831919	0.336892
AP3D1	16058.5	0.21977	0.101403	2.16729	0.0302128	0.0830167	0.0336183
AP3M1	5773.27	-0.150425	0.167717	-0.896896	0.369774	0.528079	0.21385
AP3M2	1743.15	0.101397	0.146562	0.691835	0.489041	0.636902	0.257919
AP3S1	3335.78	-0.053649	0.117038	-0.458392	0.646671	0.763032	0.308996
AP3S2	1486.08	-0.351662	0.0992135	-3.5445	0.000393357	0.00267531	0.00108339
AP4B1-AS1	92.8877	0.451174	0.431038	1.04672	0.295231	0.451941	0.183017
AP4B1	649.144	-0.291765	0.113003	-2.58192	0.00982529	0.0347712	0.0140809
AP4E1	733.847	-0.0377512	0.20294	-0.186021	0.852428	0.908902	0.368067
AP4M1	1116.23	0.265507	0.156022	1.70173	0.0888058	0.18585	0.0752614
AP4S1	694.393	-0.184	0.226278	-0.813161	0.416126	0.572593	0.231876
AP5B1	4387.16	-0.0436988	0.15143	-0.288575	0.772907	0.852593	0.345264
AP5M1	1219.09	0.0203035	0.213752	0.094986	0.924326	0.955185	0.38681
AP5S1	1209.94	-0.346517	0.170747	-2.02942	0.0424153	0.107472	0.0435215
AP5Z1	1259.51	0.461817	0.157548	2.93128	0.00337568	0.0149419	0.00605085
APAF1	1115.05	0.0182928	0.200022	0.0914536	0.927132	0.957075	0.387575
APBA2	262.308	-0.466723	0.321246	-1.45285	0.146265	0.270793	0.10966
APBA3	1203.39	0.274862	0.118863	2.31243	0.0207541	0.0625673	0.0253371
APBB1	1020.36	0.561613	0.188246	2.98339	0.00285072	0.0130974	0.00530388
APBB2	3845.52	0.594954	0.140235	4.24255	2.21e-05	0.000262882	0.000106456
APBB3	1133.67	0.397197	0.16398	2.42223	0.0154257	0.0496172	0.0200929
APC	6343.35	0.458107	0.0948711	4.82874	1.37e-06	2.62e-05	1.06e-05
APC2	963.069	0.267797	0.155731	1.71961	0.0855025	0.180756	0.0731985
APCDD1L-AS1	68.6776	-1.21324	0.635798	-1.90821	0.0563635	0.132357	0.053599
APCDD1L	99.9477	0.12121	0.653444	0.185494	0.852842	0.909124	0.368157
APEH	4741.29	-0.164017	0.0889259	-1.84442	0.0651212	0.147434	0.0597046
APEX1	13081	0.118566	0.122376	0.968866	0.332612	0.490805	0.198756
APEX2	710.413	-0.479543	0.163208	-2.93823	0.00330091	0.0147186	0.00596043
APH1A	4982.21	-0.124317	0.11191	-1.11087	0.266625	0.420222	0.170172
APH1B	1093.74	0.436305	0.192628	2.26501	0.023512	0.0688548	0.0278833
API5	5819.16	-0.0674315	0.130328	-0.517399	0.604877	0.73057	0.29585
APIP	1316.66	0.000292663	0.130885	0.00223603	0.998216	0.998741	0.404448
APITD1-CORT	135.848	-0.634061	0.353083	-1.79578	0.0725289	0.159907	0.0647557
APITD1	783.288	-0.640813	0.184004	-3.48261	0.000496556	0.00324934	0.00131585
APLF	339.04	0.229221	0.194452	1.17881	0.238474	0.387179	0.156791
APLN	373.437	-1.35117	0.351578	-3.84316	0.000121462	0.00103765	0.000420205
APLP1	1593.95	0.930372	0.273357	3.4035	0.000665272	0.00411658	0.00166704
APLP2	19211.4	-0.295784	0.158356	-1.86784	0.0617845	0.141834	0.0574367
APMAP	8353.97	-0.695146	0.140512	-4.94724	7.53e-07	1.61e-05	6.5e-06
APOA1BP	2938	-0.021104	0.138124	-0.15279	0.878564	0.925939	0.374967
APOBEC3B	2334.83	-0.387091	0.360058	-1.07508	0.282339	0.437273	0.177077
APOBEC3C	1902.62	-0.190792	0.145333	-1.31279	0.189253	0.327053	0.132443
APOBEC3D	272.885	0.312113	0.204239	1.52818	0.126468	0.242479	0.0981939
APOBEC3F	410.118	0.961984	0.187704	5.125	2.98e-07	7.37e-06	2.99e-06
APOBEC3G	495.08	1.157	0.221109	5.23274	1.67e-07	4.45e-06	1.8e-06
APOC1	152.718	-0.10704	0.272093	-0.393394	0.694028	0.797369	0.322901
APOD	43.6286	0.813028	0.428283	1.89834	0.057651	0.134717	0.0545547
APOE	427.381	0.813212	0.307314	2.64619	0.00814038	0.0301635	0.012215
APOL1	46.3218	-0.312289	0.531401	-0.587672	0.556753	0.692303	0.280354
APOL2	678.86	-0.306289	0.16325	-1.8762	0.0606284	0.139734	0.0565865
APOL3	37.4086	0.698857	0.837554	0.834402	0.404054	0.560789	0.227096
APOL6	1344.31	-0.352991	0.24691	-1.42964	0.152821	0.279671	0.113255
APOLD1	671.281	-0.0347822	0.305054	-0.11402	0.909222	0.945818	0.383017
APOO	1418.04	-0.296883	0.122655	-2.42048	0.0155	0.049796	0.0201653
APOOL	2167.83	0.121234	0.146161	0.829455	0.406847	0.563724	0.228285
APOPT1	2507.93	0.446422	0.131957	3.38308	0.000716765	0.00437822	0.001773
APP	42262.3	-0.00888572	0.114177	-0.0778242	0.937968	0.963076	0.390005
APPBP2	2889.3	0.495749	0.112305	4.41431	1.01e-05	0.000137909	5.58e-05
APPL1	4921.35	-0.11775	0.162478	-0.724713	0.468628	0.620079	0.251106
APPL2	1620.13	-0.409129	0.136015	-3.00797	0.00262998	0.0122696	0.00496866
APRT	3187.62	-0.629275	0.215794	-2.91609	0.00354447	0.0155474	0.00629603
APTR	417.925	0.423135	0.200039	2.11526	0.0344078	0.0915935	0.0370916
APTX	1527.52	-0.45154	0.175502	-2.57285	0.0100865	0.035488	0.0143712
AQP1	66.0227	0.599607	0.417975	1.43455	0.151415	0.277756	0.11248
AQP11	278.201	0.424958	0.244864	1.73548	0.082655	0.175994	0.0712702
AQP4	178.55	0.488646	0.402409	1.2143	0.224633	0.371089	0.150275
AQR	2424.93	-0.30898	0.125829	-2.45556	0.0140666	0.0461603	0.018693
AR	1767.55	-0.784765	0.863978	-0.908315	0.363712	0.522184	0.211463
ARAF	1872.21	0.256536	0.108578	2.36268	0.0181432	0.0563431	0.0228166
ARAP1	10274.8	-0.306623	0.146765	-2.08921	0.0366891	0.0961662	0.0389433
ARAP2	628.047	0.412362	0.353503	1.1665	0.243411	0.393132	0.159202
ARC	459.843	0.172755	0.32188	0.536708	0.591469	0.720566	0.291799
ARCN1	10787.9	0.106413	0.155332	0.68507	0.4933	0.640755	0.259479
AREL1	4837.35	-0.072995	0.128379	-0.568591	0.569634	0.703063	0.284711
ARF1	10038.2	0.29561	0.0947791	3.11894	0.00181503	0.0091231	0.00369448
ARF3	7243.12	-0.572871	0.167119	-3.42793	0.000608202	0.00382569	0.00154925
ARF4	5308.51	0.119087	0.17112	0.695927	0.486475	0.635051	0.257169
ARF5	4141.5	-0.147273	0.100745	-1.46183	0.143787	0.267329	0.108257
ARF6	6867.18	0.288373	0.14232	2.02623	0.0427413	0.10807	0.0437638
ARFGAP1	4775.16	0.0679923	0.156667	0.433993	0.664294	0.775881	0.314199
ARFGAP2	2161.41	-0.10845	0.0991464	-1.09384	0.274026	0.428592	0.173562
ARFGAP3	2996.76	0.587401	0.115466	5.08721	3.63e-07	8.71e-06	3.53e-06
ARFGEF1	8708.03	0.178343	0.128093	1.39229	0.163833	0.294599	0.1193
ARFGEF2	9506.59	-0.0362974	0.110134	-0.329575	0.741721	0.830513	0.336323
ARFGEF3	6063.03	0.885734	0.39096	2.26554	0.0234798	0.0687754	0.0278512
ARFIP1	1444.37	0.202489	0.14156	1.4304	0.152601	0.279345	0.113123
ARFIP2	1789.06	-0.0569877	0.113322	-0.502881	0.615048	0.738701	0.299143
ARFRP1	1377.86	-0.375394	0.20718	-1.81193	0.0699977	0.155681	0.0630444
ARG2	1505	-0.572442	0.168615	-3.39496	0.00068639	0.00422956	0.0017128
ARGLU1	6704.9	-0.512591	0.34664	-1.47874	0.13921	0.260675	0.105563
ARHGAP1	3593.19	-0.601023	0.135003	-4.45192	8.51e-06	0.000119113	4.82e-05
ARHGAP10	1056.26	-0.151355	0.147179	-1.02837	0.303776	0.461349	0.186827
ARHGAP11A	331.894	-0.320476	0.379227	-0.845076	0.398068	0.55493	0.224724
ARHGAP12	3190.26	0.443902	0.128195	3.46272	0.000534754	0.00344844	0.00139647
ARHGAP17	1844.01	-0.379259	0.0844088	-4.49312	7.02e-06	0.000101214	4.1e-05
ARHGAP18	545.647	0.546455	0.250189	2.18417	0.0289498	0.0803255	0.0325285
ARHGAP19	3952.89	0.160265	0.189034	0.847809	0.396544	0.55354	0.22416
ARHGAP21	6455.38	0.267964	0.106002	2.52793	0.0114739	0.0393905	0.0159515
ARHGAP22	3171.61	0.391323	0.170958	2.28899	0.0220797	0.0655397	0.0265409
ARHGAP23	349.714	0.0431191	0.336468	0.128152	0.898029	0.938207	0.379935
ARHGAP24	1006.6	-0.361177	0.142906	-2.52737	0.0114921	0.0394227	0.0159645
ARHGAP26	1270.93	-0.204106	0.503042	-0.405743	0.684931	0.791083	0.320355
ARHGAP27	110.151	1.2865	0.525443	2.44841	0.0143487	0.0468487	0.0189718
ARHGAP28	55.4725	-1.52257	1.11318	-1.36777	0.171384	0.304351	0.12325
ARHGAP29	5843.86	0.0733329	0.464801	0.157773	0.874636	0.923604	0.374021
ARHGAP31	492.334	-1.3793	0.334158	-4.12769	3.66e-05	0.000390172	0.000158003
ARHGAP32	5260.42	0.232341	0.194777	1.19285	0.232926	0.380866	0.154235
ARHGAP33	1375.96	-0.139464	0.164075	-0.850001	0.395324	0.552591	0.223776
ARHGAP35	21942.8	0.180018	0.0984021	1.82941	0.0673387	0.151337	0.0612853
ARHGAP39	2686.91	0.12639	0.170535	0.74114	0.458609	0.612061	0.247859
ARHGAP4	47.6787	1.20794	0.563399	2.14403	0.0320305	0.0867045	0.0351117
ARHGAP42	171.398	-0.384433	0.794665	-0.483767	0.628551	0.749643	0.303574
ARHGAP44	1049.97	0.172349	0.260246	0.662255	0.507808	0.653288	0.264554
ARHGAP5-AS1	192.636	1.10157	0.267086	4.12439	3.72e-05	0.000394194	0.000159632
ARHGAP5	7451	0.802814	0.223515	3.59177	0.000328439	0.00232158	0.000940141
ARHGDIA	12334.4	-0.188116	0.0997674	-1.88555	0.0593556	0.137419	0.055649
ARHGDIB	80.6076	-2.76769	0.340999	-8.11643	4.8e-16	1.42e-13	5.75e-14
ARHGDIG	49.3417	-0.284406	0.452472	-0.628561	0.529636	0.670336	0.271458
ARHGEF1	3761.29	-0.924556	0.17995	-5.13786	2.78e-07	6.94e-06	2.81e-06
ARHGEF10	541.917	-0.524826	0.536653	-0.977962	0.328093	0.486619	0.19706
ARHGEF10L	1139.78	0.263053	0.133808	1.9659	0.0493101	0.120135	0.0486497
ARHGEF11	4752.33	0.216469	0.114637	1.8883	0.0589855	0.136835	0.0554125
ARHGEF12	17854	-0.210225	0.145922	-1.44066	0.14968	0.275437	0.11154
ARHGEF16	142.774	-0.0498788	0.320242	-0.155754	0.876227	0.924428	0.374355
ARHGEF17	1147.65	0.105031	0.300717	0.349269	0.726887	0.820391	0.332224
ARHGEF18	2979.63	-0.109843	0.13482	-0.814736	0.415224	0.571819	0.231563
ARHGEF2	16242.6	0.842337	0.223519	3.76852	0.000164215	0.0013287	0.000538067
ARHGEF25	1600.89	0.209385	0.133699	1.5661	0.117326	0.229076	0.0927661
ARHGEF28	4244.64	0.4787	0.170661	2.80498	0.00503189	0.0206457	0.00836063
ARHGEF3	694.425	0.929843	0.163508	5.68684	1.29e-08	5.07e-07	2.05e-07
ARHGEF37	35.7692	1.60095	0.399476	4.00763	6.13e-05	0.000600679	0.00024325
ARHGEF39	1036.96	-0.394958	0.212641	-1.85739	0.0632555	0.144166	0.0583813
ARHGEF40	3131.31	-0.189961	0.127709	-1.48744	0.136897	0.257323	0.104205
ARHGEF6	42.1525	0.846214	0.565034	1.49763	0.134229	0.253273	0.102565
ARHGEF7	5158.14	0.138906	0.205915	0.67458	0.499943	0.646482	0.261798
ARHGEF9	2198.87	0.29118	0.141153	2.06286	0.0391256	0.101001	0.0409012
ARID1A	12285.4	-0.0778295	0.112485	-0.691911	0.488993	0.636902	0.257919
ARID1B	11886.7	0.100522	0.150981	0.665796	0.505542	0.651822	0.263961
ARID2	5958.71	0.047995	0.0990753	0.48443	0.628081	0.749564	0.303542
ARID3A	521.469	-0.174639	0.235177	-0.742585	0.457733	0.611138	0.247485
ARID3B	152.518	-0.46172	0.273739	-1.68671	0.0916585	0.190532	0.0771574
ARID4A	1368.76	0.277051	0.184954	1.49795	0.134147	0.2532	0.102535
ARID4B	2544.42	0.305521	0.172939	1.76664	0.0772892	0.167599	0.0678704
ARID5A	391.844	0.389228	0.212213	1.83414	0.0666333	0.150179	0.0608163
ARID5B	864.927	-0.0663892	0.266792	-0.248843	0.803482	0.873578	0.353763
ARIH1	2982.83	0.256929	0.0841841	3.05199	0.00227332	0.0109195	0.00442194
ARIH2	4668.12	-0.539004	0.104071	-5.17922	2.23e-07	5.74e-06	2.32e-06
ARIH2OS	58.13	0.190963	0.378059	0.505116	0.613478	0.737281	0.298568
ARL1	3241.12	0.309648	0.08252	3.7524	0.000175151	0.00139847	0.000566323
ARL13B	1153.68	0.666477	0.135133	4.932	8.14e-07	1.7e-05	6.88e-06
ARL14	121.134	-0.548799	0.540657	-1.01506	0.310077	0.467187	0.189191
ARL14EP	1412.58	0.177404	0.132773	1.33614	0.181502	0.317276	0.128483
ARL15	175.52	0.472189	0.213838	2.20816	0.0272329	0.0767935	0.0310982
ARL16	503.915	0.324823	0.177909	1.82578	0.067884	0.152239	0.0616503
ARL17A	439.831	-0.166344	0.225393	-0.738021	0.460502	0.613296	0.248359
ARL2-SNX15	46.4284	0.650631	1.20711	0.538999	0.589887	0.719434	0.291341
ARL2	5117.27	-0.409572	0.132051	-3.10163	0.00192461	0.0095406	0.00386354
ARL2BP	3789.83	0.406188	0.118654	3.4233	0.000618653	0.00388043	0.00157141
ARL3	1487.03	0.0346218	0.140063	0.247187	0.804764	0.874543	0.354153
ARL4A	882.496	0.370938	0.219659	1.6887	0.0912769	0.189887	0.0768962
ARL4C	4737.91	0.435781	0.233666	1.86498	0.0621844	0.142408	0.0576692
ARL4D	183.906	0.658469	0.356411	1.8475	0.0646746	0.146647	0.059386
ARL5A	2803.09	0.591804	0.20975	2.82148	0.00478031	0.0198275	0.00802931
ARL5B	1097.25	0.756333	0.178439	4.2386	2.25e-05	0.000267031	0.000108136
ARL6	250.335	-0.00396214	0.193618	-0.0204637	0.983674	0.99052	0.401119
ARL6IP1	7310.03	-0.142798	0.215712	-0.661987	0.50798	0.653447	0.264619
ARL6IP4	3903.84	-1.18796	0.177898	-6.67777	2.43e-11	2.04e-09	8.28e-10
ARL6IP5	2225.7	0.242765	0.212187	1.14411	0.252578	0.404015	0.163609
ARL6IP6	1703.63	0.233345	0.181955	1.28244	0.199689	0.339924	0.137655
ARL8A	862.712	0.235815	0.143159	1.64722	0.0995118	0.202152	0.0818633
ARL8B	2942.74	0.456281	0.16539	2.75882	0.00580111	0.0231616	0.00937946
ARMC1	3823.79	0.382346	0.190285	2.00933	0.0445019	0.111227	0.0450421
ARMC10	2034.56	-0.090421	0.126969	-0.712148	0.476373	0.626737	0.253802
ARMC2	289.977	0.0434777	0.259025	0.167851	0.8667	0.918836	0.37209
ARMC3	65.7351	0.601272	0.372968	1.61213	0.106934	0.213419	0.0864257
ARMC4	128.694	-0.501033	0.265657	-1.88601	0.059293	0.137298	0.0556001
ARMC5	747.699	-0.185921	0.213191	-0.872084	0.383162	0.540758	0.218985
ARMC6	3265.7	-0.211267	0.114865	-1.83926	0.0658767	0.148739	0.0602333
ARMC7	307.236	-0.722011	0.203562	-3.54688	0.000389815	0.00265393	0.00107473
ARMC8	2383.48	0.147321	0.0906155	1.62578	0.103996	0.20906	0.0846605
ARMC9	474.124	-0.517558	0.165526	-3.12675	0.00176752	0.00894173	0.00362102
ARMCX1	3325.2	0.59292	0.135796	4.36625	1.26e-05	0.00016611	6.73e-05
ARMCX3	3655.74	0.953356	0.192152	4.96147	7e-07	1.5e-05	6.09e-06
ARMCX5-GPRASP2	1472.21	0.649445	0.265157	2.44928	0.0143142	0.0467653	0.018938
ARMCX5	1186.16	0.531504	0.129823	4.09408	4.24e-05	0.00044143	0.000178761
ARMCX6	1163.42	0.428989	0.191622	2.23873	0.0251737	0.0723988	0.0293185
ARMT1	1146.61	0.195525	0.196264	0.996236	0.319136	0.476413	0.192927
ARNT	3042.85	0.749002	0.120821	6.19925	5.67e-10	3.34e-08	1.35e-08
ARNT2	107.764	0.326026	0.342466	0.951994	0.3411	0.499345	0.202214
ARNTL	235.886	0.0418112	0.209631	0.199452	0.841909	0.901411	0.365034
ARNTL2	14330	-0.317635	0.226405	-1.40295	0.160633	0.289902	0.117398
ARPC1A	11447.3	-0.372884	0.161236	-2.31266	0.0207412	0.0625574	0.0253331
ARPC1B	7159.39	-0.479057	0.162052	-2.95619	0.00311463	0.0140671	0.00569659
ARPC2	8576.5	-0.0840454	0.106125	-0.791944	0.428393	0.583987	0.23649
ARPC3	6705.2	-0.352757	0.117381	-3.00524	0.00265371	0.01235	0.00500122
ARPC4-TTLL3	505.915	1.42022	0.823469	1.72467	0.0845862	0.17936	0.0726333
ARPC4	3241.3	-0.354863	0.109257	-3.24797	0.00116233	0.0064087	0.00259526
ARPC5	5501.16	0.0106725	0.193967	0.0550223	0.956121	0.973993	0.394426
ARPC5L	1103.81	-0.269442	0.224195	-1.20182	0.229433	0.377054	0.152691
ARPP19	7984.48	0.0271976	0.140063	0.194182	0.846033	0.904402	0.366245
ARRB1	1654.29	-0.343956	0.176665	-1.94694	0.0515421	0.124123	0.0502645
ARRB2	3423.2	0.0652947	0.150409	0.434115	0.664205	0.775881	0.314199
ARRDC1-AS1	1013.4	-0.279871	0.181964	-1.53806	0.124035	0.238777	0.0966946
ARRDC1	926.479	0.163939	0.215913	0.759283	0.447683	0.601764	0.243689
ARRDC2	1360.73	0.642304	0.151782	4.23175	2.32e-05	0.000273772	0.000110866
ARRDC3-AS1	40.565	-0.092632	0.599595	-0.154491	0.877223	0.924892	0.374542
ARRDC3	2588.03	0.745839	0.153663	4.85374	1.21e-06	2.37e-05	9.6e-06
ARRDC4	107.069	0.810889	0.361416	2.24364	0.0248553	0.071809	0.0290796
ARSA	1211.21	-0.108436	0.17064	-0.635467	0.525124	0.666355	0.269846
ARSB	2072.02	-0.149908	0.212259	-0.70625	0.480033	0.629621	0.25497
ARSD	908.5	0.719378	0.175684	4.09473	4.23e-05	0.000440872	0.000178535
ARSG	653.65	-0.0655744	0.181231	-0.361828	0.717481	0.813846	0.329574
ARSJ	2187.78	-0.361518	0.171296	-2.11048	0.0348171	0.0923875	0.0374131
ARSK	560.499	0.623106	0.190585	3.26943	0.00107763	0.00603417	0.00244359
ARTN	69.9728	-0.883822	0.315184	-2.80415	0.00504497	0.0206802	0.0083746
ARV1	418.001	-0.608195	0.236284	-2.574	0.0100531	0.0353985	0.0143349
ARVCF	826.992	0.22352	0.173101	1.29127	0.196608	0.335985	0.13606
ASAH1	2932.21	0.631442	0.145987	4.32533	1.52e-05	0.000192333	7.79e-05
ASAP1	16386.2	-0.0959361	0.15726	-0.610047	0.541831	0.67901	0.274971
ASAP2	5929.34	-0.0971078	0.17557	-0.553099	0.580196	0.711415	0.288093
ASAP3	878.747	0.789176	0.18547	4.25501	2.09e-05	0.000249987	0.000101234
ASB1	3100.13	0.151078	0.172274	0.876964	0.380506	0.538608	0.218114
ASB13	968.904	0.502399	0.165469	3.03621	0.0023957	0.0113893	0.00461221
ASB14	41.222	0.0858025	0.437405	0.196162	0.844483	0.903322	0.365807
ASB16-AS1	255.723	-0.0440119	0.22412	-0.196377	0.844315	0.90329	0.365795
ASB16	61.8711	-0.163347	0.396223	-0.41226	0.680149	0.787473	0.318893
ASB3	408.651	-0.177587	0.155934	-1.13886	0.25476	0.406187	0.164489
ASB6	1111.33	0.0888985	0.118613	0.749484	0.453565	0.607156	0.245873
ASB7	824.574	0.584132	0.0994957	5.87093	4.33e-09	1.93e-07	7.81e-08
ASB8	1258.35	0.0323838	0.137773	0.235052	0.814169	0.881095	0.356806
ASB9	26.7403	-1.97731	0.756805	-2.61271	0.00898286	0.0324896	0.0131569
ASCC1	1816.47	0.224627	0.166756	1.34703	0.177969	0.312791	0.126667
ASCC2	2840.99	-0.0471708	0.0982511	-0.480105	0.631153	0.751265	0.304231
ASCC3	5722.49	0.098163	0.12286	0.798983	0.4243	0.580415	0.235044
ASF1A	1414.45	-0.227304	0.170745	-1.33125	0.183107	0.319603	0.129426
ASF1B	1039.9	-0.973317	0.409916	-2.37443	0.0175759	0.0549145	0.0222381
ASH1L-AS1	98.7108	-0.30449	0.323793	-0.940385	0.34702	0.50562	0.204755
ASH1L	7500.67	0.154474	0.106839	1.44586	0.148218	0.273541	0.110773
ASH2L	2303.64	0.106219	0.132198	0.803485	0.421694	0.577919	0.234033
ASIC1	2020.26	-0.346561	0.154923	-2.23699	0.0252872	0.0726312	0.0294126
ASIC3	75.8441	0.271084	0.407778	0.664783	0.506189	0.652278	0.264145
ASL	1294.31	-0.339075	0.149296	-2.27115	0.0231377	0.068013	0.0275424
ASMTL	338.862	0.55692	0.602774	0.923929	0.355523	0.514405	0.208313
ASNA1	2345.15	0.019205	0.141966	0.135279	0.892392	0.934813	0.37856
ASNS	19637.4	-0.874617	0.143253	-6.10539	1.03e-09	5.74e-08	2.32e-08
ASNSD1	3087.38	0.132463	0.134726	0.983202	0.325508	0.484025	0.19601
ASPH	9300.25	-0.0343958	0.166106	-0.207072	0.835954	0.897295	0.363367
ASPHD1	256.302	0.120698	0.20302	0.594513	0.552169	0.688079	0.278643
ASPHD2	189.287	0.343242	0.254626	1.34803	0.177649	0.312329	0.12648
ASPM	4895.99	-0.155799	0.379861	-0.410147	0.681698	0.788374	0.319259
ASPSCR1	1254.15	0.213797	0.141568	1.51021	0.13099	0.249211	0.10092
ASRGL1	958.088	-0.789945	0.167115	-4.72695	2.28e-06	3.98e-05	1.61e-05
ASTE1	334.725	-0.136023	0.138404	-0.982794	0.325709	0.484162	0.196065
ASTN1	55.5476	0.655078	0.470249	1.39304	0.163607	0.294231	0.119151
ASTN2	271.936	0.2201	0.242011	0.90946	0.363107	0.521524	0.211195
ASUN	5830.73	0.30125	0.139448	2.1603	0.0307492	0.0840049	0.0340185
ASXL1	9222.66	0.0617583	0.153804	0.401539	0.688023	0.793273	0.321242
ASXL2	4160.06	-0.0163629	0.0803028	-0.203765	0.838537	0.899277	0.36417
ATAD2	9509.05	-0.436615	0.22413	-1.94805	0.0514091	0.123937	0.0501892
ATAD2B	813.568	0.0243699	0.138295	0.176217	0.860124	0.914178	0.370204
ATAD3A	4119.28	-0.264565	0.113558	-2.32978	0.019818	0.0603885	0.0244548
ATAD3B	2692.36	-0.580575	0.150601	-3.85505	0.000115706	0.000996153	0.0004034
ATAD5	1607.95	-0.661754	0.208859	-3.16843	0.00153265	0.00800609	0.00324213
ATCAY	52.1944	1.17211	0.513007	2.28479	0.022325	0.0660911	0.0267641
ATE1	3474.56	0.685196	0.204135	3.35658	0.000789131	0.00473763	0.00191854
ATF1	2169.58	0.395093	0.107163	3.68684	0.000227057	0.00173089	0.000700938
ATF2	3277.94	0.717018	0.167094	4.29109	1.78e-05	0.000218107	8.83e-05
ATF3	714.684	0.948536	0.521651	1.81833	0.0690132	0.154199	0.0624443
ATF4	20483.6	0.0579505	0.153249	0.378146	0.705322	0.805616	0.326241
ATF5	2845.96	-0.380944	0.161445	-2.35959	0.0182953	0.0567052	0.0229632
ATF6	5881.21	0.439854	0.106901	4.1146	3.88e-05	0.000409051	0.000165649
ATF6B	170.72	0.198889	0.529276	0.375776	0.707083	0.806658	0.326663
ATF7	4558.16	0.479107	0.116089	4.12708	3.67e-05	0.000390893	0.000158295
ATF7IP	4125.52	-0.294268	0.135762	-2.16753	0.0301947	0.0829909	0.0336079
ATF7IP2	297.626	0.554785	0.259425	2.13852	0.0324746	0.087586	0.0354687
ATG10	642.12	-0.0494146	0.133707	-0.369573	0.711701	0.809774	0.327925
ATG101	2519.95	0.029016	0.121718	0.238387	0.811581	0.879531	0.356173
ATG12	2720.19	0.370022	0.123745	2.9902	0.00278794	0.0128622	0.00520865
ATG13	6584.85	0.357714	0.156259	2.28923	0.022066	0.0655308	0.0265372
ATG14	1616.27	1.07241	0.186349	5.75481	8.67e-09	3.63e-07	1.47e-07
ATG16L1	1186.69	0.260569	0.120643	2.15983	0.0307857	0.0840184	0.0340239
ATG16L2	992.5	0.00426155	0.286124	0.0148941	0.988117	0.992898	0.402082
ATG2A	2062.44	0.211491	0.111632	1.89453	0.0581544	0.135437	0.0548462
ATG2B	4179.3	-0.202172	0.129551	-1.56056	0.118628	0.230941	0.0935213
ATG3	3380.14	0.0410588	0.102513	0.400524	0.688771	0.79352	0.321342
ATG4A	289.017	-0.0740202	0.254583	-0.290751	0.771242	0.851427	0.344792
ATG4B	1441.41	-0.369787	0.140173	-2.63808	0.00833765	0.0306558	0.0124143
ATG4C	767.546	0.06617	0.194335	0.340495	0.733484	0.824619	0.333936
ATG4D	719.253	0.466211	0.168554	2.76594	0.00567586	0.0228235	0.00924256
ATG5	2220.04	-0.188479	0.102467	-1.8394	0.0658559	0.148721	0.0602257
ATG7	3720.81	-0.0678518	0.157637	-0.43043	0.666883	0.777864	0.315002
ATG9A	1781.67	-0.0382624	0.142668	-0.268191	0.788552	0.864152	0.349946
ATHL1	1976.09	0.0659877	0.183071	0.360448	0.718512	0.814322	0.329766
ATIC	6645.16	-0.262744	0.0827746	-3.17421	0.00150246	0.00787624	0.00318955
ATL1	241.524	1.85293	0.394881	4.69238	2.7e-06	4.58e-05	1.85e-05
ATL2	2690.85	0.146526	0.151414	0.967717	0.333186	0.491287	0.198951
ATL3	9809.06	0.356008	0.145102	2.45349	0.0141476	0.0463575	0.0187728
ATM	8930	-0.271775	0.210853	-1.28893	0.197423	0.336834	0.136404
ATMIN	2204.55	-0.670316	0.129921	-5.15942	2.48e-07	6.3e-06	2.55e-06
ATN1	13065.7	0.207856	0.129731	1.60221	0.10911	0.216657	0.0877372
ATOH8	641.246	0.671157	0.328924	2.04046	0.0413045	0.105379	0.0426741
ATOX1	2765.75	-0.369097	0.178289	-2.07021	0.0384323	0.0995978	0.0403329
ATP10D	305.842	0.587574	0.285615	2.05722	0.0396648	0.102172	0.0413756
ATP11A	7226.91	-0.40477	0.160663	-2.51937	0.0117564	0.0401167	0.0162456
ATP11B	5680.9	-0.336622	0.151899	-2.2161	0.0266849	0.0754715	0.0305628
ATP11C	3178.38	-0.0730507	0.133185	-0.548492	0.583354	0.714169	0.289208
ATP13A1	3215.49	-1.10224	0.117431	-9.38629	6.22e-21	4.35e-18	1.76e-18
ATP13A2	4245.93	-0.110153	0.121559	-0.906169	0.364846	0.522949	0.211773
ATP13A3	17693.1	0.203144	0.173194	1.17293	0.240825	0.390044	0.157951
ATP13A4	36.2325	0.536312	0.493244	1.08732	0.276898	0.43176	0.174845
ATP1A1-AS1	155.495	0.343093	0.231893	1.47953	0.138999	0.260398	0.10545
ATP1A1	23016.9	-0.573169	0.111563	-5.13765	2.78e-07	6.94e-06	2.81e-06
ATP1A2	240.929	0.255175	0.412903	0.618003	0.536573	0.674696	0.273224
ATP1A3	1012.91	1.00818	0.255914	3.93953	8.16e-05	0.000754078	0.00030537
ATP1B1	1625.31	-0.062148	0.170422	-0.364672	0.715357	0.812103	0.328868
ATP1B2	122.533	0.388782	0.295713	1.31473	0.188602	0.326266	0.132124
ATP1B3	8161.72	-0.524497	0.0959695	-5.46525	4.62e-08	1.49e-06	6.05e-07
ATP2A1-AS1	54.9218	-0.292951	0.398419	-0.735284	0.462166	0.614406	0.248809
ATP2A1	160.575	0.050584	0.293393	0.17241	0.863115	0.91604	0.370958
ATP2A2	21273.1	0.149378	0.125136	1.19373	0.232585	0.380561	0.154111
ATP2A3	41.5969	-2.55085	0.65108	-3.91787	8.93e-05	0.000811639	0.00032868
ATP2B1	4713.1	-0.27665	0.320984	-0.861882	0.388752	0.546133	0.221161
ATP2B2	37.9163	-0.0545985	0.601607	-0.0907545	0.927688	0.957321	0.387675
ATP2B4	6385.7	1.05776	0.37972	2.78563	0.00534232	0.0216986	0.00878702
ATP2C1	8407.43	-0.27716	0.109607	-2.52867	0.0114496	0.0393174	0.0159219
ATP5A1	27954.5	-0.392937	0.114944	-3.41852	0.000629628	0.00393998	0.00159553
ATP5B	44839.5	-0.427698	0.116439	-3.67316	0.000239569	0.0018138	0.000734515
ATP5C1	5939.92	-0.396032	0.0993972	-3.98433	6.77e-05	0.000649611	0.000263065
ATP5D	4448.34	-0.412302	0.152088	-2.71095	0.00670912	0.0260042	0.0105306
ATP5E	5576.36	-0.759005	0.251826	-3.01401	0.00257823	0.0120704	0.00488802
ATP5F1	10651.7	-0.3105	0.0877082	-3.54015	0.000399895	0.00270595	0.0010958
ATP5G1	3933.9	-0.340203	0.141329	-2.40718	0.0160764	0.0512274	0.020745
ATP5G2	11612.1	-0.234249	0.158512	-1.4778	0.13946	0.260961	0.105678
ATP5G3	5883.61	-0.462774	0.151563	-3.05335	0.00226298	0.0108816	0.00440659
ATP5H	3129.44	-0.553632	0.12644	-4.3786	1.19e-05	0.000159458	6.46e-05
ATP5I	1407.35	-0.545463	0.293341	-1.85948	0.0629592	0.143663	0.0581775
ATP5J	3000.93	-0.692191	0.128709	-5.37796	7.53e-08	2.28e-06	9.23e-07
ATP5J2	4149.28	-0.822526	0.179121	-4.592	4.39e-06	6.89e-05	2.79e-05
ATP5L	6406.4	-0.491401	0.197577	-2.48713	0.0128777	0.0431419	0.0174707
ATP5O	6810.85	-0.326265	0.12252	-2.66296	0.00774557	0.0290318	0.0117567
ATP5S	993.548	0.456982	0.161029	2.83789	0.00454128	0.0189778	0.00768523
ATP5SL	2257.76	-0.252649	0.0897195	-2.81598	0.0048628	0.0201006	0.0081399
ATP6AP1	5209.52	0.395992	0.17412	2.27424	0.0229515	0.0675402	0.0273509
ATP6AP1L	96.4538	1.8672	0.407313	4.58419	4.56e-06	7.1e-05	2.88e-05
ATP6AP2	2360.04	0.0950631	0.138042	0.688655	0.49104	0.638901	0.258728
ATP6V0A1	3415.46	0.0551086	0.103037	0.534841	0.59276	0.721503	0.292179
ATP6V0A2	1738.31	-0.336523	0.154205	-2.18232	0.0290862	0.0806201	0.0326478
ATP6V0B	4193.73	-0.0908473	0.141823	-0.640569	0.521803	0.66404	0.268908
ATP6V0C	2800.31	-0.127145	0.138673	-0.91687	0.359211	0.517662	0.209632
ATP6V0D1	1936.94	-0.185623	0.175134	-1.05989	0.289193	0.444835	0.18014
ATP6V0D2	89.903	8.66987	1.18456	7.31908	2.5e-13	3.36e-11	1.36e-11
ATP6V0E1	2458.26	-0.123483	0.110183	-1.1207	0.262414	0.415555	0.168282
ATP6V0E2-AS1	645.329	0.368902	0.234726	1.57163	0.116037	0.227125	0.0919762
ATP6V0E2	3051.33	-0.257856	0.160143	-1.61016	0.107362	0.214057	0.0866842
ATP6V1A	5420.32	0.207037	0.113279	1.82768	0.067597	0.151748	0.0614518
ATP6V1B1-AS1	236.122	-0.146018	0.173622	-0.841008	0.400343	0.5568	0.225481
ATP6V1B1	33.606	1.16101	0.762769	1.52209	0.127985	0.244859	0.0991577
ATP6V1B2	3158.61	0.290149	0.175114	1.65692	0.0975359	0.199539	0.0808051
ATP6V1C1	4717.06	0.1615	0.152682	1.05776	0.290166	0.446067	0.180639
ATP6V1C2	99.531	0.78187	0.413678	1.89004	0.058752	0.136425	0.0552465
ATP6V1D	4220.6	0.427218	0.132382	3.22717	0.00125021	0.00679558	0.00275193
ATP6V1E1	3001.54	0.0645077	0.106547	0.605436	0.544889	0.681909	0.276145
ATP6V1E2	253.584	0.222962	0.220265	1.01224	0.311422	0.468523	0.189732
ATP6V1F	2842.23	0.0865502	0.140081	0.617858	0.536669	0.674696	0.273224
ATP6V1G1	2405.41	0.305811	0.165964	1.84263	0.0653826	0.14795	0.0599136
ATP6V1G2-DDX39B	160.956	-1.92772	0.32295	-5.96909	2.39e-09	1.19e-07	4.82e-08
ATP6V1H	1919.6	0.0642361	0.123127	0.521705	0.601875	0.728364	0.294957
ATP7A	810.149	0.233681	0.183496	1.2735	0.202842	0.344058	0.139329
ATP7B	893.031	0.17377	0.218594	0.794942	0.426647	0.582514	0.235894
ATP8A1	245.235	-0.151136	0.31703	-0.476725	0.633558	0.75305	0.304954
ATP8B1	3875.15	-0.166656	0.493993	-0.337365	0.735842	0.826294	0.334614
ATP8B2	3441.35	-0.229567	0.140187	-1.63757	0.101511	0.205242	0.0831146
ATP8B3	594.507	-0.401782	0.21923	-1.8327	0.0668479	0.150549	0.0609661
ATP9A	7411.38	-0.128144	0.110089	-1.164	0.244426	0.394196	0.159633
ATP9B	965.667	0.143815	0.177288	0.811194	0.417254	0.573626	0.232295
ATPAF1	2145.81	-0.196131	0.150463	-1.30351	0.192399	0.330827	0.133971
ATPAF2	623.595	-0.302043	0.129359	-2.33492	0.0195474	0.059742	0.024193
ATPIF1	1252.29	-0.421309	0.18638	-2.26048	0.0237912	0.0694126	0.0281092
ATR	5208.26	-0.199365	0.120205	-1.65854	0.0972093	0.199128	0.0806385
ATRAID	4203.88	-0.042565	0.122121	-0.348548	0.727429	0.820897	0.332429
ATRIP	627.985	-0.167753	0.140916	-1.19044	0.233872	0.382084	0.154728
ATRN	10744	0.00843771	0.114703	0.0735617	0.941359	0.965069	0.390813
ATRNL1	730.705	0.0433658	0.333021	0.130219	0.896393	0.937139	0.379502
ATRX	6667.46	0.287367	0.146056	1.96752	0.0491237	0.11975	0.0484938
ATXN1	2413.95	0.273728	0.149631	1.82936	0.0673457	0.151337	0.0612853
ATXN10	3929.17	-0.38	0.0936794	-4.05639	4.98e-05	0.000504429	0.000204273
ATXN1L	3915.5	0.220088	0.151684	1.45097	0.146789	0.271446	0.109924
ATXN2	3783.08	0.136745	0.0914442	1.49539	0.134812	0.254157	0.102923
ATXN2L	12316.3	0.192482	0.11285	1.70565	0.0880738	0.184637	0.0747704
ATXN3	1729.5	0.544432	0.104129	5.22845	1.71e-07	4.55e-06	1.84e-06
ATXN7	2696.34	0.478268	0.110494	4.32847	1.5e-05	0.000190213	7.7e-05
ATXN7L1	646.777	0.588004	0.139126	4.22641	2.37e-05	0.000278704	0.000112864
ATXN7L2	657.804	0.512932	0.182673	2.80792	0.00498619	0.0205212	0.00831024
ATXN7L3	2759.87	0.351301	0.0768457	4.57151	4.84e-06	7.48e-05	3.03e-05
ATXN7L3B	3569.5	-0.191908	0.109098	-1.75904	0.0785712	0.169577	0.0686717
AUH	613.927	0.526294	0.142364	3.69681	0.000218325	0.00167391	0.000677862
AUNIP	429.641	-0.357871	0.170243	-2.10212	0.0355426	0.093752	0.0379656
AUP1	5472.09	0.0670187	0.0879945	0.761624	0.446285	0.600247	0.243075
AURKA	3736.27	-0.461901	0.187613	-2.46199	0.0138169	0.0455092	0.0184293
AURKAIP1	4256.2	-0.548866	0.164343	-3.33976	0.000838502	0.00496241	0.00200957
AURKAPS1	35.4934	0.0765344	0.361903	0.211478	0.832514	0.895199	0.362518
AURKB	1926.41	-0.80893	0.235914	-3.42892	0.000605997	0.00381543	0.00154509
AUTS2	1298.22	-0.0387351	0.305772	-0.12668	0.899194	0.939056	0.380278
AVEN	444.363	-0.659529	0.185764	-3.55036	0.000384706	0.00262986	0.00106498
AVIL	116.203	-0.331487	0.206946	-1.6018	0.109199	0.216801	0.0877955
AVL9	2739.07	0.49581	0.112935	4.39023	1.13e-05	0.000152387	6.17e-05
AVPI1	366.007	0.806646	0.298764	2.69994	0.00693513	0.0266936	0.0108098
AXIN1	2570.96	0.218706	0.210404	1.03946	0.298592	0.455728	0.184551
AXIN2	176.326	0.468883	0.2979	1.57396	0.115497	0.226334	0.091656
AXL	38279.4	-0.648179	0.104567	-6.19868	5.69e-10	3.34e-08	1.35e-08
AZI2	3596.37	0.625965	0.102429	6.11119	9.89e-10	5.55e-08	2.25e-08
AZIN1-AS1	74.5875	-0.458767	0.303837	-1.50991	0.131066	0.249284	0.100949
AZIN1	11583.2	-0.131154	0.155125	-0.845473	0.397847	0.554718	0.224638
AZIN2	593.786	0.319748	0.267324	1.19611	0.231655	0.379533	0.153695
B2M	2785.34	0.347944	0.22423	1.55173	0.120728	0.23407	0.0947884
B3GALNT2	3294.97	-0.0400322	0.138832	-0.28835	0.773079	0.852692	0.345305
B3GALT5	62.3051	0.0146506	0.380486	0.038505	0.969285	0.982124	0.397719
B3GALT6	1413.01	-0.351953	0.216791	-1.62347	0.10449	0.209689	0.0849153
B3GAT1	49.058	0.401663	0.400585	1.00269	0.31601	0.473184	0.19162
B3GAT3	1453.1	-0.815816	0.152938	-5.3343	9.59e-08	2.8e-06	1.13e-06
B3GLCT	457.746	-0.156848	0.225667	-0.695041	0.487029	0.635463	0.257336
B3GNT2	529.909	-0.177313	0.222417	-0.79721	0.425329	0.581404	0.235444
B3GNT5	1338.96	0.267882	0.214543	1.24861	0.211806	0.354792	0.143676
B3GNT9	220.893	0.343294	0.289519	1.18574	0.235725	0.384008	0.155507
B3GNTL1	717.609	-0.601651	0.186491	-3.22617	0.0012546	0.00681026	0.00275787
B4GALNT1	1731.28	-0.64641	0.1663	-3.88701	0.000101487	0.000895678	0.000362712
B4GALNT4	1460.94	-0.637519	0.234504	-2.71859	0.00655615	0.0255428	0.0103438
B4GALT1	6291.37	-0.317689	0.190368	-1.66881	0.0951552	0.195957	0.0793544
B4GALT2	4856.55	-0.360365	0.118423	-3.04302	0.00234216	0.0111695	0.00452318
B4GALT3	2417.11	0.506328	0.143088	3.53857	0.000402306	0.0027195	0.00110128
B4GALT4	957.784	0.554995	0.119353	4.65002	3.32e-06	5.45e-05	2.21e-05
B4GALT5	5195.33	-0.293639	0.104051	-2.82206	0.00477165	0.0198038	0.00801969
B4GALT6	5233.25	1.02632	0.321775	3.18957	0.00142483	0.00753156	0.00304997
B4GALT7	1027.83	0.10202	0.156177	0.653231	0.513608	0.658205	0.266545
B4GAT1	1321.59	-0.0848337	0.220378	-0.384947	0.700277	0.802124	0.324827
B9D1	1027.41	-0.263092	0.193126	-1.36229	0.173108	0.306432	0.124092
B9D2	239.724	-0.598043	0.180862	-3.30663	0.00094425	0.0054529	0.0022082
BAALC	90.0103	0.31881	0.434433	0.733854	0.463037	0.61495	0.249029
BABAM1	2669.71	0.0652927	0.128871	0.506651	0.6124	0.736651	0.298313
BACE1-AS	82.1192	0.0549137	0.318864	0.172217	0.863267	0.916129	0.370994
BACE1	1932.27	-0.1178	0.180638	-0.652133	0.514315	0.658605	0.266707
BACE2	3910.53	-0.395292	0.157714	-2.50638	0.0121973	0.0413305	0.0167371
BACH1	3182.67	0.542342	0.179881	3.015	0.00256982	0.0120422	0.00487658
BACH2	123.672	-1.01748	0.397366	-2.56056	0.0104505	0.0365135	0.0147865
BAD	1802.02	-0.193326	0.175508	-1.10152	0.27067	0.424436	0.171879
BAG1	2868.41	0.0171032	0.116602	0.14668	0.883384	0.929553	0.37643
BAG2	2582.52	-0.0881942	0.133103	-0.662601	0.507586	0.653183	0.264512
BAG3	5071.48	-0.120966	0.213584	-0.566363	0.571147	0.704116	0.285137
BAG4	1552.87	0.190907	0.203511	0.938071	0.348208	0.506962	0.205298
BAG5	3026.92	0.127286	0.106322	1.19718	0.231235	0.379172	0.153549
BAG6	671.475	0.479741	0.483784	0.991642	0.321372	0.479126	0.194026
BAGE	74.4071	-1.58226	0.678641	-2.33151	0.0197267	0.0601655	0.0243645
BAGE3	22.9295	6.69573	3.28917	2.03569	0.0417817	0.10625	0.043027
BAHCC1	1312.9	0.487051	0.198409	2.45478	0.0140969	0.0462371	0.0187241
BAHD1	2372	0.422784	0.150512	2.80896	0.00497011	0.0204679	0.00828863
BAIAP2-AS1	726.606	0.102408	0.188267	0.543947	0.586478	0.717201	0.290437
BAIAP2	849.895	0.316574	0.109221	2.89847	0.00374988	0.0162753	0.00659083
BAIAP2L1	2108.07	-0.589519	0.207437	-2.84192	0.00448424	0.0187867	0.00760782
BAIAP2L2	37.9159	0.633057	0.457659	1.38325	0.166588	0.298183	0.120752
BAIAP3	81.4528	0.661373	0.447529	1.47783	0.139452	0.260961	0.105678
BAK1	882.893	-0.0265421	0.147566	-0.179866	0.857258	0.912272	0.369432
BAMBI	52.9383	0.7448	0.403576	1.8455	0.0649643	0.147179	0.0596012
BANF1	6149.92	-0.970938	0.136618	-7.10697	1.19e-12	1.41e-10	5.71e-11
BANP	990.208	0.0820303	0.157733	0.520058	0.603023	0.729391	0.295373
BAP1	4114.59	-0.0821367	0.11904	-0.689994	0.490198	0.638159	0.258428
BARD1	630.465	-0.0885913	0.213263	-0.415408	0.677843	0.785883	0.31825
BASP1	4053.99	-0.452396	0.180849	-2.50151	0.0123666	0.0418188	0.0169349
BATF2	45.5272	1.70629	0.419858	4.06398	4.82e-05	0.000492426	0.000199412
BATF3	405.66	-0.214576	0.183659	-1.16834	0.242669	0.392172	0.158813
BAX	2675.41	-0.331451	0.124132	-2.67015	0.00758177	0.0285469	0.0115603
BAZ1A	5707.64	0.198235	0.146969	1.34883	0.177393	0.312026	0.126357
BAZ1B	13334.8	-0.152157	0.104086	-1.46184	0.143784	0.267329	0.108257
BAZ2A	7207.29	0.360896	0.0799527	4.51387	6.37e-06	9.26e-05	3.75e-05
BAZ2B	1028.79	0.562972	0.152874	3.6826	0.000230871	0.00175594	0.000711083
BBC3	606.434	0.500307	0.348693	1.43481	0.151342	0.277728	0.112468
BBIP1	361.261	-0.852052	0.148908	-5.72201	1.05e-08	4.23e-07	1.71e-07
BBOX1-AS1	155.751	0.176079	0.203774	0.86409	0.387539	0.54474	0.220597
BBS1	987.927	0.276343	0.146314	1.8887	0.0589324	0.136749	0.0553775
BBS10	619.581	-0.939818	0.241339	-3.89418	9.85e-05	0.0008753	0.00035446
BBS12	204.391	1.27603	0.224646	5.68021	1.35e-08	5.21e-07	2.11e-07
BBS2	3449.3	0.734383	0.108093	6.79402	1.09e-11	1.02e-09	4.11e-10
BBS4	391.302	-0.701792	0.153838	-4.5619	5.07e-06	7.76e-05	3.14e-05
BBS5	855.234	0.590726	0.118677	4.97761	6.44e-07	1.4e-05	5.69e-06
BBS7	983.621	0.261634	0.157504	1.66112	0.0966898	0.198296	0.0803016
BBS9	358.616	0.834042	0.222455	3.74927	0.000177352	0.00141266	0.000572067
BBX	6968.39	0.173604	0.135645	1.27985	0.2006	0.341081	0.138123
BCAM	1260.04	0.527047	0.264061	1.99593	0.0459415	0.113827	0.0460954
BCAN	1134.23	0.0149402	0.327724	0.0455877	0.963639	0.978862	0.396398
BCAP29	6055.09	0.436639	0.321796	1.35688	0.17482	0.308846	0.12507
BCAP31	8418.12	-0.518932	0.120689	-4.29974	1.71e-05	0.000211524	8.57e-05
BCAR1	3617.4	0.084961	0.148215	0.573228	0.56649	0.700287	0.283587
BCAR3	8193.13	0.532578	0.223579	2.38206	0.0172161	0.0540567	0.0218907
BCAS1	87.798	0.473673	0.415668	1.13955	0.254476	0.406075	0.164443
BCAS2	2008.31	0.237846	0.111526	2.13265	0.0329531	0.0884999	0.0358387
BCAS3	897.621	0.241878	0.170487	1.41874	0.155973	0.284085	0.115043
BCAS4	1169.22	0.0900044	0.250524	0.359265	0.719397	0.814978	0.330032
BCAT1	10297.3	-0.585895	0.194055	-3.01922	0.00253426	0.011936	0.00483356
BCAT2	3021.53	-0.373498	0.0899619	-4.15173	3.3e-05	0.00035881	0.000145303
BCCIP	5027.91	-0.493094	0.150931	-3.26702	0.00108686	0.00607563	0.00246037
BCDIN3D-AS1	277.15	0.300757	0.287339	1.0467	0.295239	0.451941	0.183017
BCDIN3D	192.491	-0.607478	0.248712	-2.4425	0.0145859	0.047414	0.0192007
BCHE	169.779	-1.22851	0.81502	-1.50734	0.131723	0.250141	0.101297
BCKDHA	2559.38	0.465538	0.178939	2.60166	0.00927748	0.0332302	0.0134568
BCKDHB	1345.88	-0.00337916	0.13925	-0.0242669	0.98064	0.988887	0.400458
BCKDK	2801.12	-0.234982	0.126032	-1.86446	0.0622573	0.142526	0.057717
BCL10	1475.77	0.376588	0.189073	1.99176	0.0463979	0.114702	0.0464495
BCL11A	342.603	-0.42234	0.262054	-1.61165	0.107037	0.213593	0.0864962
BCL11B	46.9414	-0.131479	0.360799	-0.36441	0.715552	0.812143	0.328884
BCL2	1567.2	-0.0118884	0.143862	-0.0826374	0.93414	0.960604	0.389004
BCL2A1	320.896	0.0332459	0.382767	0.0868567	0.930785	0.959218	0.388443
BCL2L1	5044.12	-0.0190006	0.153388	-0.123873	0.901416	0.940812	0.380989
BCL2L11	1119.01	0.764824	0.151564	5.04623	4.51e-07	1.04e-05	4.22e-06
BCL2L12	1678.49	-0.120436	0.134336	-0.896526	0.369972	0.528191	0.213895
BCL2L13	3839.63	0.108897	0.115772	0.940616	0.346902	0.505558	0.20473
BCL2L2	3103.3	0.557629	0.0805532	6.9225	4.44e-12	4.44e-10	1.8e-10
BCL3	1732.72	0.21084	0.188956	1.11582	0.2645	0.417763	0.169177
BCL6	1934.3	1.15082	0.244163	4.7133	2.44e-06	4.2e-05	1.7e-05
BCL7A	1976.52	-0.0504059	0.156903	-0.321256	0.748017	0.834688	0.338014
BCL7B	4282.72	-0.0378533	0.106217	-0.356378	0.721558	0.816314	0.330573
BCL7C	1461.68	-0.372933	0.206195	-1.80864	0.070507	0.156408	0.0633387
BCL9	1583.48	0.222814	0.153948	1.44733	0.147805	0.27293	0.110525
BCL9L	6116.69	-0.139505	0.149915	-0.930559	0.352081	0.510647	0.206791
BCLAF1	8418.39	-0.105171	0.173733	-0.60536	0.54494	0.681909	0.276145
BCOR	1733.53	0.12487	0.136716	0.913355	0.361056	0.519418	0.210342
BCORL1	1252.31	0.133068	0.164045	0.811168	0.417269	0.573626	0.232295
BCR	2583.89	-0.291522	0.143563	-2.03061	0.0422943	0.107206	0.0434138
BCS1L	960.508	-0.525728	0.152985	-3.43646	0.000589373	0.00373195	0.00151128
BCYRN1	107.078	-1.26105	0.373228	-3.37876	0.000728125	0.00442729	0.00179287
BDH1	49.1395	0.617239	1.39195	0.443434	0.657452	0.772006	0.31263
BDH2	144.741	0.298162	0.307216	0.970529	0.331783	0.489985	0.198423
BDKRB1	1101.09	-0.475753	0.453216	-1.04973	0.293844	0.45048	0.182426
BDKRB2	67.7942	-0.371604	0.471118	-0.78877	0.430247	0.58596	0.237289
BDNF-AS	41.831	2.39696	0.684442	3.50207	0.000461665	0.00307084	0.00124356
BDNF	1214.57	1.86292	0.673163	2.76741	0.00565036	0.0227484	0.00921216
BDP1	504.86	0.464014	0.387854	1.19636	0.231556	0.379422	0.15365
BECN1	2591.26	0.549632	0.110337	4.98138	6.31e-07	1.38e-05	5.6e-06
BEGAIN	52.0053	1.09731	0.507122	2.1638	0.0304798	0.0834573	0.0337967
BEND3	1257.14	-0.271929	0.118469	-2.29535	0.021713	0.0647692	0.0262288
BEND3P3	590.038	0.489181	0.260086	1.88084	0.0599931	0.138558	0.0561101
BEND6	327.385	-0.339074	0.277042	-1.22391	0.220986	0.366019	0.148222
BEND7	811.378	0.380767	0.175557	2.1689	0.0300899	0.082764	0.033516
BEST1	67.1547	1.31967	0.498698	2.64623	0.00813956	0.0301635	0.012215
BEST3	192.613	0.167763	0.350902	0.478089	0.632587	0.752366	0.304677
BET1	1295.5	0.65257	0.154702	4.21823	2.46e-05	0.000286477	0.000116011
BET1L	1869.99	0.104323	0.102309	1.01968	0.307879	0.465032	0.188319
BEX4	42.6505	0.900668	0.43175	2.08609	0.0369709	0.0966763	0.0391498
BEX5	47.1333	1.61328	0.471193	3.42382	0.000617477	0.00387488	0.00156916
BFAR	82.3323	0.279934	0.712539	0.392868	0.694417	0.797589	0.32299
BFSP1	1083.28	0.362409	0.286162	1.26644	0.205354	0.347478	0.140714
BHLHB9	566.744	0.186881	0.286897	0.651387	0.514797	0.658904	0.266829
BHLHE40	1661.3	0.50151	0.207925	2.41198	0.0158662	0.0507217	0.0205402
BHLHE41	967.577	0.168362	0.22185	0.758898	0.447914	0.601891	0.243741
BICC1	470.671	-0.599494	0.93089	-0.644	0.519575	0.662028	0.268094
BICD1	1994.45	-0.075647	0.132385	-0.571418	0.567716	0.701541	0.284095
BICD2	4013.48	0.300374	0.156007	1.92539	0.0541803	0.12866	0.0521019
BID	2141.24	-0.308672	0.123002	-2.50947	0.0120911	0.0410333	0.0166168
BIN1	3272.26	-0.0482532	0.136205	-0.35427	0.723137	0.817614	0.331099
BIN3	987.718	-0.154021	0.176204	-0.874111	0.382058	0.539709	0.21856
BIRC2	4777.86	0.740392	0.251753	2.94094	0.00327214	0.0146197	0.00592038
BIRC3	6285.81	0.186234	0.271452	0.686063	0.492673	0.640191	0.259251
BIRC5	5041.91	-0.747585	0.230244	-3.24693	0.00116659	0.00642684	0.0026026
BIRC6	10935.6	-0.300651	0.0994459	-3.02326	0.0025007	0.0117987	0.004778
BIVM	3518.86	-0.217061	0.21426	-1.01307	0.311026	0.468086	0.189555
BLCAP	1439.22	-0.196325	0.13894	-1.41302	0.15765	0.286031	0.11583
BLID	85.6521	0.20176	0.480563	0.41984	0.674602	0.783367	0.317231
BLM	760.479	-0.559552	0.240709	-2.3246	0.0200934	0.0610323	0.0247155
BLMH	1587.34	-0.23317	0.115306	-2.02217	0.0431583	0.108713	0.044024
BLOC1S1-RDH5	73.1269	-0.473412	1.56537	-0.302427	0.762326	0.844857	0.342132
BLOC1S1	2155.69	-0.33857	0.222312	-1.52295	0.127771	0.24459	0.0990488
BLOC1S2	1135.58	0.168742	0.127755	1.32083	0.186559	0.323573	0.131034
BLOC1S3	887.93	0.58384	0.121179	4.81799	1.45e-06	2.75e-05	1.11e-05
BLOC1S4	437.131	-0.122865	0.19247	-0.638356	0.523242	0.665181	0.269371
BLOC1S5-TXNDC5	317.792	24.8731	3.0944	8.03809	9.13e-16	2.38e-13	9.64e-14
BLOC1S5	1366.68	0.110264	0.150736	0.731505	0.464471	0.616405	0.249618
BLOC1S6	2276	0.306371	0.154016	1.98922	0.0466772	0.115243	0.0466685
BLVRA	1740.58	-0.319763	0.127878	-2.50052	0.012401	0.0419034	0.0169691
BLVRB	3343.19	0.710765	0.144884	4.90575	9.31e-07	1.91e-05	7.75e-06
BLZF1	929.701	-0.0955528	0.23677	-0.403568	0.68653	0.792036	0.320741
BMF	62.4062	1.6962	0.444224	3.81835	0.00013435	0.00112801	0.000456798
BMI1	4311.97	0.612641	0.145182	4.21982	2.44e-05	0.000285709	0.0001157
BMP1	1405.86	-0.0851818	0.1571	-0.542216	0.58767	0.718002	0.290761
BMP2	248.14	2.52854	0.420721	6.01002	1.85e-09	9.5e-08	3.85e-08
BMP2K	1118.12	0.157008	0.168883	0.929689	0.352532	0.511078	0.206965
BMP6	3237.03	-0.0648851	0.179581	-0.361315	0.717864	0.814073	0.329665
BMP7	1121.96	0.406183	0.243139	1.67058	0.0948043	0.195423	0.079138
BMP8A	72.4222	0.717052	0.421928	1.69947	0.0892315	0.186565	0.075551
BMP8B	73.9723	-0.550616	0.381807	-1.44213	0.149266	0.274941	0.11134
BMPR1A	4338.32	0.106781	0.138291	0.772148	0.440027	0.594995	0.240948
BMPR1B	716.626	0.208225	0.155633	1.33792	0.180922	0.316684	0.128244
BMPR2	3775.85	0.223682	0.132933	1.68266	0.0924406	0.191647	0.0776091
BMS1	4642.45	-0.752281	0.134813	-5.58019	2.4e-08	8.6e-07	3.48e-07
BMS1P17	90.8192	-1.05941	0.318211	-3.32926	0.000870783	0.00512158	0.00207402
BMS1P20	1145.67	-0.029647	0.152152	-0.194851	0.845509	0.904059	0.366106
BMS1P4	242.465	-0.479235	0.249706	-1.91919	0.0549597	0.129829	0.0525755
BMS1P6	154.99	-1.14784	0.249082	-4.6083	4.06e-06	6.45e-05	2.61e-05
BNC2	3072.46	-0.149953	0.163956	-0.914597	0.360403	0.518647	0.21003
BNIP1	1000.75	0.566314	0.172617	3.28075	0.00103532	0.00584791	0.00236816
BNIP2	2826.08	-0.0503716	0.213215	-0.236248	0.81324	0.880376	0.356516
BNIP3	5078.65	-0.324374	0.257286	-1.26075	0.207398	0.350002	0.141736
BNIP3L	6163.72	0.653667	0.216711	3.01631	0.00255875	0.0120119	0.00486432
BOC	159.454	1.35177	0.531407	2.54377	0.0109665	0.037962	0.015373
BOD1	5357.62	0.27123	0.124643	2.17606	0.0295504	0.0815284	0.0330156
BOD1L1	4371.86	0.164105	0.131423	1.24867	0.211785	0.354792	0.143676
BOK	1766.03	-0.536272	0.143023	-3.74954	0.000177157	0.00141195	0.000571783
BOLA2B	328.655	-1.08213	0.364288	-2.97054	0.00297278	0.0135599	0.00549118
BOLA3-AS1	353.861	0.0482665	0.188271	0.256367	0.797668	0.869816	0.352239
BOLA3	1295.69	-0.596157	0.149867	-3.9779	6.95e-05	0.000662893	0.000268444
BOP1	18144.8	0.0718023	0.156177	0.45975	0.645696	0.762507	0.308783
BORA	1938.05	0.00176937	0.230801	0.00766621	0.993883	0.996082	0.403371
BPGM	208.063	-1.10709	0.368511	-3.00422	0.00266259	0.0123826	0.00501444
BPHL	1046.24	0.0862857	0.137086	0.629427	0.52907	0.66983	0.271253
BPNT1	705.505	0.0656893	0.183656	0.357675	0.720586	0.81577	0.330353
BPTF	6826.6	0.166858	0.0626891	2.66167	0.00777532	0.0291028	0.0117854
BRAF	1556.13	0.490452	0.11	4.45865	8.25e-06	0.000115922	4.69e-05
BRAP	1954.07	0.503943	0.129919	3.8789	0.000104928	0.000919364	0.000372304
BRAT1	1879.19	-0.266407	0.107538	-2.47732	0.0132373	0.0440582	0.0178417
BRCA1	3211.97	-0.630455	0.260829	-2.41712	0.015644	0.050186	0.0203232
BRCA2	1265.22	-0.148505	0.300875	-0.493578	0.621605	0.744427	0.301462
BRCC3	1931.03	-0.11341	0.21288	-0.532743	0.594211	0.722545	0.2926
BRD1	2660.97	0.448407	0.141747	3.16342	0.00155925	0.00810375	0.00328168
BRD2	1361.68	0.136992	0.150441	0.910603	0.362505	0.520883	0.210936
BRD3	4980.58	0.242079	0.137401	1.76184	0.0780958	0.168852	0.0683782
BRD4	8723.09	0.240172	0.133287	1.80192	0.0715583	0.158239	0.0640802
BRD7	4581.03	-0.113337	0.101343	-1.11835	0.263417	0.416547	0.168684
BRD8	6108.05	-0.247348	0.101748	-2.43098	0.015058	0.0486698	0.0197092
BRD9	3017.91	0.0479106	0.1314	0.364616	0.715398	0.812103	0.328868
BRE	3021.9	0.0078055	0.0912748	0.0855165	0.931851	0.959434	0.388531
BRF1	2794.24	0.146242	0.123675	1.18247	0.237018	0.385614	0.156157
BRF2	637.267	0.233381	0.15751	1.48169	0.138423	0.259676	0.105158
BRI3	3699.19	0.19202	0.155988	1.23099	0.218325	0.363011	0.147004
BRI3BP	721.783	-0.724347	0.152714	-4.74316	2.1e-06	3.75e-05	1.52e-05
BRICD5	50.2037	-0.724402	0.358034	-2.02328	0.0430444	0.108569	0.043966
BRIP1	1005.88	-0.501683	0.301023	-1.66659	0.0955952	0.196596	0.0796133
BRIX1	3512.17	0.238581	0.184321	1.29438	0.195534	0.334691	0.135536
BRK1	4249.31	-0.131092	0.135744	-0.96573	0.334179	0.492299	0.199361
BRMS1	2663.45	0.0200272	0.153015	0.130883	0.895868	0.937133	0.3795
BRMS1L	810.425	0.622372	0.173323	3.59082	0.000329642	0.00232755	0.000942561
BROX	2201.31	1.10107	0.218968	5.02845	4.94e-07	1.13e-05	4.57e-06
BRPF1	1615.24	0.404879	0.159576	2.53722	0.0111736	0.0385687	0.0156187
BRPF3	4989.02	0.506178	0.116725	4.33649	1.45e-05	0.000185285	7.5e-05
BRSK1	1109.02	0.917133	0.173332	5.29118	1.22e-07	3.39e-06	1.37e-06
BRSK2	1017.93	0.193067	0.211325	0.9136	0.360927	0.519289	0.21029
BRWD1	5857.21	-0.20507	0.139297	-1.47218	0.140973	0.263348	0.106645
BRWD3	2166.07	-0.0325095	0.127879	-0.25422	0.799326	0.871123	0.352768
BSCL2	916.122	0.0740742	0.225956	0.327826	0.743044	0.831434	0.336696
BSDC1	2822.18	0.111707	0.114117	0.978881	0.327639	0.486108	0.196853
BSG	23207.5	-0.0815934	0.134126	-0.608332	0.542967	0.679922	0.27534
BSN	1255.21	1.45389	0.302059	4.81326	1.48e-06	2.8e-05	1.14e-05
BTAF1	5953.8	-0.261908	0.13682	-1.91425	0.0555885	0.130844	0.0529863
BTBD1	4392.13	0.431596	0.133592	3.23071	0.00123485	0.00673602	0.00272781
BTBD10	1563.74	0.241605	0.132704	1.82063	0.0686625	0.153605	0.0622035
BTBD2	8052.98	0.0634415	0.124917	0.507871	0.611544	0.736087	0.298085
BTBD3	6092.03	0.329278	0.166162	1.98166	0.0475171	0.116732	0.0472715
BTBD6	1953.04	-0.0869427	0.178541	-0.486961	0.626286	0.747947	0.302887
BTBD7	220.953	0.225706	0.402751	0.56041	0.5752	0.707338	0.286442
BTBD8	88.3711	0.356776	0.291406	1.22433	0.220829	0.365906	0.148177
BTBD9	1096.18	0.25127	0.180138	1.39488	0.163053	0.293433	0.118828
BTD	324.918	-1.03559	0.242627	-4.26823	1.97e-05	0.000238195	9.65e-05
BTF3	21361.3	-0.238236	0.138125	-1.72479	0.0845653	0.179344	0.0726269
BTF3L4	4068.06	0.199748	0.123651	1.61541	0.106222	0.212349	0.0859923
BTG1	4313.04	1.2657	0.157346	8.04407	8.69e-16	2.31e-13	9.37e-14
BTG2	145.27	0.428523	0.230702	1.85747	0.0632441	0.144165	0.0583807
BTG3	2192.05	0.128049	0.202253	0.633111	0.526661	0.668051	0.270533
BTN2A1	1510.04	0.394801	0.16287	2.42403	0.0153494	0.0493957	0.0200032
BTN2A2	306.842	0.0866488	0.266938	0.324603	0.745482	0.833182	0.337404
BTN2A3P	75.6081	-0.0867173	0.363936	-0.238277	0.811667	0.879531	0.356173
BTN3A1	818.956	0.190012	0.160863	1.18121	0.23752	0.386242	0.156412
BTN3A2	1465.48	0.240214	0.131367	1.82857	0.0674639	0.151552	0.0613722
BTN3A3	207.712	0.550966	0.278173	1.98066	0.0476295	0.11695	0.04736
BTNL9	280.12	-1.12001	0.37664	-2.97369	0.00294239	0.0134622	0.00545161
BTRC	1976.84	-0.13691	0.173238	-0.790303	0.429351	0.584977	0.236891
BUB1	7002.81	-0.111877	0.238216	-0.469647	0.638608	0.757092	0.30659
BUB1B	2856.69	-0.471567	0.233152	-2.02257	0.043117	0.10867	0.0440069
BUB3	8942.61	-0.333372	0.2109	-1.58071	0.113945	0.223787	0.0906244
BUD13	1609.56	-0.0356612	0.187057	-0.190643	0.848805	0.906312	0.367018
BUD31	3628.99	-0.139059	0.135873	-1.02345	0.306095	0.463513	0.187703
BVES-AS1	72.8108	-0.0341052	0.282395	-0.120771	0.903872	0.942537	0.381688
BVES	847.481	0.216831	0.183601	1.18099	0.237607	0.386296	0.156434
BYSL	1820.06	0.0517377	0.0910311	0.568352	0.569796	0.703132	0.284739
BZW1	10850.1	-0.0103193	0.142721	-0.072304	0.94236	0.965719	0.391076
BZW2	2118.89	-0.378834	0.129056	-2.93541	0.00333106	0.0148116	0.00599806
C10orf10	350.888	-1.21045	0.705659	-1.71535	0.0862818	0.18197	0.0736902
C10orf12	1347.12	-0.223468	0.161122	-1.38696	0.165455	0.296698	0.12015
C10orf2	2044.66	-0.573754	0.123606	-4.64179	3.45e-06	5.63e-05	2.28e-05
C10orf32	592.065	-0.0197356	0.15109	-0.130621	0.896075	0.937139	0.379502
C10orf35	305.299	-0.553459	0.284954	-1.94228	0.0521034	0.124909	0.0505831
C10orf54	60.2684	1.81438	0.639027	2.83929	0.00452142	0.0189067	0.00765644
C10orf55	487.72	-0.956291	0.260424	-3.67206	0.000240602	0.00182058	0.000737261
C10orf76	1732.67	-0.135808	0.172624	-0.786728	0.431441	0.587113	0.237756
C10orf88	781.771	0.128848	0.20837	0.61836	0.536338	0.674668	0.273212
C10orf90	31.7843	0.61306	0.509986	1.20211	0.22932	0.376914	0.152634
C10orf95	65.9191	-0.202755	0.420519	-0.482156	0.629695	0.750422	0.303889
C11orf1	706.973	-0.607234	0.278995	-2.17651	0.0295172	0.0815091	0.0330078
C11orf24	1527.27	-0.752274	0.123523	-6.09017	1.13e-09	6.23e-08	2.52e-08
C11orf30	2051.85	-0.143797	0.17092	-0.841307	0.400176	0.556729	0.225452
C11orf31	3477.99	-0.819498	0.16274	-5.03564	4.76e-07	1.1e-05	4.44e-06
C11orf45	351.729	0.0056323	0.284168	0.0198203	0.984187	0.990812	0.401237
C11orf49	830.658	-0.0456383	0.182678	-0.249829	0.80272	0.873249	0.353629
C11orf54	1695.25	-0.00816755	0.168991	-0.0483312	0.961452	0.97777	0.395956
C11orf57	2272.68	-0.0834046	0.183872	-0.453602	0.650115	0.765959	0.310181
C11orf58	5529.95	0.0149621	0.128005	0.116887	0.906949	0.944488	0.382478
C11orf63	443.001	0.904486	0.244865	3.69381	0.000220919	0.00169185	0.000685129
C11orf68	5156.58	-0.164506	0.0959477	-1.71454	0.0864296	0.182195	0.0737813
C11orf70	254.581	2.04859	0.278035	7.3681	1.73e-13	2.4e-11	9.72e-12
C11orf71	649.507	0.151869	0.254811	0.596008	0.55117	0.686898	0.278165
C11orf73	1629.62	-0.47348	0.164955	-2.87036	0.00410011	0.0174968	0.00708546
C11orf74	436.817	-0.349271	0.215015	-1.6244	0.10429	0.209398	0.0847974
C11orf80	824.538	-0.251309	0.178152	-1.41064	0.15835	0.286753	0.116123
C11orf84	2144.18	-0.563055	0.0994113	-5.66389	1.48e-08	5.68e-07	2.3e-07
C11orf91	75.8843	-0.988044	0.294384	-3.35631	0.000789889	0.00473925	0.0019192
C11orf95	1477.51	0.375494	0.115337	3.25561	0.00113149	0.00628291	0.00254431
C11orf96	37.8791	-0.3332	0.443097	-0.751981	0.452062	0.605632	0.245256
C11orf98	2114.13	-0.591817	0.142509	-4.15285	3.28e-05	0.000357654	0.000144835
C12orf10	1801.02	-0.99141	0.206495	-4.80112	1.58e-06	2.95e-05	1.19e-05
C12orf29	1340.05	0.210512	0.152942	1.37642	0.168692	0.301139	0.121949
C12orf4	1674.56	-0.0654905	0.160348	-0.408428	0.68296	0.789422	0.319683
C12orf43	694.847	-0.0626938	0.138027	-0.454214	0.649675	0.765554	0.310017
C12orf45	609.027	0.475874	0.233923	2.03431	0.0419199	0.1065	0.043128
C12orf49	2806.22	0.0278112	0.105909	0.262596	0.792862	0.867065	0.351125
C12orf56	59.5323	-0.0830048	0.973261	-0.0852852	0.932035	0.959434	0.388531
C12orf57	2250.49	-1.91493	0.225406	-8.49547	1.97e-17	7.29e-15	2.95e-15
C12orf60	50.6234	-1.21938	0.342592	-3.55928	0.000371872	0.00255825	0.00103598
C12orf65	1003.04	-0.0288642	0.15492	-0.186317	0.852196	0.9089	0.368066
C12orf66	438.568	0.608076	0.183881	3.3069	0.000943332	0.0054529	0.0022082
C12orf73	344.769	0.0190429	0.184835	0.103027	0.917942	0.95095	0.385095
C12orf75	1902	-0.771286	0.222659	-3.46397	0.000532257	0.00343698	0.00139183
C12orf76	301.24	0.346424	0.158431	2.1866	0.0287721	0.0799157	0.0323625
C14orf1	2189.96	0.050366	0.212303	0.237237	0.812473	0.879975	0.356353
C14orf119	1889.06	-0.0963684	0.146042	-0.659867	0.509339	0.654689	0.265122
C14orf132	1114.05	1.07854	0.297475	3.62564	0.000288252	0.00209537	0.000848539
C14orf159	2845.42	0.218875	0.127391	1.71813	0.0857732	0.181214	0.0733841
C14orf166	7375.8	-0.0885439	0.148071	-0.597984	0.549851	0.685933	0.277774
C14orf169	1670.03	-0.0680611	0.128124	-0.531211	0.595273	0.723348	0.292926
C14orf2	2814.49	-0.51844	0.17527	-2.95795	0.0030969	0.0140013	0.00566993
C14orf28	186.073	0.983367	0.31907	3.08197	0.00205632	0.0100846	0.00408385
C14orf79	708.317	0.417114	0.189125	2.2055	0.0274193	0.0771316	0.0312351
C14orf80	872.706	-0.593833	0.180716	-3.28601	0.00101619	0.00576724	0.00233549
C14orf93	681.729	0.493368	0.196434	2.51163	0.0120175	0.0408461	0.016541
C15orf39	934.436	0.228196	0.131008	1.74185	0.0815345	0.174165	0.0705297
C15orf40	338.16	-0.269527	0.140459	-1.91891	0.0549961	0.129879	0.0525956
C15orf41	308.722	0.734258	0.18142	4.04728	5.18e-05	0.000520903	0.000210944
C15orf48	1158.4	0.70068	0.454668	1.54108	0.123297	0.237632	0.0962309
C15orf52	1280.36	0.370772	0.177021	2.09451	0.0362146	0.0951097	0.0385155
C15orf57	499.962	0.422385	0.147294	2.86764	0.00413552	0.0176027	0.00712836
C15orf59	183.506	0.3841	0.266522	1.44116	0.14954	0.275257	0.111468
C15orf61	1255.06	0.214744	0.291789	0.735956	0.461758	0.61426	0.24875
C15orf62	68.143	-0.0240741	0.263606	-0.091326	0.927234	0.957075	0.387575
C15orf65	82.0052	1.96289	0.356216	5.51038	3.58e-08	1.22e-06	4.94e-07
C16orf13	1482.84	-0.31768	0.169614	-1.87296	0.0610743	0.140535	0.0569106
C16orf45	187.905	0.402312	0.293225	1.37202	0.170056	0.302559	0.122524
C16orf46	139.861	-0.480301	0.272142	-1.76489	0.0775823	0.16807	0.0680612
C16orf52	372.394	-0.845544	0.19259	-4.39039	1.13e-05	0.000152387	6.17e-05
C16orf58	4333.84	0.0829278	0.175025	0.473804	0.63564	0.754918	0.30571
C16orf59	168.578	-2.12371	0.289446	-7.33718	2.18e-13	2.96e-11	1.2e-11
C16orf62	1676.24	0.108543	0.110413	0.983062	0.325577	0.484074	0.19603
C16orf70	1368.34	0.269807	0.128138	2.1056	0.035239	0.0932652	0.0377685
C16orf72	1804.72	0.393848	0.114819	3.43016	0.000603222	0.00379975	0.00153874
C16orf74	273.182	-0.871331	0.240079	-3.62935	0.000284134	0.0020745	0.000840087
C16orf87	504.363	0.589522	0.197861	2.97948	0.00288737	0.0132429	0.00536282
C16orf91	349.487	-0.233142	0.19385	-1.20269	0.229096	0.376638	0.152523
C16orf95	156.574	-0.370272	0.243422	-1.52111	0.128232	0.24526	0.09932
C17orf100	236.712	0.25815	0.253242	1.01938	0.308022	0.465143	0.188364
C17orf107	57.7525	-0.376957	0.443303	-0.850338	0.395137	0.552395	0.223697
C17orf49	1842.34	-0.732966	0.251362	-2.91597	0.0035458	0.0155474	0.00629603
C17orf51	2054.12	0.122477	0.117926	1.03859	0.298995	0.455908	0.184624
C17orf53	521.602	-0.371308	0.145105	-2.55889	0.0105006	0.0366353	0.0148358
C17orf58	757.008	-0.121403	0.128895	-0.941869	0.34626	0.504899	0.204463
C17orf59	511.121	1.0685	0.168343	6.34717	2.19e-10	1.5e-08	6.09e-09
C17orf62	1389.39	-0.10165	0.159496	-0.63732	0.523917	0.665721	0.269589
C17orf67	209.47	-0.258941	0.210637	-1.22932	0.218951	0.363553	0.147224
C17orf75	1246.79	0.256905	0.094339	2.72321	0.00646517	0.0252666	0.0102319
C17orf80	2176.74	0.0812654	0.0898599	0.904357	0.365806	0.523874	0.212147
C17orf85	4748.77	-0.120102	0.0904898	-1.32724	0.18443	0.32121	0.130076
C17orf89	884.825	-0.445567	0.201791	-2.20806	0.0272403	0.0767935	0.0310982
C17orf96	104.794	-0.39375	0.334113	-1.17849	0.238599	0.387335	0.156854
C17orf97	128.551	0.518502	0.195559	2.65139	0.00801622	0.02982	0.0120758
C18orf21	610.422	0.346862	0.227478	1.52481	0.127306	0.243875	0.098759
C18orf25	2379.68	0.0206016	0.157459	0.130838	0.895903	0.937133	0.3795
C18orf32	648.711	0.439891	0.247402	1.77805	0.0753964	0.164687	0.0666913
C18orf54	1519.58	-0.0845333	0.264447	-0.31966	0.749226	0.835386	0.338296
C18orf8	1284.54	0.649731	0.172165	3.77388	0.000160728	0.00130365	0.000527925
C19orf12	1699.75	-0.238217	0.106437	-2.23811	0.0252142	0.0724996	0.0293593
C19orf24	1596.6	0.18956	0.173816	1.09058	0.275457	0.430068	0.17416
C19orf25	729.262	-0.577645	0.159244	-3.62742	0.000286267	0.00208715	0.00084521
C19orf33	159.048	-0.794188	0.448355	-1.77134	0.0765044	0.166249	0.0673237
C19orf43	3999.11	-0.245189	0.170104	-1.44141	0.14947	0.275203	0.111446
C19orf44	554.878	0.249216	0.137524	1.81216	0.069962	0.15564	0.0630277
C19orf47	900.736	-0.355351	0.147521	-2.40882	0.0160042	0.0510708	0.0206815
C19orf48	7156.08	-0.265025	0.157402	-1.68374	0.0922311	0.191333	0.0774821
C19orf52	418.614	-0.0890969	0.18774	-0.474576	0.635089	0.754466	0.305527
C19orf53	3040.06	0.117699	0.178756	0.658435	0.510259	0.655555	0.265472
C19orf54	1046.69	0.643588	0.115193	5.58703	2.31e-08	8.33e-07	3.37e-07
C19orf57	66.6619	0.287723	0.433711	0.663397	0.507076	0.652742	0.264333
C19orf60	706.478	-0.499973	0.185919	-2.68919	0.0071625	0.0273788	0.0110873
C19orf66	941.731	0.513367	0.200165	2.56472	0.010326	0.0361491	0.0146389
C19orf68	1151.77	0.615013	0.179915	3.41836	0.000630005	0.00394015	0.0015956
C19orf70	2094.51	-0.251647	0.215355	-1.16852	0.242597	0.392103	0.158785
C19orf71	158.807	-0.0684117	0.279197	-0.24503	0.806433	0.875514	0.354546
C19orf73	79.1274	0.0023039	0.367642	0.00626671	0.995	0.996815	0.403669
C1D	587.904	0.252877	0.149215	1.69472	0.090129	0.187969	0.0761195
C1GALT1	1322.59	0.354511	0.174791	2.0282	0.0425402	0.107685	0.0436081
C1GALT1C1	1391.95	-0.266619	0.181422	-1.4696	0.141669	0.264345	0.107049
C1GALT1C1L	61.1961	-0.3214	0.271044	-1.18579	0.235706	0.384008	0.155507
C1orf109	2096.14	0.512561	0.111234	4.60797	4.07e-06	6.45e-05	2.61e-05
C1orf112	548.229	-0.958049	0.256362	-3.7371	0.000186153	0.00146609	0.000593706
C1orf122	976.127	-0.647969	0.189389	-3.42137	0.000623074	0.00390264	0.00158041
C1orf123	2111.86	0.299536	0.122559	2.44401	0.0145252	0.0472806	0.0191467
C1orf131	362.632	0.175436	0.170396	1.02958	0.303209	0.460959	0.186669
C1orf159	730.409	-0.560198	0.132934	-4.2141	2.51e-05	0.000290629	0.000117693
C1orf162	34.6934	0.764982	0.383949	1.99241	0.0463266	0.11459	0.046404
C1orf174	1750.46	-0.0832174	0.100421	-0.828688	0.407281	0.56409	0.228433
C1orf198	1617.63	0.397944	0.145602	2.73309	0.00627433	0.0247588	0.0100263
C1orf21	1095.88	-0.0829765	0.171633	-0.483453	0.628774	0.749721	0.303605
C1orf216	1412.94	-0.241117	0.1438	-1.67676	0.0935899	0.193622	0.0784087
C1orf226	144.012	0.536757	0.611642	0.877567	0.380179	0.538431	0.218042
C1orf228	49.4437	1.77666	0.474114	3.74732	0.000178731	0.00142147	0.000575635
C1orf233	178.946	-0.066493	0.356781	-0.186369	0.852155	0.9089	0.368066
C1orf27	1140.37	0.208245	0.176451	1.18018	0.237927	0.386667	0.156584
C1orf35	580.077	0.0412558	0.13574	0.303933	0.761179	0.844344	0.341924
C1orf43	12602.7	0.331427	0.102755	3.2254	0.00125798	0.00682024	0.00276191
C1orf50	452.923	0.528494	0.193494	2.73132	0.00630814	0.0248381	0.0100584
C1orf52	1095.69	0.122966	0.168359	0.730382	0.465157	0.616964	0.249845
C1orf53	90.2484	0.258915	0.253035	1.02324	0.306197	0.463513	0.187703
C1orf56	734.108	1.12444	0.207755	5.41233	6.22e-08	1.93e-06	7.82e-07
C1orf61	86.491	0.785705	0.442569	1.77533	0.0758436	0.165353	0.0669609
C1orf74	147.262	-0.154941	0.321956	-0.481248	0.63034	0.750863	0.304068
C1QBP	12839.3	-0.701406	0.131802	-5.32168	1.03e-07	2.97e-06	1.2e-06
C1QL1	453.34	-0.384845	0.265172	-1.4513	0.146696	0.271409	0.109909
C1QL4	241.18	0.401218	0.266255	1.50689	0.131838	0.250286	0.101356
C1QTNF2	97.461	-0.350083	0.659093	-0.53116	0.595308	0.723348	0.292926
C1QTNF6	217.982	-0.712661	0.240778	-2.95983	0.00307812	0.0139258	0.00563938
C1RL	98.7737	-0.101815	0.391641	-0.25997	0.794887	0.868049	0.351524
C20orf194	4008.59	0.200012	0.113596	1.76073	0.0782848	0.169206	0.0685213
C20orf196	327.749	0.866701	0.193962	4.4684	7.88e-06	0.000111825	4.53e-05
C20orf24	3290.78	-0.322546	0.165933	-1.94383	0.0519156	0.124684	0.0504917
C20orf27	6649.8	-0.361648	0.153989	-2.34854	0.0188474	0.0580155	0.0234939
C20orf96	1461.56	0.5353	0.20656	2.5915	0.00955576	0.0340437	0.0137863
C21orf2	667.297	0.367813	0.193277	1.90303	0.0570363	0.13356	0.0540861
C21orf33	1245.15	0.0846586	0.183541	0.461252	0.644617	0.761977	0.308569
C21orf58	794.661	-0.817119	0.253443	-3.22407	0.00126382	0.00683519	0.00276797
C21orf59	1671.92	-0.982056	0.179659	-5.46621	4.6e-08	1.49e-06	6.03e-07
C21orf91	958.607	0.71354	0.172427	4.13822	3.5e-05	0.000375231	0.000151953
C22orf23	1354.22	0.309769	0.150721	2.05524	0.0398557	0.102508	0.0415114
C22orf29	1370.13	0.11697	0.104439	1.11999	0.262719	0.415789	0.168377
C22orf34	701.504	0.243858	0.360402	0.676628	0.498642	0.645051	0.261219
C22orf39	1433.28	-0.31608	0.102315	-3.0893	0.00200629	0.00986834	0.00399626
C22orf46	511.755	-1.93973	0.17703	-10.9571	6.15e-28	1.36e-24	5.52e-25
C2CD2	6570.62	-0.1603	0.144124	-1.11224	0.266034	0.419688	0.169956
C2CD2L	1111.87	0.547135	0.227993	2.39979	0.0164046	0.0520615	0.0210827
C2CD3	4129.81	-0.289216	0.149646	-1.93267	0.0532772	0.126923	0.0513985
C2CD4C	493.454	-0.698642	0.226163	-3.08911	0.0020076	0.00987112	0.00399739
C2CD5	4772.72	0.146646	0.13484	1.08756	0.27679	0.431644	0.174798
C2orf16	49.8313	-0.0894217	0.451838	-0.197906	0.843118	0.9023	0.365394
C2orf42	479.908	0.585116	0.135917	4.30494	1.67e-05	0.000207503	8.4e-05
C2orf44	943.202	-0.284108	0.114884	-2.473	0.0133984	0.0444609	0.0180048
C2orf47	1134.87	-0.202922	0.154747	-1.31132	0.189751	0.3277	0.132705
C2orf48	55.7524	-0.551651	0.304597	-1.81109	0.0701276	0.155841	0.063109
C2orf49	1437.62	0.69675	0.151877	4.58761	4.48e-06	7e-05	2.84e-05
C2orf68	1300.62	-0.762707	0.23108	-3.30062	0.000964711	0.00554417	0.00224516
C2orf69	1716.82	0.673779	0.192472	3.50066	0.000464104	0.00308091	0.00124764
C2orf72	153.309	-0.343308	0.271628	-1.26389	0.206269	0.348494	0.141126
C2orf76	293.517	0.729255	0.151523	4.81282	1.49e-06	2.81e-05	1.14e-05
C2orf81	113.411	0.72281	0.22987	3.14443	0.00166408	0.0085484	0.00346174
C2orf82	30.8836	-0.741907	0.382768	-1.93827	0.0525906	0.12576	0.0509276
C2orf88	135.697	0.781765	0.282544	2.76688	0.00565963	0.0227789	0.00922449
C3	514.82	1.29417	0.382433	3.38406	0.000714228	0.00436472	0.00176753
C3orf14	516.252	0.0624231	0.166801	0.374237	0.708228	0.807549	0.327024
C3orf17	4635.08	0.45888	0.104828	4.37746	1.2e-05	0.000159654	6.47e-05
C3orf33	516.075	0.735033	0.272655	2.69584	0.00702118	0.0269236	0.0109029
C3orf38	959.798	0.642502	0.157779	4.07216	4.66e-05	0.000478006	0.000193573
C3orf52	399.37	-0.32416	0.208359	-1.55578	0.119761	0.232534	0.0941666
C3orf58	775.08	0.143756	0.19477	0.73808	0.460466	0.613296	0.248359
C3orf62	483.844	-0.647423	0.167868	-3.85675	0.000114906	0.000989904	0.00040087
C3orf67	138.146	1.08123	0.242966	4.45011	8.58e-06	0.000119997	4.86e-05
C4orf27	737.801	-1.42729	0.214685	-6.6483	2.97e-11	2.44e-09	9.89e-10
C4orf29	427.902	0.259957	0.190574	1.36407	0.172544	0.305638	0.123771
C4orf3	2627.55	-0.0388716	0.180444	-0.215422	0.829438	0.892545	0.361443
C4orf32	992.574	0.0716661	0.253209	0.283031	0.777153	0.855646	0.346501
C4orf33	274.946	0.348116	0.262988	1.32369	0.185605	0.32259	0.130635
C4orf46	1223.88	-0.333818	0.244948	-1.36281	0.172941	0.306217	0.124005
C4orf48	675.026	-0.383996	0.232342	-1.65272	0.0983876	0.200634	0.0812484
C5	80.5641	0.551402	0.654712	0.842204	0.399674	0.556449	0.225339
C5orf15	2766.87	0.0400669	0.172236	0.232628	0.81605	0.882413	0.35734
C5orf22	1329.04	-0.118186	0.174316	-0.677997	0.497773	0.644358	0.260938
C5orf24	5045.52	0.310746	0.179629	1.72993	0.0836429	0.177785	0.0719953
C5orf28	830.228	0.652814	0.221148	2.95193	0.00315797	0.0142098	0.00575437
C5orf30	939.564	-0.369538	0.149834	-2.46631	0.0136513	0.0450865	0.0182581
C5orf34	350.098	-0.119612	0.284387	-0.420595	0.674051	0.783	0.317082
C5orf42	3176.23	0.562289	0.184843	3.04198	0.00235028	0.0112002	0.00453562
C5orf45	270.426	0.194277	0.199568	0.973485	0.330312	0.488355	0.197763
C5orf51	3253.97	0.537905	0.197578	2.7225	0.00647909	0.0253042	0.0102471
C5orf56	53.4622	0.377263	0.423857	0.890072	0.373427	0.531585	0.21527
C5orf66	392.419	-0.473487	0.244524	-1.93636	0.0528234	0.126204	0.0511072
C6orf1	1073.09	-0.118889	0.131462	-0.904359	0.365805	0.523874	0.212147
C6orf106	3939.16	-0.246172	0.0982381	-2.50588	0.0122149	0.041369	0.0167527
C6orf120	2680.08	-0.598466	0.143128	-4.18134	2.9e-05	0.000326881	0.000132373
C6orf203	572.747	-0.507849	0.154256	-3.29224	0.000993915	0.00567525	0.00229824
C6orf226	60.7787	-0.74525	0.301998	-2.46773	0.0135973	0.0449726	0.018212
C6orf48	110.812	-0.0063843	0.389098	-0.0164079	0.986909	0.992403	0.401882
C6orf62	5869.83	0.276273	0.190566	1.44975	0.14713	0.271985	0.110143
C6orf89	4098.22	-0.0339243	0.13488	-0.251514	0.801416	0.872451	0.353306
C7orf13	319.094	0.324457	0.199044	1.63007	0.103086	0.20767	0.0840975
C7orf25	856.439	0.263744	0.14076	1.87372	0.0609695	0.140374	0.0568458
C7orf26	1076.37	0.154142	0.168693	0.913743	0.360852	0.519237	0.210269
C7orf31	157.851	0.505833	0.193878	2.60903	0.00908002	0.0326834	0.0132354
C7orf43	519.03	-0.925284	0.160949	-5.74894	8.98e-09	3.72e-07	1.51e-07
C7orf49	1261.78	-0.484008	0.14558	-3.32469	0.000885158	0.00519006	0.00210176
C7orf50	2240.71	-0.340066	0.224664	-1.51367	0.130111	0.247963	0.100415
C7orf55	977.786	-0.296494	0.25443	-1.16533	0.243887	0.393701	0.159433
C7orf60	566.5	0.494046	0.20201	2.44565	0.014459	0.0471483	0.0190931
C7orf61	38.4559	0.192939	0.335757	0.574641	0.565534	0.69982	0.283398
C7orf73	1811.22	-0.518012	0.164557	-3.14792	0.00164436	0.00847654	0.00343264
C8orf33	3876.94	-0.161868	0.148014	-1.0936	0.274131	0.428701	0.173606
C8orf37	1101.85	0.277929	0.169482	1.63987	0.101031	0.204459	0.0827975
C8orf44-SGK3	46.9061	1.92601	1.71634	1.12216	0.261792	0.414828	0.167988
C8orf44	178.17	0.137503	0.268848	0.511452	0.609035	0.734395	0.297399
C8orf46	37.9919	-0.0566883	0.474295	-0.119521	0.904862	0.943052	0.381897
C8orf48	162.722	0.496489	0.340945	1.45621	0.145333	0.269451	0.109116
C8orf58	908.101	-0.372973	0.191452	-1.94813	0.0513996	0.123936	0.050189
C8orf59	1356.54	-0.483606	0.161462	-2.99517	0.00274291	0.0126896	0.00513877
C8orf76	1091.54	0.122073	0.126075	0.968253	0.332918	0.491094	0.198872
C8orf82	1689.19	-0.793473	0.275743	-2.87758	0.00400734	0.0171725	0.00695413
C8orf88	679.22	-0.161692	0.184179	-0.877908	0.379994	0.538258	0.217972
C9orf114	1367.75	-0.413543	0.137942	-2.99795	0.00271799	0.0126006	0.00510273
C9orf116	126.158	1.06801	0.295929	3.60902	0.000307354	0.00220295	0.000892104
C9orf117	48.203	0.0219625	0.299685	0.0732852	0.941579	0.96522	0.390874
C9orf131	39.138	0.151957	0.436891	0.347813	0.72798	0.821276	0.332583
C9orf142	1521.63	-0.235208	0.126364	-1.86136	0.0626938	0.143205	0.057992
C9orf156	275.585	-0.106241	0.227399	-0.467203	0.640355	0.758218	0.307046
C9orf16	754.676	-0.351916	0.209329	-1.68117	0.0927306	0.19213	0.0778047
C9orf163	50.3658	0.180219	0.352973	0.510576	0.609648	0.734802	0.297564
C9orf172	126.107	0.0283167	0.279675	0.101249	0.919353	0.951819	0.385447
C9orf3	353.594	0.228588	0.213118	1.07259	0.283457	0.438393	0.177531
C9orf40	915.98	-0.383837	0.218059	-1.76025	0.0783658	0.169299	0.0685589
C9orf69	2309.07	0.135984	0.169681	0.801406	0.422897	0.57903	0.234483
C9orf72	1003.21	0.676071	0.25108	2.69265	0.00708869	0.0271512	0.0109951
C9orf78	1700.69	0.0812155	0.119021	0.682363	0.49501	0.641849	0.259922
C9orf84	284.515	-0.599363	0.316907	-1.89129	0.0585862	0.136183	0.0551484
C9orf85	237.933	-0.478386	0.152309	-3.14089	0.00168435	0.00862922	0.00349447
C9orf89	823.665	-0.00538947	0.20728	-0.0260009	0.979257	0.987866	0.400044
C9orf9	448.762	0.552942	0.175169	3.15662	0.0015961	0.00827583	0.00335136
C9orf91	1924.01	-0.120103	0.196372	-0.611612	0.540795	0.678223	0.274652
CA11	358.811	0.45396	0.319581	1.42048	0.155467	0.283375	0.114755
CA12	10263.4	-0.520414	0.233818	-2.22572	0.0260331	0.0741178	0.0300146
CA13	198.062	-0.209644	0.296075	-0.708075	0.478899	0.628614	0.254562
CA2	204.44	0.544115	0.312085	1.74348	0.0812491	0.173779	0.0703732
CA5B	794.528	0.494741	0.182828	2.70605	0.00680887	0.0262913	0.0106469
CA5BP1	322.782	0.120717	0.187127	0.645111	0.518856	0.661618	0.267928
CA7	31.4587	-0.313523	0.440137	-0.712331	0.47626	0.626695	0.253785
CA9	41.3603	1.33941	1.15738	1.15728	0.247158	0.397352	0.160911
CAAP1	1329.42	-0.191244	0.172564	-1.10825	0.267754	0.421253	0.17059
CAB39	2978.98	0.298342	0.120727	2.47122	0.0134654	0.0446053	0.0180633
CAB39L	901.985	0.243695	0.181635	1.34168	0.179701	0.315128	0.127614
CABIN1	5796.01	-0.119124	0.0687515	-1.73267	0.0831545	0.176916	0.0716436
CABLES1	672.413	0.0472097	0.257798	0.183126	0.854699	0.910593	0.368752
CABLES2	1115.53	-0.00159557	0.155893	-0.010235	0.991834	0.995271	0.403043
CABYR	262.982	-0.0520179	0.272388	-0.19097	0.848549	0.906145	0.366951
CACFD1	305.087	0.537146	0.162727	3.3009	0.000963766	0.00554123	0.00224397
CACHD1	755.343	-0.204129	0.170015	-1.20065	0.229887	0.377565	0.152898
CACNA1A	2266.49	0.376192	0.269674	1.39499	0.163019	0.293413	0.11882
CACNA1G	189.233	0.924673	0.43016	2.1496	0.0315866	0.08585	0.0347657
CACNA1H	1201.06	0.701741	0.411388	1.70579	0.0880478	0.184637	0.0747704
CACNA2D1	3120.57	0.466414	0.177905	2.6217	0.00874917	0.0318434	0.0128953
CACNA2D2	72.1343	0.757813	0.470807	1.6096	0.107484	0.214201	0.0867426
CACNB1	574.34	0.531631	0.121445	4.37753	1.2e-05	0.000159654	6.47e-05
CACNB3	1024.65	-0.351846	0.151369	-2.32442	0.0201028	0.061047	0.0247215
CACNB4	563.225	1.19731	0.262977	4.5529	5.29e-06	8e-05	3.24e-05
CACNG4	269.041	-0.609363	0.423841	-1.43772	0.150514	0.276438	0.111946
CACNG8	2125.18	-0.248965	0.232584	-1.07043	0.284426	0.439394	0.177936
CACTIN-AS1	46.0636	0.259833	0.296608	0.876016	0.381021	0.538822	0.2182
CACTIN	2698.46	-0.0710329	0.158616	-0.447829	0.654277	0.769615	0.311662
CACUL1	4543.6	0.188103	0.208934	0.900297	0.367962	0.526112	0.213053
CACYBP	4934.09	-0.480762	0.132147	-3.6381	0.000274661	0.00201863	0.000817461
CAD	13134.6	-0.0307103	0.101885	-0.30142	0.763094	0.84506	0.342214
CADM1	292.01	1.58904	0.65725	2.41771	0.0156186	0.050124	0.0202981
CADM2	59.1043	0.0103668	0.504827	0.0205353	0.983616	0.99052	0.401119
CADM3	33.9063	0.663868	0.794669	0.835402	0.403491	0.560182	0.22685
CADM4	790.59	0.28741	0.163072	1.76247	0.0779891	0.168741	0.068333
CADPS2	677.176	-0.0896376	0.155354	-0.57699	0.563946	0.698639	0.28292
CAHM	47.3905	-0.556558	0.370691	-1.50141	0.13325	0.252105	0.102092
CALB2	1171.95	0.255675	0.476815	0.536215	0.59181	0.720742	0.291871
CALCOCO1	2264.67	0.458704	0.151864	3.02049	0.00252363	0.0118917	0.00481563
CALCOCO2	3384.86	0.304974	0.10502	2.90397	0.00368463	0.0160532	0.00650086
CALD1	11357.1	-0.103157	0.487785	-0.211481	0.832512	0.895199	0.362518
CALHM2	78.1263	-1.08641	0.304578	-3.56694	0.00036117	0.00250113	0.00101286
CALM1	11285	-0.719963	0.12348	-5.83061	5.52e-09	2.42e-07	9.79e-08
CALM2	11943.2	-0.316421	0.169521	-1.86656	0.0619632	0.142128	0.0575558
CALM3	20282.9	-0.653685	0.142569	-4.58504	4.54e-06	7.08e-05	2.87e-05
CALML4	902.546	-0.485415	0.245349	-1.97846	0.0478763	0.117354	0.0475235
CALR	53715.4	0.621743	0.190351	3.26629	0.00108968	0.00608884	0.00246573
CALU	16321.7	0.442904	0.154191	2.87243	0.00407323	0.0173989	0.00704583
CAMK1D	2388.86	-0.209533	0.205703	-1.01862	0.308384	0.465478	0.188499
CAMK2D	5271.17	0.878116	0.144369	6.08242	1.18e-09	6.43e-08	2.6e-08
CAMK2G	3454.77	0.0348892	0.133318	0.261698	0.793554	0.867258	0.351203
CAMK2N1	2391.96	0.0512756	0.127723	0.401461	0.688081	0.793273	0.321242
CAMK2N2	481.972	-0.966184	0.298109	-3.24104	0.00119093	0.00654741	0.00265143
CAMK4	297.423	0.823887	0.407955	2.01956	0.0434294	0.10923	0.0442336
CAMKK1	982.947	0.798803	0.153961	5.18835	2.12e-07	5.49e-06	2.22e-06
CAMKK2	3160.83	-0.253788	0.0926892	-2.73805	0.00618041	0.0244243	0.00989084
CAMKMT	190.848	-0.0827726	0.222123	-0.372643	0.709414	0.808485	0.327403
CAMLG	3901.96	0.588916	0.133771	4.40241	1.07e-05	0.000144955	5.87e-05
CAMSAP1	8441.85	0.282583	0.170676	1.65567	0.097788	0.199852	0.0809318
CAMSAP2	3095.62	0.606028	0.170712	3.55001	0.000385221	0.00262986	0.00106498
CAMSAP3	242.737	1.66893	0.517742	3.22348	0.00126644	0.00684384	0.00277147
CAMTA1	1434.88	0.00856561	0.144949	0.059094	0.952877	0.971803	0.39354
CAMTA2	4065.39	0.363085	0.0918988	3.95093	7.78e-05	0.0007251	0.000293635
CAND1	8794.01	0.0890662	0.111541	0.798503	0.424578	0.580676	0.23515
CANT1	5198.18	-0.224649	0.0786683	-2.85564	0.00429498	0.0181653	0.00735618
CANX	70389.4	0.35999	0.109453	3.28899	0.00100548	0.00573144	0.00232099
CAP1	18863.6	-0.314021	0.128521	-2.44334	0.0145518	0.0473557	0.0191771
CAP2	3546.16	-0.341654	0.146702	-2.3289	0.0198643	0.0605021	0.0245008
CAPG	4409.96	-0.373432	0.166109	-2.24811	0.024569	0.0711053	0.0287947
CAPN1	7220.29	-0.0508305	0.114988	-0.442051	0.658452	0.772499	0.31283
CAPN10-AS1	143.888	-0.311067	0.237816	-1.30802	0.190868	0.328818	0.133157
CAPN10	711.606	-0.124143	0.10994	-1.12919	0.258819	0.410955	0.166419
CAPN15	3666.72	-0.204733	0.103584	-1.9765	0.0480985	0.117747	0.0476827
CAPN2	19024.5	-0.0813826	0.144282	-0.564053	0.572718	0.705626	0.285749
CAPN3	36.2207	1.59334	0.423693	3.76061	0.0001695	0.00136399	0.00055236
CAPN5	1351.65	0.181071	0.213759	0.847077	0.396952	0.553935	0.224321
CAPN7	3682.91	0.590206	0.145483	4.05686	4.97e-05	0.000503904	0.00020406
CAPNS1	12591.5	-0.360071	0.126475	-2.84698	0.00441368	0.0185612	0.00751649
CAPRIN1	21711.1	0.056008	0.110159	0.50843	0.611152	0.735815	0.297974
CAPRIN2	5246.28	0.668486	0.218392	3.06095	0.00220635	0.0106632	0.00431816
CAPS	104.677	0.612945	0.313564	1.95477	0.0506107	0.122383	0.04956
CAPS2	291.054	0.147717	0.231823	0.637197	0.523997	0.66575	0.269601
CAPZA1	9991.2	-0.303992	0.169613	-1.79227	0.0730899	0.160853	0.0651388
CAPZA2	5775.41	0.205923	0.122829	1.6765	0.0936396	0.193622	0.0784087
CAPZB	11208	0.170568	0.116201	1.46786	0.142141	0.264935	0.107288
CARD10	2403.35	-0.341106	0.16329	-2.08896	0.0367117	0.0962064	0.0389596
CARD14	99.2583	-0.086557	0.32005	-0.270449	0.786815	0.863	0.349479
CARD6	88.0914	0.332801	0.598904	0.555684	0.578427	0.710031	0.287533
CARD8-AS1	118.708	-0.280894	0.331288	-0.847885	0.396502	0.553539	0.22416
CARD8	1259.14	-0.569205	0.22785	-2.49816	0.0124841	0.0421615	0.0170736
CARF	251.005	0.576293	0.230852	2.49637	0.012547	0.0423108	0.0171341
CARHSP1	1486.52	-0.383534	0.172554	-2.22269	0.0262367	0.0745857	0.0302041
CARKD	2478.7	-0.0418919	0.15984	-0.262086	0.793255	0.867134	0.351153
CARM1	4678.59	-0.100625	0.112076	-0.897825	0.369279	0.527484	0.213609
CARNMT1	1208.58	0.194743	0.176363	1.10422	0.269499	0.423199	0.171378
CARNS1	29.8496	1.89052	0.636212	2.97153	0.00296323	0.0135302	0.00547917
CARS	1297.83	-0.389215	0.253201	-1.53718	0.12425	0.239018	0.0967922
CARS2	3814.2	-0.254247	0.231964	-1.09606	0.273052	0.427315	0.173045
CASC10	146.691	0.383306	0.277536	1.3811	0.167247	0.299195	0.121162
CASC2	88.2338	-0.0800062	0.358083	-0.223429	0.823201	0.888342	0.359741
CASC3	6296.24	0.259689	0.109226	2.37755	0.0174282	0.0545682	0.0220979
CASC4	3528.48	0.190209	0.109319	1.73995	0.0818673	0.174675	0.0707362
CASC5	3079.79	-0.499922	0.262439	-1.9049	0.0567926	0.133106	0.0539024
CASC9	129.749	1.84471	0.534231	3.45302	0.000554339	0.00354793	0.00143676
CASD1	1432.82	0.0911711	0.169092	0.539182	0.589761	0.719432	0.29134
CASK	1622.66	-0.0990396	0.0895627	-1.10581	0.268807	0.422611	0.17114
CASKIN1	445.515	0.724894	0.273478	2.65064	0.00803386	0.0298526	0.012089
CASKIN2	1165.98	-0.321851	0.102625	-3.13617	0.00171171	0.00872905	0.0035349
CASP1	47.3084	-0.614232	0.632504	-0.971111	0.331493	0.489697	0.198307
CASP2	1633.47	-0.178997	0.201177	-0.889747	0.373602	0.531737	0.215331
CASP3	1333.22	-0.0480103	0.157288	-0.305238	0.760185	0.843664	0.341649
CASP4	1227.94	-0.377272	0.325682	-1.15841	0.246698	0.397016	0.160775
CASP6	423.066	0.0724706	0.191865	0.377716	0.705641	0.805842	0.326332
CASP7	563.093	0.0828662	0.187355	0.442296	0.658275	0.772359	0.312773
CASP8	1508.71	0.0475503	0.150514	0.315919	0.752064	0.837584	0.339187
CASP8AP2	2039.77	-0.376526	0.161195	-2.33585	0.0194992	0.0596221	0.0241444
CASP9	534.152	-0.11401	0.199193	-0.572361	0.567078	0.700948	0.283854
CAST	16185	-0.0510577	0.155792	-0.327731	0.743115	0.831444	0.3367
CASZ1	1973.26	-0.770352	0.195067	-3.94918	7.84e-05	0.000728896	0.000295173
CAT	1858.94	-0.296665	0.181388	-1.63553	0.101938	0.205888	0.0833759
CATSPER1	92.8194	-0.293062	0.460855	-0.635908	0.524836	0.666117	0.26975
CATSPER2	74.5327	1.02263	0.265819	3.84709	0.000119529	0.00102575	0.000415385
CATSPER2P1	75.3978	1.07735	0.375542	2.8688	0.00412036	0.0175713	0.00711564
CATSPER3	97.3617	-0.00906758	0.311127	-0.0291443	0.97675	0.986234	0.399384
CATSPERG	37.1922	0.750355	0.435576	1.72267	0.0849477	0.179811	0.072816
CAV1	10477.5	-0.195517	0.222653	-0.878124	0.379877	0.538224	0.217958
CAV2	3129.94	0.336435	0.24399	1.37889	0.167929	0.300099	0.121528
CBARP	475.741	0.515632	0.205178	2.51309	0.0119678	0.0406979	0.016481
CBFA2T2	2402.3	0.498037	0.173928	2.86347	0.00419024	0.0177788	0.00719967
CBFA2T3	435.262	0.672531	0.281128	2.39226	0.016745	0.0528513	0.0214026
CBFB	3307.88	0.0101325	0.161014	0.0629291	0.949823	0.969787	0.392723
CBL	9627.12	0.379054	0.182527	2.0767	0.037829	0.0983761	0.0398382
CBLB	457.926	0.957146	0.246815	3.87799	0.000105323	0.000920451	0.000372744
CBLL1	2308.03	0.49326	0.15737	3.13439	0.00172211	0.00876531	0.00354958
CBR1	2001.5	-0.23725	0.163157	-1.45412	0.145914	0.270338	0.109476
CBR3-AS1	36.1207	1.16035	0.510984	2.27082	0.0231578	0.0680271	0.0275481
CBR3	271.746	-0.296476	0.185018	-1.60242	0.109063	0.216597	0.0877125
CBR4	473.477	-0.0642673	0.221714	-0.289865	0.771919	0.851786	0.344938
CBS	1529.04	-0.0249086	0.262115	-0.095029	0.924292	0.955185	0.38681
CBWD1	1337.82	-0.0198136	0.155593	-0.127343	0.898669	0.938655	0.380116
CBWD2	790.612	0.0549103	0.171662	0.319874	0.749064	0.835386	0.338296
CBWD3	102.021	0.134472	0.368001	0.365412	0.714804	0.811848	0.328765
CBWD5	588.98	0.0155006	0.185983	0.0833445	0.933578	0.960272	0.38887
CBWD6	221.406	0.231623	0.245554	0.943271	0.345543	0.50433	0.204233
CBX1	4802.98	-0.298669	0.113375	-2.63434	0.00843018	0.0308851	0.0125072
CBX2	1292.67	-0.1634	0.116197	-1.40623	0.159657	0.288532	0.116843
CBX3	5146.34	-0.0902357	0.127553	-0.707435	0.479296	0.628959	0.254702
CBX4	1580.21	0.121677	0.0985976	1.23408	0.217174	0.361549	0.146412
CBX5	16173.6	0.102792	0.220437	0.466311	0.640993	0.758636	0.307216
CBX6	8248.1	-0.14237	0.100663	-1.41432	0.157267	0.285531	0.115628
CBX7	1276.89	0.389453	0.183473	2.12267	0.0337814	0.0902511	0.0365479
CBX8	379.962	0.0706625	0.141658	0.498824	0.617904	0.741328	0.300207
CBY1	1079.13	-0.169381	0.115512	-1.46634	0.142555	0.265548	0.107536
CC2D1A	2976.2	0.367524	0.137733	2.66838	0.00762182	0.0286572	0.011605
CC2D1B	3458.59	-0.043122	0.0970225	-0.444453	0.656715	0.771617	0.312473
CC2D2A	1398.92	0.128008	0.146713	0.872508	0.382931	0.540718	0.218968
CCAR1	6148.83	-0.160377	0.135117	-1.18695	0.235247	0.383577	0.155333
CCAR2	6961.77	-0.131602	0.14941	-0.880814	0.378418	0.537024	0.217472
CCBE1	95.3634	1.50074	0.623055	2.40868	0.0160102	0.0510777	0.0206843
CCBL1	350.829	-0.926278	0.239611	-3.86576	0.000110745	0.000960899	0.000389124
CCBL2	1167.57	0.318003	0.139065	2.28673	0.0222119	0.0658293	0.0266581
CCDC101	567.827	0.393652	0.193454	2.03486	0.0418648	0.106401	0.0430878
CCDC102A	1392.74	0.617543	0.196361	3.14493	0.00166124	0.00853713	0.00345718
CCDC102B	48.7785	0.235691	0.525926	0.448145	0.654048	0.769503	0.311616
CCDC103	60.2476	0.597306	0.311302	1.91874	0.0550178	0.129902	0.0526049
CCDC106	968.536	-0.0319301	0.136252	-0.234346	0.814717	0.881616	0.357018
CCDC107	927.673	0.452486	0.217257	2.08272	0.0372767	0.0973229	0.0394117
CCDC109B	1232.91	-0.684547	0.24334	-2.81313	0.0049062	0.0202297	0.00819219
CCDC112	1112.87	0.990984	0.190222	5.20961	1.89e-07	4.99e-06	2.02e-06
CCDC113	549.07	1.92828	0.267552	7.20713	5.71e-13	7.24e-11	2.93e-11
CCDC115	904.576	0.68004	0.140909	4.82611	1.39e-06	2.65e-05	1.08e-05
CCDC117	1657.59	0.102959	0.190711	0.539869	0.589287	0.719315	0.291293
CCDC12	894.331	-0.254956	0.177842	-1.43361	0.151684	0.278126	0.11263
CCDC121	123.803	-0.240675	0.218749	-1.10024	0.271229	0.425114	0.172153
CCDC122	548.766	1.00879	0.287241	3.51201	0.000444733	0.00297158	0.00120337
CCDC124	4531.02	-0.352253	0.164823	-2.13716	0.0325848	0.0877587	0.0355386
CCDC125	44.4399	0.375701	0.418099	0.898592	0.36887	0.527013	0.213418
CCDC126	205.688	0.318888	0.229939	1.38684	0.165491	0.296698	0.12015
CCDC127	809.028	0.125172	0.143169	0.874295	0.381958	0.53963	0.218528
CCDC130	1303.53	1.01665	0.180105	5.64473	1.65e-08	6.24e-07	2.53e-07
CCDC134	174.235	-1.33758	0.301279	-4.43969	9.01e-06	0.000124613	5.05e-05
CCDC136	109.751	1.16494	0.352579	3.30405	0.000952983	0.00549338	0.00222459
CCDC137	1510.57	-0.534217	0.124086	-4.30521	1.67e-05	0.000207503	8.4e-05
CCDC138	467.189	0.112768	0.194933	0.578497	0.562928	0.697763	0.282565
CCDC14	1427.13	-2.69183	0.270307	-9.95844	2.32e-23	3.43e-20	1.39e-20
CCDC142	366.118	-0.377879	0.203209	-1.85956	0.0629482	0.143663	0.0581774
CCDC144B	632.004	0.225311	0.220711	1.02084	0.30733	0.464626	0.188154
CCDC144CP	121.518	0.388858	0.307468	1.26471	0.205975	0.348131	0.140979
CCDC146	57.2065	0.446072	0.553142	0.806433	0.419993	0.5763	0.233377
CCDC149	486.554	1.21405	0.253024	4.79816	1.6e-06	2.98e-05	1.21e-05
CCDC15	375.356	-0.692622	0.270324	-2.56219	0.0104013	0.0363745	0.0147301
CCDC150	586.417	-0.0444839	0.257676	-0.172635	0.862938	0.91604	0.370958
CCDC151	42.6309	0.727091	0.44564	1.63157	0.102771	0.207191	0.0839038
CCDC154	40.2456	0.996395	0.421876	2.36182	0.0181856	0.0564397	0.0228557
CCDC157	66.9335	0.314327	0.394216	0.797345	0.425251	0.581356	0.235425
CCDC159	66.0363	0.750579	0.320224	2.34392	0.0190822	0.0585352	0.0237043
CCDC163P	214.91	0.596714	0.263694	2.2629	0.0236418	0.0690828	0.0279757
CCDC167	692.452	-0.680329	0.133528	-5.09504	3.49e-07	8.47e-06	3.43e-06
CCDC169-SOHLH2	146.922	1.33264	1.29693	1.02753	0.304169	0.461683	0.186962
CCDC169	107.216	0.123	0.365007	0.33698	0.736132	0.82648	0.33469
CCDC17	71.0157	-0.454502	0.396086	-1.14749	0.251181	0.402265	0.1629
CCDC171	404.737	0.844413	0.246345	3.42777	0.00060857	0.0038262	0.00154945
CCDC174	1461.34	0.918291	0.167955	5.46749	4.56e-08	1.48e-06	6.01e-07
CCDC176	282.502	0.716228	0.232789	3.07673	0.00209284	0.0102305	0.00414291
CCDC18	1504.59	-0.6462	0.37915	-1.70434	0.0883179	0.185032	0.0749302
CCDC181	270.907	1.4301	0.426688	3.35162	0.000803402	0.0048024	0.00194477
CCDC183-AS1	38.6895	-0.00838374	0.367576	-0.0228082	0.981803	0.989535	0.40072
CCDC183	70.0339	0.625991	0.370621	1.68903	0.0912136	0.189785	0.0768549
CCDC186	1141.37	0.748879	0.241734	3.09794	0.00194868	0.00963839	0.00390314
CCDC22	629.199	-0.189828	0.170759	-1.11167	0.26628	0.419877	0.170033
CCDC24	364.964	0.0670897	0.194166	0.345527	0.729698	0.822308	0.333001
CCDC25	2711.36	-0.139439	0.159284	-0.875416	0.381348	0.539099	0.218312
CCDC28A	650.21	-0.0846437	0.237894	-0.355804	0.721988	0.816523	0.330657
CCDC28B	178.796	-0.159967	0.238083	-0.671898	0.501649	0.648184	0.262488
CCDC3	190.095	0.964717	0.367364	2.62605	0.00863814	0.0315169	0.012763
CCDC30	71.202	3.62816	0.759384	4.77777	1.77e-06	3.23e-05	1.31e-05
CCDC34	861.208	-0.172633	0.182857	-0.94409	0.345124	0.50396	0.204083
CCDC39	57.4684	0.116129	0.435951	0.266381	0.789946	0.864893	0.350245
CCDC40	170.733	0.326935	0.35426	0.922867	0.356076	0.514939	0.208529
CCDC43	1449.33	0.313208	0.116904	2.67918	0.00738035	0.028032	0.0113518
CCDC47	7909.34	0.13332	0.0792351	1.68259	0.0924543	0.191647	0.0776091
CCDC50	7229.25	-0.0155617	0.135132	-0.11516	0.908319	0.945309	0.382811
CCDC51	555.932	-0.745931	0.193326	-3.85841	0.000114129	0.000984482	0.000398674
CCDC53	361.214	-0.172863	0.195361	-0.884839	0.376244	0.534768	0.216559
CCDC57	805.245	-0.300946	0.198534	-1.51585	0.129558	0.247193	0.100103
CCDC58	1029.45	-0.560521	0.168499	-3.32654	0.000879307	0.00516258	0.00209063
CCDC59	1444.01	0.428411	0.11706	3.65977	0.000252442	0.00189093	0.000765746
CCDC6	6800.37	0.251795	0.124553	2.0216	0.0432179	0.108842	0.0440765
CCDC61	802.36	-0.153475	0.153553	-0.999488	0.317559	0.474857	0.192297
CCDC62	80.6031	0.55468	0.380264	1.45867	0.144656	0.268531	0.108744
CCDC65	56.8802	-0.275327	0.285383	-0.964764	0.334663	0.49274	0.199539
CCDC66	835.68	-0.306013	0.156811	-1.95148	0.0509999	0.123196	0.0498891
CCDC69	89.3253	-0.248557	0.320764	-0.774891	0.438404	0.593487	0.240337
CCDC7	217.537	0.214067	0.227538	0.940798	0.346808	0.505509	0.20471
CCDC71	929.292	-0.487284	0.16002	-3.04515	0.00232567	0.0111072	0.00449797
CCDC71L	1043.25	0.174481	0.167741	1.04018	0.298256	0.455329	0.184389
CCDC73	38.3628	-0.350789	0.384849	-0.911498	0.362033	0.520374	0.21073
CCDC74A	760.444	0.0291323	0.179173	0.162593	0.870839	0.921372	0.373117
CCDC74B	262.977	0.257498	0.260596	0.988111	0.323098	0.481356	0.194929
CCDC77	921.19	-0.672955	0.269389	-2.49808	0.0124869	0.0421615	0.0170736
CCDC78	125.342	-0.740856	0.369766	-2.00358	0.0451151	0.112366	0.0455033
CCDC80	1031.11	-0.516451	0.412759	-1.25122	0.210855	0.353997	0.143354
CCDC82	1107.7	-0.00193909	0.231458	-0.00837774	0.993316	0.99571	0.403221
CCDC84	586.774	-0.692492	0.23288	-2.9736	0.00294327	0.0134622	0.00545161
CCDC85A	8.77578	-2.04047	1.06279	-1.91992	0.0548677	0.129737	0.052538
CCDC85B	8058.95	-0.10223	0.242142	-0.422192	0.672885	0.782238	0.316774
CCDC85C	3233.95	0.2234	0.141118	1.58307	0.113405	0.223095	0.0903442
CCDC86	6816.16	0.12638	0.114461	1.10414	0.269534	0.423204	0.17138
CCDC88A	8878.89	-0.0776993	0.17843	-0.435462	0.663227	0.775501	0.314045
CCDC88B	304.869	-0.188756	0.276495	-0.682675	0.494812	0.641667	0.259848
CCDC88C	3775.73	0.568128	0.219659	2.58642	0.009698	0.0344306	0.013943
CCDC9	2022.74	0.498999	0.241307	2.0679	0.0386494	0.100059	0.0405196
CCDC90B	2201.38	0.164202	0.19442	0.844577	0.398347	0.555027	0.224763
CCDC91	1871.15	0.318115	0.163469	1.94602	0.0516522	0.124298	0.0503354
CCDC92	215.596	-0.186668	0.301986	-0.618134	0.536487	0.674696	0.273224
CCDC93	3270.42	0.0921794	0.140925	0.654104	0.513045	0.657927	0.266433
CCDC94	1256.19	0.210471	0.19381	1.08597	0.277494	0.432335	0.175078
CCDC97	1764.05	-0.109447	0.0950685	-1.15125	0.249631	0.400505	0.162188
CCHCR1	923.425	0.342863	0.224686	1.52597	0.127018	0.243358	0.0985499
CCHE1	32.4138	1.02589	0.51504	1.99187	0.0463857	0.114693	0.046446
CCL2	647.482	-1.21969	0.788922	-1.54603	0.122098	0.236073	0.0955997
CCM2	1457.44	-0.128935	0.112145	-1.14972	0.250261	0.401274	0.162499
CCNA1	485.198	1.63457	0.33308	4.90745	9.23e-07	1.9e-05	7.7e-06
CCNA2	3321.22	-0.481858	0.248336	-1.94035	0.052337	0.125311	0.0507458
CCNB1	5008.51	-0.413485	0.183092	-2.25834	0.0239242	0.0696785	0.0282169
CCNB1IP1	2882.74	0.377443	0.165478	2.28093	0.0225527	0.0666172	0.0269772
CCNB2	4635.73	-0.334558	0.156048	-2.14395	0.032037	0.0867045	0.0351117
CCNB3	147.368	1.55558	0.270607	5.74848	9.01e-09	3.72e-07	1.51e-07
CCNC	3471.44	-0.067452	0.114585	-0.588664	0.556087	0.69173	0.280122
CCND1	24466.9	-0.224307	0.169852	-1.3206	0.186635	0.32362	0.131053
CCND2	9157.67	-0.296774	0.1688	-1.75815	0.0787228	0.169822	0.0687708
CCND3	625.662	-1.01555	0.20112	-5.0495	4.43e-07	1.03e-05	4.17e-06
CCNDBP1	769.432	-0.201118	0.179529	-1.12025	0.262606	0.41571	0.168345
CCNE1	887.427	-0.177475	0.158069	-1.12277	0.261535	0.414655	0.167918
CCNE2	786.991	-1.00078	0.517066	-1.93549	0.0529302	0.126391	0.0511829
CCNF	1297.86	-0.579076	0.233364	-2.48142	0.0130859	0.0437071	0.0176995
CCNG1	10048.7	0.566997	0.136271	4.1608	3.17e-05	0.000348555	0.00014115
CCNG2	731.569	1.33738	0.213522	6.26345	3.77e-10	2.33e-08	9.45e-09
CCNH	1748.46	-0.00728945	0.105839	-0.0688727	0.945091	0.966884	0.391548
CCNI	8531.34	0.0954594	0.0735226	1.29837	0.194161	0.33281	0.134774
CCNJ	1082.17	0.276975	0.141321	1.9599	0.050008	0.121372	0.0491507
CCNJL	479.649	0.0871659	0.266175	0.327476	0.743308	0.831499	0.336722
CCNK	4685.18	0.220301	0.10267	2.14572	0.031895	0.0863905	0.0349845
CCNL1	3978.42	0.107763	0.192813	0.558897	0.576232	0.70812	0.286759
CCNL2	4230.74	0.0727591	0.168146	0.432713	0.665223	0.776541	0.314467
CCNO	115.98	-0.23622	0.298026	-0.792615	0.428002	0.58362	0.236342
CCNT1	4808.11	0.183463	0.131814	1.39183	0.163974	0.294813	0.119387
CCNT2	1882.78	0.461331	0.195609	2.35843	0.0183522	0.0568065	0.0230043
CCNY	4041.21	-0.35471	0.0778255	-4.55776	5.17e-06	7.86e-05	3.18e-05
CCNYL1	1166.23	-0.0626475	0.166513	-0.376231	0.706745	0.806554	0.326621
CCNYL2	230.017	0.475245	0.324577	1.4642	0.14314	0.266386	0.107875
CCP110	1672.74	0.0605093	0.159418	0.379563	0.70427	0.804828	0.325922
CCPG1	3036.76	1.06482	0.209617	5.07983	3.78e-07	9.03e-06	3.66e-06
CCR10	61.8014	0.507178	0.379398	1.3368	0.18129	0.31712	0.12842
CCS	918.637	0.261588	0.128791	2.0311	0.0422448	0.107141	0.0433878
CCSAP	1037.17	0.878583	0.187163	4.69421	2.68e-06	4.56e-05	1.84e-05
CCSER2	8440.86	0.74729	0.158169	4.72462	2.31e-06	4.02e-05	1.63e-05
CCT2	15114.1	-0.419433	0.0896098	-4.68066	2.86e-06	4.81e-05	1.95e-05
CCT3	20724.4	-0.34942	0.0966931	-3.61371	0.00030185	0.00217522	0.000880872
CCT4	21904.8	-0.189498	0.0773657	-2.44938	0.01431	0.0467633	0.0189372
CCT5	21016.6	-0.397685	0.141056	-2.81934	0.0048122	0.0199348	0.00807274
CCT6A	15993.6	-0.30608	0.0862198	-3.55	0.000385234	0.00262986	0.00106498
CCT6P1	331.068	0.48426	0.183864	2.6338	0.00844355	0.0309256	0.0125236
CCT6P3	148.342	0.898888	0.298146	3.01492	0.00257047	0.0120422	0.00487658
CCT7	18656.4	-0.321428	0.0973553	-3.3016	0.000961346	0.00553439	0.0022412
CCT8	14652.6	-0.158295	0.097892	-1.61704	0.105869	0.21179	0.0857661
CCZ1	756.441	-0.80691	0.161539	-4.99514	5.88e-07	1.31e-05	5.29e-06
CCZ1B	441.312	-0.332401	0.14836	-2.2405	0.0250583	0.0721763	0.0292284
CD109	9897.5	0.363923	0.204565	1.77901	0.0752383	0.16441	0.0665792
CD151	7556.71	-0.734819	0.141906	-5.17822	2.24e-07	5.76e-06	2.33e-06
CD163L1	1968.94	-0.189723	0.254841	-0.744478	0.456587	0.610158	0.247089
CD164	10299.2	0.379528	0.16135	2.35221	0.0186623	0.0575655	0.0233116
CD24	893.177	0.428904	0.732013	0.585924	0.557927	0.693242	0.280734
CD27-AS1	230.614	0.762485	0.292293	2.60864	0.00909039	0.0327056	0.0132444
CD274	270.869	-0.87925	0.634637	-1.38544	0.165919	0.297305	0.120396
CD276	1642.24	-0.339659	0.168702	-2.01337	0.044076	0.110351	0.0446876
CD2AP	3798.56	0.386265	0.182628	2.11504	0.0344263	0.0916246	0.0371041
CD2BP2	1786.08	-0.713622	0.135264	-5.27576	1.32e-07	3.61e-06	1.46e-06
CD302	448.998	0.565797	0.629472	0.898843	0.368736	0.526936	0.213387
CD320	3905.93	-0.216313	0.13262	-1.63108	0.102874	0.207369	0.0839757
CD37	44.3202	-0.655199	0.367086	-1.78487	0.0742831	0.162831	0.0659396
CD3EAP	1538.03	0.368198	0.165351	2.22677	0.0259627	0.0739647	0.0299526
CD40	1403.86	0.244461	0.197014	1.24083	0.214668	0.358813	0.145304
CD44	52785.8	0.100893	0.163348	0.617655	0.536803	0.674742	0.273242
CD46	2318.74	0.1736	0.184422	0.941321	0.346541	0.505231	0.204597
CD47	4074.24	-0.00181828	0.229009	-0.00793974	0.993665	0.995985	0.403332
CD55	2312.45	1.26159	0.235551	5.35589	8.51e-08	2.53e-06	1.02e-06
CD58	448.885	-0.27275	0.166118	-1.6419	0.100611	0.203794	0.0825279
CD59	21032.8	-0.222322	0.197974	-1.12299	0.261444	0.41456	0.16788
CD63	11529.2	-0.168007	0.145507	-1.15463	0.248242	0.39871	0.161461
CD68	7270.2	1.29401	0.143661	9.00735	2.11e-19	1e-16	4.06e-17
CD70	727.249	-0.631065	0.235941	-2.67467	0.00748032	0.0283057	0.0114626
CD74	287.321	1.43596	0.393353	3.65055	0.00026168	0.0019459	0.000788009
CD81	7989.47	-0.376757	0.107595	-3.50162	0.000462445	0.0030745	0.00124504
CD82	1586.16	-0.472435	0.407843	-1.15838	0.246711	0.397016	0.160775
CD83	626.169	-1.24981	0.209811	-5.95683	2.57e-09	1.26e-07	5.12e-08
CD9	5452.71	-0.510868	0.191386	-2.66931	0.00760066	0.0285938	0.0115793
CD99	1214.6	-0.200258	0.413605	-0.484178	0.62826	0.749603	0.303558
CD99L2	6026.3	0.081825	0.119745	0.683326	0.494401	0.641372	0.259729
CDADC1	532.194	0.0363055	0.185784	0.195418	0.845066	0.903658	0.365944
CDAN1	1176.26	-0.283815	0.102881	-2.75869	0.00580344	0.0231616	0.00937946
CDC123	2550.06	-0.679602	0.141175	-4.8139	1.48e-06	2.8e-05	1.13e-05
CDC14A	624.037	0.0235812	0.197932	0.119138	0.905166	0.943295	0.381995
CDC14B	2054.37	0.51927	0.196429	2.64354	0.00820431	0.0303163	0.0122768
CDC16	5185.34	-0.126636	0.192432	-0.658082	0.510486	0.655567	0.265477
CDC20	12058.3	-0.273388	0.172283	-1.58686	0.112545	0.221757	0.0898025
CDC23	3001.64	-0.186749	0.110957	-1.68308	0.0923601	0.191512	0.0775542
CDC25A	933.778	-1.06304	0.262237	-4.05375	5.04e-05	0.000509189	0.0002062
CDC25B	12575.2	0.0944115	0.143333	0.658686	0.510097	0.655473	0.265439
CDC25C	1344.78	-0.00866592	0.207889	-0.0416852	0.96675	0.980675	0.397132
CDC26	496.146	-0.0861239	0.205174	-0.41976	0.674661	0.783367	0.317231
CDC27	8042	0.368816	0.146896	2.51073	0.0120483	0.0409194	0.0165707
CDC34	2949.05	0.204903	0.179885	1.13908	0.25467	0.406159	0.164477
CDC37	6437.1	-0.213713	0.124725	-1.71347	0.0866264	0.182436	0.0738791
CDC37L1	1023.33	0.456786	0.225836	2.02264	0.0431102	0.10867	0.0440069
CDC40	2930.41	0.167034	0.13197	1.2657	0.20562	0.347796	0.140843
CDC42	7062.4	-0.426067	0.150478	-2.83142	0.00463411	0.0193052	0.00781779
CDC42BPA	5179.65	0.123583	0.127244	0.971224	0.331437	0.489668	0.198295
CDC42BPB	16219.8	0.248792	0.11956	2.08089	0.0374437	0.0976443	0.0395418
CDC42EP1	6656	0.0174893	0.164425	0.106366	0.915292	0.949387	0.384462
CDC42EP2	817.009	0.319789	0.178739	1.78914	0.0735921	0.161636	0.0654556
CDC42EP3	1323.2	0.26404	0.391828	0.673869	0.500395	0.646941	0.261984
CDC42EP4	1852.68	-0.0800832	0.165394	-0.484196	0.628247	0.749603	0.303558
CDC42SE1	2285.65	0.185032	0.163503	1.13168	0.257771	0.40981	0.165956
CDC42SE2	2647.16	-0.0538681	0.136134	-0.395699	0.692327	0.79617	0.322416
CDC45	1341.15	-0.86565	0.248554	-3.48275	0.000496294	0.00324923	0.0013158
CDC5L	4987.57	-0.0824014	0.121176	-0.680015	0.496495	0.643211	0.260474
CDC6	1825.59	-0.600173	0.361861	-1.65857	0.0972016	0.199128	0.0806385
CDC7	2081	-0.426159	0.219326	-1.94304	0.0520109	0.1248	0.0505387
CDC73	3521	0.615153	0.14701	4.18443	2.86e-05	0.00032412	0.000131255
CDCA2	2742.96	-0.0818702	0.236376	-0.346356	0.729075	0.82187	0.332823
CDCA3	2174.71	-0.620529	0.246395	-2.51843	0.011788	0.0402096	0.0162832
CDCA4	3523.2	-0.331933	0.134412	-2.46951	0.0135298	0.0447851	0.0181361
CDCA5	2773.2	-1.16132	0.233078	-4.98256	6.27e-07	1.38e-05	5.58e-06
CDCA7	3588.96	-0.261591	0.209519	-1.24853	0.211836	0.354792	0.143676
CDCA7L	3624.57	-0.000599206	0.131664	-0.00455103	0.996369	0.997718	0.404034
CDCA8	2556.9	-0.57145	0.216062	-2.64484	0.00817285	0.0302336	0.0122434
CDCP1	40700.3	0.169929	0.156032	1.08907	0.276125	0.430757	0.174439
CDH11	33.6803	0.583026	0.780688	0.74681	0.455178	0.608642	0.246474
CDH12	381.116	2.12386	0.726049	2.92522	0.00344207	0.0151903	0.00615144
CDH15	40.886	4.06006	0.859687	4.72272	2.33e-06	4.05e-05	1.64e-05
CDH18	232.521	0.337345	0.689398	0.489333	0.624606	0.747013	0.302509
CDH2	4417.64	-0.635736	0.338789	-1.8765	0.0605871	0.139663	0.0565577
CDH23	202.084	0.479282	0.498169	0.962087	0.336006	0.49416	0.200114
CDH24	815.34	-0.49356	0.207104	-2.38315	0.0171654	0.0539483	0.0218468
CDH4	1510.73	-0.71192	0.447918	-1.5894	0.111971	0.221052	0.0895167
CDHR2	118.575	-0.143924	0.299164	-0.481087	0.630454	0.750904	0.304085
CDHR3	37.3515	1.19526	0.481814	2.48076	0.0131104	0.0437765	0.0177277
CDIPT	1259.3	-0.121931	0.125864	-0.968747	0.332671	0.490839	0.198769
CDK1	3694.32	-0.350675	0.213709	-1.6409	0.100818	0.204121	0.0826606
CDK10	1125	-0.290065	0.244858	-1.18463	0.236165	0.384555	0.155729
CDK11A	837.644	-0.0537497	0.154265	-0.348425	0.727521	0.820897	0.332429
CDK11B	1584.13	0.0141101	0.133155	0.105968	0.915608	0.949641	0.384565
CDK12	6121.44	-0.084019	0.0987089	-0.851179	0.39467	0.551965	0.223523
CDK13	3344.71	0.0845186	0.0848054	0.996619	0.31895	0.476242	0.192858
CDK14	3222.16	0.0710871	0.186511	0.381142	0.703098	0.803696	0.325463
CDK16	4477.21	-0.210293	0.0936468	-2.24559	0.02473	0.0714781	0.0289456
CDK17	3531.89	0.829072	0.215939	3.83938	0.000123345	0.00105238	0.000426171
CDK18	341.005	1.18528	0.31646	3.74543	0.000180087	0.00142761	0.000578123
CDK19	4450.43	0.552658	0.137934	4.00668	6.16e-05	0.000602437	0.000243962
CDK2	2299.2	-0.6123	0.191259	-3.20141	0.00136756	0.00730133	0.00295673
CDK20	434.055	0.839998	0.20299	4.13814	3.5e-05	0.000375231	0.000151953
CDK2AP1	2845.99	-0.458707	0.208243	-2.20274	0.0276128	0.0775045	0.0313861
CDK2AP2	2728.41	0.341716	0.226112	1.51127	0.13072	0.248946	0.100813
CDK4	10134.4	-0.482105	0.15636	-3.0833	0.00204717	0.0100434	0.00406717
CDK5	609.91	-0.156187	0.194551	-0.802808	0.422086	0.578337	0.234202
CDK5R1	522.579	0.0228274	0.216902	0.105243	0.916183	0.950015	0.384716
CDK5R2	173.01	1.4187	0.240371	5.90212	3.59e-09	1.68e-07	6.79e-08
CDK5RAP1	1073.78	-0.669463	0.151685	-4.4135	1.02e-05	0.000138284	5.6e-05
CDK5RAP2	5904.62	-0.0269826	0.159123	-0.16957	0.865348	0.917825	0.371681
CDK5RAP3	4624.52	0.47875	0.130659	3.66411	0.000248199	0.00186745	0.000756241
CDK6	12352.8	0.388849	0.205945	1.88812	0.0590096	0.136856	0.055421
CDK7	170.156	0.837337	0.514633	1.62706	0.103725	0.208736	0.0845293
CDK8	779.567	0.175229	0.144484	1.21279	0.22521	0.371812	0.150568
CDK9	1604.23	0.240017	0.113449	2.11563	0.0343762	0.0915278	0.0370649
CDKAL1	1183.52	-0.285468	0.183486	-1.55581	0.119754	0.232534	0.0941666
CDKL1	439.123	0.2251	0.190038	1.1845	0.236214	0.384582	0.15574
CDKL2	133.438	2.09664	0.475618	4.40825	1.04e-05	0.000141242	5.72e-05
CDKL3	143.78	0.69786	0.264028	2.64313	0.00821442	0.0303355	0.0122846
CDKL5	219.224	0.799541	0.254014	3.14762	0.00164605	0.00848198	0.00343485
CDKN1A	2393.7	0.32876	0.266319	1.23446	0.217032	0.361438	0.146367
CDKN1B	4514.17	0.710821	0.148275	4.79395	1.64e-06	3.03e-05	1.23e-05
CDKN2AIP	987.009	0.655094	0.11973	5.47144	4.46e-08	1.46e-06	5.91e-07
CDKN2AIPNL	2765.3	-0.443952	0.185477	-2.39357	0.0166854	0.0527012	0.0213418
CDKN2C	2150.15	-0.884986	0.282645	-3.13109	0.00174161	0.00883754	0.00357883
CDKN2D	168.312	0.205457	0.303384	0.677217	0.498268	0.644692	0.261073
CDKN3	2285.22	-0.186157	0.199062	-0.935174	0.349699	0.508322	0.205849
CDON	1171.7	0.789063	0.19579	4.03015	5.57e-05	0.00055325	0.000224043
CDPF1	492.223	-0.339644	0.173745	-1.95485	0.0506011	0.122383	0.04956
CDR1	77.291	0.620349	0.488737	1.26929	0.204338	0.346	0.140116
CDR2	1321.13	0.556127	0.124856	4.45414	8.42e-06	0.000118013	4.78e-05
CDR2L	641.788	-0.603848	0.189949	-3.179	0.00147786	0.0077656	0.00314474
CDS2	7694.12	-0.0637789	0.0919383	-0.693715	0.487861	0.635863	0.257498
CDSN	89.3036	-0.109024	0.375253	-0.290535	0.771407	0.851503	0.344823
CDT1	2445.45	-0.58981	0.169758	-3.47441	0.000511977	0.00332411	0.00134612
CDV3	21109.5	-0.177975	0.0897955	-1.98201	0.0474786	0.116702	0.0472593
CDX2	180.837	0.160137	0.421688	0.379751	0.70413	0.804737	0.325885
CDYL	3302.61	0.242134	0.127637	1.89705	0.057821	0.135015	0.0546754
CDYL2	249.316	0.398185	0.760717	0.523434	0.600673	0.727343	0.294543
CEACAM19	188.496	0.836577	0.362398	2.30845	0.0209741	0.0630883	0.0255481
CEBPA-AS1	126.054	0.599163	0.296937	2.01781	0.0436112	0.109501	0.0443434
CEBPA	938.946	0.414676	0.176122	2.35447	0.0185489	0.0572555	0.0231861
CEBPB-AS1	66.9964	0.718719	0.353223	2.03474	0.0418767	0.106411	0.0430918
CEBPB	13102.6	0.754145	0.20085	3.75476	0.000173509	0.00138869	0.000562363
CEBPD	118.924	-0.266092	0.336331	-0.791163	0.428849	0.584415	0.236663
CEBPG	8714.38	0.496158	0.156954	3.16117	0.00157139	0.00815405	0.00330205
CEBPZ	3824.8	-0.188616	0.1447	-1.30349	0.192407	0.330827	0.133971
CEBPZOS	1531.39	-0.107516	0.16679	-0.644622	0.519172	0.661831	0.268014
CECR2	1272.53	0.716014	0.229492	3.12	0.00180854	0.00910425	0.00368684
CECR5	2654.63	-0.250394	0.128891	-1.94267	0.0520556	0.124862	0.050564
CECR6	108.517	0.472886	0.247584	1.91001	0.0561323	0.131884	0.0534074
CECR7	107.988	-0.587266	0.28944	-2.02897	0.0424612	0.107566	0.0435597
CEL	70.6445	1.10822	0.519086	2.13494	0.0327661	0.0881314	0.0356895
CELF1	10619.5	-0.136733	0.0826385	-1.65459	0.098008	0.200113	0.0810372
CELF2	49.7995	0.841336	0.501833	1.67652	0.0936355	0.193622	0.0784087
CELF5	130.787	1.30521	0.573973	2.27399	0.0229664	0.0675623	0.0273599
CELSR1	7162.58	-0.0744735	0.149771	-0.49725	0.619013	0.742258	0.300583
CELSR2	616.494	-0.302327	0.224627	-1.34591	0.178333	0.313306	0.126876
CELSR3	3778.67	-0.12713	0.131739	-0.965012	0.334539	0.492666	0.199509
CEMIP	150.079	0.340903	0.421946	0.807931	0.419131	0.575702	0.233135
CEMP1	215.945	-0.920342	0.211475	-4.35202	1.35e-05	0.000174986	7.09e-05
CEND1	38.3681	1.01691	0.632446	1.60789	0.107859	0.214781	0.0869774
CENPA	1533.51	-0.376512	0.185945	-2.02486	0.0428816	0.108323	0.0438663
CENPB	7076.42	-0.412606	0.143353	-2.87825	0.00399893	0.0171475	0.006944
CENPBD1	526.041	0.118369	0.235373	0.502899	0.615036	0.738701	0.299143
CENPBD1P1	1854.65	-0.37649	0.128795	-2.92318	0.00346476	0.0152752	0.00618583
CENPC	780.413	0.0276477	0.159781	0.173035	0.862624	0.915811	0.370865
CENPE	4098.29	-0.0647139	0.232519	-0.278316	0.78077	0.858494	0.347654
CENPF	16284.9	-0.0486717	0.233226	-0.208689	0.834691	0.896236	0.362938
CENPH	926.034	-0.642992	0.157974	-4.07023	4.7e-05	0.000480872	0.000194733
CENPI	993.266	-0.678358	0.292711	-2.3175	0.0204764	0.0619552	0.0250893
CENPJ	735.313	-0.458751	0.189189	-2.42483	0.0153157	0.0492993	0.0199641
CENPK	421.188	-0.39928	0.314538	-1.26942	0.204293	0.346	0.140116
CENPL	1072.51	0.296693	0.21081	1.4074	0.15931	0.287983	0.116621
CENPM	806.944	-0.773746	0.303766	-2.54718	0.0108598	0.0376515	0.0152473
CENPN	2081.5	-0.748764	0.194865	-3.84248	0.0001218	0.00103987	0.000421102
CENPO	1610.07	-0.694579	0.229473	-3.02685	0.00247116	0.0116884	0.00473331
CENPP	476.869	-0.29408	0.172947	-1.70041	0.0890537	0.186281	0.075436
CENPQ	638.918	0.621633	0.237894	2.61306	0.00897349	0.0324734	0.0131504
CENPT	1412.81	0.0277801	0.104722	0.265276	0.790797	0.865514	0.350497
CENPU	1950.68	-0.583854	0.222825	-2.62023	0.008787	0.0319526	0.0129394
CENPV	2337.68	-0.367634	0.15721	-2.3385	0.0193614	0.0592927	0.0240111
CENPW	797.857	-0.907638	0.183784	-4.93862	7.87e-07	1.66e-05	6.74e-06
CEP104	2627.15	0.191431	0.104408	1.83349	0.0667292	0.150333	0.0608784
CEP112	514.077	0.786199	0.149734	5.25064	1.52e-07	4.1e-06	1.66e-06
CEP120	3840.41	0.454808	0.1204	3.77748	0.000158422	0.00128966	0.000522258
CEP126	339.761	1.08292	0.272659	3.9717	7.14e-05	0.000677476	0.00027435
CEP128	727.883	-0.406694	0.27322	-1.48852	0.136613	0.256933	0.104047
CEP131	1526.11	0.293425	0.113011	2.59643	0.00941988	0.0336406	0.013623
CEP135	1684.38	0.440356	0.162162	2.71554	0.00661686	0.025714	0.0104131
CEP152	1050.36	-0.602772	0.193788	-3.11047	0.00186791	0.00931503	0.0037722
CEP162	663.243	-0.301843	0.194085	-1.55521	0.119896	0.232659	0.0942172
CEP164	3534.16	0.0613722	0.168611	0.363988	0.715867	0.812293	0.328945
CEP170	753.082	0.236476	0.243145	0.972574	0.330765	0.488893	0.197981
CEP170B	5597.94	0.496813	0.14115	3.51975	0.000431954	0.00289346	0.00117173
CEP19	418.214	-0.118891	0.158362	-0.750757	0.452799	0.606314	0.245532
CEP192	2714.96	-0.416336	0.128857	-3.23099	0.00123363	0.00673488	0.00272734
CEP250	8310.64	-0.269374	0.20496	-1.31427	0.188754	0.326445	0.132196
CEP290	3513.24	0.395015	0.178146	2.21736	0.0265983	0.0753255	0.0305037
CEP295	1951.27	-0.379298	0.213878	-1.77343	0.076157	0.165792	0.0671387
CEP295NL	30.4922	0.865067	0.450664	1.91954	0.054916	0.129788	0.0525587
CEP350	6164.68	0.143832	0.147031	0.978242	0.327955	0.486468	0.196999
CEP41	1703.81	0.466298	0.209114	2.22987	0.0257561	0.0736918	0.0298421
CEP44	1222.64	0.207814	0.170796	1.21674	0.223704	0.369784	0.149747
CEP55	3741.08	-0.457919	0.365111	-1.25419	0.209773	0.352624	0.142798
CEP57	4207.62	0.460078	0.206365	2.22944	0.0257849	0.0737264	0.0298561
CEP57L1	1098.02	0.324567	0.191178	1.69772	0.0895604	0.187135	0.0757818
CEP63	1821.32	0.0778283	0.119441	0.651604	0.514656	0.658823	0.266796
CEP68	1846.77	0.233192	0.13062	1.78527	0.0742182	0.162716	0.0658931
CEP70	1925.29	0.191012	0.147512	1.29489	0.195359	0.33452	0.135467
CEP72	619.533	0.0219702	0.203149	0.108148	0.913878	0.948774	0.384214
CEP76	511.687	-0.278028	0.181376	-1.53289	0.125304	0.240559	0.0974164
CEP78	1744.71	-0.0859419	0.147479	-0.582739	0.560069	0.69506	0.28147
CEP83-AS1	45.0793	0.192017	0.424384	0.452461	0.650937	0.766669	0.310469
[truncated: 11,311 more rows]

## Sheet: A375-B1LKO-ParentalDESeq2
Gene_Name	Base_Mean_All_Samples	Log2(Treatment/Control)	Log2FC_Standard_Error	Wald_Statistic	p-value	Benjamini_Hochberg_Correction	q-value
A1BG-AS1	228.682	-0.347977	0.245402	-1.41798	0.156195	0.605947	0.456103
A1BG	403.956	-0.694737	0.306959	-2.26329	0.0236178	0.370797	0.279103
A2M	561.037	0.124516	0.246372	0.505399	0.613279	0.877444	0.660462
A3GALT2	40.7968	-1.495	0.997547	-1.49868	0.133958	0.583658	0.439326
A4GALT	1268.24	-0.570369	0.752457	-0.758009	0.448446	0.800529	0.602567
AAAS	4319.75	0.30131	0.141645	2.12722	0.0334018	0.413297	0.311093
AACS	3548.63	-0.332856	0.177896	-1.87107	0.061335	0.481563	0.362478
AACSP1	249.814	-0.108052	0.34051	-0.317324	0.750998	0.926481	0.697372
AADAT	1452.99	0.209303	0.18242	1.14737	0.251229	0.683398	0.514401
AAED1	437.531	-0.228291	0.381446	-0.598488	0.549514	0.850458	0.640149
AAGAB	3350.86	0.169602	0.0923966	1.83559	0.0664186	0.495375	0.372874
AAK1	5160.1	-0.161427	0.121753	-1.32586	0.184886	0.633195	0.476613
AAMDC	189.482	0.0778483	0.350705	0.221977	0.824332	0.951341	0.716085
AAMP	5817.33	0.0608861	0.101189	0.601706	0.54737	0.85023	0.639977
AAR2	4147.53	0.074212	0.0961717	0.771662	0.440315	0.795952	0.599122
AARD	82.4521	0.468719	0.48336	0.969709	0.332192	0.739736	0.556808
AARS	22892.3	0.506154	0.318329	1.59003	0.111827	0.561652	0.422761
AARS2	3378.43	-0.00789744	0.151636	-0.0520815	0.958464	0.990198	0.745333
AARSD1	1572.58	0.152739	0.139848	1.09218	0.274752	0.703165	0.52928
AASDH	1405.06	-0.0126451	0.158475	-0.0797926	0.936402	0.98345	0.740253
AASDHPPT	6320.62	0.276582	0.204139	1.35487	0.175459	0.626389	0.47149
AASS	3827.2	0.130184	0.12036	1.08162	0.27942	0.707562	0.532589
AATBC	138.477	-0.966344	0.398526	-2.4248	0.015317	0.314738	0.236907
AATF	357.129	-1.83225	0.597288	-3.06761	0.00215777	0.129964	0.0978253
AATK	445.132	0.0847159	0.33904	0.24987	0.802688	0.943971	0.710538
ABALON	168.526	0.192929	0.503319	0.383313	0.701488	0.912941	0.687181
ABAT	1121.89	0.377605	0.527707	0.715559	0.474264	0.814538	0.613112
ABCA1	2508.73	-0.162187	0.274946	-0.589885	0.555268	0.853433	0.642388
ABCA10	383.377	-0.27849	0.532285	-0.523197	0.600837	0.870823	0.655478
ABCA11P	500.668	0.1412	0.220413	0.640613	0.521774	0.836836	0.629896
ABCA13	138.681	-0.0253969	0.765779	-0.0331647	0.973543	0.993546	0.747853
ABCA2	6913.93	-0.759607	0.275799	-2.75421	0.00588348	0.20979	0.157911
ABCA3	143.202	-0.175854	0.509078	-0.345436	0.729767	0.921024	0.693265
ABCA5	701.55	0.0508273	0.329718	0.154154	0.877488	0.966626	0.72759
ABCA6	111.268	-0.514431	0.625681	-0.822194	0.410967	0.781912	0.588554
ABCA7	482.429	-0.0507245	0.249963	-0.202928	0.839192	0.956187	0.719732
ABCA8	981.994	0.237532	1.64908	0.144039	0.885469	0.969053	0.729417
ABCB1	447.173	-0.00185599	0.530846	-0.00349629	0.99721	0.999151	0.752072
ABCB10	2887.67	0.0330945	0.222828	0.148521	0.881932	0.968627	0.729096
ABCB4	178.818	0.107957	0.281147	0.383987	0.700988	0.912897	0.687148
ABCB6	1773.91	-0.0584123	0.186949	-0.31245	0.754698	0.927954	0.698481
ABCB7	1856.9	-0.0254303	0.194086	-0.131026	0.895755	0.97328	0.732599
ABCB8	2064.79	0.363662	0.193158	1.88271	0.0597392	0.478861	0.360444
ABCB9	1205.07	-0.284592	0.394128	-0.722082	0.470244	0.812896	0.611876
ABCC1	1723.83	-0.374141	0.2274	-1.6453	0.0999086	0.548393	0.412782
ABCC10	1333.39	-0.242678	0.160677	-1.51035	0.130953	0.579959	0.436542
ABCC2	1675.8	-0.294876	0.400353	-0.736542	0.461401	0.808248	0.608377
ABCC3	835.049	1.28435	0.370975	3.4621	0.000535986	0.0574804	0.0432661
ABCC4	4459.11	0.196213	0.236544	0.829498	0.406823	0.780459	0.58746
ABCC5	1919.31	-0.332941	0.159135	-2.09218	0.0364221	0.421717	0.317431
ABCD1	2435.43	-0.640902	0.353202	-1.81455	0.0695931	0.50212	0.377951
ABCD3	3434.78	0.1175	0.137372	0.855342	0.392362	0.773496	0.582219
ABCD4	1652.42	-0.254898	0.171705	-1.48451	0.137673	0.587144	0.44195
ABCE1	9792.29	0.244182	0.210251	1.16138	0.245486	0.678763	0.510912
ABCF1	183.722	-0.151433	0.367581	-0.411971	0.68036	0.903554	0.680115
ABCF2	7979.63	0.622142	0.250715	2.48147	0.013084	0.2973	0.223781
ABCF3	2133.15	-0.0789753	0.109196	-0.723241	0.469532	0.81253	0.6116
ABCG1	182.159	-0.440056	0.675516	-0.651437	0.514764	0.83223	0.626428
ABCG2	207.161	0.405404	0.54165	0.748461	0.454182	0.804178	0.605314
ABCG4	46.1655	-0.140477	0.48965	-0.286893	0.774194	0.934181	0.703169
ABHD1	59.5581	-0.0152276	0.437134	-0.034835	0.972211	0.993275	0.747649
ABHD10	2979.22	0.168608	0.231482	0.728387	0.466377	0.810674	0.610203
ABHD11	862.321	0.0135588	0.173068	0.0783439	0.937554	0.984133	0.740768
ABHD12	3231.54	-0.135679	0.102209	-1.32747	0.184354	0.633195	0.476613
ABHD12B	38.5289	-0.445089	0.620465	-0.717348	0.473159	0.814389	0.612999
ABHD13	1628.74	0.00189968	0.161675	0.01175	0.990625	0.997264	0.750652
ABHD14A	550.073	0.035919	0.351492	0.10219	0.918606	0.97874	0.736709
ABHD14B	5661.66	0.329383	0.234229	1.40624	0.159652	0.60936	0.458672
ABHD15	1119.06	0.0619681	0.117955	0.525355	0.599337	0.870175	0.654991
ABHD16A	88.2214	0.842388	0.914892	0.920751	0.357181	0.754683	0.568058
ABHD16B	271.75	-0.20602	0.230716	-0.89296	0.371878	0.76411	0.575154
ABHD17A	2763.91	-0.043154	0.141445	-0.305094	0.760295	0.929915	0.699957
ABHD17B	2424.92	0.0098402	0.145969	0.0674128	0.946253	0.986376	0.742456
ABHD17C	9376.96	-0.141344	0.384179	-0.367911	0.71294	0.91535	0.688994
ABHD2	15776.9	0.462858	0.645177	0.717413	0.473119	0.814389	0.612999
ABHD3	855.476	0.136049	0.297397	0.457466	0.647336	0.893409	0.672479
ABHD4	648.039	-0.087021	0.212479	-0.40955	0.682136	0.904403	0.680754
ABHD5	1214.41	0.311064	0.242885	1.2807	0.200297	0.644998	0.485497
ABHD6	1097.94	0.260283	0.310044	0.839502	0.401188	0.777547	0.585268
ABHD8	1846.96	-0.30959	0.275578	-1.12342	0.261259	0.691675	0.520631
ABI1	2255.91	0.00779615	0.127311	0.061237	0.95117	0.987805	0.743532
ABI2	6390.99	0.0637819	0.119944	0.531762	0.594891	0.869337	0.65436
ABI3BP	457.556	1.44883	1.31358	1.10296	0.270046	0.698988	0.526136
ABL1	9352.18	-0.173135	0.169684	-1.02034	0.307567	0.72709	0.547289
ABL2	9728.15	-0.184823	0.294473	-0.627641	0.530239	0.840169	0.632404
ABLIM1	2202.46	0.440572	0.314515	1.4008	0.161274	0.610915	0.459842
ABLIM3	1065.09	-0.461162	0.76515	-0.602708	0.546703	0.85023	0.639977
ABR	804.174	-0.489804	0.310871	-1.57558	0.115122	0.564881	0.425192
ABRACL	868.011	0.302466	0.166874	1.81254	0.0699026	0.502473	0.378217
ABT1	1704.53	0.102224	0.164971	0.619649	0.535489	0.843228	0.634707
ABTB1	1091.78	-0.405114	0.364737	-1.1107	0.266698	0.696563	0.524311
ABTB2	2840.08	-0.154008	0.261943	-0.587943	0.556571	0.853755	0.642631
ACAA1	1883.81	0.23994	0.239587	1.00147	0.316598	0.731248	0.550418
ACAA2	1759.4	0.24892	0.174391	1.42737	0.153474	0.603838	0.454516
ACACA	853.553	-0.345849	0.398312	-0.868286	0.385238	0.76928	0.579045
ACACB	870.48	-0.337328	0.19528	-1.72741	0.0840948	0.526513	0.396312
ACAD10	2447.42	0.0215816	0.170667	0.126455	0.899372	0.973878	0.733049
ACAD11	1308.59	-0.0530267	0.24501	-0.216426	0.828655	0.95276	0.717153
ACAD8	1048.33	0.0636307	0.135717	0.468849	0.639177	0.888732	0.668958
ACAD9	2573.04	0.479413	0.204415	2.34529	0.0190121	0.339125	0.255263
ACADM	2715.21	0.313801	0.127992	2.45173	0.014217	0.305568	0.230005
ACADS	546.768	-0.19833	0.219365	-0.904109	0.365938	0.760214	0.572221
ACADSB	1686.17	0.244525	0.155848	1.56899	0.11665	0.567454	0.427129
ACADVL	21970.1	-0.0656319	0.189744	-0.345897	0.72942	0.921024	0.693265
ACAN	5868.2	0.872916	1.60572	0.543627	0.586698	0.865633	0.651571
ACAP1	101.366	-0.98436	0.433211	-2.27224	0.0230719	0.366561	0.275914
ACAP2	3484.63	-0.138317	0.120443	-1.1484	0.250803	0.68329	0.51432
ACAP3	2668.94	-0.413688	0.18913	-2.18733	0.0287187	0.40014	0.30119
ACAT1	3577.55	0.137067	0.244879	0.559733	0.575662	0.860147	0.647442
ACAT2	1519.06	0.174198	0.278033	0.626538	0.530962	0.840258	0.632471
ACBD3	6036.7	-0.0787373	0.112274	-0.701296	0.483118	0.818751	0.616283
ACBD4	532.382	-0.28213	0.224974	-1.25406	0.209821	0.654537	0.492677
ACBD5	2767.18	0.0756334	0.151987	0.497629	0.618745	0.880013	0.662396
ACBD6	2636.54	0.0418639	0.142513	0.293756	0.768945	0.932749	0.70209
ACBD7	382.293	-0.45461	0.505495	-0.899337	0.368473	0.762602	0.574019
ACCS	485.659	-0.538072	0.30332	-1.77394	0.0760729	0.511118	0.384724
ACD	2593.52	0.128973	0.118302	1.0902	0.275626	0.703953	0.529873
ACE	48.2215	-0.223218	0.404859	-0.551349	0.581394	0.862843	0.649472
ACER2	218.607	0.0495038	0.336651	0.147048	0.883094	0.968926	0.729321
ACER3	2208.15	-0.40325	0.12778	-3.15583	0.00160043	0.105979	0.0797712
ACHE	104.183	-0.986842	0.88667	-1.11297	0.265719	0.694819	0.522998
ACIN1	10927.3	0.126341	0.124805	1.01231	0.311389	0.728976	0.548708
ACLY	24456.6	0.122997	0.0943528	1.30358	0.192376	0.639001	0.480983
ACO1	2928.14	-0.284016	0.211269	-1.34433	0.17884	0.630237	0.474386
ACO2	5740.04	0.0116351	0.121908	0.095442	0.923964	0.979501	0.737281
ACOT1	90.0232	-0.0920027	0.358606	-0.256556	0.797521	0.943094	0.709878
ACOT11	76.332	-0.0949756	0.536991	-0.176866	0.859613	0.962262	0.724305
ACOT13	830.472	0.0743817	0.150061	0.495677	0.620123	0.880672	0.662892
ACOT2	630.932	-0.241016	0.150026	-1.60649	0.108166	0.556442	0.41884
ACOT7	13907.3	-0.00503115	0.147225	-0.0341733	0.972739	0.993304	0.747671
ACOT8	1321.49	-0.223748	0.190766	-1.17289	0.240839	0.675078	0.508139
ACOT9	2811.53	0.151422	0.204815	0.739311	0.459718	0.807527	0.607834
ACOX1	3287.04	-0.0869359	0.141089	-0.616177	0.537778	0.844926	0.635985
ACOX2	578.764	0.61737	0.307754	2.00605	0.0448511	0.4481	0.33729
ACOX3	1226.36	-0.107028	0.174722	-0.612564	0.540165	0.846381	0.637081
ACP1	4312.7	0.0692973	0.158602	0.436926	0.662165	0.89673	0.674979
ACP2	2292.03	-0.139864	0.151678	-0.922113	0.35647	0.75409	0.567612
ACP5	1051.68	0.592365	0.484398	1.22289	0.221372	0.660848	0.497428
ACP6	2479.26	-0.18885	0.197625	-0.955598	0.339275	0.744204	0.560171
ACPP	329.363	-0.559673	0.775951	-0.721274	0.470741	0.813204	0.612107
ACRC	102.521	-0.314174	0.434578	-0.72294	0.469717	0.812675	0.611709
ACRV1	51.1908	-0.148955	0.391703	-0.380275	0.703741	0.913343	0.687483
ACSF2	596.091	-0.369261	0.450882	-0.818974	0.412801	0.782211	0.588779
ACSF3	1969.27	0.0179206	0.126392	0.141787	0.887249	0.969946	0.730089
ACSL1	2158.48	0.227739	0.323706	0.703535	0.481722	0.818107	0.615798
ACSL3	18251.9	-0.105298	0.286226	-0.367885	0.712959	0.91535	0.688994
ACSL4	6000.62	-0.0570569	0.192255	-0.296777	0.766637	0.931706	0.701305
ACSL5	85.6733	-1.68396	1.14499	-1.47072	0.141367	0.591244	0.445036
ACSM3	116.674	-0.539877	0.673762	-0.801288	0.422965	0.787196	0.592531
ACSS1	1035.07	0.21494	0.273565	0.785698	0.432044	0.791203	0.595547
ACSS2	5399.91	0.53105	0.715923	0.741769	0.458228	0.80674	0.607242
ACSS3	796.812	-0.679804	0.342019	-1.98762	0.046854	0.452359	0.340496
ACTA2	1099.45	0.609135	0.41809	1.45695	0.145131	0.596729	0.449165
ACTB	116321	0.434976	0.212172	2.05011	0.0403537	0.436626	0.328654
ACTBL2	195.44	-0.695431	0.706142	-0.984832	0.324707	0.735215	0.553404
ACTG1	118821	0.205102	0.135785	1.5105	0.130917	0.579959	0.436542
ACTG1P20	172.839	-0.133101	0.328051	-0.405731	0.68494	0.905323	0.681447
ACTL10	299.919	-0.527482	0.355681	-1.48302	0.138069	0.587309	0.442074
ACTL6A	3364.76	0.223144	0.226995	0.983034	0.325591	0.735685	0.553758
ACTL8	212.476	0.858393	0.684116	1.25475	0.20957	0.654512	0.492658
ACTN1	28063.9	0.111217	0.13767	0.807855	0.419174	0.785834	0.591506
ACTN2	180.078	0.376738	0.557218	0.676104	0.498974	0.824129	0.620331
ACTN4	71068.3	0.150962	0.141646	1.06577	0.286528	0.71147	0.535531
ACTR10	1900.7	0.109854	0.10013	1.09711	0.272592	0.701093	0.527721
ACTR1A	8780.29	0.25422	0.100372	2.53279	0.011316	0.279561	0.210429
ACTR1B	2850.28	0.0465446	0.154944	0.300396	0.763875	0.930997	0.700772
ACTR2	21780.2	0.126374	0.153812	0.821617	0.411295	0.781973	0.5886
ACTR3	7777.93	0.250925	0.177256	1.41561	0.156891	0.607313	0.457131
ACTR3B	974.045	-0.0580368	0.194743	-0.298017	0.76569	0.93146	0.70112
ACTR5	878.245	-0.00844152	0.202214	-0.0417454	0.966702	0.991927	0.746635
ACTR6	2540.23	-0.106447	0.141292	-0.753383	0.45122	0.802857	0.604319
ACTR8	2110.18	0.141252	0.146115	0.966718	0.333685	0.740639	0.557487
ACTRT3	65.3267	0.0928598	0.526081	0.176513	0.859891	0.962339	0.724363
ACVR1	1627.75	0.158476	0.243358	0.651203	0.514916	0.832284	0.626469
ACVR1B	1752.89	-0.123078	0.126582	-0.972318	0.330892	0.739367	0.55653
ACVR1C	88.2903	0.19445	0.711427	0.273324	0.784604	0.938277	0.706251
ACVR2A	582.758	-0.159605	0.142323	-1.12143	0.262106	0.692196	0.521024
ACVR2B-AS1	145.208	-0.124841	0.431882	-0.289064	0.772533	0.934048	0.703068
ACVR2B	2313.6	-0.10277	0.257949	-0.398412	0.690326	0.908078	0.68352
ACY1	4203.23	0.408757	0.217568	1.87876	0.0602777	0.478902	0.360475
ACYP1	300.888	-0.336383	0.363001	-0.926672	0.354097	0.753094	0.566862
ACYP2	196.373	0.0823943	0.218676	0.376788	0.706331	0.914095	0.688049
ADA	1331.97	0.0362908	0.27485	0.132039	0.894954	0.972958	0.732356
ADAL	1210.41	0.261406	0.155443	1.68168	0.0926307	0.53985	0.406351
ADAM10	11731.4	0.0386869	0.132212	0.292612	0.769819	0.93285	0.702167
ADAM11	453.248	-0.574176	0.346847	-1.65541	0.0978404	0.545305	0.410457
ADAM12	660.612	-0.398999	0.429802	-0.928332	0.353235	0.752732	0.56659
ADAM15	10257.7	-0.466622	0.199988	-2.33325	0.0196351	0.340434	0.256248
ADAM17	3765.54	-0.0573408	0.168695	-0.339909	0.733925	0.922048	0.694036
ADAM19	6396.66	0.0433844	0.695079	0.0624164	0.950231	0.987679	0.743436
ADAM1A	239.267	0.0197356	0.247443	0.0797583	0.93643	0.98345	0.740253
ADAM22	1768.76	0.29068	0.19381	1.49982	0.133661	0.583273	0.439036
ADAM23	2035.28	-0.658747	0.307365	-2.14321	0.0320964	0.408962	0.30783
ADAM8	276.48	-0.988437	0.423838	-2.33211	0.019695	0.340434	0.256248
ADAM9	6865.06	0.196574	0.263976	0.744666	0.456474	0.806018	0.606698
ADAMTS1	882.565	-0.840528	0.438887	-1.91513	0.0554754	0.468842	0.352902
ADAMTS10	134.287	-1.3358	0.803216	-1.66306	0.0962996	0.543309	0.408954
ADAMTS12	1613.58	-0.185328	1.17061	-0.158318	0.874207	0.965938	0.727072
ADAMTS13	369.2	-1.79208	0.592087	-3.02671	0.00247229	0.141985	0.106874
ADAMTS15	547.921	-0.655267	0.373413	-1.7548	0.0792932	0.515606	0.388102
ADAMTS16	425.4	-0.0832456	0.411577	-0.20226	0.839714	0.956391	0.719886
ADAMTS17	226.521	0.661081	0.668483	0.988927	0.322699	0.733953	0.552455
ADAMTS2	240.625	-5.8887	2.02543	-2.90738	0.00364465	0.171408	0.12902
ADAMTS20	265.794	-0.76433	0.488942	-1.56323	0.117998	0.568932	0.428241
ADAMTS3	749.182	-0.374205	0.167708	-2.23129	0.0256622	0.383201	0.288439
ADAMTS4	169.942	-0.301314	0.406824	-0.740649	0.458906	0.807051	0.607476
ADAMTS6	357.606	-0.187095	0.380743	-0.491396	0.623147	0.881685	0.663654
ADAMTS7	757.55	-0.874519	0.355355	-2.46097	0.013856	0.301763	0.227141
ADAMTS9	934.9	-0.0832484	0.973399	-0.0855235	0.931845	0.982465	0.739512
ADAMTSL1	59.4243	0.505718	1.0866	0.465413	0.641635	0.890475	0.67027
ADAMTSL3	81.453	-1.15195	2.34557	-0.491115	0.623345	0.881878	0.663799
ADAMTSL4-AS1	50.9467	-1.55128	0.604568	-2.56593	0.0102901	0.269084	0.202542
ADAMTSL4	1616.22	-1.20388	0.338677	-3.55464	0.000378495	0.0446498	0.0336084
ADAMTSL5	447.63	0.1204	0.244583	0.492267	0.62253	0.881342	0.663396
ADAP1	140.725	-1.48505	0.624093	-2.37954	0.0173342	0.3254	0.244932
ADAR	28278.2	0.293065	0.116298	2.51995	0.0117372	0.284508	0.214152
ADARB1	1852.24	0.24901	0.305446	0.815234	0.414938	0.783248	0.58956
ADARB2	20.1505	0.396019	1.06606	0.37148	0.71028	0.914504	0.688357
ADAT1	4050.59	0.245589	0.164512	1.49283	0.13548	0.58561	0.440795
ADAT2	720.587	-0.390079	0.165795	-2.35277	0.0186341	0.335773	0.25274
ADAT3	246.726	-0.137307	0.2429	-0.565282	0.571882	0.858896	0.646501
ADCK1	256.547	0.136764	0.266843	0.512528	0.608282	0.874552	0.658285
ADCK2	1984.88	0.123381	0.148104	0.833069	0.404806	0.779848	0.587
ADCK3	4076.49	0.0325874	0.124403	0.26195	0.79336	0.941313	0.708536
ADCK4	1956.87	-0.265119	0.189023	-1.40258	0.160743	0.610774	0.459736
ADCK5	413.11	-0.158036	0.281377	-0.561652	0.574353	0.859889	0.647248
ADCY1	1254.58	-0.697588	0.395134	-1.76545	0.0774888	0.513177	0.386274
ADCY10P1	153.673	-0.928403	0.392273	-2.36673	0.0179462	0.330789	0.248988
ADCY3	6652.93	0.0924986	0.116366	0.794896	0.426674	0.788021	0.593152
ADCY6	5769	-0.183707	0.176479	-1.04096	0.297894	0.719556	0.541618
ADCY7	3987.39	-0.193081	0.227446	-0.848908	0.395932	0.775068	0.583402
ADCY9	2630.64	0.0700618	0.211497	0.331266	0.740444	0.922372	0.694279
ADCYAP1R1	183.458	-0.255626	0.27781	-0.920149	0.357495	0.754808	0.568152
ADD1	9783.54	0.256098	0.0962176	2.66165	0.00777584	0.233704	0.175912
ADD2	1345.83	1.04023	0.289721	3.59044	0.00033012	0.0421007	0.0316896
ADD3	7255.57	0.145885	0.159805	0.91289	0.3613	0.757387	0.570093
ADGRA2	1681.04	0.0108176	0.207077	0.0522394	0.958338	0.990198	0.745333
ADGRA3	5217.78	0.127055	0.120317	1.056	0.290967	0.714788	0.538029
ADGRB1	73.1023	-1.04578	0.505344	-2.06944	0.0385044	0.430528	0.324063
ADGRB2	1660.52	-0.263114	0.221763	-1.18647	0.235438	0.672271	0.506026
ADGRB3	65.0223	0.674026	1.0624	0.634438	0.525795	0.838365	0.631047
ADGRE1	503.303	0.354225	0.401605	0.882024	0.377764	0.766417	0.57689
ADGRE2	383.814	-0.404054	0.215071	-1.8787	0.0602856	0.478902	0.360475
ADGRE5	9129.7	-0.184114	0.125501	-1.46703	0.142368	0.592753	0.446172
ADGRF1	499.724	-0.0409433	1.92494	-0.0212699	0.98303	0.996069	0.749752
ADGRG1	9422.9	-0.420088	0.292753	-1.43496	0.151299	0.601652	0.45287
ADGRG5	35.5908	-0.406605	0.865595	-0.46974	0.63854	0.888633	0.668884
ADGRG6	5854	-0.492757	0.290793	-1.69453	0.0901649	0.535813	0.403312
ADGRL1	7265.23	-0.364465	0.371501	-0.98106	0.326563	0.735841	0.553876
ADGRL2	2749.24	0.121275	0.33512	0.361886	0.717437	0.916105	0.689563
ADGRL3	505.909	-0.246726	0.337049	-0.732017	0.464158	0.809558	0.609363
ADGRL4	713.333	0.76187	0.546124	1.39505	0.163001	0.61325	0.4616
ADGRV1	990.095	-0.0965938	0.272226	-0.354829	0.722718	0.918466	0.691339
ADH5	7438.2	0.153602	0.100992	1.52093	0.128278	0.579013	0.435829
ADHFE1	40.9802	-1.09101	0.559621	-1.94955	0.05123	0.458849	0.345381
ADI1	1872.39	0.37995	0.238702	1.59173	0.111446	0.561549	0.422684
ADIPOR1	12124.7	0.119873	0.0878028	1.36526	0.172173	0.621904	0.468114
ADIPOR2	8101.87	0.0979965	0.122464	0.800209	0.42359	0.787228	0.592555
ADIRF	108.316	-1.10316	0.421224	-2.61895	0.00882006	0.250092	0.188247
ADK	1679.01	0.0471397	0.249442	0.188981	0.850108	0.959124	0.721943
ADM	569.457	0.682907	0.581978	1.17342	0.240626	0.67505	0.508117
ADM2	524.303	-0.389203	1.19808	-0.324854	0.745291	0.923904	0.695433
ADM5	529.857	-0.256997	0.194157	-1.32365	0.185618	0.634535	0.477621
ADNP-AS1	113.764	-0.10284	0.26489	-0.388235	0.697842	0.911894	0.686393
ADNP	15138.7	0.191158	0.12908	1.48093	0.138625	0.588244	0.442778
ADNP2	2983.61	0.163552	0.147597	1.1081	0.26782	0.697435	0.524967
ADO	2935.2	-0.14929	0.187589	-0.795835	0.426128	0.787639	0.592865
ADORA1	583.398	0.74232	0.476023	1.55942	0.118897	0.570981	0.429784
ADORA2B	1142.06	-0.279562	0.369819	-0.755943	0.449683	0.801728	0.603469
ADPGK	3734.4	0.00140105	0.125108	0.0111987	0.991065	0.997264	0.750652
ADPRH	533.78	0.46485	0.425094	1.09352	0.274164	0.70271	0.528937
ADPRHL1	152.743	-0.104211	0.430021	-0.242339	0.808517	0.945352	0.711577
ADPRHL2	1895.7	0.0752197	0.192833	0.390076	0.69648	0.911133	0.68582
ADPRM	544.032	-0.369196	0.169211	-2.18187	0.0291188	0.401641	0.30232
ADRB2	238.079	-0.558294	0.788	-0.708494	0.478639	0.816857	0.614857
ADRBK1	5716.19	-0.0885505	0.122848	-0.720815	0.471023	0.813346	0.612214
ADRM1	10198	0.101705	0.178345	0.570271	0.568494	0.857583	0.645512
ADSL	6587.05	-0.0170582	0.127227	-0.134077	0.893342	0.972556	0.732054
ADSS	7814.08	0.225355	0.118887	1.89555	0.05802	0.478081	0.359857
ADSSL1	193.891	-0.700132	0.438792	-1.59559	0.11058	0.559862	0.421414
AEBP1	9753.28	-0.894899	0.393497	-2.27422	0.0229526	0.365451	0.275079
AEBP2	2549.14	0.0888384	0.171879	0.516867	0.605249	0.872883	0.657029
AEN	9133.12	-0.257	0.290858	-0.883592	0.376917	0.766417	0.57689
AES	11776.9	0.165805	0.124285	1.33408	0.182179	0.63108	0.475021
AFAP1-AS1	47.6232	-1.20119	0.486687	-2.4681	0.0135831	0.299671	0.225565
AFAP1	21753.9	-0.222353	0.256581	-0.866598	0.386162	0.769493	0.579206
AFAP1L1	2937.39	-0.00788557	0.377864	-0.0208688	0.98335	0.996069	0.749752
AFAP1L2	3775.01	0.189281	0.594468	0.318404	0.750178	0.926034	0.697036
AFF1	2463.65	-0.456712	0.269673	-1.69357	0.0903462	0.536005	0.403457
AFF2	135.945	-2.07274	1.00363	-2.06524	0.0389001	0.430528	0.324063
AFF3	371.635	0.620124	0.630335	0.9838	0.325214	0.735527	0.553639
AFF4	13578.7	0.119807	0.134726	0.88926	0.373863	0.76512	0.575914
AFG3L1P	1012.08	0.0441798	0.178786	0.24711	0.804823	0.944308	0.710791
AFG3L2	5456.18	0.166402	0.143039	1.16334	0.244693	0.678392	0.510633
AFMID	813.044	0.107825	0.128564	0.838684	0.401647	0.777799	0.585458
AFTPH	2734.54	-0.0212036	0.101232	-0.209455	0.834093	0.954715	0.718625
AGA	1594.22	0.242638	0.292897	0.82841	0.407439	0.780571	0.587544
AGAP1	3237.46	-0.0548324	0.17673	-0.310261	0.756362	0.928229	0.698688
AGAP2-AS1	743.793	0.632815	0.295072	2.14461	0.0319837	0.408962	0.30783
AGAP2	986.136	-0.613228	0.475427	-1.28985	0.197103	0.643198	0.484143
AGAP3	8017.4	-0.0507499	0.254321	-0.19955	0.841833	0.95688	0.720254
AGAP4	493.543	0.0729712	0.180106	0.405158	0.685361	0.905664	0.681703
AGAP5	164.665	0.123858	0.261723	0.473242	0.636041	0.887129	0.667752
AGAP6	756.107	0.0150195	0.154689	0.097095	0.922651	0.979241	0.737085
AGAP9	354.93	-0.246285	0.17741	-1.38823	0.165068	0.61325	0.4616
AGBL2	78.0129	0.111817	0.409609	0.272985	0.784865	0.93836	0.706314
AGBL5	3347.06	0.271576	0.141013	1.9259	0.0541174	0.467018	0.35153
AGFG1	4011.11	0.141358	0.127731	1.10668	0.26843	0.697805	0.525245
AGFG2	914.866	0.201343	0.170969	1.17766	0.238932	0.674305	0.507557
AGGF1	4019.3	0.179682	0.130863	1.37305	0.169736	0.618794	0.465773
AGK	1298.2	0.349981	0.143141	2.44501	0.014485	0.308809	0.232444
AGL	2784.49	0.108806	0.121481	0.895661	0.370434	0.763542	0.574726
AGMO	2286.26	0.0355165	0.312755	0.11356	0.909586	0.975847	0.734531
AGO1	7598.77	0.043337	0.117144	0.369947	0.711422	0.914808	0.688586
AGO2	4188.93	-0.000374694	0.140742	-0.00266227	0.997876	0.999186	0.752098
AGO3	1577.42	-0.108644	0.11313	-0.96035	0.336879	0.742466	0.558863
AGO4	1254.34	-0.00654917	0.164352	-0.0398486	0.968214	0.991932	0.746638
AGPAT1	60.2103	-0.245411	0.38062	-0.644766	0.519079	0.835942	0.629222
AGPAT2	2525.75	-0.503261	0.226759	-2.21936	0.0264622	0.38723	0.291472
AGPAT3	5815.75	0.15078	0.132378	1.13901	0.254698	0.687105	0.517191
AGPAT4	401.525	-0.515211	0.324216	-1.5891	0.112039	0.5618	0.422873
AGPAT5	3648.18	-0.0544133	0.125137	-0.434831	0.663685	0.897375	0.675464
AGPS	7682.36	0.018883	0.121545	0.155359	0.876539	0.966502	0.727496
AGRN	22536	-0.479777	0.315422	-1.52106	0.128244	0.579013	0.435829
AGT	54.3474	-0.394233	0.441552	-0.892835	0.371946	0.76411	0.575154
AGTPBP1	1522.46	-0.0711707	0.225003	-0.316311	0.751767	0.926989	0.697755
AGTRAP	1409.14	0.0680244	0.176568	0.385259	0.700046	0.912571	0.686902
AHCTF1	15664.1	0.148257	0.183549	0.807723	0.41925	0.785872	0.591534
AHCTF1P1	1503.79	0.253235	0.189731	1.33471	0.181972	0.630867	0.474861
AHCY	14946.3	-0.0805265	0.101802	-0.791014	0.428936	0.789807	0.594497
AHCYL1	12478	0.135183	0.118973	1.13625	0.255854	0.687913	0.5178
AHCYL2	1744.03	-0.309499	0.216448	-1.4299	0.152747	0.603703	0.454414
AHDC1	3814.61	0.0180509	0.14889	0.121237	0.903504	0.974659	0.733637
AHI1	1278.18	-0.102869	0.135134	-0.761233	0.446518	0.799156	0.601534
AHNAK	67719.1	-0.0245039	0.306591	-0.079924	0.936298	0.98345	0.740253
AHNAK2	2518.92	-0.351329	0.349236	-1.00599	0.314419	0.730399	0.549779
AHR	8667.09	0.0770667	0.129302	0.596019	0.551162	0.851403	0.64086
AHRR	2315.85	0.343404	0.2534	1.35519	0.175359	0.626389	0.47149
AHSA1	7524.12	0.121449	0.130597	0.929951	0.352396	0.75225	0.566227
AHSA2	2142.06	-0.636761	0.216482	-2.9414	0.00326729	0.163434	0.123018
AIDA	3676.01	0.10162	0.149887	0.677979	0.497785	0.823721	0.620024
AIF1L	2681.06	-0.729045	0.261828	-2.78444	0.00536195	0.19826	0.149232
AIFM1	3808	0.127708	0.0913465	1.39806	0.162096	0.612554	0.461076
AIFM2	1052.47	0.199595	0.2991	0.66732	0.504568	0.826506	0.62212
AIFM3	46.0585	-0.696003	0.553296	-1.25792	0.20842	0.653177	0.491653
AIG1	721.18	-0.343623	0.269508	-1.275	0.202308	0.646432	0.486576
AIM1	5100.71	0.0116848	0.270617	0.0431783	0.965559	0.991671	0.746442
AIM2	1051.7	-0.00716307	0.909253	-0.00787798	0.993714	0.99752	0.750844
AIMP1	3406.48	0.24202	0.161137	1.50195	0.133111	0.581885	0.437991
AIMP2	2354.96	0.233725	0.16637	1.40485	0.160067	0.609834	0.459029
AIP	4645.2	-0.0105617	0.137265	-0.0769438	0.938668	0.984286	0.740883
AJAP1	636.069	-0.298042	1.32209	-0.225432	0.821643	0.950489	0.715443
AJUBA	2990.12	-0.207281	1.03535	-0.200203	0.841322	0.956619	0.720058
AK1	1771.56	-0.192249	0.173232	-1.10978	0.267094	0.696907	0.524569
AK2	13745.1	0.25537	0.196172	1.30177	0.192996	0.639151	0.481096
AK3	2631.18	0.0496164	0.233238	0.212728	0.831539	0.954024	0.718104
AK4	4212.09	0.0272067	0.255281	0.106576	0.915126	0.977386	0.735689
AK5	270.294	0.626969	1.25183	0.50084	0.616484	0.879449	0.661971
AK6	138.429	-3.3106	1.05521	-3.13738	0.00170466	0.110693	0.0833202
AK9	64.1137	0.348864	0.429831	0.811632	0.417003	0.784256	0.590318
AKAP1	4348.92	0.178711	0.265583	0.6729	0.501011	0.824552	0.620649
AKAP10	2885.08	-0.0400693	0.090979	-0.440424	0.65963	0.896389	0.674722
AKAP11	7975.29	-0.187968	0.139349	-1.34891	0.177367	0.628627	0.473175
AKAP12	32779.8	0.580123	0.252175	2.30047	0.0214214	0.352196	0.265102
AKAP13	7028.43	-0.301451	0.249894	-1.20631	0.227697	0.665005	0.500556
AKAP17A	115.15	-2.45118	0.793005	-3.091	0.00199482	0.125801	0.0946918
AKAP2	431.75	-0.427863	0.447006	-0.957174	0.338479	0.744014	0.560027
AKAP5	144.211	0.0722238	0.425631	0.169687	0.865257	0.963532	0.725261
AKAP6	252.37	-0.212213	0.244638	-0.867459	0.38569	0.769316	0.579072
AKAP7	403.939	0.288013	0.216964	1.32747	0.184353	0.633195	0.476613
AKAP8	3018.64	0.159045	0.121477	1.30926	0.190447	0.637349	0.479739
AKAP8L	3302.12	-0.131724	0.127797	-1.03073	0.302667	0.722035	0.543484
AKAP9	10302.8	0.238347	0.161455	1.47624	0.13988	0.590387	0.444391
AKIP1	978.197	-0.0464099	0.21186	-0.21906	0.826603	0.952357	0.71685
AKIRIN1	5711.06	0.0802695	0.119042	0.674298	0.500122	0.824552	0.620649
AKIRIN2	2287.58	0.161105	0.0918036	1.75489	0.0792778	0.515606	0.388102
AKNA	1059.4	-0.411575	0.315733	-1.30355	0.192387	0.639001	0.480983
AKR1A1	2386.46	-0.002286	0.12336	-0.0185312	0.985215	0.996478	0.75006
AKR1B1	5303.67	0.176188	0.229745	0.766888	0.443148	0.797424	0.60023
AKR1C1	172.306	-0.336937	0.549022	-0.613703	0.539412	0.845522	0.636434
AKR1C2	955.193	0.114022	0.200428	0.568894	0.569428	0.858265	0.646025
AKR1C3	481.086	0.292038	0.326237	0.895172	0.370695	0.763542	0.574726
AKR7A2	3854.19	0.140942	0.0824711	1.70899	0.0874533	0.533064	0.401243
AKT1	7650.08	0.101236	0.0808852	1.25159	0.210718	0.655164	0.493149
AKT1S1	9000.6	0.114075	0.126286	0.903304	0.366365	0.760448	0.572398
AKT2	9384.58	0.00119229	0.10011	0.0119098	0.990498	0.997264	0.750652
AKT3	643.253	0.0864439	0.423063	0.204329	0.838097	0.955786	0.719431
AKTIP	860.636	-0.0350652	0.276394	-0.126866	0.899046	0.973823	0.733007
ALAD	2477.77	-0.0318577	0.12435	-0.256193	0.797802	0.943129	0.709904
ALAS1	4019.27	0.394781	0.216931	1.81985	0.0687816	0.501947	0.377821
ALCAM	2210.55	0.252342	0.672536	0.375209	0.707505	0.914224	0.688146
ALDH16A1	3843.71	0.0864582	0.103564	0.834827	0.403815	0.779015	0.586373
ALDH18A1	10887.8	0.189038	0.108504	1.74222	0.0814708	0.519739	0.391213
ALDH1A3	75571	0.329307	0.382345	0.861283	0.389082	0.772085	0.581157
ALDH1B1	2765.28	0.0949677	0.152091	0.624413	0.532356	0.841023	0.633047
ALDH1L2	3627.13	0.490639	0.886593	0.553398	0.579991	0.861707	0.648617
ALDH2	1367.14	-0.734078	0.293226	-2.50346	0.0122986	0.287768	0.216606
ALDH3A2	4810.87	0.209787	0.176511	1.18852	0.234628	0.671901	0.505747
ALDH3B1	1213.61	-0.107112	0.743192	-0.144125	0.885402	0.969053	0.729417
ALDH4A1	1311.16	-0.122228	0.178686	-0.684036	0.493952	0.822079	0.618788
ALDH5A1	1534.78	0.0331189	0.248566	0.13324	0.894004	0.972753	0.732202
ALDH6A1	1278.16	-0.256027	0.289949	-0.883008	0.377232	0.766417	0.57689
ALDH7A1	5374.26	0.00260966	0.102783	0.0253901	0.979744	0.995425	0.749267
ALDH9A1	5312.96	0.0155965	0.140617	0.110915	0.911684	0.975985	0.734635
ALDOA	53209.9	0.313444	0.205024	1.52882	0.126309	0.577158	0.434433
ALDOC	2731.05	0.417376	0.283569	1.47187	0.141056	0.590967	0.444827
ALG1	1680.37	0.0503821	0.185877	0.27105	0.786353	0.939245	0.70698
ALG10	679.543	-0.264311	0.26444	-0.99951	0.317548	0.731641	0.550714
ALG10B	1987.16	-0.276014	0.177183	-1.55779	0.119283	0.571461	0.430145
ALG11	872.604	-0.019832	0.176986	-0.112054	0.910781	0.975883	0.734558
ALG12	1144.68	0.0202409	0.18157	0.111477	0.911238	0.975883	0.734558
ALG13	1549.97	-0.0744256	0.18715	-0.397678	0.690868	0.908078	0.68352
ALG14	371.307	0.413637	0.205546	2.01238	0.0441799	0.4481	0.33729
ALG1L2	87.9363	-1.28621	0.532349	-2.4161	0.0156877	0.315253	0.237294
ALG1L9P	52.0254	-0.479096	0.432411	-1.10797	0.267877	0.697455	0.524982
ALG2	1943.02	-0.0112036	0.202059	-0.0554473	0.955782	0.989328	0.744678
ALG3	2802.83	0.0807853	0.102622	0.787209	0.431159	0.790941	0.59535
ALG5	1955.65	0.100838	0.248313	0.406091	0.684676	0.905059	0.681248
ALG6	1099.41	0.138105	0.220227	0.627105	0.53059	0.840258	0.632471
ALG8	3342.4	0.31302	0.122021	2.5653	0.0103088	0.269084	0.202542
ALG9	1131.39	0.131371	0.299771	0.438239	0.661213	0.896564	0.674854
ALK	365.301	-0.232558	1.34164	-0.173339	0.862385	0.962793	0.724705
ALKBH1	817.445	0.202885	0.158075	1.28347	0.199326	0.644903	0.485426
ALKBH2	1764.54	0.0739123	0.108255	0.682759	0.494759	0.822163	0.618851
ALKBH3	1226.26	0.340507	0.169622	2.00744	0.0447026	0.4481	0.33729
ALKBH4	903.554	-0.186738	0.141878	-1.31619	0.18811	0.635836	0.478601
ALKBH5	6192.15	0.0576385	0.110199	0.52304	0.600947	0.870823	0.655478
ALKBH6	755.887	0.29657	0.185486	1.59888	0.109848	0.559455	0.421108
ALKBH7	948.626	-0.351565	0.332963	-1.05587	0.291029	0.714788	0.538029
ALKBH8	2841.95	0.000993259	0.242958	0.00408819	0.996738	0.999067	0.752009
ALMS1-IT1	169.46	-0.212169	0.339134	-0.62562	0.531564	0.840633	0.632754
ALMS1	5470.6	0.105453	0.0861091	1.22464	0.220709	0.660511	0.497174
ALOX12	48.5248	-0.147093	0.386668	-0.380413	0.703639	0.913343	0.687483
ALOX12B	44.7808	-0.703242	0.579799	-1.21291	0.225165	0.663901	0.499725
ALOX15B	57.1319	0.460502	0.423409	1.08761	0.276769	0.705045	0.530695
ALPK1	871.297	-0.117334	0.269333	-0.435646	0.663093	0.897133	0.675282
ALPK2	149.631	0.151177	0.403118	0.375019	0.707647	0.914251	0.688166
ALPK3	89.2427	-0.736489	0.661418	-1.1135	0.265494	0.694819	0.522998
ALPL	66.8423	-0.342901	0.570477	-0.601078	0.547788	0.85023	0.639977
ALPP	31.2685	-2.1576	1.37414	-1.57014	0.116382	0.567301	0.427014
ALS2	1747.46	0.21292	0.132342	1.60886	0.107646	0.554929	0.417701
ALS2CL	80.5643	0.0119599	0.275645	0.0433889	0.965392	0.991671	0.746442
ALS2CR11	319.857	-0.363134	0.296474	-1.22484	0.220634	0.660511	0.497174
ALX1	736.055	-0.0103644	0.265654	-0.0390147	0.968879	0.991932	0.746638
ALX3	152.967	-0.462107	0.293357	-1.57524	0.115202	0.564965	0.425255
ALX4	263.308	-0.597779	0.715067	-0.835977	0.403168	0.778479	0.585969
ALYREF	6145.01	0.160978	0.196565	0.818954	0.412813	0.782211	0.588779
AMACR	11805.8	-0.489119	0.737504	-0.663208	0.507197	0.828393	0.62354
AMBRA1	3281.84	0.064833	0.0903269	0.71776	0.472905	0.81431	0.61294
AMD1	6968.23	0.385978	0.187053	2.06347	0.0390677	0.430528	0.324063
AMDHD2	887.212	0.111155	0.212806	0.522329	0.601441	0.870899	0.655535
AMER1	1761.98	-0.329552	0.245539	-1.34216	0.179544	0.630668	0.474711
AMER2	70.6855	-1.40688	0.586101	-2.4004	0.016377	0.31889	0.240032
AMFR	5683.92	0.0265837	0.137846	0.192851	0.847076	0.958228	0.721268
AMH	537.031	-0.18499	0.305858	-0.604824	0.545296	0.849742	0.63961
AMIGO1	445.632	-0.0983898	0.234701	-0.419213	0.67506	0.901351	0.678457
AMIGO2	4968.93	-0.811149	0.995533	-0.814788	0.415194	0.783248	0.58956
AMIGO3	609.227	0.210527	0.229322	0.918043	0.358596	0.755151	0.568411
AMMECR1	1529.42	0.65444	0.344467	1.89987	0.0574507	0.476944	0.359001
AMMECR1L	2893.66	-0.182342	0.119739	-1.52283	0.127802	0.579013	0.435829
AMN1	381.147	-0.173029	0.311163	-0.556072	0.578161	0.861571	0.648514
AMOT	4634.87	-0.186095	0.25324	-0.734857	0.462427	0.808361	0.608463
AMOTL1	37274	-0.279637	0.337885	-0.827611	0.407891	0.780695	0.587637
AMOTL2	8184.24	0.507029	0.930749	0.544753	0.585923	0.865171	0.651223
AMPD2	4696.97	-0.327183	0.133159	-2.45708	0.014007	0.303184	0.22821
AMPD3	148.614	-0.60941	0.687346	-0.886614	0.375287	0.765454	0.576165
AMT	134.669	-0.802777	0.362661	-2.21357	0.0268581	0.390164	0.293681
AMY2B	52.8204	-0.624088	0.378465	-1.649	0.0991478	0.547187	0.411874
AMZ2	3661.96	0.245735	0.150715	1.63046	0.103004	0.552046	0.415531
AMZ2P1	311.916	0.550162	0.217648	2.52776	0.0114793	0.280698	0.211285
ANAPC1	4617.31	0.327257	0.1753	1.86684	0.0619236	0.483189	0.363702
ANAPC10	558.405	0.194196	0.188021	1.03284	0.301677	0.721009	0.542711
ANAPC11	1955.19	-0.0215318	0.152321	-0.141359	0.887587	0.969946	0.730089
ANAPC13	2835.04	0.32465	0.18473	1.75743	0.0788441	0.514819	0.38751
ANAPC15	1257.64	0.521225	0.240787	2.16468	0.0304125	0.40493	0.304795
ANAPC16	2251.82	0.158294	0.145501	1.08793	0.276628	0.705045	0.530695
ANAPC2	1972.71	-0.308586	0.204257	-1.51077	0.130847	0.579959	0.436542
ANAPC4	1869.9	0.0697807	0.120259	0.580252	0.561745	0.855229	0.64374
ANAPC5	9097.83	0.0109676	0.0953541	0.11502	0.908429	0.975737	0.734448
ANAPC7	4154.2	0.155524	0.191364	0.812714	0.416382	0.783922	0.590067
ANG	73.1857	-0.20893	0.442246	-0.47243	0.63662	0.887129	0.667752
ANGEL1	1414.81	-0.232517	0.190072	-1.22331	0.221213	0.660511	0.497174
ANGEL2	3444.87	-0.10997	0.111107	-0.989762	0.32229	0.733732	0.552288
ANGPT1	989.189	0.450249	0.278942	1.61413	0.106499	0.552662	0.415994
ANGPTL1	83.814	0.0913261	0.526944	0.173313	0.862406	0.962793	0.724705
ANGPTL2	3462.06	0.759199	0.38197	1.98759	0.0468573	0.452359	0.340496
ANGPTL4	323.193	-0.160471	0.376623	-0.426078	0.670051	0.899146	0.676797
ANK1	96.1256	0.510881	0.631676	0.808771	0.418647	0.785573	0.591309
ANK2	1228.46	0.376	0.186792	2.01294	0.0441214	0.4481	0.33729
ANK3	1929.69	-0.189852	0.205397	-0.924314	0.355323	0.753898	0.567467
ANKAR	93.7587	-0.420495	0.269812	-1.55847	0.119121	0.571372	0.430078
ANKDD1A	200.427	0.00314862	0.253903	0.0124009	0.990106	0.997264	0.750652
ANKEF1	569.263	-0.704068	0.39078	-1.8017	0.0715932	0.504879	0.380028
ANKFN1	94.7393	-0.430928	0.58083	-0.741917	0.458137	0.80674	0.607242
ANKFY1	6697.25	-0.0355984	0.128897	-0.276177	0.782412	0.937114	0.705376
ANKH	27382.4	-0.536601	0.613897	-0.87409	0.382069	0.767985	0.578071
ANKHD1-EIF4EBP3	6067.34	0.221673	0.158119	1.40193	0.160935	0.610774	0.459736
ANKHD1	3689.49	-0.299739	0.131463	-2.28003	0.0226062	0.363238	0.273413
ANKIB1	6881.49	-0.0632941	0.104203	-0.607414	0.543576	0.84848	0.63866
ANKLE1	666.511	0.0543515	0.332598	0.163415	0.870192	0.964732	0.726164
ANKLE2	4386.34	-0.0416758	0.201242	-0.207093	0.835937	0.955494	0.719211
ANKMY1	543.732	-0.46052	0.209807	-2.19497	0.0281658	0.396871	0.298729
ANKMY2	764.186	0.048401	0.305849	0.158251	0.874259	0.965938	0.727072
ANKRA2	934.764	-0.0946233	0.182739	-0.517806	0.604594	0.872483	0.656728
ANKRD1	1208.47	0.377884	2.06618	0.18289	0.854884	0.960532	0.723003
ANKRD10	3428.27	-0.392464	0.313761	-1.25084	0.210994	0.655438	0.493355
ANKRD11	20579.7	0.281597	0.223972	1.25729	0.208649	0.653459	0.491866
ANKRD12	2690.43	-0.0461924	0.151653	-0.304593	0.760676	0.929915	0.699957
ANKRD13A	2784.59	0.21602	0.124883	1.72979	0.0836685	0.524834	0.395049
ANKRD13B	2392.96	-0.0287595	0.120468	-0.238731	0.811314	0.946728	0.712613
ANKRD13C	2007.79	0.147496	0.184843	0.797953	0.424898	0.787457	0.592728
ANKRD13D	1871.55	-0.310715	0.205042	-1.51537	0.129679	0.579836	0.436449
ANKRD16	521.97	-0.206468	0.146213	-1.4121	0.15792	0.60936	0.458672
ANKRD17	12599.1	0.0425336	0.100761	0.422123	0.672936	0.900286	0.677655
ANKRD18A	696.814	-0.0313952	0.269606	-0.116448	0.907297	0.975331	0.734142
ANKRD18B	917.409	-0.175376	0.327527	-0.535455	0.592335	0.868389	0.653646
ANKRD19P	54.6141	-0.203792	0.444054	-0.458935	0.646281	0.892823	0.672037
ANKRD23	161.368	-0.686582	0.307382	-2.23364	0.0255066	0.381959	0.287505
ANKRD24	105.784	-0.465335	0.5443	-0.854923	0.392594	0.773496	0.582219
ANKRD26	1293.56	0.184637	0.193878	0.952336	0.340926	0.744848	0.560655
ANKRD27	3273.69	0.0973386	0.148065	0.657402	0.510922	0.829853	0.624639
ANKRD28	6760.12	0.3129	0.326463	0.958454	0.337834	0.743534	0.559666
ANKRD29	279.01	-0.142317	0.433121	-0.328585	0.74247	0.923274	0.694959
ANKRD30A	24.9915	0.421346	1.21372	0.347153	0.728477	0.921024	0.693265
ANKRD31	44.7025	0.135576	0.538896	0.251581	0.801365	0.943893	0.710479
ANKRD33B	1508.47	0.120656	0.87773	0.137464	0.890664	0.971452	0.731223
ANKRD34A	1149.1	-0.379928	0.363831	-1.04424	0.296373	0.718441	0.540778
ANKRD36	571.181	-0.682566	0.167765	-4.06859	4.73e-05	0.0106279	0.00799972
ANKRD36B	369.603	-0.678661	0.239281	-2.83625	0.00456467	0.190612	0.143476
ANKRD36BP1	2013.06	-0.0878189	0.30675	-0.286288	0.774657	0.934181	0.703169
ANKRD36C	715.777	-0.4694	0.270418	-1.73583	0.0825937	0.523086	0.393732
ANKRD37	155.322	-0.0258101	0.286259	-0.0901634	0.928157	0.980888	0.738325
ANKRD39	465.295	0.0692389	0.155094	0.446433	0.655285	0.895877	0.674337
ANKRD40	5863.35	0.217111	0.176325	1.23131	0.218206	0.659039	0.496066
ANKRD42	1515.26	-0.398176	0.134145	-2.96824	0.00299509	0.15979	0.120276
ANKRD44	387.962	-0.266908	0.233205	-1.14453	0.252406	0.684625	0.515325
ANKRD45	180.731	0.593188	0.502347	1.18083	0.237669	0.673318	0.506814
ANKRD46	609.503	-0.0218053	0.2121	-0.102807	0.918116	0.97874	0.736709
ANKRD49	585.85	-0.0239807	0.156419	-0.15331	0.878153	0.966771	0.727699
ANKRD50	11936.5	-0.267564	0.196237	-1.36347	0.172734	0.622112	0.46827
ANKRD52	14948.7	0.0716392	0.128902	0.555765	0.578372	0.861571	0.648514
ANKRD54	2261.21	0.0970316	0.119989	0.808671	0.418704	0.785577	0.591312
ANKRD55	103.546	-0.306044	0.373577	-0.819226	0.412657	0.782211	0.588779
ANKRD6	164.594	0.696201	0.353141	1.97145	0.0486719	0.454322	0.341973
ANKRD61	62.6949	-0.266494	0.36475	-0.730623	0.46501	0.810375	0.609978
ANKRD9	357.436	-0.41474	0.271686	-1.52654	0.126876	0.578566	0.435493
ANKS1A	2633.16	-0.00807307	0.185249	-0.0435796	0.96524	0.991671	0.746442
ANKS1B	57.957	-0.380947	0.738588	-0.515777	0.60601	0.873282	0.657329
ANKS3	922.461	-0.491142	0.153401	-3.20168	0.0013663	0.100737	0.0758255
ANKS6	3618.8	0.0504475	0.198373	0.254306	0.799259	0.943459	0.710152
ANKZF1	1757.07	0.139202	0.108417	1.28395	0.19916	0.644903	0.485426
ANLN	15755	0.250651	0.338721	0.739992	0.459305	0.807291	0.607657
ANO1-AS2	140.108	0.531534	0.570065	0.932409	0.351125	0.751971	0.566016
ANO1	2929.96	0.795517	0.934835	0.85097	0.394786	0.774539	0.583004
ANO10	1639.89	0.443494	0.213803	2.07431	0.0380503	0.42988	0.323575
ANO3	192.359	-0.103983	0.287793	-0.36131	0.717868	0.916144	0.689592
ANO4	360.488	-0.265157	1.06014	-0.250114	0.802499	0.943971	0.710538
ANO5	56.4449	-1.35282	0.584427	-2.31478	0.0206249	0.345521	0.260078
ANO6	7157.21	0.166094	0.192985	0.860657	0.389427	0.772307	0.581324
ANO7	118.121	-0.0673523	0.351495	-0.191617	0.848043	0.958228	0.721268
ANO8	1900.01	-0.124227	0.234843	-0.528978	0.596821	0.869583	0.654545
ANP32A-IT1	181.805	-1.31351	0.428358	-3.06638	0.00216668	0.129964	0.0978253
ANP32A	11602.8	0.316608	0.132845	2.38328	0.0171592	0.324532	0.244279
ANP32B	16312.9	0.188731	0.282801	0.667362	0.504541	0.826506	0.62212
ANP32E	9225.52	0.35789	0.221234	1.61769	0.105728	0.552046	0.415531
ANPEP	12936.8	0.482152	0.706093	0.682845	0.494705	0.822163	0.618851
ANTXR1	6509.03	0.406426	0.235494	1.72585	0.0843753	0.527336	0.396932
ANTXR2	1629.37	0.0438298	0.22316	0.196406	0.844293	0.957825	0.720966
ANXA1	40774.3	0.113729	0.168921	0.673267	0.500777	0.824552	0.620649
ANXA11	10762.4	0.240391	0.148339	1.62055	0.105113	0.552046	0.415531
ANXA2	26594.1	0.311392	0.30977	1.00524	0.314783	0.730399	0.549779
ANXA2P2	1343.66	0.474095	0.395287	1.19937	0.230385	0.667224	0.502227
ANXA2R	83.9276	-0.0926365	0.34198	-0.270883	0.786481	0.939245	0.70698
ANXA4	2170.27	0.200741	0.129596	1.54898	0.121386	0.574081	0.432117
ANXA5	14598.3	0.391121	0.195387	2.00178	0.0453088	0.4481	0.33729
ANXA6	4538.55	-0.198991	0.35777	-0.556198	0.578075	0.861571	0.648514
ANXA7	3290.34	0.101616	0.177865	0.571313	0.567787	0.857458	0.645418
ANXA9	306.237	-0.156324	0.382797	-0.408374	0.682999	0.904879	0.681113
AOC2	140.823	-0.340429	0.326017	-1.04421	0.29639	0.718441	0.540778
AOC3	81.1443	0.0640309	0.543874	0.117731	0.906281	0.975242	0.734075
AOX1	87.4532	0.163335	0.645325	0.253105	0.800187	0.94364	0.710288
AP1AR	1365.98	3.5e-05	0.162492	0.00021541	0.999828	0.999967	0.752687
AP1B1	8999.63	0.120041	0.107788	1.11368	0.265417	0.694819	0.522998
AP1G1	8748.94	0.226682	0.143523	1.57941	0.114242	0.56428	0.424739
AP1G2	939.76	-1.00719	0.279008	-3.6099	0.00030632	0.0401803	0.0302441
AP1M1	9427.43	0.238071	0.117109	2.03289	0.0420634	0.441728	0.332493
AP1M2	98.9725	0.0224707	0.873232	0.0257328	0.97947	0.995361	0.749219
AP1S1	7574.79	0.00330001	0.201469	0.0163797	0.986931	0.996932	0.750402
AP1S2	3904.31	0.0725603	0.2317	0.313165	0.754156	0.927787	0.698356
AP1S3	346.023	-0.206322	0.302609	-0.681811	0.495358	0.822267	0.618929
AP2A1	9062.81	0.0777643	0.105852	0.734651	0.462552	0.808481	0.608552
AP2A2	607.303	-0.138914	0.172615	-0.804763	0.420957	0.786788	0.592224
AP2B1	23554.6	0.217563	0.220795	0.985363	0.324446	0.7352	0.553393
AP2M1	14916.5	0.161668	0.165736	0.975454	0.329335	0.738274	0.555707
AP2S1	8532.94	0.167764	0.106748	1.57159	0.116045	0.566462	0.426382
AP3B1	6167.06	0.188903	0.0957069	1.97376	0.0484086	0.453605	0.341434
AP3B2	257.461	0.0553221	0.269598	0.205202	0.837414	0.955649	0.719327
AP3D1	12123.1	0.147071	0.0868393	1.6936	0.0903409	0.536005	0.403457
AP3M1	3629.6	0.100226	0.0940346	1.06584	0.286496	0.71147	0.535531
AP3M2	1299.23	0.0851735	0.221738	0.384117	0.700891	0.912897	0.687148
AP3S1	3680.85	0.643941	0.365288	1.76283	0.0779294	0.51344	0.386472
AP3S2	3251.6	-0.000254505	0.137114	-0.00185615	0.998519	0.999284	0.752172
AP4B1-AS1	75.1193	-0.732493	0.611916	-1.19705	0.231288	0.668458	0.503155
AP4B1	1503.48	0.52114	0.255214	2.04197	0.0411541	0.438358	0.329957
AP4E1	2181.49	0.178521	0.175733	1.01587	0.309693	0.727536	0.547624
AP4M1	1264.79	0.098489	0.127156	0.774551	0.438605	0.795092	0.598474
AP4S1	306.592	0.0871947	0.255698	0.341007	0.733099	0.922048	0.694036
AP5B1	4111.31	-0.168363	0.148695	-1.13227	0.257522	0.68989	0.519288
AP5M1	975.102	0.0510396	0.178139	0.286516	0.774483	0.934181	0.703169
AP5S1	1035.21	0.2079	0.135747	1.53153	0.125638	0.577058	0.434358
AP5Z1	1390.72	0.00351846	0.123558	0.0284763	0.977282	0.994573	0.748626
APAF1	2744.64	-0.347732	0.215457	-1.61393	0.106542	0.552662	0.415994
APBA2	406.386	0.40287	0.328008	1.22823	0.21936	0.659532	0.496437
APBA3	808.19	-0.0948476	0.186141	-0.509546	0.610369	0.875597	0.659071
APBB1	1279.89	-0.172668	0.148519	-1.1626	0.244993	0.678504	0.510718
APBB2	2103.16	-0.000136757	0.329944	-0.000414486	0.999669	0.999952	0.752675
APBB3	899.953	-0.179885	0.203807	-0.882627	0.377438	0.766417	0.57689
APC	6205.84	0.182506	0.125613	1.45292	0.146246	0.597044	0.449401
APC2	678.81	-0.913286	0.459828	-1.98615	0.047017	0.452359	0.340496
APEH	7464.32	0.026648	0.282807	0.0942266	0.924929	0.979744	0.737464
APEX1	7418.14	0.280654	0.12408	2.26187	0.0237052	0.370797	0.279103
APEX2	3393.87	0.369902	0.189723	1.94969	0.0512125	0.458849	0.345381
APH1A	9339.32	0.0189298	0.110401	0.171465	0.863858	0.963411	0.72517
APH1B	319.145	-0.017334	0.287943	-0.0601994	0.951997	0.988111	0.743762
API5	8901.57	0.271661	0.194488	1.3968	0.162473	0.612573	0.46109
APIP	1675.97	-0.0164483	0.173056	-0.0950462	0.924278	0.979633	0.737381
APITD1-CORT	159.964	0.206457	0.233633	0.88368	0.376869	0.766417	0.57689
APITD1	1391.79	0.33203	0.18348	1.80963	0.0703538	0.50278	0.378448
APLN	81.4104	-0.00997167	0.961566	-0.0103702	0.991726	0.997264	0.750652
APLP1	705.28	-0.689897	0.355169	-1.94245	0.0520832	0.460363	0.34652
APLP2	20625.7	0.148102	0.3468	0.427053	0.66934	0.899146	0.676797
APMAP	8363.32	-0.109649	0.120757	-0.908013	0.363871	0.75861	0.571014
APOA1BP	6191.56	0.118149	0.143023	0.826084	0.408757	0.781074	0.587923
APOBEC3B	1335.51	0.427774	0.363773	1.17594	0.23962	0.674554	0.507744
APOBEC3C	2020.29	0.194722	0.271009	0.718507	0.472445	0.814211	0.612865
APOBEC3D	679.976	0.0653245	0.302455	0.215981	0.829003	0.95276	0.717153
APOBEC3F	845.731	0.162971	0.329521	0.494569	0.620904	0.880812	0.662997
APOBEC3G	1387.17	-0.495151	0.794086	-0.623547	0.532925	0.841168	0.633156
APOC1	214.304	-0.292249	0.263356	-1.10971	0.267125	0.696907	0.524569
APOD	504.303	-0.457957	1.19264	-0.383987	0.700988	0.912897	0.687148
APOE	725.881	-0.82057	0.867344	-0.946072	0.344112	0.747124	0.562368
APOL1	257.236	-0.11874	0.67764	-0.175226	0.860902	0.962632	0.724584
APOL2	869.883	0.17413	0.166857	1.04359	0.296675	0.718887	0.541114
APOL3	143.792	0.335534	0.378822	0.885731	0.375762	0.765806	0.576431
APOL6	2312.16	-0.0692827	0.346385	-0.200016	0.841468	0.956619	0.720058
APOLD1	247.849	-0.435396	0.32736	-1.33002	0.183511	0.632681	0.476226
APOO	1381.95	0.00798179	0.124395	0.0641651	0.948839	0.987442	0.743259
APOOL	1974.88	-0.0774197	0.116599	-0.663982	0.506702	0.827995	0.623241
APOPT1	1004.5	-0.00197255	0.202075	-0.0097615	0.992212	0.997264	0.750652
APP	36621.9	-0.0110005	0.185559	-0.059283	0.952727	0.988285	0.743893
APPBP2	2587.82	-0.142254	0.144673	-0.983281	0.325469	0.735527	0.553639
APPL1	5142.97	0.330906	0.218128	1.51702	0.129261	0.579013	0.435829
APPL2	3148.85	0.119097	0.119665	0.995259	0.319611	0.733031	0.55176
APRT	5077.63	0.00805648	0.156522	0.0514719	0.958949	0.990198	0.745333
APTR	241.444	-0.360711	0.343097	-1.05134	0.293103	0.716238	0.53912
APTX	1913.85	0.222937	0.173586	1.28431	0.199035	0.644903	0.485426
AQP1	184.649	-0.140649	0.463858	-0.303216	0.761725	0.930176	0.700154
AQP11	107.637	-0.251589	0.279979	-0.898602	0.368865	0.762673	0.574073
AQP3	356.681	-1.07881	0.365517	-2.95146	0.00316276	0.162373	0.12222
AQP4	174.046	-0.0681837	0.30454	-0.22389	0.822843	0.950815	0.715689
AQP7P1	148.901	-1.54369	0.59853	-2.57913	0.00990492	0.266298	0.200445
AQP7P3	157.38	-0.301895	0.491286	-0.6145	0.538885	0.845165	0.636165
AQR	6104.58	0.195808	0.163179	1.19996	0.230156	0.667224	0.502227
AR	795.058	0.165914	0.302142	0.549126	0.582919	0.863674	0.650097
ARAF	4769.55	0.118104	0.127747	0.924513	0.355219	0.753898	0.567467
ARAP1	6616.08	-0.287641	0.218876	-1.31417	0.188788	0.636126	0.478819
ARAP2	1026.24	-0.488481	0.172943	-2.82452	0.00473517	0.194038	0.146054
ARAP3	5148.84	0.0713908	0.104841	0.680946	0.495906	0.822352	0.618994
ARC	102.282	-0.867896	0.373413	-2.32423	0.0201134	0.341764	0.25725
ARCN1	21716.1	0.221513	0.0792151	2.79635	0.0051684	0.197045	0.148318
AREG	112.837	0.184499	0.383039	0.481672	0.630039	0.885082	0.666211
AREL1	3938.72	0.0900856	0.0925173	0.973716	0.330197	0.738534	0.555903
ARF1	29581.3	0.170103	0.0946647	1.7969	0.0723513	0.505956	0.380839
ARF3	13995.8	0.0563999	0.119302	0.472749	0.636392	0.887129	0.667752
ARF4	9749.93	0.400812	0.194419	2.06159	0.0392469	0.43135	0.324682
ARF5	4012.32	-0.0732398	0.146298	-0.500622	0.616637	0.879449	0.661971
ARF6	6967.98	0.0678962	0.167069	0.406396	0.684452	0.904931	0.681152
ARFGAP1	6560.67	-0.0876556	0.129109	-0.678925	0.497185	0.823352	0.619746
ARFGAP2	4761.47	0.0173466	0.086336	0.200919	0.840762	0.956488	0.719959
ARFGAP3	2114.76	-0.0361915	0.16095	-0.224862	0.822086	0.95053	0.715475
ARFGEF1	5669.85	-0.0379632	0.0854987	-0.444021	0.657028	0.896158	0.674548
ARFGEF2	9351.69	-0.0230503	0.126038	-0.182884	0.854889	0.960532	0.723003
ARFGEF3	393.486	-0.147026	1.26332	-0.11638	0.907351	0.975331	0.734142
ARFIP1	2107.31	0.00114599	0.11457	0.0100026	0.992019	0.997264	0.750652
ARFIP2	3653.18	-0.0282507	0.126535	-0.223265	0.823329	0.951045	0.715862
ARFRP1	2182.98	0.010614	0.165978	0.0639483	0.949011	0.987446	0.743262
ARG2	983.757	0.133752	0.229939	0.581685	0.560779	0.854576	0.643249
ARGLU1	4957.46	-0.283743	0.17852	-1.58942	0.111965	0.561652	0.422761
ARHGAP1	7715.13	0.278348	0.159165	1.7488	0.080325	0.517143	0.389259
ARHGAP10	1158.03	0.165471	0.125689	1.31651	0.188002	0.635836	0.478601
ARHGAP11A	728.792	0.637743	0.473511	1.34684	0.178032	0.629295	0.473677
ARHGAP12	7123.75	-0.0495365	0.136469	-0.362987	0.716615	0.916075	0.68954
ARHGAP17	3892.69	0.401573	0.180945	2.21931	0.0264659	0.38723	0.291472
ARHGAP18	2405.63	0.0334064	0.397657	0.0840082	0.93305	0.982684	0.739677
ARHGAP19	3458.59	0.328319	0.225743	1.45439	0.145838	0.597044	0.449401
ARHGAP21	4493.29	0.194041	0.156299	1.24148	0.21443	0.656745	0.494339
ARHGAP22	251.291	-0.257466	0.337037	-0.763912	0.44492	0.79806	0.600708
ARHGAP23	758.525	-0.460969	0.444468	-1.03713	0.299677	0.720814	0.542565
ARHGAP24	394.321	0.0260058	0.345799	0.0752049	0.940052	0.984929	0.741367
ARHGAP25	116.94	-0.018025	0.546005	-0.0330126	0.973665	0.993598	0.747892
ARHGAP26	2434.13	-0.84328	0.27368	-3.08126	0.00206127	0.127347	0.0958557
ARHGAP28	38.3211	-0.537988	1.13831	-0.472619	0.636485	0.887129	0.667752
ARHGAP29	1102.21	1.47062	1.01021	1.45575	0.145461	0.597027	0.449389
ARHGAP30	199.364	-0.208494	0.296775	-0.702531	0.482348	0.818165	0.615842
ARHGAP31	3930.72	0.775844	0.637737	1.21656	0.223772	0.663258	0.499241
ARHGAP32	3350.93	-0.11357	0.226443	-0.501539	0.615992	0.87903	0.661656
ARHGAP33	641.835	-0.154297	0.22865	-0.674815	0.499793	0.824552	0.620649
ARHGAP35	12625.7	0.367756	0.153054	2.40279	0.0162706	0.318337	0.239616
ARHGAP39	933.086	-0.301402	0.232562	-1.29601	0.194972	0.640971	0.482466
ARHGAP4	3262.21	-0.270111	0.265773	-1.01632	0.309475	0.727536	0.547624
ARHGAP42	357.284	-0.5608	0.466554	-1.202	0.229362	0.666797	0.501906
ARHGAP44	330.655	-0.584126	0.35545	-1.64334	0.100312	0.549369	0.413516
ARHGAP5-AS1	744.39	-0.29754	0.385351	-0.772126	0.44004	0.795861	0.599053
ARHGAP5	9962.4	-0.0501669	0.20959	-0.239357	0.810829	0.946569	0.712493
ARHGAP9	126.671	-0.484404	0.630984	-0.767696	0.442668	0.797424	0.60023
ARHGDIA	22075.5	0.285764	0.193099	1.47988	0.138905	0.588437	0.442923
ARHGDIB	116.983	-0.124759	0.924739	-0.134913	0.892681	0.97221	0.731793
ARHGDIG	85.1501	-1.38085	0.744155	-1.8556	0.0635107	0.485228	0.365237
ARHGEF1	12609.2	0.00556405	0.145094	0.0383478	0.96941	0.991942	0.746646
ARHGEF10	158.523	0.12569	0.875903	0.143498	0.885897	0.969197	0.729525
ARHGEF10L	621.02	-0.422387	0.322783	-1.30858	0.190677	0.637349	0.479739
ARHGEF11	10857.1	0.0826958	0.136496	0.605848	0.544616	0.849353	0.639317
ARHGEF12	12947.1	0.0107723	0.11079	0.0972313	0.922543	0.979241	0.737085
ARHGEF17	1316.9	-0.58851	0.280369	-2.09906	0.035812	0.41996	0.316108
ARHGEF18	3948.9	0.0386621	0.15905	0.243082	0.807942	0.945147	0.711423
ARHGEF19	745.546	0.0521476	0.244223	0.213525	0.830918	0.95366	0.717831
ARHGEF2	18607.7	0.0230126	0.317976	0.0723721	0.942306	0.985595	0.741868
ARHGEF25	2103.83	0.0314486	0.218156	0.144156	0.885377	0.969053	0.729417
ARHGEF28	2276.65	0.0938113	0.793973	0.118154	0.905945	0.975042	0.733925
ARHGEF3	1430.85	1.50301	0.391914	3.83504	0.000125542	0.021061	0.0158529
ARHGEF37	336.733	-0.0934278	0.464941	-0.200946	0.840741	0.956488	0.719959
ARHGEF39	1344.83	0.0639111	0.171878	0.37184	0.710012	0.914504	0.688357
ARHGEF4	384.65	-0.424835	0.606295	-0.700706	0.483486	0.818884	0.616383
ARHGEF40	4845.36	-0.207203	0.310606	-0.667094	0.504712	0.826551	0.622154
ARHGEF6	2038.88	-0.198285	0.369384	-0.536798	0.591407	0.867541	0.653008
ARHGEF7	5505.36	0.230326	0.109115	2.11086	0.0347842	0.418538	0.315038
ARHGEF9	1649.35	0.165298	0.282833	0.584436	0.558927	0.854474	0.643172
ARID1A	16231.9	0.265624	0.0949046	2.79885	0.00512842	0.197045	0.148318
ARID1B	6285.95	0.0595896	0.0739991	0.805274	0.420662	0.786747	0.592193
ARID2	4602.4	0.12691	0.145575	0.871788	0.383324	0.768554	0.578499
ARID3A	450.102	-0.0101567	0.241602	-0.0420391	0.966468	0.991759	0.746508
ARID3B	397.329	-0.432266	0.338925	-1.2754	0.202167	0.646421	0.486568
ARID4A	1128.45	-0.0204031	0.179104	-0.113918	0.909303	0.975847	0.734531
ARID4B	5587.69	0.195727	0.107396	1.82247	0.0683832	0.50148	0.37747
ARID5A	331.15	-0.438736	0.308303	-1.42307	0.154717	0.60569	0.455909
ARID5B	2362.7	-0.172026	0.303103	-0.567549	0.570342	0.858303	0.646054
ARIH1	5695.23	-0.0164121	0.100055	-0.164031	0.869707	0.964732	0.726164
ARIH2	7066.52	0.193299	0.183765	1.05188	0.292853	0.716094	0.539012
ARIH2OS	82.9368	-0.0654697	0.348558	-0.18783	0.85101	0.959574	0.722282
ARL1	3662.2	0.161411	0.117026	1.37927	0.167811	0.616541	0.464077
ARL10	117.06	-2.04384	0.668668	-3.05659	0.00223871	0.133661	0.100608
ARL13B	1651.93	0.222978	0.163339	1.36512	0.172214	0.621904	0.468114
ARL14EP	1220.25	-0.0746952	0.154148	-0.484567	0.627984	0.883935	0.665348
ARL14EPL	19.6783	0.13558	0.515521	0.262995	0.792554	0.941131	0.708399
ARL15	1141.9	0.113009	0.320795	0.352278	0.72463	0.919328	0.691988
ARL16	1212.16	-0.206573	0.123736	-1.66946	0.0950255	0.542452	0.40831
ARL17A	201.078	-0.512412	0.210291	-2.43668	0.0148226	0.31144	0.234424
ARL2	5228.52	0.323682	0.161726	2.00143	0.0453462	0.4481	0.33729
ARL2BP	3354.56	0.0317138	0.219173	0.144697	0.88495	0.969053	0.729417
ARL3	1777.6	0.0794776	0.111326	0.713919	0.475277	0.815164	0.613583
ARL4A	820.406	0.367098	0.332462	1.10418	0.269515	0.698254	0.525583
ARL4C	1529.74	0.00550416	0.690856	0.00796716	0.993643	0.99752	0.750844
ARL4D	523.764	-0.100874	0.266335	-0.378749	0.704874	0.913987	0.687968
ARL5A	2077.02	0.142928	0.1619	0.882817	0.377335	0.766417	0.57689
ARL5B	1798.36	-0.0966957	0.148619	-0.65063	0.515285	0.832691	0.626776
ARL6	549.714	0.0835196	0.224928	0.371317	0.710401	0.914504	0.688357
ARL6IP1	10349.9	0.118825	0.214262	0.554579	0.579183	0.861707	0.648617
ARL6IP4	6288.08	0.103327	0.110961	0.931197	0.351752	0.75225	0.566227
ARL6IP5	3550.13	0.0422937	0.178638	0.236757	0.812845	0.946892	0.712736
ARL6IP6	933.986	-0.00125238	0.212002	-0.00590738	0.995287	0.998213	0.751366
ARL8A	2069.97	-0.00636973	0.189383	-0.0336342	0.973169	0.993304	0.747671
ARL8B	3706.19	0.320574	0.221265	1.44883	0.147386	0.598712	0.450657
ARMC1	3585.57	0.200845	0.207786	0.966597	0.333746	0.740639	0.557487
ARMC10	1578.96	-0.184196	0.215853	-0.853337	0.393473	0.77391	0.582531
ARMC2	124.473	0.165471	0.253853	0.651838	0.514506	0.83218	0.626391
ARMC5	1996.2	-0.0988237	0.0921455	-1.07247	0.283507	0.710886	0.535092
ARMC6	5260.18	0.13197	0.148891	0.886354	0.375427	0.765454	0.576165
ARMC7	984.33	-0.0542655	0.210005	-0.258401	0.796098	0.942586	0.709495
ARMC8	2060.59	0.24634	0.188367	1.30776	0.190954	0.637383	0.479765
ARMC9	1840.34	0.106081	0.142587	0.743971	0.456894	0.806118	0.606774
ARMCX3	1430.85	-0.425903	0.294017	-1.44857	0.147459	0.598712	0.450657
ARMCX4	391.593	0.0138845	1.2631	0.0109924	0.99123	0.997264	0.750652
ARMCX5-GPRASP2	382.796	0.07095	0.283198	0.250531	0.802177	0.943971	0.710538
ARMCX5	654.262	-0.10239	0.238827	-0.428719	0.668128	0.899051	0.676726
ARMCX6	324.023	0.061998	0.395574	0.156729	0.875458	0.965938	0.727072
ARMT1	1496.64	0.0988613	0.143322	0.689787	0.490328	0.821384	0.618265
ARNT	3361.59	-0.0472084	0.128926	-0.366166	0.714241	0.915397	0.689029
ARNT2	15140.8	-0.385855	0.599081	-0.644078	0.519525	0.836027	0.629287
ARNTL	611.485	0.290677	0.215452	1.34914	0.177291	0.628627	0.473175
ARNTL2	1260.8	0.472029	0.763019	0.618633	0.536158	0.843434	0.634862
ARPC1A	9117.05	0.230612	0.178395	1.2927	0.196115	0.641895	0.483162
ARPC1B	12695.9	-0.256957	0.279281	-0.920068	0.357537	0.754808	0.568152
ARPC2	9825.95	0.181129	0.119528	1.51536	0.129681	0.579836	0.436449
ARPC3	9814.09	0.147137	0.0942075	1.56184	0.118326	0.569346	0.428553
ARPC4	7322.81	0.289478	0.176482	1.64027	0.10095	0.549831	0.413864
ARPC5	10427.8	0.258229	0.129929	1.98746	0.0468714	0.452359	0.340496
ARPC5L	2990.6	-0.314246	0.194381	-1.61665	0.105953	0.552046	0.415531
ARPIN	3561.38	0.0363139	0.169048	0.214814	0.829912	0.953127	0.717429
ARPP19	12952.2	0.115962	0.164934	0.703078	0.482007	0.818131	0.615816
ARPP21	801.408	0.800569	0.809395	0.989096	0.322616	0.733953	0.552455
ARRB1	1626.03	-0.885195	0.395772	-2.23663	0.0253105	0.380356	0.286298
ARRB2	1895.93	0.159691	0.199101	0.80206	0.422518	0.787196	0.592531
ARRDC1-AS1	911.393	-0.253365	0.283022	-0.895214	0.370673	0.763542	0.574726
ARRDC1	1291.79	-0.443557	0.329371	-1.34668	0.178084	0.629295	0.473677
ARRDC2	1987.92	-0.27986	0.195112	-1.43435	0.151471	0.601973	0.453112
ARRDC3-AS1	42.586	-0.501539	0.496754	-1.00963	0.312671	0.729371	0.549006
ARRDC3	3300	-0.476463	0.227597	-2.09345	0.0363088	0.421301	0.317118
ARRDC4	658.041	-1.01107	0.306085	-3.30323	0.000955768	0.0830052	0.062479
ARSA	864.976	-0.429382	0.38972	-1.10177	0.270562	0.699558	0.526565
ARSB	2113.1	0.0623694	0.184081	0.338815	0.734749	0.922048	0.694036
ARSD	1518.59	0.265504	0.118881	2.23336	0.0255251	0.381959	0.287505
ARSE	766.123	-0.0315244	0.346513	-0.0909762	0.927512	0.980683	0.738171
ARSG	316.014	0.168931	0.558071	0.302706	0.762114	0.930271	0.700225
ARSJ	1704.07	0.0447091	0.39334	0.113665	0.909503	0.975847	0.734531
ARSK	610.41	-0.299562	0.169381	-1.76857	0.0769661	0.512776	0.385972
ART3	2284.69	-1.02289	0.812632	-1.25874	0.208124	0.652744	0.491328
ARTN	66.8115	-0.316044	0.473678	-0.667213	0.504636	0.826522	0.622132
ARV1	1433.92	0.0970555	0.15149	0.640674	0.521735	0.836836	0.629896
ARVCF	248.722	-0.882892	0.34846	-2.5337	0.0112866	0.279561	0.210429
ASAH1	1571.01	-0.470393	0.213758	-2.20059	0.027765	0.396211	0.298232
ASAH2B	67.2583	0.77714	0.597087	1.30155	0.19307	0.639151	0.481096
ASAP1	7233.9	0.140798	0.159414	0.883223	0.377116	0.766417	0.57689
ASAP2	4640.19	0.351248	0.241106	1.45682	0.145167	0.596729	0.449165
ASAP3	2108.29	0.25644	0.812373	0.315668	0.752254	0.926989	0.697755
ASB1	2785.77	-0.331714	0.180845	-1.83425	0.0666173	0.496073	0.373399
ASB13	1323.92	-0.134662	0.237505	-0.566985	0.570724	0.858511	0.64621
ASB14	52.8806	-0.212843	0.362702	-0.586825	0.557321	0.853888	0.642731
ASB16-AS1	531.636	0.0834552	0.250701	0.332887	0.739219	0.922372	0.694279
ASB16	117.79	-0.467078	0.386807	-1.20752	0.227231	0.664794	0.500398
ASB3	1458.21	-0.0974466	0.144149	-0.676012	0.499033	0.824129	0.620331
ASB6	4413.88	-0.161262	0.153771	-1.04872	0.294309	0.716904	0.539621
ASB7	1535.85	-0.149411	0.158003	-0.945617	0.344344	0.747224	0.562444
ASB8	1570.63	0.0733005	0.138759	0.528259	0.597319	0.869962	0.65483
ASB9	940.988	0.308368	0.249046	1.2382	0.215643	0.657507	0.494913
ASCC1	1320.13	0.392057	0.189616	2.06764	0.038674	0.430528	0.324063
ASCC2	3403.78	-0.0523648	0.0931022	-0.562444	0.573814	0.859567	0.647005
ASCC3	6370.08	0.123363	0.176011	0.700886	0.483374	0.818884	0.616383
ASF1A	1873.57	0.00832705	0.129794	0.0641558	0.948846	0.987442	0.743259
ASF1B	4148.28	0.528583	0.251004	2.10587	0.0352155	0.41991	0.316071
ASGR1	62.3216	-0.501751	0.429694	-1.16769	0.242931	0.677221	0.509751
ASH1L-AS1	186.672	-0.638343	0.273744	-2.3319	0.0197061	0.340434	0.256248
ASH1L	11402	-0.0567737	0.101844	-0.557458	0.577214	0.861379	0.64837
ASH2L	4569.64	0.239258	0.0859532	2.78359	0.00537614	0.19826	0.149232
ASIC1	1260.51	0.0218523	0.213736	0.10224	0.918566	0.97874	0.736709
ASIC2	63.6492	0.599955	0.567649	1.05691	0.290552	0.714692	0.537957
ASIC3	173.205	-0.0137666	0.319166	-0.043133	0.965596	0.991671	0.746442
ASL	1648.72	0.0312049	0.139643	0.223463	0.823175	0.950944	0.715786
ASMTL	171.543	-0.0745892	0.904219	-0.0824901	0.934257	0.983004	0.739918
ASNA1	4484.35	0.191414	0.142718	1.34121	0.179853	0.630668	0.474711
ASNS	7308.93	0.598085	0.697088	0.857975	0.390906	0.77308	0.581906
ASNSD1	1983.23	0.171587	0.228238	0.751791	0.452177	0.803339	0.604682
ASPH	17031.3	0.0720299	0.211548	0.34049	0.733487	0.922048	0.694036
ASPHD1	620.554	-0.343292	0.291128	-1.17918	0.238327	0.673661	0.507072
ASPHD2	338.619	0.0402586	0.198981	0.202323	0.839664	0.956391	0.719886
ASPM	21425.9	0.16435	0.243873	0.673914	0.500366	0.824552	0.620649
ASPSCR1	1523.19	0.0757598	0.121243	0.624858	0.532064	0.841023	0.633047
ASRGL1	356.783	0.00953264	0.309643	0.0307859	0.97544	0.994265	0.748394
ASTE1	474.33	0.271531	0.207927	1.30589	0.191589	0.637998	0.480228
ASTN1	82.975	-0.0156088	0.386108	-0.040426	0.967753	0.991932	0.746638
ASTN2	382.116	0.000997615	0.317973	0.00313742	0.997497	0.999151	0.752072
ASUN	4708.85	0.00310022	0.134549	0.0230416	0.981617	0.996069	0.749752
ASXL1	8330.84	-0.0555824	0.166045	-0.334742	0.737819	0.922048	0.694036
ASXL2	6206.68	0.129858	0.0786709	1.65065	0.0988097	0.546814	0.411593
ATAD1	5601.31	-0.15566	0.114415	-1.36048	0.173679	0.623062	0.468986
ATAD2	8584.45	0.362665	0.280295	1.29387	0.19571	0.641461	0.482835
ATAD2B	1264.1	-0.222581	0.186396	-1.19413	0.232427	0.670145	0.504426
ATAD3A	6027.09	0.276715	0.152328	1.81657	0.0692826	0.501947	0.377821
ATAD3B	3239	-0.0942991	0.280701	-0.335941	0.736915	0.922048	0.694036
ATAD5	2711.73	0.30897	0.254359	1.2147	0.224481	0.663838	0.499678
ATCAY	39.063	-2.11717	0.488389	-4.33501	1.46e-05	0.00542938	0.00408675
ATE1	3933.92	0.0820986	0.129171	0.635578	0.525052	0.838365	0.631047
ATF1	1815.5	0.0339985	0.241397	0.14084	0.887996	0.970168	0.730256
ATF2	2199.85	-0.0753523	0.132032	-0.570714	0.568194	0.857556	0.645492
ATF3	424.162	0.0595229	1.10005	0.0541094	0.956848	0.989749	0.744995
ATF4	16583.3	0.49621	0.263353	1.8842	0.0595379	0.47865	0.360285
ATF5	1349.56	0.104871	0.338296	0.309997	0.756563	0.928229	0.698688
ATF6	6943.88	0.0395579	0.093201	0.424437	0.671247	0.899146	0.676797
ATF6B	257.124	-1.16518	0.369251	-3.15552	0.00160211	0.105979	0.0797712
ATF7	2984.86	0.0802038	0.121383	0.660752	0.508771	0.829109	0.62408
ATF7IP	9296.1	0.098033	0.163972	0.597866	0.549929	0.850705	0.640335
ATF7IP2	345.73	-0.661906	0.294979	-2.24391	0.0248383	0.376457	0.283363
ATG10	500.184	0.100128	0.203509	0.492007	0.622715	0.881494	0.663511
ATG101	3988.19	0.0247263	0.149355	0.165554	0.868508	0.964556	0.726032
ATG12	3525.57	-0.177184	0.657985	-0.269283	0.787712	0.939414	0.707107
ATG13	7522.91	0.227356	0.108318	2.09896	0.0358207	0.41996	0.316108
ATG14	1178.86	-0.367068	0.124698	-2.94364	0.00324373	0.16341	0.123001
ATG16L1	2502.52	-0.136734	0.110912	-1.23282	0.217645	0.658469	0.495637
ATG16L2	471.274	-0.720238	0.336176	-2.14244	0.0321581	0.409071	0.307913
ATG2A	2970.57	-0.2047	0.145247	-1.40932	0.158741	0.60936	0.458672
ATG2B	3022.83	-0.0450362	0.162315	-0.277461	0.781426	0.936811	0.705148
ATG3	2897.69	0.434464	0.214778	2.02285	0.0430884	0.444901	0.334882
ATG4A	487.776	0.273217	0.174392	1.56668	0.117188	0.568549	0.427953
ATG4B	2456.58	-0.0411407	0.158822	-0.259036	0.795607	0.942478	0.709414
ATG4C	1026.66	0.211418	0.196211	1.07751	0.281255	0.708138	0.533023
ATG4D	1945.17	-0.126095	0.134427	-0.938019	0.348235	0.751056	0.565328
ATG5	1413.54	0.110841	0.248437	0.446155	0.655485	0.895989	0.674421
ATG7	2182	0.344308	0.246497	1.39681	0.162471	0.612573	0.46109
ATG9A	4200.63	0.0733818	0.177008	0.414567	0.678459	0.90289	0.679615
ATHL1	1384.71	-1.07773	0.425498	-2.53287	0.0113134	0.279561	0.210429
ATIC	9419.74	0.25294	0.141746	1.78446	0.0743488	0.509053	0.38317
ATL1	72.9453	0.224725	0.291953	0.769728	0.441461	0.797038	0.599939
ATL2	3732.32	-0.0445297	0.155347	-0.286647	0.774383	0.934181	0.703169
ATL3	5335.67	-0.0145229	0.117846	-0.123236	0.90192	0.97455	0.733555
ATM	8339.95	-0.0190799	0.244959	-0.0778901	0.937915	0.984147	0.740778
ATMIN	4678.34	-0.0458738	0.124038	-0.369838	0.711503	0.914808	0.688586
ATN1	18925.3	0.328173	0.156133	2.10188	0.035564	0.41996	0.316108
ATOH8	947.224	0.188273	0.449712	0.418652	0.675471	0.901392	0.678487
ATOX1	3732.74	0.221907	0.2947	0.752992	0.451455	0.802863	0.604324
ATP10A	729.712	0.390815	0.571358	0.684012	0.493968	0.822079	0.618788
ATP10B	974.867	-0.762467	1.02241	-0.745755	0.455816	0.805462	0.60628
ATP10D	1494.63	-0.118354	0.129707	-0.912477	0.361518	0.757387	0.570093
ATP11A	7734.48	0.234418	0.275874	0.849728	0.395476	0.774787	0.583191
ATP11B	5727.46	-0.0585728	0.132673	-0.441484	0.658863	0.896297	0.674652
ATP11C	2014.59	-0.0439634	0.119724	-0.367205	0.713466	0.915393	0.689026
ATP13A1	10437.3	-0.123083	0.130689	-0.941805	0.346293	0.749785	0.564371
ATP13A2	5821.3	-0.104851	0.19424	-0.539801	0.589334	0.866939	0.652554
ATP13A3	10166.3	0.0187901	0.166712	0.11271	0.91026	0.975883	0.734558
ATP1A1-AS1	147.828	-0.0128336	0.241538	-0.0531327	0.957626	0.990079	0.745243
ATP1A1	69126.5	0.123034	0.15837	0.776876	0.437232	0.794378	0.597937
ATP1A2	141.414	-1.59151	0.730459	-2.17878	0.0293481	0.401641	0.30232
ATP1A3	46.8955	-1.09786	0.695635	-1.57822	0.114516	0.56428	0.424739
ATP1B1	3412	0.209361	0.21117	0.991434	0.321474	0.733086	0.551802
ATP1B2	311.347	-1.87497	0.651405	-2.87835	0.00399767	0.180226	0.135658
ATP1B3	9874.54	0.216185	0.197945	1.09214	0.27477	0.703165	0.52928
ATP2A1-AS1	289.119	0.365076	0.213383	1.7109	0.0871004	0.532151	0.400556
ATP2A1	184.25	-0.112235	0.419654	-0.267446	0.789126	0.940053	0.707588
ATP2A2	33674.1	0.223221	0.142032	1.57162	0.116039	0.566462	0.426382
ATP2A3	154.461	-0.420783	0.844785	-0.498094	0.618418	0.87999	0.662378
ATP2B1	6326.04	-0.16257	0.135768	-1.19741	0.231147	0.668324	0.503055
ATP2B4	26010	-0.323131	0.42117	-0.767222	0.44295	0.797424	0.60023
ATP2C1	5964.82	0.125417	0.19405	0.646309	0.518079	0.834987	0.628504
ATP5A1	20649.5	0.0436285	0.099544	0.438283	0.661181	0.896564	0.674854
ATP5B	41417.6	0.126849	0.114669	1.10622	0.268633	0.697811	0.52525
ATP5C1	5862.17	0.0736367	0.0935981	0.786733	0.431438	0.790941	0.59535
ATP5D	3596.58	0.0917724	0.11878	0.772624	0.439745	0.795531	0.598805
ATP5E	10220.1	-0.392456	0.327036	-1.20004	0.230124	0.667224	0.502227
ATP5F1	10118.5	0.289769	0.143818	2.01483	0.0439229	0.447827	0.337084
ATP5G1	2906.54	0.373372	0.144784	2.57882	0.00991374	0.266298	0.200445
ATP5G2	8191.27	0.187269	0.112675	1.66203	0.0965075	0.543421	0.409039
ATP5G3	5625.35	0.133508	0.098461	1.35595	0.175116	0.626149	0.471309
ATP5H	4138.83	0.251524	0.0980629	2.56493	0.0103198	0.269084	0.202542
ATP5I	2242.59	-0.0036657	0.180948	-0.0202583	0.983837	0.996069	0.749752
ATP5J	3731.01	0.165599	0.11249	1.47212	0.140989	0.590967	0.444827
ATP5J2	4268.73	0.301642	0.0942906	3.19907	0.00137872	0.100849	0.0759104
ATP5L	4935.43	0.0292035	0.122899	0.237621	0.812175	0.946768	0.712643
ATP5O	4021.65	0.217101	0.108495	2.00103	0.0453891	0.4481	0.33729
ATP5S	522.166	0.0542493	0.16173	0.335431	0.7373	0.922048	0.694036
ATP5SL	2418.15	0.119811	0.117628	1.01856	0.30841	0.72725	0.547409
ATP6AP1	5621.54	-0.228141	0.200348	-1.13872	0.254819	0.687219	0.517278
ATP6AP1L	72.1075	0.349317	0.323322	1.0804	0.279964	0.707675	0.532675
ATP6AP2	6201.33	-0.390927	0.198916	-1.96528	0.0493816	0.455701	0.343011
ATP6V0A1	2854.48	0.243327	0.15401	1.57995	0.114119	0.56428	0.424739
ATP6V0A2	1839.55	0.154835	0.117724	1.31524	0.188431	0.636005	0.478728
ATP6V0A4	662.738	-1.26996	0.393026	-3.23124	0.00123253	0.0954158	0.0718205
ATP6V0B	4819.3	0.0782031	0.093965	0.832258	0.405263	0.779848	0.587
ATP6V0C	7168.55	0.430644	0.17157	2.51002	0.0120723	0.286756	0.215844
ATP6V0D1	3097.07	0.262533	0.14949	1.75619	0.0790564	0.515479	0.388006
ATP6V0E1	2300.91	0.158438	0.112843	1.40405	0.160303	0.610341	0.459411
ATP6V0E2-AS1	141.965	0.0488169	0.351535	0.138868	0.889555	0.970897	0.730805
ATP6V0E2	1596.24	0.392799	0.297025	1.32244	0.186021	0.635112	0.478056
ATP6V1A	7702	0.1774	0.220618	0.804108	0.421335	0.786814	0.592243
ATP6V1B1-AS1	160.924	0.262402	0.362849	0.72317	0.469575	0.81253	0.6116
ATP6V1B1	53.8535	-0.697725	0.593829	-1.17496	0.240011	0.674789	0.507921
ATP6V1B2	3077.54	0.0784565	0.143639	0.546205	0.584925	0.864769	0.650921
ATP6V1C1	3699.62	0.434969	0.188815	2.30367	0.0212409	0.350043	0.263481
ATP6V1C2	80.5079	-0.624919	0.405129	-1.54252	0.122948	0.574638	0.432537
ATP6V1D	2273.88	0.13075	0.163295	0.800698	0.423306	0.787221	0.59255
ATP6V1E1	4275.28	0.115792	0.103176	1.12228	0.261745	0.692145	0.520985
ATP6V1E2	229.854	0.486201	0.260028	1.8698	0.0615109	0.481935	0.362757
ATP6V1F	3248.55	0.211884	0.107543	1.97023	0.0488122	0.454521	0.342123
ATP6V1G1	2627.44	-0.0196562	0.127237	-0.154485	0.877227	0.966626	0.72759
ATP6V1G2-DDX39B	197.502	-1.26718	0.604282	-2.09699	0.0359941	0.420085	0.316202
ATP6V1H	2330.39	0.0993197	0.124123	0.80017	0.423612	0.787228	0.592555
ATP7A	1603.22	-0.239406	0.248661	-0.962781	0.335658	0.74201	0.558519
ATP7B	461.785	-0.455945	0.397551	-1.14688	0.25143	0.683548	0.514514
ATP8A1	641.513	-1.15298	1.05748	-1.0903	0.27558	0.703953	0.529873
ATP8A2	266.24	-1.79314	0.714481	-2.50972	0.0120829	0.286756	0.215844
ATP8B1	51.1967	-0.494615	0.442997	-1.11652	0.2642	0.694514	0.522768
ATP8B2	11871.6	-0.0274347	0.162071	-0.169276	0.86558	0.963532	0.725261
ATP8B3	254.584	-1.07438	0.422706	-2.54167	0.0110323	0.276904	0.208429
ATP9A	6400.32	0.523753	0.283485	1.84755	0.0646671	0.488865	0.367974
ATP9B	341.763	-0.0639866	0.170523	-0.375239	0.707483	0.914224	0.688146
ATPAF1	3015.69	0.150269	0.167778	0.895643	0.370444	0.763542	0.574726
ATPAF2	1086.91	-0.0327114	0.12561	-0.26042	0.79454	0.941879	0.708963
ATPIF1	2913.42	0.139625	0.100988	1.38259	0.166792	0.615512	0.463303
ATR	4964.53	0.384641	0.191999	2.00335	0.0451393	0.4481	0.33729
ATRAID	4910.14	0.0603556	0.138114	0.436997	0.662113	0.89673	0.674979
ATRIP	1450.9	0.341458	0.168537	2.02602	0.0427631	0.444499	0.334579
ATRN	8373.21	-0.0194046	0.134388	-0.144393	0.88519	0.969053	0.729417
ATRNL1	111.055	-0.0904878	0.513727	-0.17614	0.860184	0.962438	0.724438
ATRX	10473.5	-0.00668305	0.0826809	-0.0808295	0.935578	0.983345	0.740175
ATXN1	2532.24	-0.575401	0.413063	-1.39301	0.163616	0.61325	0.4616
ATXN10	4680.31	-0.00745062	0.157188	-0.0473994	0.962195	0.990809	0.745793
ATXN1L	3519.46	-0.0646357	0.0967409	-0.668131	0.50405	0.826135	0.621841
ATXN2	5321.3	0.08081	0.170276	0.474584	0.635084	0.88672	0.667444
ATXN2L	20921.6	0.262607	0.208636	1.25868	0.208144	0.652744	0.491328
ATXN3	1263.7	0.0718442	0.131049	0.548223	0.583539	0.863806	0.650196
ATXN3L	233.257	-1.36753	0.432707	-3.16039	0.00157556	0.105206	0.0791895
ATXN7	3338.04	0.0805963	0.202111	0.398772	0.690061	0.908033	0.683487
ATXN7L1	508.23	0.169461	0.219001	0.773794	0.439053	0.795092	0.598474
ATXN7L2	970.264	0.064301	0.153543	0.418781	0.675376	0.901351	0.678457
ATXN7L3	6698.85	0.00989211	0.138624	0.0713595	0.943112	0.9858	0.742022
ATXN7L3B	9240.38	0.0664662	0.0953606	0.696998	0.485804	0.819866	0.617123
AUH	507.61	-0.301853	0.172938	-1.74544	0.080909	0.518961	0.390628
AUNIP	930.748	0.434297	0.284852	1.52464	0.127349	0.579013	0.435829
AUP1	7603.89	0.0967569	0.111388	0.86865	0.385039	0.769126	0.57893
AURKA	6948.8	0.231036	0.292337	0.790305	0.42935	0.789847	0.594527
AURKAIP1	6326.04	-0.0465434	0.0980754	-0.474567	0.635095	0.88672	0.667444
AURKAPS1	192.218	-0.406742	0.295461	-1.37664	0.168624	0.617127	0.464518
AURKB	3766.52	0.276995	0.248427	1.11499	0.264853	0.694819	0.522998
AUTS2	94.1815	-2.82824	0.964206	-2.93323	0.00335455	0.165974	0.12493
AVEN	792.466	0.120759	0.193571	0.623849	0.532727	0.841168	0.633156
AVIL	108.135	-0.649014	0.460302	-1.40997	0.158548	0.60936	0.458672
AVL9	4722.44	-0.00137893	0.101095	-0.01364	0.989117	0.997076	0.75051
AVPI1	1688.62	-0.0879622	0.156965	-0.560393	0.575211	0.860147	0.647442
AVPR2	128.117	-0.454412	0.855136	-0.531391	0.595148	0.869354	0.654372
AXIN1	3204.37	0.00754625	0.106579	0.0708042	0.943554	0.985912	0.742107
AXL	26848.3	0.530831	0.676585	0.784574	0.432703	0.791287	0.59561
AZGP1	493.194	-1.65467	0.536358	-3.08502	0.00203541	0.126931	0.0955423
AZI2	2614.41	0.333325	0.184374	1.80787	0.0706266	0.503268	0.378816
AZIN1	13982.6	0.206741	0.166243	1.24361	0.213645	0.65647	0.494132
AZIN2	312.255	-0.553634	0.59281	-0.933915	0.350348	0.751056	0.565328
B2M	4923.58	-0.222283	0.197908	-1.12316	0.261369	0.691837	0.520753
B3GALNT2	4275.15	-0.0293386	0.0965587	-0.303842	0.761248	0.930176	0.700154
B3GALT1	50.9487	0.266445	0.396248	0.67242	0.501316	0.82471	0.620769
B3GALT2	121.238	0.0181249	0.774553	0.0234005	0.981331	0.996036	0.749728
B3GALT5	73.7378	-0.0278672	2.03042	-0.0137249	0.989049	0.997076	0.75051
B3GALT6	2563.54	-0.0970264	0.148564	-0.653096	0.513695	0.831735	0.626056
B3GAT1	2233.56	-0.311374	0.726108	-0.428826	0.66805	0.899051	0.676726
B3GAT3	4477.76	-0.334824	0.240255	-1.39362	0.163433	0.61325	0.4616
B3GLCT	920.812	-0.0037417	0.250029	-0.0149651	0.98806	0.997076	0.75051
B3GNT2	1010.65	0.328102	0.121334	2.70412	0.00684856	0.223383	0.168143
B3GNT4	46.2579	-0.662314	0.485528	-1.36411	0.172533	0.622112	0.46827
B3GNT5	1318.2	0.166161	0.297358	0.558791	0.576304	0.860294	0.647553
B3GNT7	9155.79	-1.08934	0.578431	-1.88327	0.0596637	0.478861	0.360444
B3GNT9	81.6621	-1.03968	0.515961	-2.01504	0.0439	0.447827	0.337084
B3GNTL1	473.221	-0.30901	0.253695	-1.21804	0.22321	0.662978	0.499031
B4GALNT1	2357.44	-0.292528	0.266028	-1.09961	0.271501	0.700159	0.527017
B4GALNT3	629.691	-0.171814	0.497406	-0.34542	0.729779	0.921024	0.693265
B4GALNT4	2872.89	-0.634177	0.316622	-2.00295	0.0451827	0.4481	0.33729
B4GALT1	4470.99	-0.188748	0.336151	-0.561497	0.574459	0.859889	0.647248
B4GALT2	4247.11	-0.0759626	0.10224	-0.742982	0.457493	0.806361	0.606957
B4GALT3	4325.17	-0.151251	0.139981	-1.08051	0.279916	0.707675	0.532675
B4GALT4	1137.52	-0.0275148	0.254462	-0.108129	0.913893	0.976793	0.735243
B4GALT5	10380.5	0.0828911	0.10873	0.762356	0.445848	0.798714	0.601201
B4GALT6	3337.82	0.161758	0.135336	1.19523	0.231997	0.669515	0.503951
B4GALT7	1458.22	0.148421	0.146077	1.01604	0.309608	0.727536	0.547624
B4GAT1	1897.03	-0.304973	0.19285	-1.58141	0.113785	0.56428	0.424739
B9D1	954.287	0.0482648	0.134536	0.358751	0.719782	0.916875	0.690142
B9D2	293.966	-0.0992341	0.189493	-0.523681	0.6005	0.870823	0.655478
BAALC	312.558	-0.62361	0.684458	-0.911101	0.362242	0.757575	0.570235
BABAM1	8194.72	0.121502	0.0840279	1.44597	0.148185	0.598914	0.450809
BACE1-AS	140.944	0.186419	0.337293	0.55269	0.580476	0.862066	0.648886
BACE1	7610.25	0.0786336	0.131017	0.600177	0.548388	0.85023	0.639977
BACE2	10508.5	0.139257	0.258576	0.538554	0.590195	0.866942	0.652557
BACH1	3734.68	-0.253121	0.167381	-1.51224	0.130472	0.579959	0.436542
BACH2	386.895	0.131093	0.588492	0.222761	0.823721	0.951276	0.716036
BAD	1714.58	-0.119068	0.222642	-0.534794	0.592792	0.868549	0.653767
BAG1	2144.32	0.249692	0.217104	1.1501	0.250102	0.682929	0.514048
BAG2	1422.73	-0.0664254	0.24982	-0.265893	0.790321	0.940295	0.70777
BAG3	9429.78	0.193807	0.13437	1.44234	0.149206	0.600408	0.451934
BAG4	1703.75	0.0342997	0.107731	0.318383	0.750195	0.926034	0.697036
BAG5	3094.64	0.214451	0.152057	1.41033	0.158442	0.60936	0.458672
BAG6	258.692	0.272656	0.366829	0.743278	0.457313	0.806361	0.606957
BAGE	142.928	-0.783068	0.338159	-2.31568	0.0205756	0.345104	0.259764
BAGE2	636.915	-0.478245	0.17096	-2.79741	0.00515134	0.197045	0.148318
BAGE3	483.332	-0.339613	0.192352	-1.76558	0.0774657	0.513177	0.386274
BAGE4	133.001	-0.302753	0.236346	-1.28097	0.200203	0.644903	0.485426
BAHCC1	4424.79	0.163286	0.171509	0.95206	0.341066	0.744848	0.560655
BAHD1	3024.75	0.0390035	0.115202	0.338567	0.734936	0.922048	0.694036
BAIAP2-AS1	1136.17	-0.146438	0.320332	-0.457143	0.647568	0.893433	0.672497
BAIAP2	1881.43	-0.14193	0.165979	-0.855107	0.392492	0.773496	0.582219
BAIAP2L1	3794.97	0.170969	0.203703	0.839307	0.401297	0.777547	0.585268
BAIAP2L2	1163.4	0.101887	0.342397	0.297569	0.766032	0.931613	0.701235
BAIAP3	113.488	-1.56052	0.575775	-2.7103	0.00672227	0.220279	0.165806
BAK1	1519.94	-0.11393	0.11839	-0.962326	0.335886	0.74201	0.558519
BAMBI	2424.81	0.399877	0.663307	0.602854	0.546606	0.85023	0.639977
BANF1	7740.17	0.205113	0.117087	1.7518	0.0798091	0.516944	0.389109
BANP	1252.44	-0.172004	0.102772	-1.67364	0.0942014	0.542368	0.408247
BAP1	5674.42	0.185339	0.173647	1.06733	0.285823	0.711217	0.535341
BARD1	993.683	0.352906	0.281633	1.25307	0.21018	0.654537	0.492677
BARX1	1835.33	-0.308518	0.686754	-0.449241	0.653258	0.895027	0.673696
BARX2	96.1996	-0.238993	0.836408	-0.285737	0.775079	0.934181	0.703169
BASP1	40.1638	-0.358357	0.443046	-0.808849	0.418602	0.785573	0.591309
BATF2	181.197	0.0196774	0.231624	0.0849541	0.932298	0.982465	0.739512
BATF3	161.591	0.451278	0.373175	1.20929	0.226551	0.664522	0.500193
BAX	4070.24	0.271008	0.222831	1.2162	0.223908	0.663518	0.499437
BAZ1A	5324.8	0.306934	0.199392	1.53935	0.123719	0.574963	0.432781
BAZ1B	16177.8	0.286886	0.18012	1.59274	0.111218	0.561364	0.422545
BAZ2A	13525.9	0.0784972	0.106736	0.735434	0.462075	0.808248	0.608377
BAZ2B	1542.75	-0.38556	0.36236	-1.06402	0.287318	0.712058	0.535974
BBC3	796.002	-0.507787	0.212106	-2.39402	0.0166647	0.320523	0.241261
BBIP1	884.4	0.13878	0.213964	0.648613	0.516589	0.833466	0.627359
BBS1	1608.08	-0.118501	0.201554	-0.587939	0.556574	0.853755	0.642631
BBS10	1566.51	-0.0526736	0.138282	-0.380914	0.703267	0.913009	0.687232
BBS12	355.161	-0.0653302	0.274699	-0.237825	0.812017	0.946768	0.712643
BBS2	2545.13	0.188183	0.173	1.08777	0.276698	0.705045	0.530695
BBS4	1249.21	0.00318118	0.153361	0.0207431	0.983451	0.996069	0.749752
BBS5	340.01	0.00258326	0.183574	0.014072	0.988773	0.997076	0.75051
BBS7	990.549	0.0357103	0.196845	0.181414	0.856043	0.960994	0.723351
BBS9	656.638	0.102448	0.171803	0.596309	0.550969	0.851289	0.640775
BBX	10741.8	0.22605	0.178633	1.26545	0.205712	0.650605	0.489717
BCAM	1675.05	-0.22702	0.297722	-0.762524	0.445747	0.798714	0.601201
BCAN	2946.9	-0.434865	0.241743	-1.79887	0.072039	0.505577	0.380554
BCAP29	3058.84	-0.0481928	0.152917	-0.315156	0.752643	0.926989	0.697755
BCAP31	10778.1	-0.220737	0.212902	-1.0368	0.299828	0.720814	0.542565
BCAR1	3942.23	0.11751	0.260013	0.451939	0.651313	0.894276	0.673131
BCAR3	9337.44	-0.0794355	0.280334	-0.28336	0.776901	0.93487	0.703687
BCAS1	34.6157	-0.410977	0.720928	-0.570066	0.568633	0.857583	0.645512
BCAS2	2417.09	0.198334	0.221265	0.896365	0.370058	0.763542	0.574726
BCAS3	1846.2	0.0360276	0.33799	0.106594	0.915111	0.977386	0.735689
BCAS4	167.183	-0.530731	0.456393	-1.16288	0.244878	0.678504	0.510718
BCAT1	9957.86	0.419616	0.66124	0.63459	0.525696	0.838365	0.631047
BCAT2	3195.65	0.0291428	0.200461	0.145378	0.884412	0.969053	0.729417
BCCIP	6042.7	0.218006	0.195707	1.11394	0.265306	0.694819	0.522998
BCDIN3D-AS1	180.511	-0.0564381	0.275199	-0.205081	0.837509	0.955649	0.719327
BCDIN3D	510.69	0.0092118	0.237048	0.0388605	0.969002	0.991942	0.746646
BCHE	828.014	1.36776	0.531941	2.57127	0.0101326	0.269084	0.202542
BCKDHA	3401.59	-0.106289	0.236768	-0.448917	0.653492	0.895184	0.673815
BCKDHB	736.93	-0.132952	0.193741	-0.686237	0.492563	0.821384	0.618265
BCKDK	5012.13	0.378215	0.0917731	4.1212	3.77e-05	0.00912295	0.00686694
BCL10	1178.18	0.186433	0.138989	1.34135	0.179806	0.630668	0.474711
BCL11A	44.7622	-0.444732	0.667551	-0.666214	0.505274	0.826777	0.622324
BCL2	591.875	0.151963	0.355101	0.427942	0.668693	0.899146	0.676797
BCL2A1	80.1281	0.332652	0.456907	0.728052	0.466582	0.810674	0.610203
BCL2L1	4170.47	0.228198	0.706957	0.322789	0.746855	0.924571	0.695935
BCL2L11	870.604	0.0243155	0.17365	0.140026	0.888639	0.970497	0.730504
BCL2L12	1433.95	0.174987	0.129597	1.35024	0.17694	0.628458	0.473047
BCL2L13	4116.24	0.0457272	0.0861694	0.530667	0.59565	0.86954	0.654512
BCL2L2	2486.22	-0.222646	0.146705	-1.51764	0.129104	0.579013	0.435829
BCL3	1415.29	-0.53638	0.23558	-2.27685	0.0227952	0.364208	0.274144
BCL6	1160.94	0.00477712	0.375501	0.012722	0.98985	0.997264	0.750652
BCL7A	754.315	0.0887484	0.174044	0.509919	0.610108	0.875597	0.659071
BCL7B	3208.5	0.15469	0.175299	0.882435	0.377542	0.766417	0.57689
BCL7C	1985.77	0.126032	0.148738	0.847343	0.396804	0.775246	0.583536
BCL9	5215.4	0.0578731	0.224371	0.257934	0.796458	0.942847	0.709691
BCL9L	8577.18	0.0198212	0.366956	0.0540152	0.956923	0.989749	0.744995
BCLAF1	11455.2	0.290907	0.21229	1.37033	0.170585	0.620292	0.466901
BCOR	6836.07	0.08812	0.17744	0.496618	0.619458	0.88025	0.662574
BCORL1	2406.89	0.221134	0.172773	1.27992	0.200575	0.645157	0.485617
BCR	3305.84	0.00408814	0.152746	0.0267643	0.978648	0.995025	0.748967
BCS1L	1522.89	0.0718574	0.195693	0.367195	0.713473	0.915393	0.689026
BCYRN1	137.808	1.1222	0.577404	1.94354	0.0519515	0.460363	0.34652
BDH2	736.076	0.0873402	0.214681	0.406837	0.684128	0.904931	0.681152
BDNF	288.608	0.0801799	1.17917	0.0679972	0.945788	0.986122	0.742265
BDP1	395.713	-0.154304	0.216033	-0.714259	0.475067	0.81497	0.613437
BECN1	4919.65	0.27677	0.161439	1.7144	0.0864553	0.531208	0.399846
BEGAIN	117.609	-0.337167	0.378007	-0.89196	0.372415	0.764669	0.575575
BEND3	1028.86	0.471903	0.134955	3.49673	0.00047099	0.0512872	0.0386044
BEND3P3	801.527	-0.555474	0.255917	-2.17053	0.0299669	0.403626	0.303814
BEND4	729.309	0.0784186	0.314803	0.249104	0.803281	0.943971	0.710538
BEND5	56.4183	0.765566	0.37146	2.06097	0.0393062	0.431667	0.32492
BEND6	177.629	-0.161852	0.325722	-0.496902	0.619258	0.880143	0.662493
BEND7	115.135	-0.806834	0.568989	-1.41801	0.156187	0.605947	0.456103
BEST1	145.336	-0.153882	0.344008	-0.447322	0.654643	0.89566	0.674173
BET1	941.161	-0.140604	0.154809	-0.908242	0.36375	0.758531	0.570955
BET1L	3261.12	-0.0479329	0.154596	-0.310053	0.756521	0.928229	0.698688
BEX1	36.7939	0.109889	0.450611	0.243867	0.807334	0.945139	0.711416
BEX2	84.979	0.127105	0.496181	0.256166	0.797822	0.943129	0.709904
BEX4	380.073	-0.707243	0.685031	-1.03242	0.301873	0.721112	0.542789
BFAR	145.689	-0.648882	0.262611	-2.47089	0.0134777	0.299671	0.225565
BFSP1	660.556	0.391432	0.519401	0.753621	0.451077	0.802857	0.604319
BGN	1501.2	-1.11353	0.74037	-1.50402	0.132575	0.581032	0.437349
BHLHB9	156.013	-0.471623	0.368671	-1.27925	0.200809	0.645471	0.485853
BHLHE40	3336.9	-0.402437	0.764999	-0.526062	0.598845	0.870013	0.654869
BHLHE41	181.901	0.778384	0.398671	1.95245	0.0508852	0.458849	0.345381
BICC1	833.29	0.198181	0.21881	0.905725	0.365081	0.759584	0.571747
BICD1	2835.66	-0.152832	0.155213	-0.984661	0.324791	0.735243	0.553425
BICD2	5366.36	0.0738856	0.105736	0.698773	0.484694	0.81936	0.616741
BID	1621.41	-0.0954277	0.207272	-0.460398	0.645231	0.892537	0.671822
BIN1	321.535	-0.10145	0.45109	-0.224901	0.822057	0.95053	0.715475
BIN3-IT1	82.9568	-0.84356	0.68579	-1.23006	0.218676	0.659532	0.496437
BIN3	5008.57	-0.16007	0.33535	-0.477323	0.633132	0.88616	0.667022
BIRC2	4962.47	0.155463	0.124942	1.24428	0.213396	0.656426	0.494099
BIRC3	807.006	0.0770217	0.952429	0.0808687	0.935546	0.983345	0.740175
BIRC5	5325.5	0.227559	0.187457	1.21393	0.224776	0.663901	0.499725
BIRC6	13889.5	-0.0669474	0.111512	-0.600363	0.548264	0.85023	0.639977
BISPR	151.396	-0.982669	0.476058	-2.06418	0.0390007	0.430528	0.324063
BIVM-ERCC5	97.3528	-9.81301	3.24868	-3.02061	0.00252264	0.143437	0.107967
BIVM	3888.8	0.372045	0.17409	2.13709	0.0325907	0.411072	0.309419
BLACAT1	410.583	-0.267671	0.238507	-1.12228	0.261745	0.692145	0.520985
BLCAP	1807.74	-0.177205	0.210283	-0.842698	0.399397	0.77701	0.584864
BLID	69.6219	-0.891165	0.431501	-2.06527	0.0388978	0.430528	0.324063
BLM	2474.13	0.43319	0.185897	2.33027	0.0197921	0.340434	0.256248
BLMH	6024.76	0.0956685	0.14043	0.681255	0.49571	0.822352	0.618994
BLOC1S1-RDH5	214.289	0.1143	0.266026	0.429658	0.667445	0.8988	0.676537
BLOC1S1	1909.18	0.0806951	0.173672	0.46464	0.642189	0.890909	0.670597
BLOC1S2	1937.44	0.117847	0.189664	0.621345	0.534372	0.842756	0.634352
BLOC1S3	625.554	-0.087033	0.152006	-0.572564	0.56694	0.857458	0.645418
BLOC1S4	1052.06	-0.16727	0.138412	-1.2085	0.226856	0.664522	0.500193
BLOC1S5	963.254	-0.119986	0.18306	-0.655445	0.512181	0.830439	0.625081
BLOC1S6	4086.74	0.140647	0.11258	1.2493	0.211554	0.656038	0.493807
BLVRA	1862.34	0.14401	0.115061	1.2516	0.210716	0.655164	0.493149
BLVRB	627.056	-0.647415	0.355024	-1.82358	0.0682158	0.50148	0.37747
BLZF1	2033.49	-0.261186	0.0919724	-2.83982	0.00451384	0.190082	0.143077
BMF	336.898	-0.769487	0.475157	-1.61944	0.105353	0.552046	0.415531
BMI1	3361.26	0.335335	0.213137	1.57333	0.115642	0.566448	0.426372
BMP1	2117.87	-0.403135	0.249618	-1.615	0.10631	0.55258	0.415933
BMP2	955.572	0.202462	0.421739	0.480066	0.631181	0.88553	0.666548
BMP2K	680.028	-0.175077	0.329591	-0.531197	0.595282	0.869375	0.654388
BMP4	141.948	0.915003	0.462885	1.97674	0.048071	0.453605	0.341434
BMP6	805.842	0.226663	0.443538	0.511035	0.609327	0.875355	0.658889
BMP7	640.752	0.187551	0.90286	0.20773	0.835439	0.955366	0.719115
BMP8A	276.008	-0.376407	0.23902	-1.57479	0.115304	0.565181	0.425418
BMP8B	1971.95	0.0861619	0.313275	0.275036	0.783288	0.937454	0.705632
BMPR1A	2838.56	0.104578	0.156029	0.670245	0.502701	0.825506	0.621367
BMPR1B	103.051	-0.744572	0.40304	-1.84739	0.0646905	0.488865	0.367974
BMPR2	4021.44	-0.0666762	0.18303	-0.364291	0.715641	0.91572	0.689272
BMS1	7695.24	0.188287	0.154343	1.21992	0.222495	0.662662	0.498793
BMS1P17	56.6015	-0.736498	0.356945	-2.06333	0.0390808	0.430528	0.324063
BMS1P20	617.676	0.0408342	0.17098	0.238824	0.811242	0.946728	0.712613
BMS1P21	48.1859	-0.264629	0.431891	-0.612722	0.54006	0.846351	0.637058
BMS1P4	224.368	-0.139744	0.231715	-0.603085	0.546452	0.85023	0.639977
BMS1P5	206.866	-0.478036	0.229372	-2.08411	0.03715	0.425826	0.320524
BMS1P6	201.172	-0.254	0.222508	-1.14153	0.253647	0.685759	0.516178
BNC1	131.637	-1.01571	0.83933	-1.21014	0.226225	0.664441	0.500132
BNC2	2803.37	0.525183	0.314027	1.67241	0.0944432	0.542368	0.408247
BNIP1	827.51	0.077943	0.258242	0.301822	0.762788	0.930463	0.70037
BNIP2	3972.31	0.102326	0.192124	0.532603	0.594308	0.868939	0.65406
BNIP3	4442.94	0.217396	0.28637	0.759143	0.447767	0.799986	0.602159
BNIP3L	2911.72	0.0623465	0.22382	0.278556	0.780586	0.936379	0.704823
BNIPL	43.7971	-0.727713	0.679609	-1.07078	0.284268	0.710896	0.535099
BOC	1050.21	0.750998	0.981706	0.764993	0.444275	0.797813	0.600523
BOD1	3544.14	-0.127999	0.159932	-0.800333	0.423518	0.787228	0.592555
BOD1L1	15502.7	-0.00110914	0.131751	-0.00841845	0.993283	0.997511	0.750838
BOK	882.999	-0.595848	0.240466	-2.47789	0.0132161	0.298439	0.224638
BOLA1	126.041	0.160272	0.4328	0.370314	0.711148	0.914808	0.688586
BOLA2	42.9026	-0.159948	2.74857	-0.058193	0.953595	0.988552	0.744094
BOLA2B	367.035	-0.16635	0.279041	-0.59615	0.551075	0.851361	0.640828
BOLA3-AS1	1247.29	0.0216413	0.141174	0.153295	0.878166	0.966771	0.727699
BOLA3	1451.18	0.376858	0.176939	2.12988	0.0331817	0.412768	0.310695
BOP1	8069.85	0.104663	0.0881145	1.18781	0.23491	0.672202	0.505974
BORA	1107.33	0.0305707	0.238096	0.128396	0.897835	0.973527	0.732784
BPGM	625.693	0.2601	0.172068	1.51162	0.130632	0.579959	0.436542
BPHL	444.408	0.0730374	0.239182	0.305363	0.760089	0.929896	0.699943
BPIFB1	37.8567	-3.0131	1.12375	-2.6813	0.00733369	0.227658	0.171361
BPNT1	3558.53	0.0738263	0.153901	0.4797	0.631441	0.885568	0.666577
BPTF	9847.1	0.0895587	0.129081	0.693818	0.487796	0.82049	0.617592
BRAF	1562.85	0.0225258	0.108836	0.206971	0.836033	0.955494	0.719211
BRAP	2181.35	0.18069	0.150684	1.19913	0.230477	0.667224	0.502227
BRAT1	3719.55	-0.232316	0.135646	-1.71267	0.0867738	0.531479	0.40005
BRCA1	6743.41	0.568867	0.270504	2.10299	0.035467	0.41996	0.316108
BRCA2	2736.74	0.213453	0.268537	0.794874	0.426687	0.788021	0.593152
BRCAT54	164.223	0.221393	0.589005	0.375876	0.707009	0.914095	0.688049
BRCC3	2532.52	0.430999	0.219512	1.96344	0.049595	0.456184	0.343375
BRD1	1842.7	-0.016472	0.103377	-0.15934	0.873401	0.965938	0.727072
BRD2	723.415	0.318963	0.223031	1.43013	0.15268	0.603703	0.454414
BRD3	4729.9	-0.126922	0.181566	-0.699037	0.484529	0.819277	0.616679
BRD4	12671.2	0.486077	0.173084	2.80833	0.00497985	0.197045	0.148318
BRD7	5072.78	0.307511	0.157907	1.94742	0.0514847	0.459508	0.345877
BRD8	4797.5	0.106115	0.106095	1.00019	0.317216	0.73162	0.550698
BRD9	3717.63	-0.0915872	0.10965	-0.835266	0.403568	0.778763	0.586183
BRE	2177.99	0.34728	0.175147	1.98279	0.0473908	0.452359	0.340496
BRF1	1906.57	0.0888217	0.0844764	1.05144	0.293058	0.716238	0.53912
BRF2	437.203	-0.00647476	0.228777	-0.0283016	0.977422	0.994573	0.748626
BRI3	1697.58	0.0171099	0.165753	0.103225	0.917784	0.97874	0.736709
BRI3BP	1388.84	0.178877	0.163172	1.09625	0.27297	0.701543	0.528059
BRICD5	84.0987	-0.0230905	0.424236	-0.0544285	0.956594	0.989642	0.744915
BRINP2	96.1266	-0.284019	0.449342	-0.632077	0.527337	0.838884	0.631438
BRIP1	1905.32	0.0884059	0.254912	0.346809	0.728735	0.921024	0.693265
BRIX1	6669.08	0.329497	0.173239	1.90198	0.0571731	0.475804	0.358143
BRK1	3304.85	0.185496	0.20039	0.925677	0.354614	0.753741	0.567349
BRMS1	2674.04	0.167524	0.123339	1.35824	0.174389	0.624341	0.469948
BRMS1L	740.402	0.194751	0.209687	0.928772	0.353007	0.752392	0.566333
BROX	5331.04	0.243901	0.167963	1.45211	0.14647	0.597359	0.449638
BRPF1	2461.29	0.462591	0.212336	2.17858	0.0293629	0.401641	0.30232
BRPF3	3346.99	0.000406689	0.230002	0.00176819	0.998589	0.999284	0.752172
BRSK1	2610.22	-0.417534	0.30175	-1.38371	0.166447	0.614721	0.462707
BRSK2	109.763	-0.0266366	0.388962	-0.068481	0.945403	0.986122	0.742265
BRWD1	3588.22	-0.189184	0.177585	-1.06532	0.286732	0.711728	0.535725
BRWD3	4739.94	-0.195659	0.181175	-1.07994	0.280167	0.707675	0.532675
BSCL2	4193.12	-0.00720312	0.161156	-0.0446966	0.964349	0.991367	0.746213
BSDC1	4132.83	-0.273246	0.174488	-1.56599	0.117351	0.568575	0.427972
BSG	28230.5	0.020448	0.139849	0.146215	0.883751	0.969053	0.729417
BSN	367.858	0.229084	0.293301	0.781057	0.434769	0.792596	0.596596
BST1	526.83	0.700459	0.269315	2.60089	0.00929812	0.256078	0.192753
BST2	269.101	-1.17537	0.477965	-2.45912	0.0139278	0.302861	0.227967
BTAF1	5823.88	-0.267376	0.110824	-2.41262	0.0158385	0.315345	0.237364
BTBD1	5891.1	0.163093	0.143565	1.13602	0.255947	0.688035	0.517891
BTBD10	1295.8	0.0172599	0.217848	0.0792288	0.936851	0.983613	0.740377
BTBD11	460.204	0.73406	2.73862	0.268041	0.788668	0.939999	0.707548
BTBD18	40.0072	-0.943396	0.583404	-1.61705	0.105867	0.552046	0.415531
BTBD19	457.238	-0.598269	0.322676	-1.85408	0.0637273	0.485274	0.365271
BTBD2	5495.2	-0.0395228	0.192539	-0.205271	0.83736	0.955649	0.719327
BTBD3	8742.16	-0.199813	0.180696	-1.1058	0.268814	0.697811	0.52525
BTBD6	1655.82	0.0949233	0.130436	0.727737	0.466775	0.810674	0.610203
BTBD7	71.2681	-0.392931	0.421571	-0.932064	0.351303	0.752125	0.566133
BTBD8	52.979	-1.21151	0.712335	-1.70077	0.088987	0.535813	0.403312
BTBD9	1198.75	-0.297903	0.203919	-1.46089	0.144046	0.594963	0.447835
BTD	1045.28	0.0149656	0.353509	0.0423345	0.966232	0.991671	0.746442
BTF3	27002.4	0.0269822	0.0875009	0.308365	0.757805	0.928567	0.698942
BTF3L4	4199.97	0.00250953	0.143467	0.0174921	0.986044	0.996493	0.750071
BTG1	7997.51	-0.13063	0.169119	-0.772417	0.439868	0.795651	0.598896
BTG2	1382.46	-0.274254	0.323779	-0.84704	0.396973	0.775246	0.583536
BTG3	1328.14	0.311272	0.164369	1.89374	0.0582594	0.478081	0.359857
BTN2A1	1245.77	-0.0544839	0.16525	-0.329706	0.741622	0.922774	0.694582
BTN2A2	964.535	0.353827	0.201944	1.7521	0.0797559	0.516944	0.389109
BTN2A3P	101.467	-0.163892	0.279557	-0.586254	0.557705	0.853888	0.642731
BTN3A1	1019.42	0.0909272	0.189917	0.478774	0.632099	0.885656	0.666643
BTN3A2	1936.82	0.121989	0.164831	0.740088	0.459247	0.807291	0.607657
BTN3A3	734.866	0.118912	0.188761	0.62996	0.52872	0.839378	0.631809
BTRC	2729.88	0.0500263	0.123707	0.404393	0.685924	0.906031	0.68198
BUB1	5102.26	0.245855	0.267241	0.919975	0.357586	0.754808	0.568152
BUB1B	6886.67	0.307867	0.221401	1.39054	0.164366	0.61325	0.4616
BUB3	10364.5	0.189874	0.178312	1.06484	0.286947	0.711952	0.535894
BUD13	2092.31	0.323855	0.189954	1.70491	0.0882109	0.534652	0.402438
BUD31	5122.42	0.289868	0.165401	1.75252	0.0796838	0.516722	0.388942
BVES	716.267	-0.169966	0.21014	-0.808823	0.418617	0.785573	0.591309
BYSL	2158.62	0.111251	0.174711	0.636775	0.524271	0.83784	0.630651
BZW1	11582.4	0.316947	0.202894	1.56213	0.118257	0.569346	0.428553
BZW2	8979.18	0.13503	0.153188	0.881467	0.378065	0.766417	0.57689
C10orf10	78.5154	-0.555186	0.367894	-1.50909	0.131275	0.580005	0.436576
C10orf11	88.2271	0.231558	0.463571	0.499509	0.617421	0.879807	0.66224
C10orf12	1131.02	0.231906	0.187839	1.2346	0.216978	0.658256	0.495477
C10orf2	5326.21	0.0852313	0.130149	0.654872	0.51255	0.830737	0.625305
C10orf25	76.6513	0.641276	0.480006	1.33597	0.181557	0.630867	0.474861
C10orf32	806.643	-0.394249	0.152944	-2.57773	0.0099451	0.266634	0.200698
C10orf35	104.82	-0.0396321	0.451789	-0.0877227	0.930097	0.981619	0.738875
C10orf54	541.389	0.391262	0.224505	1.74278	0.0813726	0.519604	0.391112
C10orf76	2158.8	0.0432399	0.0998052	0.433243	0.664838	0.897612	0.675642
C10orf88	735.583	-0.223696	0.146176	-1.53031	0.125939	0.577058	0.434358
C10orf90	1330.21	0.587745	0.309656	1.89805	0.0576889	0.477301	0.35927
C11orf1	823.65	0.378951	0.233519	1.62278	0.104637	0.552046	0.415531
C11orf24	5043.33	0.107427	0.146753	0.732024	0.464154	0.809558	0.609363
C11orf30	2138.88	0.116007	0.110798	1.04702	0.295092	0.717138	0.539798
C11orf31	5055.27	0.0217628	0.138664	0.156947	0.875287	0.965938	0.727072
C11orf45	82.2285	0.768407	0.447606	1.7167	0.0860331	0.5309	0.399614
C11orf49	1823.91	0.121944	0.209109	0.583159	0.559786	0.854537	0.643219
C11orf54	1297.33	0.0787987	0.110036	0.71612	0.473917	0.81441	0.613015
C11orf57	2906.36	0.0402697	0.212861	0.189183	0.849949	0.959098	0.721923
C11orf58	5336.99	0.24664	0.159764	1.54378	0.122642	0.574304	0.432285
C11orf63	325.606	-0.680628	0.379499	-1.79349	0.0728945	0.505956	0.380839
C11orf68	3393.42	-0.253789	0.269329	-0.9423	0.346039	0.749354	0.564047
C11orf70	50.6929	0.0386903	0.652307	0.059313	0.952703	0.988285	0.743893
C11orf71	498.054	-0.16056	0.258919	-0.620116	0.535182	0.843228	0.634707
C11orf73	1716.41	-0.261913	0.14106	-1.85675	0.0633472	0.485228	0.365237
C11orf74	384.364	0.207614	0.45585	0.455444	0.64879	0.893726	0.672717
C11orf80	739.572	-0.0626848	0.156157	-0.40142	0.688111	0.907055	0.68275
C11orf84	3788.89	-0.211621	0.126832	-1.66851	0.0952138	0.542452	0.40831
C11orf91	69.3641	0.364508	0.445712	0.81781	0.413466	0.782594	0.589067
C11orf95	3154.21	-0.457511	0.189588	-2.41319	0.0158138	0.315345	0.237364
C11orf96	183.324	-0.56129	0.52728	-1.0645	0.287102	0.711952	0.535894
C11orf98	3955.82	0.243557	0.0888927	2.7399	0.00614579	0.213582	0.160766
C12orf10	4121.69	0.0128573	0.0999184	0.128678	0.897612	0.973412	0.732698
C12orf29	2159.72	0.171146	0.18087	0.946235	0.344029	0.747058	0.562319
C12orf4	1753.49	0.209093	0.197689	1.05769	0.290199	0.714072	0.537489
C12orf43	1383.44	0.178504	0.148407	1.2028	0.229052	0.666505	0.501685
C12orf45	696.542	0.122068	0.13907	0.877746	0.380082	0.767426	0.57765
C12orf49	3790	-0.0193255	0.0914655	-0.211287	0.832663	0.95435	0.71835
C12orf57	2976.71	-0.153125	0.181252	-0.844815	0.398214	0.776142	0.584211
C12orf60	78.0503	0.636943	0.430947	1.47801	0.139406	0.588938	0.4433
C12orf65	906.093	0.088876	0.176247	0.50427	0.614072	0.877529	0.660526
C12orf66	841.625	0.0544121	0.180013	0.302267	0.762448	0.93029	0.700239
C12orf73	634.687	-0.186909	0.139973	-1.33532	0.181772	0.630867	0.474861
C12orf75	2869.6	0.202426	0.29201	0.693216	0.488174	0.820555	0.617641
C12orf76	513.63	-0.453216	0.251769	-1.80013	0.0718401	0.505577	0.380554
C12orf79	70.3523	0.775075	0.581011	1.33401	0.1822	0.63108	0.475021
C14orf1	824.68	0.0294247	0.126444	0.23271	0.815987	0.948133	0.71367
C14orf119	1742.74	0.0903084	0.0896956	1.00683	0.314016	0.730399	0.549779
C14orf132	330.498	-0.197028	0.509744	-0.386524	0.699109	0.912415	0.686785
C14orf159	927.582	-0.0592211	0.272653	-0.217203	0.82805	0.95276	0.717153
C14orf166	4227.72	0.191325	0.109831	1.742	0.0815082	0.519743	0.391217
C14orf169	1229.81	0.0324381	0.121607	0.266746	0.789665	0.940081	0.707609
C14orf2	1838.12	-0.0143077	0.115758	-0.1236	0.901632	0.974536	0.733544
C14orf28	92.7145	-0.0414688	0.423625	-0.0978903	0.922019	0.979241	0.737085
C14orf37	62.3549	-0.486814	0.696858	-0.698585	0.484812	0.819364	0.616744
C14orf79	499.892	-0.214337	0.249833	-0.857918	0.390938	0.77308	0.581906
C14orf80	886.486	0.0209943	0.124494	0.168638	0.866082	0.963604	0.725316
C14orf93	637.312	0.153066	0.186206	0.822025	0.411063	0.781912	0.588554
C15orf38-AP3S2	517.638	-0.829123	0.671593	-1.23456	0.216993	0.658256	0.495477
C15orf39	2459.18	0.148028	0.152417	0.971203	0.331447	0.739481	0.556616
C15orf40	983.403	-0.0386427	0.137389	-0.281264	0.778508	0.935303	0.704013
C15orf41	1096.39	0.232478	0.2294	1.01341	0.310862	0.728812	0.548585
C15orf48	34.974	0.262636	0.716395	0.366607	0.713912	0.915397	0.689029
C15orf52	6671.29	-0.0634048	0.31038	-0.204281	0.838134	0.955786	0.719431
C15orf54	243.811	1.5023	1.28015	1.17354	0.240581	0.67505	0.508117
C15orf56	45.3604	-0.708036	0.51014	-1.38792	0.16516	0.61325	0.4616
C15orf57	809.575	-0.0902968	0.13505	-0.668617	0.50374	0.826135	0.621841
C15orf59	45.9441	-0.952223	0.503123	-1.89262	0.0584078	0.478222	0.359963
C15orf61	432.231	-0.701167	0.216996	-3.23125	0.00123249	0.0954158	0.0718205
C15orf62	129.651	-1.03379	0.360194	-2.8701	0.00410342	0.181685	0.136756
C15orf65	84.2528	0.026097	0.462437	0.0564337	0.954996	0.988949	0.744393
C16orf13	3412.74	-0.00331384	0.137098	-0.0241713	0.980716	0.995769	0.749527
C16orf45	333.158	0.200866	0.407088	0.493422	0.621714	0.880812	0.662997
C16orf46	153.763	-0.579501	0.24845	-2.33246	0.0196763	0.340434	0.256248
C16orf47	102.812	-0.0234055	0.302607	-0.0773463	0.938348	0.984236	0.740846
C16orf52	11071.6	-0.265961	0.132835	-2.00219	0.0452638	0.4481	0.33729
C16orf58	6856.08	0.0206034	0.164424	0.125307	0.900281	0.97419	0.733283
C16orf59	925.837	-0.0292963	0.174691	-0.167704	0.866816	0.963746	0.725422
C16orf62	4679.14	0.243429	0.135833	1.79211	0.073115	0.505956	0.380839
C16orf70	1198.15	0.055633	0.13974	0.398118	0.690543	0.908078	0.68352
C16orf71	51.7927	0.252037	0.484584	0.520111	0.602987	0.871726	0.656158
C16orf72	3793.15	-0.107782	0.126426	-0.85253	0.39392	0.774042	0.58263
C16orf74	200.617	-0.546619	0.553571	-0.987441	0.323426	0.734705	0.55302
C16orf86	293.839	-0.341237	0.350455	-0.973698	0.330207	0.738534	0.555903
C16orf87	770.802	-0.0195784	0.164031	-0.119358	0.904992	0.974854	0.733784
C16orf91	1250.52	-0.0645033	0.128175	-0.503242	0.614794	0.878194	0.661026
C16orf93	164.661	0.198521	0.321413	0.617649	0.536807	0.843839	0.635167
C16orf95	144.875	0.149716	0.24326	0.615457	0.538253	0.845165	0.636165
C17orf100	162.77	-0.0203412	0.276747	-0.073501	0.941407	0.985287	0.741636
C17orf107	38.5156	-0.395226	0.623536	-0.633846	0.526181	0.838365	0.631047
C17orf49	2158.22	0.359423	0.109083	3.29494	0.000984416	0.0843642	0.0635019
C17orf51	1422.36	-0.148498	0.402355	-0.369072	0.712074	0.915043	0.688763
C17orf53	1046.9	0.239645	0.133765	1.79154	0.0732068	0.506013	0.380882
C17orf58	915.159	0.283313	0.247749	1.14355	0.252812	0.68507	0.51566
C17orf59	514.84	-0.240116	0.274599	-0.874424	0.381888	0.767985	0.578071
C17orf62	2807.6	-0.165352	0.184331	-0.897038	0.369699	0.763451	0.574658
C17orf67	85.7063	-0.928826	0.43287	-2.14574	0.0318938	0.408962	0.30783
C17orf75	1449.53	0.238458	0.204731	1.16474	0.244126	0.678171	0.510467
C17orf80	2534.28	0.164686	0.169448	0.971894	0.331103	0.739481	0.556616
C17orf85	4310.92	-0.00942613	0.101742	-0.0926472	0.926184	0.980055	0.737698
C17orf89	1792.57	0.0959767	0.119571	0.802678	0.422161	0.787126	0.592479
C17orf96	55.4838	-0.915519	0.470476	-1.94594	0.0516616	0.459515	0.345882
C17orf97	156.404	0.8653	0.272424	3.1763	0.00149167	0.103874	0.0781868
C18orf21	667.946	-0.0155055	0.174208	-0.0890056	0.929077	0.981166	0.738534
C18orf25	3101.77	0.00309902	0.139524	0.0222114	0.982279	0.996069	0.749752
C18orf32	672.946	0.313862	0.256159	1.22526	0.220477	0.660511	0.497174
C18orf54	1012.82	0.0946173	0.293645	0.322216	0.747289	0.924885	0.696171
C18orf65	54.051	0.136863	0.451447	0.303165	0.761764	0.930176	0.700154
C18orf8	1711.57	0.105135	0.133244	0.789041	0.430088	0.790402	0.594944
C19orf12	1605.33	-0.126603	0.13391	-0.945429	0.34444	0.747224	0.562444
C19orf24	1477.21	0.129267	0.13795	0.937058	0.348729	0.751056	0.565328
C19orf25	1238.68	-0.439215	0.17126	-2.56461	0.0103292	0.269084	0.202542
C19orf43	9579.04	0.214948	0.0926376	2.32031	0.0203239	0.342914	0.258115
C19orf44	1510.15	-0.0512747	0.111524	-0.459764	0.645686	0.89271	0.671952
C19orf47	1327.74	0.215021	0.171698	1.25232	0.210452	0.655074	0.493082
C19orf48	5389.35	0.136629	0.198293	0.689024	0.490808	0.821384	0.618265
C19orf52	1337.83	-0.142537	0.112481	-1.26721	0.205079	0.649687	0.489027
C19orf53	5917.25	0.209546	0.101836	2.05767	0.0396215	0.432686	0.325687
C19orf54	1440.51	0.275966	0.149067	1.85129	0.0641282	0.486796	0.366417
C19orf57	334.441	-0.0125196	0.260513	-0.0480575	0.96167	0.990727	0.745731
C19orf60	2080.13	0.0406927	0.154546	0.263305	0.792315	0.941073	0.708356
C19orf66	1567.06	0.141652	0.279349	0.50708	0.612099	0.876788	0.659968
C19orf68	587.653	0.0815001	0.173416	0.469968	0.638378	0.888633	0.668884
C19orf70	2408.67	0.110114	0.176599	0.623526	0.532939	0.841168	0.633156
C19orf71	622.573	-0.857342	0.386683	-2.21717	0.0266112	0.38836	0.292323
C19orf81	56.3089	-0.039503	0.380517	-0.103814	0.917317	0.978563	0.736575
C1D	965.418	0.170518	0.197726	0.862395	0.38847	0.77149	0.580709
C1GALT1	1658.14	0.246484	0.340142	0.724649	0.468667	0.811653	0.61094
C1GALT1C1	1471.18	0.342142	0.161073	2.12414	0.0336584	0.413961	0.311593
C1GALT1C1L	78.4401	0.701029	0.310476	2.25792	0.0239507	0.371063	0.279303
C1orf106	1569.95	-0.166573	0.171738	-0.969926	0.332084	0.739736	0.556808
C1orf109	1563.51	-0.0243282	0.164028	-0.148317	0.882092	0.968728	0.729172
C1orf112	2125.33	0.304496	0.204072	1.4921	0.135673	0.585822	0.440955
C1orf122	2357.99	-0.364483	0.215957	-1.68776	0.091458	0.538495	0.405331
C1orf123	1523.69	0.20344	0.136866	1.48642	0.137169	0.587144	0.44195
C1orf131	1535.62	0.304199	0.168647	1.80376	0.0712693	0.504354	0.379632
C1orf159	827.654	0.0995167	0.186364	0.533992	0.593347	0.868598	0.653803
C1orf174	1486.78	0.252836	0.20766	1.21755	0.223396	0.663128	0.499144
C1orf198	4325.48	-0.0963852	0.276392	-0.348726	0.727295	0.920332	0.692744
C1orf21	2544.59	0.285636	0.385143	0.741636	0.458308	0.80674	0.607242
C1orf216	1320.98	-0.205853	0.16605	-1.2397	0.215085	0.657206	0.494686
C1orf220	73.4805	-0.100676	0.473828	-0.212474	0.831737	0.954024	0.718104
C1orf226	1335.96	0.265131	0.380494	0.696807	0.485923	0.81997	0.617201
C1orf233	561.183	-0.326667	0.356479	-0.916371	0.359472	0.756121	0.56914
C1orf27	2507.8	-0.262175	0.112814	-2.32395	0.0201282	0.341764	0.25725
C1orf35	1450.4	0.160307	0.171002	0.937461	0.348522	0.751056	0.565328
C1orf43	18566	0.148842	0.0787074	1.89108	0.0586131	0.478228	0.359968
C1orf50	375.599	-0.155437	0.214068	-0.726111	0.467771	0.811292	0.610668
C1orf52	1142.99	-0.0137647	0.126952	-0.108424	0.913659	0.976793	0.735243
C1orf53	180.505	0.0486718	0.38187	0.127457	0.898579	0.973616	0.732851
C1orf54	55.8362	-0.262917	0.519075	-0.506511	0.612498	0.876873	0.660032
C1orf56	742.453	-0.103737	0.221173	-0.46903	0.639048	0.888732	0.668958
C1orf61	106.932	-0.540891	0.742437	-0.728535	0.466286	0.810674	0.610203
C1orf74	707.048	0.221866	0.21435	1.03506	0.30064	0.720814	0.542565
C1QBP	18415.4	0.124219	0.132783	0.935503	0.349529	0.751056	0.565328
C1QL1	593.866	-0.225529	0.263862	-0.854724	0.392704	0.773577	0.58228
C1QL4	146.576	-0.0456972	0.404444	-0.112988	0.91004	0.975847	0.734531
C1QTNF1	921.586	0.0825352	0.423276	0.194991	0.8454	0.958131	0.721196
C1QTNF3	302.192	-0.5824	0.642353	-0.906666	0.364583	0.759183	0.571446
C1QTNF6	140.347	-1.41694	0.507602	-2.79143	0.00524752	0.19826	0.149232
C1QTNF9B-AS1	37.2666	-0.0952326	1.1797	-0.080726	0.93566	0.983345	0.740175
C1R	773.208	0.29736	0.267272	1.11258	0.26589	0.695096	0.523206
C1RL-AS1	438.694	-0.0967809	0.26584	-0.364057	0.715816	0.915778	0.689316
C1RL	867.636	-0.023973	0.200089	-0.119812	0.904632	0.974854	0.733784
C20orf166-AS1	107.063	-5.11698	1.75048	-2.92318	0.00346476	0.16675	0.125514
C20orf194	926.526	-0.361868	0.267103	-1.35479	0.175485	0.626389	0.47149
C20orf196	239.426	0.365168	0.214855	1.6996	0.0892064	0.535813	0.403312
C20orf24	4658.26	0.253942	0.184025	1.37993	0.167608	0.615956	0.463637
C20orf27	2749.04	0.195019	0.230954	0.844405	0.398443	0.776268	0.584306
C20orf96	327.487	0.151995	0.229329	0.662782	0.50747	0.828575	0.623678
C21orf2	937.776	-0.002489	0.16482	-0.0151014	0.987951	0.997076	0.75051
C21orf33	1381.6	-0.157313	0.121735	-1.29226	0.196269	0.642249	0.483428
C21orf58	1185.28	0.255282	0.156822	1.62785	0.103557	0.552046	0.415531
C21orf59	2586.16	-0.0492781	0.103731	-0.475054	0.634748	0.886619	0.667368
C21orf91	932.931	0.0553704	0.177168	0.312531	0.754637	0.927954	0.698481
C22orf23	1494.37	-0.298466	0.229672	-1.29953	0.193762	0.639368	0.48126
C22orf29	1328.3	-0.0112616	0.15557	-0.0723895	0.942292	0.985595	0.741868
C22orf34	114.181	-1.00558	0.642598	-1.56487	0.117613	0.568932	0.428241
C22orf39	620.579	-0.0850243	0.154669	-0.549718	0.582513	0.86362	0.650056
C22orf46	1996.17	0.0530537	0.146775	0.361462	0.717754	0.916105	0.689563
C2CD2	38.694	-0.579906	0.649281	-0.893152	0.371776	0.76411	0.575154
C2CD2L	2305.18	-0.0533887	0.193283	-0.276221	0.782379	0.937114	0.705376
C2CD3	3399.59	0.128734	0.103823	1.23993	0.215001	0.657206	0.494686
C2CD4D	56.3243	0.273276	0.615031	0.444328	0.656805	0.896158	0.674548
C2CD5	3656.01	-0.074548	0.133092	-0.560122	0.575397	0.860147	0.647442
C2orf16	68.2383	-0.151416	0.491557	-0.308034	0.758057	0.928762	0.69909
C2orf42	675.636	0.135954	0.215256	0.63159	0.527655	0.839011	0.631533
C2orf44	1731.18	0.105688	0.17688	0.597515	0.550164	0.850908	0.640488
C2orf47	666.406	0.108739	0.188892	0.575669	0.564839	0.856122	0.644412
C2orf48	108.413	0.402245	0.482913	0.832956	0.40487	0.779848	0.587
C2orf49	1177.16	0.0483598	0.132935	0.363785	0.716019	0.915872	0.689387
C2orf68	3198.99	-0.0800919	0.139541	-0.573968	0.565989	0.856663	0.64482
C2orf69	893.82	-0.0307095	0.252028	-0.121849	0.903018	0.974659	0.733637
C2orf70	58.0681	-0.705582	0.498692	-1.41487	0.157108	0.607988	0.457639
C2orf72	100.386	0.0414589	0.355972	0.116467	0.907283	0.975331	0.734142
C2orf74	468.305	0.248406	0.152334	1.63067	0.10296	0.552046	0.415531
C2orf76	163.466	0.446812	0.238133	1.87631	0.0606128	0.480153	0.361417
C2orf81	648.267	0.218106	0.255496	0.853657	0.393295	0.77391	0.582531
C2orf88	46.219	-0.632219	0.571103	-1.10701	0.268288	0.697805	0.525245
C3	745.11	-0.371372	1.03346	-0.35935	0.719333	0.916799	0.690085
C3AR1	171.846	-0.278021	0.614016	-0.45279	0.6507	0.89404	0.672953
C3orf14	582.776	0.599879	0.360087	1.66593	0.095728	0.542572	0.4084
C3orf17	3268.71	0.111702	0.160535	0.695809	0.486548	0.820158	0.617342
C3orf18	340.64	0.159919	0.346378	0.461689	0.644304	0.892007	0.671424
C3orf33	276.138	-0.0485955	0.274687	-0.176912	0.859577	0.962262	0.724305
C3orf38	1459.3	0.200318	0.200461	0.999289	0.317655	0.73165	0.550721
C3orf52	198.991	-0.359702	0.276302	-1.30185	0.192969	0.639151	0.481096
C3orf58	989.156	0.409887	0.296729	1.38135	0.167171	0.615543	0.463326
C3orf62	302.674	0.345222	0.326877	1.05612	0.290912	0.714788	0.538029
C3orf67	287.939	0.546043	0.407086	1.34134	0.179809	0.630668	0.474711
C3orf70	516.263	-0.262331	0.292785	-0.895984	0.370261	0.763542	0.574726
C3orf80	78.2971	0.275271	0.479686	0.573855	0.566066	0.856663	0.64482
C4orf19	904.097	-0.192007	0.472375	-0.406471	0.684396	0.904931	0.681152
C4orf27	897.769	-0.0174908	0.217803	-0.0803054	0.935994	0.983369	0.740192
C4orf29	343.414	-0.0894183	0.244333	-0.365969	0.714388	0.915397	0.689029
C4orf3	1352.14	0.379692	0.18009	2.10834	0.0350012	0.419048	0.315422
C4orf32	999.326	-0.146269	0.360113	-0.406176	0.684614	0.905059	0.681248
C4orf33	410.456	-0.0616334	0.205801	-0.299481	0.764573	0.931324	0.701018
C4orf46	1014.5	0.204824	0.243619	0.840752	0.400487	0.777279	0.585066
C4orf48	779.895	-0.294978	0.264643	-1.11463	0.265011	0.694819	0.522998
C5	152.545	0.0951344	0.564784	0.168444	0.866234	0.963604	0.725316
C5AR1	70.9359	-3.35845	1.31606	-2.55189	0.010714	0.274516	0.206631
C5orf15	5368.45	0.198699	0.130889	1.51807	0.128996	0.579013	0.435829
C5orf22	2855.82	0.340986	0.185953	1.83372	0.066695	0.49639	0.373639
C5orf24	6585.15	-0.0607179	0.134801	-0.450428	0.652402	0.895027	0.673696
C5orf28	579.125	0.126432	0.286743	0.440924	0.659268	0.89637	0.674708
C5orf30	1816.5	0.18118	0.134218	1.3499	0.177048	0.628458	0.473047
C5orf34	887.499	0.343022	0.239051	1.43493	0.151306	0.601652	0.45287
C5orf42	2119.97	-0.376955	0.161754	-2.33041	0.0197843	0.340434	0.256248
C5orf45	307.697	-0.148467	0.215675	-0.688383	0.491211	0.821384	0.618265
C5orf51	4436.52	0.157204	0.15225	1.03254	0.30182	0.721112	0.542789
C5orf56	35.8201	-0.559916	0.57158	-0.979592	0.327287	0.736108	0.554077
C5orf58	117.763	-0.224357	0.514433	-0.436125	0.662746	0.896839	0.675061
C5orf63	99.1629	-0.248325	0.320884	-0.773878	0.439003	0.795092	0.598474
C5orf66	222.59	-0.487458	0.260111	-1.87404	0.0609249	0.480743	0.36186
C6orf1	1043.08	-0.0437127	0.130907	-0.333921	0.738439	0.922158	0.694119
C6orf106	4986.76	0.0289113	0.100132	0.288731	0.772787	0.934048	0.703068
C6orf120	2782.62	-0.316794	0.144166	-2.19743	0.02799	0.396871	0.298729
C6orf141	477.485	-0.426543	0.396603	-1.07549	0.282155	0.709069	0.533724
C6orf203	485.894	0.0605634	0.194113	0.312	0.75504	0.927954	0.698481
C6orf226	112.287	-0.219172	0.302104	-0.725484	0.468155	0.811608	0.610907
C6orf47	75.8159	0.0143079	0.329288	0.0434511	0.965342	0.991671	0.746442
C6orf62	5839.98	0.0794512	0.148574	0.534758	0.592817	0.868549	0.653767
C6orf89	4548.1	-0.0817415	0.165771	-0.4931	0.621942	0.880862	0.663034
C7orf13	151.942	-0.0448482	0.262546	-0.17082	0.864365	0.963411	0.72517
C7orf25	1165.65	0.331517	0.12479	2.65661	0.00789312	0.235818	0.177503
C7orf26	1841.91	0.0319809	0.148185	0.215817	0.82913	0.95276	0.717153
C7orf31	413.967	0.498657	0.206227	2.41799	0.0156063	0.315176	0.237237
C7orf43	1749.92	-0.447739	0.21065	-2.12552	0.0335435	0.413297	0.311093
C7orf49	2684.25	0.18861	0.150267	1.25516	0.20942	0.654427	0.492595
C7orf50	3087.61	-0.0433986	0.141998	-0.305629	0.759887	0.929809	0.699878
C7orf55	806.553	-0.109657	0.155414	-0.705579	0.48045	0.817598	0.615415
C7orf60	823.914	-0.105497	0.157352	-0.670454	0.502568	0.825427	0.621308
C7orf73	3086.98	0.233232	0.143601	1.62417	0.10434	0.552046	0.415531
C8orf33	4209.24	0.212047	0.190323	1.11414	0.265217	0.694819	0.522998
C8orf37	368.485	0.0732982	0.217248	0.337394	0.73582	0.922048	0.694036
C8orf44-SGK3	39.6471	0.31276	0.799699	0.391097	0.695725	0.910735	0.68552
C8orf44	142.692	-0.437534	0.327837	-1.33461	0.182005	0.630867	0.474861
C8orf46	61.349	0.971428	0.596687	1.62804	0.103517	0.552046	0.415531
C8orf48	117.368	0.524135	0.384301	1.36386	0.17261	0.622112	0.46827
C8orf58	1127.78	-0.0301737	0.294618	-0.102416	0.918426	0.97874	0.736709
C8orf59	1593.12	-0.0344337	0.11794	-0.291959	0.770318	0.933215	0.702441
C8orf76	1445.88	-0.0476369	0.135743	-0.350934	0.725638	0.919946	0.692453
C8orf82	1425.46	-0.413172	0.273881	-1.50858	0.131405	0.580217	0.436736
C8orf88	521.403	-0.241294	0.303032	-0.796268	0.425876	0.787457	0.592728
C9orf114	3726.85	-0.0941065	0.151641	-0.620587	0.534872	0.843167	0.634661
C9orf116	156.764	-0.3085	0.478791	-0.644332	0.51936	0.835942	0.629222
C9orf117	129.801	-0.762014	0.30422	-2.50481	0.0122516	0.287768	0.216606
C9orf142	1507.25	-0.383436	0.245165	-1.56399	0.11782	0.568932	0.428241
C9orf156	567.194	0.076402	0.291813	0.261819	0.793461	0.941354	0.708568
C9orf16	2363.81	-0.384597	0.303621	-1.2667	0.205262	0.649687	0.489027
C9orf163	60.982	-0.478239	0.414466	-1.15387	0.248554	0.681754	0.513163
C9orf172	354.166	-0.659855	0.422449	-1.56198	0.118294	0.569346	0.428553
C9orf3	1867.63	0.371493	0.17478	2.12549	0.0335461	0.413297	0.311093
C9orf40	1411.13	0.081357	0.257053	0.3165	0.751623	0.926908	0.697694
C9orf64	522.703	-0.420953	0.346785	-1.21387	0.224797	0.663901	0.499725
C9orf69	3566.45	-0.337109	0.208317	-1.61825	0.105608	0.552046	0.415531
C9orf72	1209.2	-0.0496277	0.179733	-0.276118	0.782457	0.937114	0.705376
C9orf78	4388.48	0.0963452	0.142479	0.676205	0.49891	0.824129	0.620331
C9orf85	887.404	-0.343406	0.224131	-1.53216	0.125482	0.577058	0.434358
C9orf89	2051.66	-0.516972	0.352983	-1.46458	0.143036	0.593812	0.446969
C9orf9	247.14	-0.236814	0.358509	-0.660553	0.508899	0.829109	0.62408
C9orf91	1483.33	-0.0181873	0.258703	-0.070302	0.943953	0.985915	0.742109
CA11	360.772	-0.189272	0.45891	-0.412438	0.680019	0.903554	0.680115
CA12	70.1652	-0.950003	0.685034	-1.3868	0.165504	0.613799	0.462013
CA13	146.839	-0.345999	0.695987	-0.497134	0.619095	0.880087	0.662451
CA14	44.5784	-0.493331	0.437192	-1.12841	0.259147	0.690223	0.519539
CA5B	1772.93	0.435091	0.389111	1.11817	0.263495	0.693574	0.522061
CA5BP1	652.658	0.197838	0.197398	1.00223	0.316233	0.731248	0.550418
CA9	46.069	0.267471	0.605174	0.441975	0.658507	0.896158	0.674548
CAAP1	2664.3	0.328578	0.165729	1.98262	0.0474097	0.452359	0.340496
CAB39	5755.34	0.074124	0.0790606	0.937559	0.348471	0.751056	0.565328
CAB39L	197.926	-0.0842488	0.302223	-0.278764	0.780426	0.936326	0.704783
CABIN1	5101.99	0.0188884	0.131016	0.144168	0.885368	0.969053	0.729417
CABLES1	1089.86	0.313301	0.384444	0.814947	0.415103	0.783248	0.58956
CABLES2	759.662	0.167363	0.174637	0.958345	0.337889	0.743534	0.559666
CABYR	224.369	-0.14515	0.333257	-0.435551	0.663162	0.897133	0.675282
CACFD1	402.61	-0.922836	0.38208	-2.41529	0.0157225	0.315253	0.237294
CACHD1	1050.36	0.00492542	0.160878	0.0306158	0.975576	0.994265	0.748394
CACNA1A	181.442	0.0496185	0.295812	0.167737	0.86679	0.963746	0.725422
CACNA1C	31.1457	0.908909	2.77762	0.327226	0.743497	0.923687	0.69527
CACNA1D	409.24	-0.250769	0.630223	-0.397905	0.6907	0.908078	0.68352
CACNA2D1	1358.26	-0.493318	1.82181	-0.270785	0.786557	0.939245	0.70698
CACNA2D2	74.1469	-1.3853	0.550594	-2.51602	0.0118689	0.28595	0.215238
CACNA2D3	142.546	0.521421	0.716352	0.727884	0.466685	0.810674	0.610203
CACNB1	481.59	-0.102117	0.202467	-0.50436	0.614008	0.877526	0.660524
CACNB2	63.9229	-0.873384	0.332854	-2.62393	0.00869218	0.248973	0.187405
CACNB3	1600.86	0.350403	0.168432	2.08038	0.0374903	0.427585	0.321848
CACNG6	232.5	0.127095	0.579951	0.219149	0.826534	0.952357	0.71685
CACNG7	92.8548	-0.672884	0.591418	-1.13775	0.255226	0.687532	0.517513
CACNG8	1650.55	-0.171159	0.38174	-0.448364	0.65389	0.895296	0.673899
CACTIN-AS1	50.0797	-0.587976	0.467684	-1.25721	0.208678	0.653459	0.491866
CACTIN	2497.18	-0.0274078	0.126793	-0.216161	0.828862	0.95276	0.717153
CACUL1	5194.39	0.0904384	0.179742	0.503156	0.614855	0.878194	0.661026
CACYBP	12465.8	0.334423	0.15625	2.14031	0.0323299	0.409569	0.308287
CAD	14960.6	0.131137	0.205125	0.639304	0.522625	0.836884	0.629932
CADM1	4793.68	-0.398206	0.282523	-1.40946	0.158699	0.60936	0.458672
CADM2	72.621	-1.14934	0.618899	-1.85707	0.0633008	0.485228	0.365237
CADM3	337.828	0.231557	0.77232	0.29982	0.764314	0.931202	0.700926
CADM4	8790.52	-0.163394	0.278496	-0.586701	0.557405	0.853888	0.642731
CADPS2	789.534	-0.819811	1.16048	-0.706442	0.479913	0.817598	0.615415
CAHM	46.6039	-0.579159	0.425001	-1.36272	0.17297	0.622247	0.468372
CALB2	451.656	-0.846031	1.33245	-0.634946	0.525463	0.838365	0.631047
CALCOCO1	2885.56	-0.183627	0.272791	-0.673143	0.500856	0.824552	0.620649
CALCOCO2	5421.06	-0.0863417	0.150913	-0.57213	0.567234	0.857458	0.645418
CALCRL	57.3364	0.146837	0.389682	0.376812	0.706313	0.914095	0.688049
CALD1	8923	0.368851	0.176096	2.0946	0.0362063	0.420802	0.316742
CALHM2	2148.74	-0.159379	0.228265	-0.698217	0.485042	0.819459	0.616816
CALHM3	7.28041	0.0297542	0.662626	0.0449035	0.964184	0.991367	0.746213
CALM1	9316.67	0.310109	0.197806	1.56774	0.116942	0.568291	0.427759
CALM2	18507.3	0.48163	0.279949	1.72042	0.085356	0.5296	0.398636
CALM3	12055.8	0.0892478	0.108843	0.819968	0.412234	0.782145	0.588729
CALML4	584.621	-0.0630027	0.211799	-0.297464	0.766112	0.931613	0.701235
CALR	53413.3	0.210641	0.190961	1.10306	0.270002	0.698988	0.526136
CALU	25396.8	0.0298189	0.119168	0.250225	0.802414	0.943971	0.710538
CAMK1	160.492	0.10729	0.550082	0.195043	0.845359	0.958131	0.721196
CAMK2D	3149.76	-0.310318	0.158428	-1.95873	0.0501445	0.457801	0.344592
CAMK2G	1525.45	-0.108096	0.270293	-0.399923	0.689213	0.907758	0.683279
CAMK2N1	2285.87	0.122362	0.357103	0.34265	0.731861	0.922048	0.694036
CAMK2N2	201.817	-0.138092	0.289637	-0.476778	0.63352	0.886174	0.667033
CAMK4	2034.81	0.234506	0.189538	1.23725	0.215996	0.657507	0.494913
CAMKK1	238.259	0.134124	0.420007	0.319337	0.749471	0.925544	0.696667
CAMKK2	2823.43	0.059799	0.178622	0.334778	0.737792	0.922048	0.694036
CAMKMT	302.128	0.0243796	0.241226	0.101066	0.919498	0.978864	0.736802
CAMLG	3104.8	-0.386236	0.169497	-2.27871	0.0226841	0.363454	0.273576
CAMP	48.7486	-0.256957	0.578137	-0.444457	0.656712	0.896158	0.674548
CAMSAP1	4343.66	-0.164262	0.188318	-0.87226	0.383067	0.768521	0.578474
CAMSAP2	9347.54	0.186305	0.168383	1.10643	0.268539	0.697805	0.525245
CAMTA1	1398.26	0.106323	0.233436	0.455471	0.648771	0.893726	0.672717
CAMTA2	4030.49	0.0729206	0.184422	0.3954	0.692548	0.909013	0.684224
CAND1	14576.2	0.183971	0.129639	1.4191	0.155871	0.605947	0.456103
CAND2	206	-0.0786497	0.700787	-0.11223	0.910641	0.975883	0.734558
CANT1	5158.86	0.0431443	0.130999	0.329349	0.741892	0.922867	0.694652
CANX	52012.3	0.220191	0.171973	1.28038	0.200411	0.645117	0.485587
CAP1	21686.4	0.2093	0.137782	1.51906	0.128747	0.579013	0.435829
CAP2	886.868	0.490235	0.239032	2.05092	0.0402749	0.436626	0.328654
CAPG	3366.68	-0.543509	0.290192	-1.87293	0.0610781	0.481359	0.362325
CAPN1	6774.95	-0.0890324	0.153845	-0.578716	0.562781	0.855514	0.643955
CAPN10-AS1	135.619	-0.20997	0.292397	-0.718099	0.472696	0.814251	0.612896
CAPN10	1048.56	-0.238263	0.199716	-1.19301	0.232865	0.670145	0.504426
CAPN12	225.543	-0.947793	0.294099	-3.2227	0.0012699	0.0966489	0.0727487
CAPN14	61.768	0.483942	0.50757	0.953449	0.340363	0.744848	0.560655
CAPN15	5469.88	-0.245884	0.132954	-1.84939	0.0644016	0.487784	0.367161
CAPN2	17848.3	0.238226	0.259249	0.918905	0.358145	0.755151	0.568411
CAPN3	69.5897	-0.0126806	0.63104	-0.0200948	0.983968	0.996069	0.749752
CAPN5	5959.63	-0.177368	0.567693	-0.312437	0.754709	0.927954	0.698481
[truncated: 12,483 more rows]
