# Supplementary material for: A unified and self-reinforcing mechanism of tumor cell immortality
Source: Research Square preprint supplement (doi:10.21203/rs.3.rs-2849176/v1), 2023-05-25
Supplement: Supplementary file 5 [file e562233588be5b13cbd94c77.xlsx]

## Sheet: Sheet1
Protein	PTM	Epitope or immunogen	Company	Cat#	Species	Primary or Secondary	Clonality	Clone	Applications tested	Conjugated	Blocking	Probe	Dilution	WB MW (kDa)	RRID
GABPB1	N/A		ProteinTech	12597-1-AP	Rabbit	Primary	Polyclonal	N/A	WB	N/A	5% Milk	5% Milk	WB 1:2000	40-50	AB_10951115
GABPA	N/A		Santa Cruz	sc-22810	Rabbit	Primary	Polyclonal	N/A	WB	N/A	5% Milk	5% Milk	WB 1:500		AB_2247389
Anti-Rabbit IgG	N/A		Cell Signaling	7074	Goat	Secondary	Polyclonal	N/A	WB	HRP	N/A	5% Milk	WB 1:2000	N/A	AB_2099233
Anti-Mouse IgG	N/A		Cell Signaling	7076	Horse	Secondary	Polyclonal	N/A	WB	HRP	N/A	5% Milk	WB 1:2000	N/A	AB_330924
α-Actinin (D6F6)	N/A		Cell Signaling	6487	Rabbit	Primary	Monoclonal	D6F6	WB	N/A	5% Milk	5% BSA	WB: 1:2000	100	AB_11179206
