# Supplementary material for: A unified and self-reinforcing mechanism of tumor cell immortality
Source: Research Square preprint supplement (doi:10.21203/rs.3.rs-2849176/v1), 2023-05-25
Supplement: Supplementary file 6 [file eff524227df7a59d041613a2.xlsx]

## Sheet: A-375 B1TKO GO
File name = A375-MSigDB-Hallmark-2020-Q5-DESeq2
Term	P-value	Adjusted P-value	Odds Ratio	Combined Score	Genes
p53 Pathway	6.21e-07	3.1e-05	2.47926	35.4343	CYFIP2;RB1;PPP1R15A;CDKN1A;BTG2;RETSAT;CD82;CD81;ITGB4;AK1;RPS27L;TRIAP1;NDRG1;SEC61A1;HINT1;DRAM1;ZMAT3;PERP;SESN1;FDXR;RPL36;NUDT15;IER5;CTSD;IER3;RPS12;PHLDA3;IP6K2;HEXIM1;PLK3;GADD45A;SPHK1;BLCAP;PTPN14;DDB2;WRAP73;BMP2;MAPKAPK3;SP1;MDM2;FAS;PLXNB2;BAX;TP53;ISCU;HBEGF
DNA Repair	9.36e-06	0.000234	2.51869	29.163	GTF2A2;TSG101;ELL;GTF2B;CETN2;USP11;AK1;SUPT4H1;AAAS;ADCY6;NT5C;SEC61A1;POLD4;POLR2D;POLL;POLR2G;POLR2J;NELFE;DUT;RFC4;ADRM1;EDF1;GTF2H5;DDB2;POLA1;RRM2B;ERCC3;POLR3C;ERCC4;IMPDH2;ERCC2;POLR1D;HPRT1;TP53;ITPA
Reactive Oxygen Species Pathway	0.000527	0.0087801	3.29292	24.8572	SRXN1;GPX3;GLRX;SOD2;ATOX1;SOD1;PDLIM1;PRDX2;MSRA;HHEX;PRDX4;ERCC2;NDUFS2;HMOX2
Epithelial Mesenchymal Transition	0.000862	0.0107747	1.87519	13.2319	LRP1;LAMA3;TNFAIP3;FBLN1;AREG;RGS4;GLIPR1;NT5E;EFEMP2;LGALS1;GPC1;SPP1;SPOCK1;QSOX1;CD59;TIMP1;TNFRSF12A;GADD45A;BDNF;MMP1;IGFBP3;TPM2;ITGA2;APLP1;TFPI2;ACTA2;MMP14;DAB2;VCAN;SLC6A8;COL4A2;COL4A1;ID2;COL8A2;CALU;FAS;ITGA5
KRAS Signaling Up	0.00165872	0.0165872	1.81244	11.6027	PPP1R15A;NRP1;TNFAIP3;GLRX;CROT;PRDM1;PTGS2;HDAC9;PCSK1N;RELN;ADGRA2;SPP1;EPHB2;TSPAN1;PEG3;IGFBP3;ITGA2;AMMECR1;NAP1L2;GNG11;SNAP91;MMP10;EREG;DCBLD2;BTC;ALDH1A3;BMP2;NIN;ID2;IL1B;SPARCL1;ANGPTL4;LCP1;TRIB2;HBEGF;BIRC3
TNF-alpha Signaling via NF-kB	0.00309336	0.025778	1.7505	10.1152	PPP1R15A;BTG2;CDKN1A;BCL2A1;TNFAIP3;SLC2A3;PTGS2;AREG;DRAM1;KYNU;SLC16A6;IER5;LDLR;IER3;STAT5A;KDM6B;DUSP5;EGR2;SERPINB2;GADD45A;TIPARP;SPHK1;ZBTB10;SOD2;SERPINB8;EIF1;EHD1;BMP2;TUBB2A;ID2;IL1B;SQSTM1;BIRC2;HBEGF;BIRC3
Myogenesis	0.00977621	0.0698301	1.62899	7.53866	RB1;CAMK2B;CDKN1A;COL15A1;ITGB4;HSPB8;AK1;PSEN2;MYL6B;AEBP1;SYNGR2;GJA5;BAG1;IGFBP7;NCAM1;NOS1;SH3BGR;PDLIM7;ATP6AP1;ACSL1;GPX3;SPHK1;TPM2;IGFBP3;SMTN;SLC6A8;MYO1C;COL4A2;PKIA;FKBP1B;PLXNB2;MAPRE3;HBEGF
Apoptosis	0.0148293	0.092683	1.6595	6.9884	CDKN1A;BTG2;RETSAT;LEF1;PSEN2;PEA15;FDXR;TIMP1;DNM1L;BID;IER3;TNFRSF12A;GADD45A;GPX3;SOD2;PTK2;EREG;SOD1;DNAJA1;BMP2;IL1B;DPYD;PDCD4;BAX;FAS;SQSTM1;BIRC3
Complement	0.0271242	0.15069	1.51058	5.44914	DGKG;DOCK4;LRP1;TNFAIP3;PRCP;PLA2G7;C3;CTSL;KYNU;LAMP2;PIM1;CTSH;CD59;TIMP1;CTSD;CD55;DUSP5;SERPINB2;PRKCD;TFPI2;PLA2G4A;ATOX1;F5;EHD1;MMP14;F8;KIF2A;COL4A2;GPD2;IRF7;DGKH
UV Response Up	0.035204	0.17602	1.54677	5.17643	BTG2;SHOX2;RPN1;DDX21;CYB5R1;PDLIM3;HTR7;ACAA1;E2F5;BID;ATP6V1F;RFC4;GPX3;PRKCD;SOD2;PTPRD;DNAJA1;BMP2;MMP14;SLC6A8;EIF5;NAT1;CYP1A1;SQSTM1;SLC25A4
Estrogen Response Early	0.0429895	0.195407	1.45249	4.57069	FCMR;MAST4;PEX11A;HSPB8;RHOBTB3;FHL2;SLC1A4;NADSYN1;AREG;SLC7A2;SEC14L2;PDLIM3;FAM102A;RPS6KA2;TBC1D30;BAG1;LRIG1;SH3BP5;TFAP2C;KDM4B;SLC37A1;OPN3;TGIF2;TIPARP;ABCA3;GFRA1;SYT12;KRT15;BLVRB;GLA
heme Metabolism	0.0658882	0.274534	1.39513	3.79447	SLC22A4;ISCA1;BTG2;EPB41;HBB;MOSPD1;AGPAT4;C3;ALAD;PRDX2;NNT;LAMP2;E2F2;CIR1;CLIC2;EIF2AK1;NCOA4;ACSL6;RAD23A;SLC6A8;XK;SYNJ1;P4HA2;HMBS;BLVRB;TMCC2;ATG4A;TOP1;OPTN
Angiogenesis	0.0896771	0.340302	1.98136	4.77813	NRP1;VCAN;SPP1;STC1;TIMP1;PTK2;SERPINA5
Protein Secretion	0.0952845	0.340302	1.52126	3.57632	ARFGEF1;COPB2;CD63;TSG101;STX16;ICA1;SOD1;TOM1L1;VAMP7;SCRN1;LAMP2;DNM1L;SEC24D;GLA;AP2M1
Fatty Acid Metabolism	0.135092	0.450306	1.32906	2.6605	GABARAPL1;ADSL;RETSAT;MDH1;ACSL1;SDHD;MIF;ADIPOR2;ALAD;NSDHL;LGALS1;CPT2;GPD2;OSTC;TP53INP2;GPD1;CYP1A1;SUCLG2;ACAA1;PPARA;GLUL;METAP1
UV Response Dn	0.151184	0.461151	1.32483	2.50294	NRP1;WDR37;BDNF;CITED2;PRKCE;FHL2;ICA1;MRPS31;ACVR2A;RGS4;INPP4B;DLG1;DAB2;ARHGEF9;HAS2;AGGF1;AMPH;LDLR;MAP2K5;CDON
Coagulation	0.167858	0.461151	1.31123	2.34006	ARF4;SERPINB2;VWF;LRP1;MMP1;ITGA2;USP11;TFPI2;MMP10;DUSP14;C3;TF;MMP14;F8;LAMP2;CTSH;CD9;TIMP1;ISCU
Cholesterol Homeostasis	0.176848	0.461151	1.43313	2.48285	NSDHL;TNFRSF12A;ETHE1;TP53INP1;MAL2;CD9;ALDOC;LDLR;CPEB2;SREBF2;S100A11
Mitotic Spindle	0.186687	0.461151	1.23448	2.07186	PIF1;DOCK4;RABGAP1;EPB41;SMC3;EPB41L2;CNTRL;KNTC1;ARFGEF1;PLEKHG2;RFC1;ACTN4;DYNLL2;BCR;NET1;CCDC88A;DLG1;NIN;CENPJ;ALMS1;TAOK2;SASS6;NF1;CDC42EP1;TUBGCP3;KIF20B
Interferon Gamma Response	0.193684	0.461151	1.22732	2.01468	OGFR;CDKN1A;SAMD9L;EIF4E3;MVP;SPPL2A;SECTM1;TNFAIP3;NOD1;IFI35;PTGS2;PIM1;SLAMF7;B2M;STAT1;HLA-B;PLA2G4A;HLA-A;SOD2;ZNFX1;LATS2;OAS2;IRF7;PSME2;FAS;IRF9
Oxidative Phosphorylation	0.193684	0.461151	1.22732	2.01468	ISCA1;OAT;RETSAT;COX15;NDUFB1;MRPS30;NNT;ACAA1;NDUFV2;COX10;ATP6V1F;NDUFA8;ATP6V1G1;ATP6V0B;ATP6V0E1;MDH1;ATP6AP1;IMMT;SDHD;COX7A2L;NDUFS2;BAX;ATP6V0C;SLC25A4;ISCU;SLC25A6
Bile Acid Metabolism	0.233889	0.531565	1.26919	1.84401	PECR;RETSAT;ACSL1;PEX11A;ABCA3;DIO2;CROT;SOD1;CYP27A1;GNPAT;SULT1B1;PEX6;FDXR;OPTN;NUDT12
mTORC1 Signaling	0.259332	0.540276	1.17276	1.58281	PPP1R15A;RAB1A;CDKN1A;BTG2;NUFIP1;RPN1;STC1;SLC1A4;SLC2A3;GLRX;ADIPOR2;FDXR;SSR1;SLC37A4;LDLR;EDEM1;IMMT;MLLT11;UFM1;HMBS;CD9;HPRT1;SQSTM1;GAPDH;GLA
Glycolysis	0.259332	0.540276	1.17276	1.58281	COPB2;CITED2;RPE;STC1;GLRX;NOL3;NSDHL;NT5E;GPC1;QSOX1;SLC37A4;IER3;MDH1;CHPF2;IGFBP3;AKR1A1;MIF;SOD1;EXT2;VCAN;KIF2A;NASP;P4HA2;ANGPTL4;ALDH7A1
Hypoxia	0.420939	0.809498	1.06563	0.922057	PPP1R15A;CDKN1A;TIPARP;CITED2;IGFBP3;STC1;TNFAIP3;SLC2A3;GLRX;MIF;NDRG1;PLAC8;HOXB9;P4HA2;GPC1;PIM1;IDS;ALDOC;ANGPTL4;SLC37A4;GAPDH;IER3;TMEM45A
Estrogen Response Late	0.420939	0.809498	1.06563	0.922057	TFAP2C;OPN3;ABCA3;HSPB8;TFPI2;SLC1A4;LSR;CYP4F11;AREG;CXCL14;SERPINA5;PDLIM3;FAM102A;IMPA2;RPS6KA2;ID2;PERP;BAG1;PDCD4;BLVRB;CD9;HPRT1;GLA
Adipogenesis	0.511062	0.877591	1.01305	0.680022	STAT5A;COL15A1;CD151;RETSAT;GADD45A;GPX3;HSPB8;RMDN3;IMMT;FAH;ADIPOR2;ADCY6;SOD1;C3;CPT2;COL4A1;GPD2;UBC;DBT;PDCD4;SPARCL1;ANGPTL4
Apical Junction	0.511062	0.877591	1.01305	0.680022	VWF;ITGB4;ITGA2;LAMA3;WNK4;ACTN4;PTK2;MYL12B;CNN2;TRO;CDK8;MAPK11;CLDN4;DLG1;VCAN;NFASC;EPB41L2;TAOK2;ZYX;CERCAM;NF1;SYMPK
Apical Surface	0.529426	0.877591	1.05081	0.668276	GSTM3;FLOT2;ADIPOR2;MDGA1;DCBLD2
TGF-beta Signaling	0.542083	0.877591	1.02449	0.627334	PPP1R15A;FKBP1A;BMP2;ID2;MAP3K7;HIPK2
Hedgehog Signaling	0.560455	0.877591	1.02447	0.593174	NRP1;RTN1;NF1;UNC5C
Pperoxisome	0.585747	0.877591	0.969193	0.51839	GNPAT;RETSAT;ERCC3;ACSL1;PEX11A;PEX6;MVP;ACAA1;SOD2;SLC25A4;SOD1
IL-2/STAT5 Signaling	0.59228	0.877591	0.96655	0.506256	CYFIP1;NRP1;GABARAPL1;RNH1;CD81;APLP1;SPRY4;SLC2A3;FAH;NDRG1;HIPK2;NT5E;BMP2;SYNGR2;MYO1C;SPP1;PIM1;LRIG1;CAPN3;WLS;SLC29A2
Xenobiotic Metabolism	0.601808	0.877591	0.961096	0.48806	CYFIP2;GABARAPL1;RETSAT;SSR3;AKR1C2;FBLN1;CROT;FAH;CNDP2;CYP27A1;NFS1;PINK1;SERTAD1;ID2;KYNU;ATOH8;CYP1A1;FAS;BLVRB;HPRT1;GART
Androgen Response	0.658373	0.877591	0.910187	0.380444	INPP4B;ABCC4;ALDH1A3;ADAMTS1;NCOA4;ADRM1;ZBTB10;SEC24D;B2M;NDRG1
Wnt-beta Catenin Signaling	0.684134	0.877591	0.862421	0.327376	LEF1;PSEN2;AXIN2;TP53
E2F Targets	0.6885	0.877591	0.909771	0.339563	PRIM2;CDKN1A;DUT;RFC1;PRKDC;SMC6;PDS5B;SMC3;PAN2;PRDX4;MELK;NASP;CDK4;CHEK2;RAD21;ORC2;MCM3;PMS2;TP53;MXD3
Inflammatory Response	0.6885	0.877591	0.909771	0.339563	CDKN1A;BTG2;CD82;SEMA4D;SPHK1;ADRM1;SLC1A2;SLC7A2;ACVR2A;EREG;DCBLD2;MMP14;IL1B;IRF7;HAS2;TIMP1;ITGA5;LDLR;CD55;HBEGF
Unfolded Protein Response	0.696166	0.877591	0.883227	0.319876	TUBB2A;EDEM1;NHP2;SSR1;SRPRB;BANF1;SLC1A4;ATP6V0D1;ARFGAP1;EXOC2;YIF1A
PI3K/AKT/mTOR Signaling	0.717776	0.877591	0.86204	0.28585	VAV3;CDKN1A;DUSP3;CDK4;NOD1;PITX2;MAP3K7;SQSTM1;AP2M1;MAP2K6
Spermatogenesis	0.719624	0.877591	0.872519	0.287081	GSTM3;RFC4;PEBP1;SPATA6;GMCL1;SNAP91;CCT6B;IFT88;PCSK1N;GRM8;PHKG2;NOS1;TOPBP1
Interferon Alpha Response	0.740758	0.881855	0.837494	0.251316	OGFR;SAMD9L;IRF7;MVB12A;HLA-C;PSME2;IFI35;B2M;IRF9
IL-6/JAK/STAT3 Signaling	0.847839	0.965902	0.716184	0.118217	TNFRSF12A;STAT1;IL1B;PIM1;FAS;CD9;IRF9
Notch Signaling	0.877006	0.965902	0.545943	0.0716502	PSEN2;SKP1
Allograft Rejection	0.887679	0.965902	0.759441	0.0904837	RPS9;STAT1;HLA-A;HDAC9;ACVR2A;IL27RA;HLA-E;EREG;RPS19;IL1B;IRF7;FAS;TIMP1;APBB1;B2M;RPL39;MAP3K7
Myc Targets V2	0.88863	0.965902	0.606343	0.0715938	TCOF1;CDK4;NIP7;SLC29A2
G2-M Checkpoint	0.957032	0.990046	0.662162	0.0290814	PRIM2;CASP8AP2;ODF2;LIG3;PDS5B;FOXN3;SMC2;CUL4A;NASP;CDK4;RAD21;MCM3;E2F2;TOP1;KIF20B
Myc Targets V1	0.975931	0.990046	0.614376	0.0149686	PRPS2;DUT;RFC4;RPS6;DDX21;EEF1B2;PRDX4;CDK4;CLNS1A;IMPDH2;ORC2;NHP2;UBA2;HPRT1
KRAS Signaling Dn	0.987474	0.990046	0.567147	0.00714891	RYR2;BTG2;SERPINB2;THRB;SHOX2;COPZ2;DLK2;NR6A1;GDNF;KRT15;NOS1;SLC29A3;SPTBN2
Pancreas Beta Cells	0.990046	0.990046	0.209775	0.00209861	SRPRB

## Sheet: A-375 B1TKO GSEA
pathway	pval	padj	log2err	ES	NES	size	leadingEdge
HALLMARK_G2M_CHECKPOINT	2.63874e-18	1.31937e-16	1.10534	-0.545391	-2.58593	189	PDS5B|CASP8AP2|PRIM2|KIF20B|SMC2|TOP1|E2F2|RAD21|CUL4A|NASP|ODF2|MCM3|FOXN3|CDK4|LIG3|FANCC|EZH2|BCL3|CENPA|XPO1|RAD54L|NOTCH2|NEK2|PRPF4B|SMC1A|KIF22|CENPE|AURKA|E2F4|TTK|DBF4|SRSF10|GINS2|RACGAP1|STMN1|PBK|SLC7A1|CDKN3|LBR|SMAD3|SMARCC1|BARD1|PLK4|CCNF|KIF5B|POLQ|SUV39H1|EXO1|ESPL1|HNRNPU|CDKN2C|MARCKS|GSPT1|MTF2|BUB1|TMPO|CCNT1|CDC25B|BUB3|CENPF|TRAIP|SMC4|PRC1|POLE|CHEK1|KIF23|KATNA1|MKI67|FB…
HALLMARK_E2F_TARGETS	7.63746e-17	1.90936e-15	1.05746	-0.536487	-2.55678	194	PDS5B|MELK|DUT|CHEK2|SMC6|PRKDC|PRIM2|ORC2|SMC3|PAN2|PMS2|TP53|RAD21|MXD3|NASP|MCM3|RFC1|CDK4|E2F8|EZH2|HMGB2|DSCC1|XPO1|NUP107|DCK|RBBP7|NUP205|DIAPH3|SMC1A|KIF22|CENPE|NCAPD2|RFC2|AURKA|POLD1|RAD1|DNMT1|RACGAP1|CSE1L|STMN1|SSRP1|CDKN3|LBR|RAD51AP1|TRIP13|SPC24|MMS22L|SHMT1|DEK|ATAD2|BARD1|EXOSC8|DLGAP5|PLK4|CCP110|UNG|SUV39H1|HELLS|MCM4|ESPL1|CDKN2C|GSPT1|AK2|MSH2|TMPO|CDC25B|LIG1|UBE2T|NUDT21|…
HALLMARK_P53_PATHWAY	1.25505e-14	2.09175e-13	0.986546	0.502081	2.53442	175	CDKN1A|DDB2|TRIAP1|BLCAP|PLK3|SEC61A1|RETSAT|FDXR|AK1|ISCU|PLXNB2|CD82|BAX|NDRG1|PHLDA3|FAS|PERP|HBEGF|BTG2|MDM2|GADD45A|HINT1|CYFIP2|HEXIM1|RPL36|SESN1|IER5|ZMAT3|PPP1R15A|SPHK1|RPS27L|IP6K2|RPS12|DRAM1|IER3|CTSD|BMP2|MAPKAPK3|CD81|BTG1|IL1A|OSGIN1|ABHD4|TRAF4|XPC|BAIAP2|SAT1|TAX1BP3|FUCA1|JUN|TSPYL2|MXD4|GM2A|MXD1|CTSF|HMOX1|ABAT|ERCC5|EI24|IFI30|EPHX1|TAP1|S100A10|RAP2B|GLS2|TRAFD1|RNF19B|SERT…
HALLMARK_MITOTIC_SPINDLE	6.83558e-14	8.54448e-13	0.954542	-0.498885	-2.38258	196	CNTRL|DOCK4|NF1|PLEKHG2|CENPJ|NET1|EPB41L2|EPB41|ARFGEF1|DLG1|PIF1|SMC3|ACTN4|ALMS1|KIF20B|CCDC88A|TUBGCP3|RABGAP1|RFC1|KNTC1|NIN|SASS6|CDC42EP1|BCR|KIF3C|MYH10|ROCK1|PALLD|MARK4|NOTCH2|CEP192|NEK2|FARP1|SMC1A|KIF22|CENPE|ARHGAP10|AURKA|ARHGEF2|TTK|ITSN1|DST|RAPGEF5|RACGAP1|NEDD9|RHOF|LATS1|PCNT|ARHGEF7|CKAP5|SYNPO|STAU1|DLGAP5|KIF5B|GSN|ESPL1|MARCKS|BCL2L11|BUB1|ECT2|CLIP2|EZR|ARHGAP4|CENPF|HOOK…
HALLMARK_TNFA_SIGNALING_VIA_NFKB	9.68107e-14	9.68107e-13	0.954542	0.484072	2.42937	173	PTGS2|CDKN1A|TIPARP|BCL2A1|SQSTM1|HBEGF|BTG2|EGR2|GADD45A|BIRC3|KDM6B|SLC16A6|KYNU|TNFAIP3|IER5|SERPINB8|IL1B|PPP1R15A|EIF1|SPHK1|BIRC2|TUBB2A|DRAM1|DUSP5|AREG|ID2|SOD2|IER3|BMP2|SERPINB2|EHD1|NR4A3|BTG1|IL1A|RELB|CCND1|SDC4|CLCF1|GEM|DUSP1|SAT1|DDX58|IFIH1|TANK|MAFF|JUN|TGIF1|MXD1|NFE2L2|PHLDA2|PMEPA1|JAG1|SLC2A6|EFNA1|NFKBIA|TAP1|JUNB|BCL6|PTGER4|RNF19B|NFKBIE|INHBA|NFIL3|NAMPT|LAMB3|NFKB1|RELA…
HALLMARK_EPITHELIAL_MESENCHYMAL_TRANSITION	3.64176e-09	3.0348e-08	0.774939	0.42127	2.11418	173	CD59|ACTA2|APLP1|VCAN|IGFBP3|SLC6A8|MMP1|LGALS1|RGS4|FAS|TNFRSF12A|SPOCK1|GADD45A|GPC1|ITGA5|ITGA2|CALU|TNFAIP3|TFPI2|TIMP1|TPM2|GLIPR1|BDNF|LRP1|AREG|ID2|QSOX1|MMP14|SPP1|NT5E|FZD8|LAMA1|SDC4|GEM|FLNA|SAT1|PTHLH|FSTL3|ECM1|FUCA1|COL11A1|PDLIM4|WNT5A|JUN|PFN2|MATN2|CDH11|ITGB1|PLOD1|PMEPA1|THY1|PCOLCE2|GJA1|PPIB|FBLN5|FBN1|SNAI2|INHBA|MAGEE1|SPARC|PLAUR|TGFBI|CAPG|SERPINE1|COL5A1|SGCB|CDH6|ADAM12…
HALLMARK_KRAS_SIGNALING_UP	1.172e-08	8.37142e-08	0.74774	0.449691	2.18192	140	PTGS2|PEG3|PCSK1N|MMP10|RELN|GLRX|IGFBP3|NAP1L2|NRP1|GNG11|HBEGF|BIRC3|LCP1|DCBLD2|AMMECR1|ITGA2|SPARCL1|TNFAIP3|IL1B|PPP1R15A|CROT|ID2|TSPAN1|BTC|HDAC9|ANGPTL4|SNAP91|BMP2|EREG|PRDM1|SPP1|EPHB2|TMEM158|PLAT|CTSS|CAB39L|FUCA1|CPE|PECAM1|SCG3|DUSP6|KCNN4|GPRC5B|EPB41L3|SPON1|INHBA|DNMBP|PLAUR|MAFB|TSPAN7|APOD|TRIB1|KLF4|YRDC|TRAF1|FBXO4|CCND2|RBM4|SATB1|SOX9
HALLMARK_HYPOXIA	4.70186e-08	2.93867e-07	0.719513	0.407411	2.03864	167	CDKN1A|STC1|IDS|TIPARP|TMEM45A|GLRX|IGFBP3|NDRG1|GPC1|GAPDH|P4HA2|TNFAIP3|PPP1R15A|MIF|IER3|ALDOC|ANGPTL4|CITED2|KDM3A|BTG1|NCAN|HEXA|DTNA|TPI1|SDC4|HDLBP|DUSP1|ALDOA|KLF7|MAFF|JUN|AMPD3|LDHA|NAGK|GAA|P4HA1|HMOX1|XPNPEP1|EFNA1|SLC25A1|KIF5A|TGFB3|NR3C1|GRHPR|KDELR3|EFNA3|BNIP3L|NFIL3|PLIN2|ATP7A|PLAUR|TGFBI|INHA|SERPINE1|RORA|COL5A1|GBE1|ATF3|ENO2|CHST2|NDST1|LDHC
HALLMARK_COAGULATION	1.52116e-06	8.4509e-06	0.643552	0.471925	2.14803	90	C3|MMP10|CTSH|MMP1|ISCU|ARF4|DUSP14|ITGA2|LAMP2|TFPI2|TIMP1|LRP1|VWF|MMP14|TF|SERPINB2|CD9|F8|A2M|ACOX2|PLAT|CPQ|RABIF|S100A13|KLF7|MAFF|CLU|PECAM1|DUSP6|CTSB|MSRB2|FBN1|C1R|SPARC|CASP9|ANG|SERPINE1|FURIN|FYN|BMP1|LGMN
HALLMARK_COMPLEMENT	2.31699e-06	1.15849e-05	0.627257	0.40115	1.95086	141	CD59|PLA2G7|C3|CTSH|DGKG|PLA2G4A|PRKCD|F5|PRCP|KYNU|CTSL|LAMP2|TNFAIP3|TFPI2|TIMP1|LRP1|CD55|DUSP5|CTSD|MMP14|SERPINB2|F8|EHD1|ATOX1|PLAT|CPQ|RABIF|CTSS|S100A13|CTSC|MAFF|GNAI2|CLU|SCG3|LGALS3|DUSP6|LIPA|XPNPEP1|CTSB|GMFB|STX4|PCLO|C1R|SPOCK2|PHEX|PLAUR|CASP9|GCA|ANG|SERPINE1|USP16|BRPF3|FYN|CALM1|LGMN
HALLMARK_INTERFERON_GAMMA_RESPONSE	4.63031e-06	2.10469e-05	0.610527	0.387171	1.90352	152	PTGS2|CDKN1A|SECTM1|SLAMF7|ZNFX1|MVP|PLA2G4A|FAS|IFI35|HLA-B|EIF4E3|HLA-A|PSME2|IRF9|B2M|TNFAIP3|OAS2|STAT1|OGFR|SOD2|SAMD9L|MYD88|OASL|BTG1|HLA-DMA|CD74|TRIM21|DDX58|IFIH1|TAPBP|STAT3|NLRC5|HLA-DRB1|PSME1|IFI30|IL4R|NFKBIA|IFIT1|TAP1|LGALS3BP|TRAFD1|UBE2L6|C1R|RTP4|NAMPT|IRF5|NFKB1|ISG15|CMTR1|CIITA|PNP|MX1|ST3GAL5|SAMHD1|VAMP8|TRIM25|PSMB10|LY6E|IRF1|SLC25A28|DHX58|METTL7B|ICAM1|RIPK1|XAF1
HALLMARK_HEME_METABOLISM	1.85771e-05	7.74048e-05	0.57561	0.363871	1.81113	162	PRDX2|C3|SLC6A8|CLIC2|BLVRB|MOSPD1|NCOA4|BTG2|ISCA1|P4HA2|TMCC2|XK|LAMP2|ATG4A|SLC22A4|ACSL6|OPTN|HBB|MGST3|TRAK2|SLC30A1|CLCN3|BSG|HTATIP2|PPP2R5B|ENDOD1|LMO2|UROS|HAGH|ERMAP|ABCB6|UROD|GDE1|AQP3|MPP1|RHCE|NUDT4|SLC10A3|RBM5|ARL2BP|RNF123|FBXO9|PGLS|YPEL5|NARF|CTSB|NFE2L1|NR3C1|HEBP1|ABCG2|ATP6V0A1|BNIP3L|FECH|SLC25A38|KHNYN|LRP10
HALLMARK_UV_RESPONSE_UP	3.78457e-05	0.00014556	0.557332	0.378993	1.82665	133	SLC6A8|CYB5R1|SQSTM1|CYP1A1|ACAA1|PRKCD|BTG2|GPX3|RPN1|NAT1|SLC25A4|DNAJA1|PTPRD|EIF5|SOD2|ATP6V1F|MMP14|HTR7|BMP2|BTG1|NKX2-5|BSG|ALDOA|UROD|NXF1|TMBIM6|AQP3|NPTX2|RXRB|GRINA|HMOX1|OLFM1|PRKACA|HSPA13|MGAT1|EPHX1|NFKBIA|TAP1|JUNB|ALAS1|HYAL2|CREG1|ATP6V1C1|WIZ|FURIN|MRPL23|BTG3|CLTB|ATF3|ENO2|SIGMAR1|TCHH|IRF1|CNP|RHOB|IL6ST|GAL|PPIF|FOSB|ICAM1
HALLMARK_APOPTOSIS	0.000106189	0.000379247	0.538434	0.362643	1.76308	138	CDKN1A|RETSAT|FDXR|SQSTM1|BAX|FAS|BTG2|TNFRSF12A|GADD45A|BIRC3|GPX3|PSEN2|DNAJA1|TIMP1|IL1B|SOD1|PEA15|SOD2|IER3|BMP2|EREG|IL1A|CCND1|PLAT|PPP2R5B|SAT1|JUN|CLU|LGALS3|CYLD|LMNA|SC5D|HMOX1|BCAP31|BCL2L2|IGFBP6|TAP1|BMF|CCNA1|DNAJC3|BNIP3L|RELA|MCL1|CASP9|BTG3|CCND2|ATF3|ENO2|SATB1|IGF2R|EGR3
HALLMARK_INFLAMMATORY_RESPONSE	0.000254224	0.000847414	0.498493	0.35872	1.70469	124	CDKN1A|HAS2|CD82|HBEGF|ADRM1|BTG2|ITGA5|DCBLD2|TIMP1|SLC1A2|IL1B|SPHK1|CD55|MMP14|EREG|IL1A|TAPBP|ADGRE1|IL10|AHR|MXD1|SLC4A4|SLC31A2|HRH1|IL4R|NFKBIA|IFNAR1|GPR132|PTGER4|TLR1|INHBA|RTP4|NAMPT|NFKB1|RELA|PLAUR|SERPINE1|PCDH7|IRAK2|TNFSF9|RNF144B|CHST2|EMP3|LIF|PTPRE|LY6E|ITGB8|IRF1|LPAR1|CXCL8|EBI3|ICAM1|RASGRP1|TNFRSF9|RGS16
HALLMARK_OXIDATIVE_PHOSPHORYLATION	0.000334494	0.00104529	0.498493	0.321932	1.63581	182	ATP6V0E1|RETSAT|ISCU|ATP6V1G1|BAX|ACAA1|ATP6V0C|NDUFA8|ISCA1|COX7A2L|ATP6AP1|SLC25A6|SLC25A4|NDUFV2|ATP6V0B|OAT|ATP6V1F|NDUFB1|MGST3|NDUFA1|NDUFA4|COX4I1|ACADVL|SLC25A12|CYCS|COX7B|MAOB|AIFM1|MPC1|LDHA|ACO2|NDUFC2|NDUFS8|SLC25A20|UQCRB|UQCRQ|IDH3G|ATP1B1|NDUFS6|ALAS1|POLR2F|HADHB|COX7C|ETFB|COX6C|TOMM22|ATP6V1C1|NDUFB4|UQCR11|TIMM17A|MFN2|UQCRH|CYB5R3|ACADSB|MRPS12|POR|TIMM10|ATP6V1D|ECHS1|DLD|FX…
HALLMARK_REACTIVE_OXYGEN_SPECIES_PATHWAY	0.000783538	0.00230452	0.477271	0.483911	1.88343	42	PRDX2|HMOX2|GLRX|GPX3|SRXN1|SOD1|PRDX4|MSRA|SOD2|ATOX1|TXNRD1|G6PD|MGST1|PRNP|MBP|FTL|JUNB|LAMTOR5|NDUFB4|PRDX1
HALLMARK_MYOGENESIS	0.00132889	0.00369135	0.45506	0.332626	1.60733	134	CDKN1A|NCAM1|IGFBP3|SLC6A8|AK1|MAPRE3|PLXNB2|NOS1|BAG1|CAMK2B|HBEGF|PDLIM7|GPX3|ATP6AP1|PSEN2|HSPB8|PKIA|TPM2|SPHK1|SYNGR2|SMTN|ACSL1|SH3BGR|DTNA|PDE4DIP|MRAS|CLU|NAV2|PRNP|ITGB1|GAA
HALLMARK_MYC_TARGETS_V2	0.00254104	0.00668694	0.431708	-0.428642	-1.67674	58	NIP7|TCOF1|CDK4|SLC29A2|DDX18|MYBBP1A|PLK4|EXOSC5|IPO4|UNG|MCM4|RABEPK|NOP2|TBRG4|UTP20|NOLC1|MYC|PLK1|FARSA|GRWD1|PPRC1|MCM5|SRM|RRP12|SLC19A1|RCL1|LAS1L|PUS1|IMP4|HK2|TFB2M|PA2G4|DCTPP1|MAP3K6|PRMT3
HALLMARK_MTORC1_SIGNALING	0.00500443	0.0125111	0.407018	0.284062	1.44349	188	CDKN1A|STC1|GLRX|FDXR|RAB1A|SQSTM1|BTG2|GAPDH|MLLT11|RPN1|SLC1A4|PPP1R15A|HPRT1|SSR1|EDEM1|CD9|GLA|UFM1|CALR|TXNRD1|PSMD13|ARPC5L|TPI1|HMGCS1|CANX|ALDOA|FKBP2|CTSC|USO1|G6PD|GTF2H1|LDHA|SC5D|P4HA1|SERP1
HALLMARK_ALLOGRAFT_REJECTION	0.0053407	0.0127159	0.407018	0.330696	1.54157	108	FAS|HLA-E|HLA-A|RPL39|RPS19|APBB1|B2M|TIMP1|IL1B|RPS9|STAT1|HDAC9|EREG|HLA-DMA|CD74|IL11|CTSS|FLNA|HLA-DRA|TAPBP|IL10|DYRK3|DEGS1|THY1|NME1|RPL9|IL4R|TAP1|CD47|CD96|TLR1|INHBA
HALLMARK_CHOLESTEROL_HOMEOSTASIS	0.00614349	0.0139625	0.407018	0.366331	1.59606	70	TP53INP1|TNFRSF12A|ETHE1|S100A11|NSDHL|MAL2|CPEB2|ALDOC|CD9|HMGCS1|PMVK|ATF5|CLU|CXCL16|LGALS3|ALCAM|SC5D|ACTG1|JAG1|ABCA2|NFIL3|PCYT2|PLAUR|HMGCR|GNAI1|ATF3|LGMN|ANTXR2|EBP|STX5|LSS|FBXO6|FABP5
HALLMARK_GLYCOLYSIS	0.00658752	0.0143207	0.407018	0.28577	1.43854	174	STC1|VCAN|GLRX|IGFBP3|NOL3|CHPF2|GPC1|P4HA2|EXT2|SOD1|NSDHL|COPB2|MIF|QSOX1|IER3|ANGPTL4|CITED2|NT5E|B4GALT7|GMPPB|GMPPA|TPI1|HDLBP|ALDOA|ABCB6|G6PD|CHST12|LDHA|PKM|PLOD1|P4HA1|ALG1|PGLS|B4GALT4|CHPF|GFPT1|KDELR3|EFNA3|SLC16A3|SRD5A3|TGFBI|ANG|DSC2|NDUFV3|COL5A1|ENO2|SOX9|CHST2|LDHC|AGRN|SPAG4|PPIA
HALLMARK_INTERFERON_ALPHA_RESPONSE	0.0146865	0.030597	0.38073	0.323996	1.44741	82	IFI35|PSME2|IRF9|B2M|HLA-C|OGFR|SAMD9L|OASL|SAMD9|CD74|TRIM21|IFIH1|PSME1|IFI30|IL4R|UBA7|TAP1|LGALS3BP|TRAFD1|CD47|UBE2L6|RTP4|ISG15|CMTR1|MX1|TRIM25|LY6E|IRF1|CNP|SLC25A28|DHX58|TDRD7|CSF1|IFIT2|CASP8|ADAR

## Sheet: UM-UC-3 B1TKO GO
File name = UMUC3-MSigDB-Q5-Hallmark-2020-DESeq2
Term	P-value	Adjusted P-value	Odds Ratio	Combined Score	Genes
E2F Targets	5.44e-22	2.72e-20	4.00918	196.304	DCLRE1B;NUP107;DSCC1;CSE1L;BUB1B;PNN;PTTG1;CHEK2;CHEK1;STMN1;KPNA2;TMPO;TIPIN;LIG1;HUS1;CDC25A;DDX39A;MELK;MSH2;TIMELESS;SRSF2;ASF1B;SNRPB;DNMT1;RNASEH2A;CDCA3;PRKDC;SHMT1;AK2;CDCA8;NOLC1;RAD51AP1;CCNB2;RACGAP1;UBR7;ORC2;LYAR;PLK4;XRCC6;PLK1;NUP153;PA2G4;PAICS;PAN2;POLA2;NASP;UBE2S;CDK4;HNRNPD;MXD3;EZH2;CDKN1B;MCM7;SUV39H1;HMGB2;HMGB3;BRCA1;CKS1B;LMNB1;MYBL2;TK1;POLE;TCF19;HELLS;RFC3;RFC2;TUBB;CT…
Myc Targets V1	6.5e-14	1.63e-12	2.94287	89.3584	EIF4A1;HNRNPU;HNRNPR;PHB2;RPL6;UBE2L3;PSMD8;EEF1B2;PSMD7;SNRPD2;TRIM28;SNRPD1;RUVBL2;PSMD1;SNRPD3;TXNL4A;KPNA2;SMARCC1;IFRD1;CLNS1A;VDAC3;SRSF2;SNRPG;NHP2;SRSF3;VDAC1;ERH;HPRT1;PPIA;SRSF7;PSMD14;NOLC1;LDHA;PCBP1;G3BP1;ORC2;CYC1;XRCC6;GOT2;PA2G4;EIF2S2;SRPK1;LSM2;LSM7;CDK4;CDK2;HNRNPD;EIF4G2;YWHAE;SLC25A3;HSP90AB1;MCM7;RPLP0;C1QBP;DHX15;CCT3;CCT2;RFC4;CTPS1;NME1;PSMA4;TFDP1;PSMA1;PSMA2;CANX;TCP1;M…
G2-M Checkpoint	5.51e-13	9.19e-12	2.82586	79.7641	CCNF;HNRNPU;RPS6KA5;PTTG1;SNRPD1;KIF5B;CHEK1;STMN1;CDC27;NEK2;FBXO5;KPNA2;HMGN2;TMPO;SMARCC1;HUS1;CDC25A;TRAIP;SAP30;DDX39A;EWSR1;NCL;SRSF2;ATF5;CUL3;NOLC1;RASAL2;EFNA5;HIF1A;CCNB2;RACGAP1;G3BP1;PLK4;HSPA8;DR1;TGFB1;SMAD3;UBE2C;PLK1;CBX1;FOXN3;NDC80;TPX2;POLA2;NASP;UBE2S;CDK4;HNRNPD;EZH2;CDKN1B;NUMA1;SUV39H1;AMD1;HMGB3;KIF15;LMNB1;CKS1B;CHAF1A;EXO1;CHMP1A;MYBL2;POLE;RBM14;ATRX;KIF23;KIF22;SMC1A;S…
mTORC1 Signaling	1.29e-09	1.61e-08	2.4029	49.1833	GPI;CCNF;SLC2A1;ENO1;SLC7A11;IFI30;TM7SF2;NAMPT;ME1;PHGDH;CTSC;PGM1;TPI1;IFRD1;ELOVL6;CACYBP;TUBG1;CDC25A;SYTL2;SLC7A5;PSMA3;DDX39A;PSMA4;DDIT3;PSME3;HMBS;CANX;MCM4;TRIB3;HPRT1;EEF1E1;BCAT1;SQSTM1;PPIA;GAPDH;SKAP2;MCM2;PPP1R15A;PSMD14;SHMT2;USO1;SLC1A5;ADD3;ADIPOR2;ACACA;UNG;HSP90B1;AURKA;HSPD1;GGA2;SLC9A3R1;STIP1;LDHA;PSMB5;NFIL3;PRDX1;LTA4H;YKT6;LDLR;ATP6V1D;SEC11A;CYB5B;XBP1;SDF2L1;HSPA5;PNO1;…
DNA Repair	7.26e-08	7.26e-07	2.44576	40.2034	FEN1;ZNRD1;MRPL40;GUK1;NELFCD;POLH;RFC5;RFC3;RFC4;LIG1;RFC2;VPS37D;NME4;EDF1;RBX1;DDB2;NME1;APRT;NT5C3A;BCAM;RRM2B;NFX1;POLR1D;HPRT1;SRSF6;UMPS;EIF1B;GTF2A2;PCNA;CANT1;GTF3C5;CSTF3;PRIM1;USP11;DCTN4;COX17;AAAS;TYMS;ADCY6;POLD3;POLD4;POLD1;POLR2D;POLR2E;POLR2F;POLR2G;POLR2H;STX3;POLR2K;BCAP31;SURF1;DUT;TAF12;ALYREF;TAF10;UPF3B;GTF2H1;SSRP1;SUPT5H;ZWINT;TARBP2;GTF2H5;POLE4;POLA1;NUDT21;POLA2;RAD51;…
Mitotic Spindle	1.44e-07	1.2e-06	2.14569	33.8081	CEP57;YWHAE;NUMA1;ITSN1;WASL;ARHGAP5;KIF15;ARHGAP4;LMNB1;PPP4R2;KIF5B;CDC27;NCK2;TLK1;KIF1B;NEK2;KNTC1;FBXO5;KIFAP3;SPTAN1;NCK1;PLEKHG2;CEP131;KIF23;TSC1;ACTN4;KIF22;SMC1A;CD2AP;BCR;TIAM1;CLIP2;ALS2;ESPL1;INCENP;PALLD;ARHGEF3;GEMIN4;MYH9;BIRC5;ATG4B;ARHGEF2;EZR;MAPRE1;VCL;ARF6;PIF1;TUBGCP2;RASAL2;HDAC6;AURKA;CDC42;CCNB2;RHOT2;BCL2L11;RACGAP1;KIF3B;EPB41L2;KATNA1;STK38L;CEP192;FLNB;PCNT;MARK4;MYH1…
Unfolded Protein Response	1.99e-07	1.42e-06	2.69357	41.5638	EIF4A1;EIF4A3;IFIT1;HERPUD1;CKS1B;EDC4;RPS14;KHSRP;KIF5B;BANF1;CHAC1;TSPYL2;IMP3;SLC30A5;WIPI1;ERN1;DNAJC3;SLC7A5;NHP2;GEMIN4;ATF6;DCP2;EXOC2;CEBPB;SHC1;GOSR2;CEBPG;NOLC1;SDAD1;HSP90B1;EXOSC5;EXOSC4;EXOSC9;EIF4EBP1;DNAJB9;SEC11A;SEC31A;PAIP1;NOP56;XBP1;NOP14;HSPA5;NFYA;FUS;EIF2AK3;LSM1;ASNS;LSM4;VEGFA;SPCS1;PSAT1;SRPRB;NABP1;HYOU1;CALR;DCP1A;EIF4G1
Oxidative Phosphorylation	3.54e-06	2.22e-05	1.95803	24.5733	GPI;COX7B;SLC25A3;ECI1;MRPS11;COX6A1;PHB2;COX7C;MRPL35;MTRF1;MPC1;IDH3B;UQCRFS1;PMPCA;COX8A;BCKDHA;PDHX;PHYH;ATP6AP1;MRPS22;NDUFC2;NDUFC1;SDHD;SDHB;COX6B1;SUPV3L1;OXA1L;NDUFS8;NDUFS6;VDAC3;NDUFS3;VDAC2;VDAC1;NDUFS1;NDUFB8;ECHS1;NDUFB7;UQCRB;NDUFB6;ABCB7;TIMM9;COX17;NDUFB3;TIMM13;NDUFB2;NDUFB1;UQCR11;COX7A2;UQCR10;MRPS30;PDHB;COX5B;HSD17B10;UQCRH;MRPL11;ACAT1;LDHB;LDHA;RHOT2;CYB5R3;RHOT1;COX11;POL…
Adipogenesis	7.02e-06	3.9e-05	1.91782	22.759	SCARB1;COX7B;SLC27A1;MTCH2;RNF11;SOWAHC;ITSN1;ARAF;COX6A1;GPHN;LIPE;CPT2;ALDH2;DBT;ME1;HADH;PGM1;HIBCH;COX8A;BCKDHA;PHYH;TALDO1;ELOVL6;ATP1B3;LIFR;CMBL;SDHB;SLC5A6;COL4A1;ACOX1;RAB34;NDUFS3;ITGA7;PPARG;PLIN2;SLC25A10;TKT;RTN3;ECHS1;CD151;NDUFB7;AK2;BAZ2A;ABCB8;UQCR11;UQCR10;SLC1A5;TANK;ADIPOR2;ADCY6;AGPAT3;C3;SAMM50;DDT;DHRS7B;UBC;DNAJB9;APOE;CYC1;DRAM2;SLC19A1;MAP4K3;DECR1;PTCD3;CDKN2C;ANGPT1;FZ…
Myc Targets V2	0.000232	0.00116063	2.63772	22.0731	NIP7;NOLC1;RABEPK;IPO4;SRM;TBRG4;HSPD1;UNG;EXOSC5;TCOF1;PES1;UTP20;RRP12;MAP3K6;SLC19A1;PLK4;NOP56;PRMT3;PLK1;TFB2M;PA2G4;HSPE1;SUPV3L1;MYBBP1A;LAS1L;CDK4;GRWD1;MCM4;MCM5
Protein Secretion	0.000977	0.00444194	1.96707	13.6334	STX12;ARF1;COPB1;VPS4B;GOSR2;USO1;ICA1;ATP1A1;CLCN3;LMAN1;SNX2;LAMP2;AP2S1;KIF1B;YKT6;AP2M1;SH3GL2;CTSC;SEC31A;TPD52;MON2;STX7;COG2;OCRL;AP2B1;STAM;SCAMP1;ARFGAP3;SCAMP3;IGF2R;SOD1;GALC;KRT18;GNAS;YIPF6;ERGIC3;VAMP4;SEC24D;RAB5A;GLA;BET1
TGF-beta Signaling	0.00246601	0.0102751	2.27224	13.6452	BCAR3;PPP1R15A;SLC20A1;XIAP;MAP3K7;SKIL;SPTBN1;ACVR1;TGIF1;KLF10;TGFB1;SMAD3;TGFBR1;SMAD7;HIPK2;PPP1CA;SKI;FKBP1A;CDK9;PPM1A;BMP2;APC;ID2;CTNNB1;TRIM33
Wnt-beta Catenin Signaling	0.00434693	0.0159787	2.39516	13.0256	JAG2;HDAC5;NOTCH1;JAG1;WNT5B;PTCH1;LEF1;TCF7;HDAC11;PSEN2;RBPJ;NKD1;GNAI1;NCSTN;KAT2A;ADAM17;DVL2;NUMB;CTNNB1;SKP2
Apoptosis	0.00447404	0.0159787	1.56803	8.4822	IFITM3;CDKN1B;HMGB2;HSPB1;BRCA1;ENO2;SAT1;LGALS3;TSPO;TIMP3;TIMP1;SPTAN1;BNIP3L;GPX1;PPP2R5B;EREG;DNAJC3;CCNA1;DDIT3;FEZ1;IRF1;MADD;RARA;VDAC2;TXNIP;SQSTM1;DAP3;RNASEL;DIABLO;SLC20A1;LEF1;PSEN2;XIAP;BCL10;PSEN1;RELA;PPP3R1;RHOT2;BCL2L11;LMNA;HMOX1;BMF;BID;BCAP31;CREBBP;GCH1;IGF2R;SMAD7;SOD1;DNAJA1;CYLD;DAP;BMP2;WEE1;KRT18;CTH;CDK2;BAX;CTNNB1;BCL2L2
p53 Pathway	0.0181289	0.0604296	1.38967	5.57294	CYFIP2;CCNK;CSRNP2;STEAP3;BTG1;CD81;RNF19B;ABAT;SLC7A11;IFI30;SAT1;HINT1;CCND3;GM2A;KIF13B;UPP1;NUDT15;IER5;POLH;TSPYL2;VWA5A;FOS;CGRRF1;PRKAB1;DDB2;RAD51C;DDIT3;TXNIP;TRIB3;TAX1BP3;S100A4;PPP1R15A;CEBPA;PCNA;NOTCH1;ABHD4;PVT1;EI24;RGS16;HSPA4L;TGFA;RPS27L;NOL8;SLC3A2;FOXO3;RCHY1;ACVR1B;CDKN2AIP;LDHB;DRAM1;IRAK1;ZMAT3;HMOX1;S100A10;JAG2;TGFB1;OSGIN1;LIF;TPRKB;INHBB;KLF4;BAIAP2;BMP2;CCNG1;SDC1;PLX…
Cholesterol Homeostasis	0.0196863	0.0615197	1.69799	6.6694	ACSS2;SEMA3B;HSD17B7;ACAT2;GNAI1;TM7SF2;LGALS3;NSDHL;ALCAM;NFIL3;LDLR;ABCA2;PCYT2;JAG1;GPX8;LSS;SREBF2;PNRC1;FABP5;SCD;FASN;CD9;CTNNB1;TRIB3;PPARG;DHCR7;ATF5;CPEB2;LGMN
heme Metabolism	0.0261087	0.0767904	1.35882	4.95354	PIGQ;SLC2A1;SLC7A11;NR3C1;BACH1;NUDT4;ALAD;HEBP1;PSMD9;CCND3;CDC27;LAMP2;ERMAP;TNS1;BNIP3L;KHNYN;GLRX5;NCOA4;PPP2R5B;VEZF1;BPGM;SPTB;MINPP1;BCAM;DAAM1;TFDP2;HMBS;BLVRB;TRIM58;OPTN;BLVRA;OSBP2;USP15;MOSPD1;FOXO3;PPOX;CLCN3;RAP1GAP;ADD2;C3;PRDX2;SEC14L1;MXI1;TSPAN5;E2F2;DCAF10;DCAF11;CDR2;SMOX;EIF2AK1;NEK7;FOXJ2;ASNS;KLF3;UBAC1;SLC25A38;ALDH6A1;GCLC;SLC6A9;ARL2BP;SYNJ1;MKRN1;TCEA1;TMCC2;HDGF;YPEL5;…
PI3K/AKT/mTOR Signaling	0.03274	0.0909444	1.49454	5.11008	ATF1;ARF1;CDKN1B;PRKAA2;CAB39;YWHAB;PRKAG1;SLC2A1;NOD1;ACACA;HSP90B1;RPTOR;MKNK1;CFL1;E2F1;AKT1;MAP3K7;AP2M1;NCK1;SMAD2;PLA2G12A;PPP1CA;FGF17;TIAM1;RIT1;CDK4;ARPC3;DDIT3;CAMK4;CSNK2B;CDK2;UBE2N;TRIB3;GRB2;CALR;PFN1;SQSTM1;NFKBIB
UV Response Dn	0.0351423	0.092171	1.40211	4.69475	PHF3;NRP1;CDKN1B;IRS1;CITED2;ICA1;LAMC1;NR3C1;SYNE1;SIPA1L1;DBP;ZMIZ1;SLC22A18;CDON;WDR37;ANXA2;MIOS;ANXA4;ATRX;DYRK1A;ARHGEF9;PLCB4;MMP16;PPARG;MRPS31;SRI;ADD3;ATP2C1;LTBP1;KALRN;SLC7A1;FBLN5;APBB2;LDLR;MAP2K5;CAP2;SMAD3;FZD2;RBPMS;BDNF;NEK7;ATP2B4;NR1D2;SYNJ2;NFKB1;SMAD7;COL1A1;NFIB;DLC1;BHLHE40
TNF-alpha Signaling via NF-kB	0.0368684	0.092171	1.32843	4.38435	BTG1;CD83;RNF19B;IRS2;CXCL3;SAT1;ICAM1;IFIT2;IFIH1;PANX1;PLAU;NAMPT;SLC16A6;IER5;PHLDA1;IER2;DUSP4;KDM6B;KLF10;TGIF1;DUSP5;FOS;SERPINB8;GEM;IRF1;SIK1;TRIB1;SQSTM1;BIRC2;B4GALT5;PPP1R15A;CEBPB;SDC4;TANK;RELA;FUT4;SNN;DRAM1;NFIL3;LDLR;JAG1;SMAD3;GCH1;TIPARP;TNFRSF9;LIF;ZBTB10;KLF4;NFKB1;PNRC1;KLF2;EIF1;VEGFA;NFKB2;FOSL1;NR4A2;PER1;NR4A1;BMP2;NR4A3;BCL6;ID2;CLCF1;BHLHE40;KLF9;MXD1;NFE2L2
Hedgehog Signaling	0.0475103	0.11312	1.88033	5.729	NRP1;CNTFR;ACHE;PTCH1;CRMP1;GLI1;L1CAM;PML;VEGFA;SHH;ADGRG1;SLIT1;NF1;MYH9;NKX6-1
Estrogen Response Early	0.0923525	0.209892	1.24001	2.95389	SCARB1;WWC1;SLC2A1;ABAT;AFF1;FAM102A;DEPTOR;MYB;TBC1D30;RRP12;TGM2;KLF10;TGIF2;DYNLT3;FOS;GAB2;CBFA2T3;SULT2B1;TIAM1;SLC7A5;ELF1;RARA;PPIF;BLVRB;MAPT;FKBP4;NBL1;FKBP5;CANT1;PEX11A;SLC1A1;SEMA3B;RHOBTB3;ISG20L2;ASB13;ADD3;THSD4;SEC14L2;SLC9A3R1;SYNGR1;MUC1;PODXL;LRIG1;SH3BP5;FLNB;CA12;FARP1;SVIL;XBP1;SLC16A1;OPN3;TIPARP;GREB1;INHBB;KLF4;MED13L;KRT18;MYBBP1A;FASN;DLC1;BHLHE40;DHCR7;GLA;TJP3
Fatty Acid Metabolism	0.107771	0.234285	1.25549	2.79691	ACSM3;ECI1;UBE2L6;ENO2;ALAD;NSDHL;MCEE;LGALS1;CPT2;AUH;ME1;IDH3B;HADH;HIBCH;YWHAH;ACOT8;GABARAPL1;HSP90AA1;ADSL;ACSL1;SDHD;CEL;ACOX1;EHHADH;ERP29;SUCLG2;XIST;BLVRA;ECHS1;PDHB;HSD17B7;ADIPOR2;HSD17B10;ACAT2;PTS;CRYZ;HMGCL;LDHA;HSPH1;NTHL1;D2HGDH;DECR1;S100A10;MDH1;IDH1;NCAPH2;CCDC58;PRDX6;FASN;OSTC;CRAT
Hypoxia	0.120686	0.241371	1.21142	2.56163	GPI;SCARB1;BTG1;CDKN1B;CITED2;NCAN;SLC2A1;IRS2;RORA;ENO1;ENO2;RBPJ;NR3C1;HK1;NDST1;CSRP2;KIF5A;PIM1;IDS;PGM2;PGM1;TGM2;TPD52;BNIP3L;WSB1;TPI1;ANXA2;GAA;FOS;AMPD3;SAP30;SULT2B1;LOX;DDIT3;MYH9;PLIN2;S100A4;GAPDH;TMEM45A;PPP1R15A;KDM3A;SDC4;FOXO3;LDHA;PRDX5;UGP2;NFIL3;GPC1;MXI1;HMOX1;CA12;HSPA5;TIPARP;KLHL24;PNRC1;VEGFA;EXT1;SLC6A6;KLF7;EFNA3;PFKL;CCNG2;BHLHE40
Apical Junction	0.120686	0.241371	1.21142	2.56163	ITGB1;IRS1;INPPL1;LAMC2;ICAM5;WASL;PIK3CB;ADRA1B;ACTB;ICAM1;SGCE;AKT2;DHX16;SIRPA;HADH;AMH;TMEM8B;YWHAH;CAP1;SLC30A3;ACTN2;TSC1;ACTN4;TUBG1;EXOC4;MYH9;CDH15;PFN1;VCL;SKAP2;NLGN3;SHC1;SRC;AMIGO1;NEXN;ATP1A3;NRXN2;GNAI1;GNAI2;THBS3;CNN2;EPB41L2;TSPAN4;RSU1;PCDH1;MYH10;CD276;VASP;JUP;PBX2;PARVA;BAIAP2;SORBS3;MAPK13;MAPK11;NFASC;PPP2R2C;TAOK2;CNTN1;NF1;NF2;CRAT;FBN1
UV Response Up	0.143522	0.266025	1.21917	2.36673	FEN1;BTG1;AMD1;CLTB;HNRNPU;ENO2;ICAM1;CCND3;SPR;PPAT;RFC4;SIGMAR1;FOS;MAPK8IP2;MMP14;IRF1;PPIF;FKBP4;SQSTM1;TGFBRAP1;CEBPG;WIZ;HSPA13;CYB5R1;STIP1;NXF1;PPP1R2;BCL2L11;CREG1;AP2S1;HMOX1;MGAT1;POLR2H;E2F5;BID;YKT6;CYB5B;KLHDC3;GCH1;RAB27A;ASNS;HSPA2;DNAJA1;NR4A1;BMP2;NAT1;PSMC3;DLG4;FGF18;CDK2
Pperoxisome	0.143653	0.266025	1.27871	2.48116	SLC35B2;SEMA3C;PEX11A;VPS4B;BCL10;CLN6;HMGCL;PRDX5;PRDX1;LONP2;TSPO;YWHAH;FIS1;ACOT8;SMARCC1;CADM1;ACSL1;IDH1;EPHX2;SIAH1;CTPS1;CEL;SOD1;SULT2B1;SLC25A17;MSH2;ERCC3;DLG4;ACOX1;EHHADH;PEX6;ERCC1;ITGB1BP1;CRAT
Androgen Response	0.251444	0.449007	1.18222	1.63209	SRP19;STK39;HSD17B14;DBI;SAT1;CDC14B;CAMKK2;ELK4;LMAN1;HERC3;CCND3;ZMIZ1;MAP7;AKT1;DNAJB9;RRP12;TPD52;RAB4A;XRCC6;XRCC5;NCOA4;ZBTB10;LIFR;PA2G4;MERTK;APPBP2;SCD;CENPN;GPD1L;SEC24D;FKBP5
Glycolysis	0.348267	0.60046	1.07465	1.13352	B4GALT2;CHPF;CITED2;MPI;IRS2;ENO1;ENO2;NSDHL;STMN1;GMPPA;ME1;PGM2;TPI1;COG2;TALDO1;SAP30;TPST1;PKM;CHST1;SLC25A10;RBCK1;CHST4;FKBP4;ALDH7A1;PPIA;B4GALT4;GNE;SLC25A13;PRPS1;IDUA;TGFA;TXN;CENPA;CLN6;AURKA;LDHA;UGP2;GPC1;MXI1;MDH1;HSPA5;B3GAT3;IDH1;GFPT1;GOT2;MERTK;VEGFA;SOD1;EXT1;EFNA3;GCLC;GNPDA1;NASP;ARTN;CTH;SDC1;AGRN;POLR3K
Epithelial Mesenchymal Transition	0.408225	0.680376	1.04847	0.939359	ITGB1;ECM1;SPARC;SERPINE2;MCM7;WIPF1;ELN;COL12A1;LAMC2;LAMC1;ENO2;FGF2;SAT1;LOXL2;LGALS1;BASP1;SGCB;ANPEP;DPYSL3;TIMP3;TIMP1;TGM2;MMP1;TPM1;APLP1;MMP3;EMP3;GEM;ACTA2;MMP14;LOX;COL4A1;ADAM12;GAS1;SDC4;LRP1;LAMA1;CAPG;FBLN5;GPC1;SPOCK1;SLIT3;CAP2;IL32;TGFB1;CADM1;BDNF;VEGFC;VEGFA;COL1A1;ID2;COL7A1;CALU;SDC1;CRLF1;SNTB1;FBN1
Interferon Alpha Response	0.423851	0.68363	1.06722	0.916078	IFITM3;SAMD9L;UBA7;GMPR;UBE2L6;IFI30;IFIT2;OASL;HELZ2;IFIH1;NUB1;TRIM21;HERC6;BATF2;CD74;HLA-C;IFI44;TDRD7;NMI;MOV10;PSMA3;ELF1;OAS1;IRF1;PSME2;TXNIP;LAP3;IRF9
Apical Surface	0.439714	0.686614	1.10277	0.90607	AFAP1L2;NCOA6;HSPB1;SLC2A4;BRCA1;GATA3;EFNA5;ADIPOR2;SULF2;FLOT2;GAS1;MDGA1;TMEM8B
IL-2/STAT5 Signaling	0.453165	0.686614	1.02988	0.815151	IFITM3;NRP1;ECM1;CD83;CD81;RORA;AHR;IKZF4;PDCD2L;CCND3;ALCAM;GLIPR2;NCS1;PIM1;CAPN3;PHLDA1;TGM2;GABARAPL1;ANXA4;SWAP70;APLP1;FLT3LG;FAM126B;ETV4;SERPINB6;TIAM1;PTRH2;PLIN2;UMPS;TNFRSF21;PLEC;AHNAK;RGS16;CAPG;SLC1A5;MUC1;SYNGR2;NFIL3;LRIG1;SNX9;XBP1;RABGAP1L;TNFRSF9;PTCH1;SPRY4;LIF;HUWE1;FAH;IGF2R;HIPK2;BMP2;AMACR;P2RX4;MYO1C;BHLHE40;MXD1
Bile Acid Metabolism	0.524292	0.768753	1.00624	0.649732	BCAR3;SLC35B2;PEX11A;CROT;HSD17B6;PEX26;NR3C2;LIPE;PRDX5;SLC22A18;LONP2;HACL1;ABCA2;PHYH;ACSL1;PNPLA8;IDH1;EPHX2;PEX1;PEX12;SOD1;SULT2B1;PEX7;AMACR;NPC1;PEX6;PXMP2;SLC29A1;PFKM;SLC27A5;OPTN
Notch Signaling	0.538127	0.768753	1.02883	0.637524	KAT2A;NOTCH1;JAG1;MAML2;FZD7;PSEN2;SKP1;SAP30;RBX1
Interferon Gamma Response	0.596779	0.82886	0.972136	0.501825	IFITM3;SAMD9L;CIITA;BTG1;EIF4E3;SPPL2A;UBE2L6;IFIT1;IFI30;IFIT2;ICAM1;IL18BP;OASL;IFIH1;NAMPT;PIM1;UPP1;TRIM21;HERC6;BATF2;HLA-B;HLA-A;BPGM;TAPBP;PSMA3;PSMA2;IRF1;OAS3;PELI1;PSME2;TXNIP;IRF5;LAP3;RBCK1;IRF9;NLRC5;NOD1;SRI;SAMHD1;HIF1A;PSMB10;HELZ2;RNF213;PSMB2;METTL7B;CD74;GCH1;STAT1;IFI44;TDRD7;NMI;NFKB1;PML;HLA-DRB1
Xenobiotic Metabolism	0.657362	0.888327	0.947403	0.397454	CYFIP2;SLC35B1;SPINT2;CROT;COMT;CNDP2;ALDH2;ACP2;MAN1A1;UPP1;GABARAPL1;ARG2;ABCC2;IL1R1;ENTPD5;DHPS;PGD;TPST1;ACOX2;NPC1;ACOX1;BLVRB;HPRT1;BCAT1;SHMT2;LCAT;SLC1A5;PTS;RAP1GAP;PSMB10;NFS1;TKFC;DDT;ATOH8;HMOX1;ASL;HACL1;APOE;XDH;SLC12A4;JUP;GCH1;SMOX;GAD1;PTGES3;IDH1;FAH;DHRS1;AP4B1;SLC6A6;GCLC;PINK1;ID2
Myogenesis	0.766609	0.999995	0.89896	0.238925	ITGB1;ACHE;SPARC;MYL6B;FGF2;AKT2;SPTAN1;EPHB3;MEF2A;GABARAPL2;CHRNB1;ATP6AP1;ACTN2;ACSL1;TPM3;GAA;IFRD1;SIRT2;PTP4A3;MRAS;MYH3;ADAM12;MYH9;ITGA7;MAPRE3;HDAC5;NOTCH1;PSEN2;FOXO4;CNN3;SYNGR2;IGFBP7;CKB;MEF2D;SH3BGR;SH2B1;SVIL;TGFB1;DMPK;PDE4DIP;SORBS3;COL1A1;GNAO1;RIT1;MYO1C;SCD;BHLHE40;PLXNB2;AGRN;CRAT;PFKM
Estrogen Response Late	0.813256	0.999995	0.875237	0.18092	SCARB1;NAB2;LAMC2;AFF1;FAM102A;IMPA2;MYB;DYNLT3;METTL3;EMP2;FOS;SULT2B1;TIAM1;SLC7A5;CCNA1;ACOX2;PPIF;BLVRB;HPRT1;MAPT;SLC29A1;FKBP4;NBL1;FKBP5;RNASEH2A;HSPA4L;SEMA3B;ADD3;SLC9A3R1;FLNB;CKB;PLK4;CA12;FARP1;GINS2;XBP1;SLC16A1;OPN3;XRCC3;ATP2B4;DNAJC12;COX6C;KLF4;MAPK13;FABP5;ID2;CD9;DHCR7;GLA;TJP3
Angiogenesis	0.815467	0.999995	0.750811	0.153161	JAG2;NRP1;JAG1;S100A4;TIMP1;TNFRSF21;VEGFA;FGFR1
Spermatogenesis	0.865466	0.999995	0.81574	0.117864	MAST2;HSPA4L;PEBP1;SPATA6;PCSK4;AURKA;COIL;CCNB2;MAP7;NEK2;TNNI3;TOPBP1;IL13RA2;AGFG1;SLC12A2;RFC4;GAD1;CSNK2A2;TALDO1;BRAF;HSPA2;SIRT1;PIAS2;MLF1;MTOR;MLLT10;CCNA1;CAMK4;VDAC3;NF2;STAM2;EZH2
IL-6/JAK/STAT3 Signaling	0.90852	0.999995	0.733685	0.0703884	CNTFR;TGFB1;IL1R1;STAT1;IL10RB;CXCL3;ACVR1B;CBL;IL17RA;IRF1;LEPR;PIM1;HMOX1;CD9;GRB2;A2M;STAM2;IRF9;TNFRSF21
Reactive Oxygen Species Pathway	0.950506	0.999995	0.590881	0.0299935	PRDX2;GCLC;PRDX1;MBP;TXN;PRDX6;ATOX1;SOD1;LAMTOR5
Complement	0.969872	0.999995	0.739462	0.0226208	USP14;USP15;CEBPB;DYRK2;PRDM4;LRP1;SRC;CBLB;GATA3;PSEN1;CTSS;GNAI2;C3;DOCK10;LGALS3;VCPIP1;AKAP10;PCLO;CSRP1;CTSL;LAMP2;PIM1;ME1;LTA4H;TIMP1;CTSC;CD55;DUSP5;APOBEC3F;APOBEC3G;HSPA5;ACTN2;BRPF3;ATOX1;MMP14;F8;ZEB1;IRF1;CALM3;GRB2;LAP3;PFN1;CALM1;LGMN
KRAS Signaling Up	0.97965	0.999995	0.717872	0.0147596	PPP1R15A;NRP1;MTMR10;FLT4;RGS16;SEMA3B;LY96;CROT;CBL;HDAC9;CTSS;GPNMB;PLAU;AKT2;BTBD3;MAP7;SCN1B;ST6GAL1;RABGAP1L;JUP;GABRA3;LIF;VWA5A;ETV1;BPGM;KLF4;ETV4;EREG;LAT2;ADAM17;BMP2;TMEM158;ZNF639;ID2;HKDC1;MALL;CCSER2;STRN;LCP1;TRIB1;AVL9;TRIB2;ZNF277
Pancreas Beta Cells	0.980421	0.999995	0.463376	0.00916258	SPCS1;SRPRB;PAX6;SRP14;NKX6-1;SEC11A
Allograft Rejection	0.986623	0.999995	0.696564	0.00938085	ACHE;DYRK3;UBE2D1;CAPG;MTIF2;BCL10;BRCA1;HIF1A;HDAC9;CTSS;PSMB10;ICAM1;IL27RA;MRPL3;CCND3;AKT1;IL12A;CSK;TIMP1;APBB1;MAP3K7;SOCS5;NCK1;PRKCG;TPD52;EIF5A;CD74;TGFB1;STAT1;LIF;TAP2;IL16;INHBB;HLA-A;EREG;NME1;TAPBP;ABI1;UBE2N;BCAT1;EIF3D;TLR3
Coagulation	0.988389	0.999995	0.637737	0.00744783	SPARC;WDR1;LRP1;PEF1;USP11;C3;CSRP1;PLAU;CTSK;LAMP2;TIMP3;LTA4H;TIMP1;A2M;MMP1;MST1;MMP3;SIRT2;KLF7;TF;MMP14;F8;DCT;ACOX2;CD9;LGMN;FBN1
Inflammatory Response	0.996795	0.999995	0.634276	0.00203602	RGS16;AHR;PSEN1;SRI;ACVR1B;ATP2C1;SLC4A4;HIF1A;SLC7A1;RELA;ICAM1;BEST1;NAMPT;ITGB8;KIF1B;TIMP1;LDLR;SCN1B;CD55;PTGIR;GCH1;SEMA4D;IL1R1;CD70;TNFRSF9;LIF;CYBB;NMI;EMP3;NFKB1;EREG;TAPBP;MMP14;P2RX4;AXL;IRF1;ABI1;MXD1;TLR3
KRAS Signaling Dn	0.999995	0.999995	0.355709	1.89e-06	EPHA5;CNTFR;KMT2D;TENM2;SLC30A3;GTF3C5;IDUA;CLSTN3;MAST3;PLAG1;ENTPD7;MTHFR;SOX10;NR4A2;CCNA1;SNN;MSH5;KCNN1;SLC16A7;ASB7;TNNI3;SKIL;PDK2;SLC29A3

## Sheet: UM-UC-3 B1TKO GSEA
pathway	pval	padj	log2err	ES	NES	size	leadingEdge
HALLMARK_E2F_TARGETS	1.0613e-33	5.30651e-32	1.50926	-0.646618	-3.17431	194	DSCC1|MELK|POLD3|NASP|TIPIN|POLD1|HNRNPD|GINS1|MYBL2|POLE|RBBP7|LMNB1|STMN1|XRCC6|RANBP1|MCM7|SNRPB|PCNA|SPC24|HMGB2|SRSF2|RAN|RAD51C|MCM3|TRA2B|LIG1|MCM5|TK1|DDX39A|TRIP13|NUP107|PNN|EZH2|CDC25A|SRSF1|AK2|MCM6|KIF22|DUT|LYAR|UNG|PSMC3IP|NAA38|RFC2|CSE1L|ESPL1|TBRG4|AURKB|MCM2|MMS22L|RNASEH2A|PHF5A|SUV39H1|DNMT1|BIRC5|PRKDC|PTTG1|PA2G4|NME1|CDKN2C|MSH2|CDK4|UBR7|HMGB3|GINS3|MCM4|PAICS|TUBB|NOP56|…
HALLMARK_MYC_TARGETS_V1	1.79303e-30	4.48258e-29	1.43181	-0.627064	-3.07832	194	RFC4|TYMS|TCP1|SRSF7|HSPE1|PPIA|SNRPD3|HNRNPD|C1QBP|NHP2|XRCC6|RANBP1|MCM7|SNRPD1|PSMA4|PCNA|U2AF1|SRSF2|CCT2|RAN|SMARCC1|TRA2B|MCM5|SNRPG|RUVBL2|HNRNPU|HNRNPA2B1|SNRPA1|ERH|NDUFAB1|SRSF1|PSMA2|HNRNPA1|LDHA|MCM6|TFDP1|SF3B3|DUT|CCT3|UBE2L3|PSMD1|CDC45|DHX15|MCM2|SRSF3|TXNL4A|CCT7|PSMB2|GOT2|CDK2|PA2G4|NME1|RRM1|CDK4|SNRPD2|G3BP1|MCM4|PSMA1|PHB2|NOP56|HSP90AB1|SLC25A3|SRM|HNRNPR|CCT5|PTGES3|LSM2|C…
HALLMARK_G2M_CHECKPOINT	3.05448e-19	5.09081e-18	1.13309	-0.552329	-2.68667	186	EWSR1|NASP|SFPQ|HNRNPD|MYBL2|GINS2|POLE|E2F2|DTYMK|LMNB1|STMN1|SNRPD1|NUMA1|SRSF2|CHAF1A|MCM3|SMARCC1|TRA2B|MCM5|DDX39A|HSPA8|EZH2|HNRNPU|CDC25A|SRSF1|TGFB1|RBM14|E2F1|MCM6|KIF22|TFDP1|HMGN2|CDC45|ESPL1|KIF15|NDC80|AURKB|MCM2|TPX2|NCL|UBE2C|SUV39H1|BIRC5|TRAIP|PTTG1|CDKN2C|HIRA|CDK4|HMGB3|INCENP|G3BP1|TMPO|PRC1|E2F4|RAD54L|CKS1B|KIF23|CKS2|POLA2|CBX1|PLK4|SMC1A|CCNF|SRSF10|FBXO5|AURKA|PML|ATF5|KP…
HALLMARK_DNA_REPAIR	5.16653e-12	6.45816e-11	0.887075	-0.515969	-2.42507	140	USP11|RFC4|TYMS|ITPA|POLD3|POLD1|ADCY6|POLR2G|ERCC1|FEN1|GTF2A2|PCNA|POLR2E|RBX1|ALYREF|LIG1|NELFCD|POLA1|BCAP31|POLR2D|NME4|AAAS|TARBP2|UMPS|DUT|SURF1|RAD51|RFC2|SRSF6|POLR2H|CSTF3|POLH|ERCC3|RFC5|ZWINT|COX17|NME1|GUK1|APRT|RFC3|CANT1|POLR2F|SSRP1|GTF2H5|RPA3|TAF12|PRIM1|POLA2|POLR2K|POLE4|TAF10|DDB2
HALLMARK_OXIDATIVE_PHOSPHORYLATION	1.28612e-07	1.28612e-06	0.690132	-0.409848	-2.00107	181	IMMT|NDUFC2|NDUFB6|UQCRQ|MRPL35|COX6A1|COX7A2|IDH3B|NDUFAB1|TIMM8B|COX6B1|LDHA|NDUFB2|SURF1|NDUFS3|MDH1|NDUFV2|SLC25A20|CYB5R3|LDHB|NDUFS8|ECI1|NDUFB8|UQCR10|COX6C|COX8A|GOT2|COX17|NDUFA2|NDUFC1|UQCRFS1|NDUFB1|NDUFB3|TIMM13|PHB2|NDUFV1|SLC25A3|COX5B|COX7B|POLR2F|ACAT1|BAX|SDHD|SDHB|MRPS11|NDUFB7|UQCRB|VDAC1|HSD17B10|DECR1|NDUFA1|COX7C|MRPL11|PDHB|CYC1|UQCRH|PMPCA|MRPS22|NDUFS6|NDUFA9|UQCR11|ECHS1…
HALLMARK_MYC_TARGETS_V2	5.47035e-06	4.55863e-05	0.610527	-0.537656	-2.12758	57	HSPE1|NIP7|IPO4|MCM5|TCOF1|UNG|TBRG4|LAS1L|UTP20|RABEPK|PA2G4|CDK4|MCM4|MAP3K6|NOP56|GRWD1|SRM|MYBBP1A|RRP12|SLC19A1|TFB2M|PLK4|PLK1|NOLC1|HSPD1|DCTPP1|NOP16|PUS1|MRTO4|NPM1
HALLMARK_MTORC1_SIGNALING	0.00024197	0.00172836	0.518848	-0.332141	-1.61731	189	PSMC2|PHGDH|ASNS|ENO1|HSPE1|PPIA|PSAT1|HMBS|IMMT|PSMA3|SLC1A5|PSMA4|PRDX1|DDX39A|CDC25A|TPI1|YKT6|LDHA|CACYBP|UNG|STIP1|CCT6A|TM7SF2|SLC6A6|MCM2|PFKL|SEC11A|GAPDH|PGM1|HSPA4|PSME3|BCAT1|SLC7A11|MCM4|RPA1|CYB5B|DHCR7|CTSC|CD9|SLC2A1|ADIPOR2|SCD|EIF2S2|CCNF|LDLR|AURKA|EEF1E1|ELOVL6|PSMB5|QDPR|PSMD14|GGA2|SHMT2|SLC9A3R1|PLK1|SLC7A5|TUBG1|GLA|ADD3|HPRT1|HSPD1|GPI|ACACA|G6PD|NUP205|PGK1|DHCR24|RRM2|PD…
HALLMARK_TNFA_SIGNALING_VIA_NFKB	0.000508069	0.00317543	0.477271	0.349855	1.63408	165	BTG1|NFIL3|GEM|PER1|BMP2|TGIF1|VEGFA|NR4A3|PNRC1|BCL6|DUSP4|KLF4|MXD1|SLC16A6|LIF|SERPINB8|NAMPT|PHLDA1|DRAM1|ID2|PPP1R15A|CEBPB|ICAM1|RNF19B|NFE2L2|IRS2|TRIB1|DUSP5|NR4A1|KDM6B|IFIH1|ZBTB10|BIRC2|TIPARP|KLF10|TANK|KLF9|SAT1|IFIT2|SNN|BHLHE40|JAG1|EIF1|NR4A2|RELA
HALLMARK_KRAS_SIGNALING_UP	0.00107632	0.00597953	0.45506	0.366864	1.63732	123	ADAM17|BMP2|ZNF277|NRP1|CCSER2|KLF4|AVL9|LIF|HDAC9|EREG|ID2|MAP7|GPNMB|PPP1R15A|TMEM158|ZNF639|LCP1|TRIB2|MTMR10|TRIB1|STRN|GABRA3|ETV1|CTSS|LY96|JUP|RABGAP1L|CROT|ETV4|RGS16|CBL|SEMA3B|HKDC1|BTBD3|EPB41L3|MAP3K1|EPHB2|APOD|MMD|SPP1|GPRC5B|GNG11|CA2|PTCD2|SPRY2|INHBA|SCG3|CPE|TFPI|ALDH1A3|CAB39L|EVI5|SPARCL1|MMP9|ERO1A
HALLMARK_MITOTIC_SPINDLE	0.00475288	0.0237644	0.407018	-0.295036	-1.44469	193	EPB41L2|MYH10|EZR|LMNB1|NUMA1|SPTAN1|ACTN4|PALLD|MAP3K11|PIF1|PLEKHG2|KIF22|ITSN1|GEMIN4|TBCD|VCL|ESPL1|KIF15|NDC80|TPX2|ANLN|BIRC5|CEP192|KNTC1|SPTBN1|INCENP|MAPRE1|FLNB|CDC42|PRC1|MYH9|TUBGCP6|KIF23|FARP1|TUBGCP2|KIF1B|ATG4B|NF1|PCNT|TIAM1|SMC1A|KIF3B|FBXO5|AURKA|CENPJ|TAOK2|CNTROB|PLK1|CCNB2|ALMS1|YWHAE|RACGAP1|RHOT2|BCR|FSCN1|DST|ARHGDIA|MYO1E|DYNLL2|DLG1|DLGAP5|KIF2C|TOP2A|CDK1|LLGL1|SAC3D1|…
HALLMARK_PEROXISOME	0.0101504	0.0461384	0.38073	-0.341837	-1.45202	85	FIS1|SLC35B2|ITGB1BP1|SLC25A17|ERCC1|CLN6|SOD1|PRDX1|TSPO|SMARCC1|PEX11A|PRDX5|PEX6|YWHAH|ERCC3|MSH2|ACOT8
